# Supplementary material
Source: Research Square preprint supplement (doi:10.21203/rs.3.rs-9601429/v1)
Supplement: Supplementary file 2 [file 6b55224530a638445d6a95e0.xlsx]

## Sheet: Supplementary Table S1
Supplementary Table 1. List of 300 accessions from the panel of the 3K RGP evaluated for yield and yield related traits
IRIS ID	IRGC No.	DESIGNATION	Sub_Population	Origin of Country
IRIS-313-8791	IRGC 117423	ARANG	ind3	Indonesia
IRIS-313-10352	IRGC 120922	CT 9737-6-1-1-2-2P-M::IRGC 117330-1	indx	Colombia
IRIS-313-10412	IRGC 121103	RR 272-17-829::IRGC 117354-1	indx	Indonesia
IRIS-313-10285	IRGC 121119	SICAN::IRGC 117029-1	indx	Peru
IRIS-313-10421	IRGC 121154	WAR 72-2-1-1::IRGC 117361-1	indx	Sierra Leone
IRIS-313-9939	IRGC 121316	CIWINI SML::IRGC 50642-1	admix	Surinam
IRIS-313-9817	IRGC 121342	GEANT W 7::IRGC 9620-1	ind2	Netherlands
IRIS-313-9039	IRGC 121441	MUTTU SAMBA::IRGC 36333-1	ind2	Sri Lanka
IRIS-313-8324	IRGC 121474	POENOET HITAM::IRGC 8193-1	admix	Indonesia
IRIS-313-7641	IRGC 121974	B 6144-MR-6-0-0::C1	indx
IRIS-313-7668	IRGC 122029	DANAU LAUT TAWAR::C1	indx
IRIS-313-7681	IRGC 122076	H 15-23-DA::C1	indx
IRIS-313-7685	IRGC 122089	IR 19746-28-2-2::IRGC 78072-C1	ind1B	Philippines
IRIS-313-7698	IRGC 122098	IR 57920-AC 25-2-B::C1	indx
IRIS-313-7699	IRGC 122099	IR 57924-24::IRTP 16675-C1	indx
IRIS-313-7924	IRGC 122120	IRAT 335::C1	trop
IRIS-313-7719	IRGC 122140	KOGONI 91-1::C1	indx
IRIS-313-7993	IRGC 122276	VARY LAVA DE BETAFO::GERVEX 8381-C1	trop
IRIS-313-7808	IRGC 122285	WAS 173-B-B-6-2-2::C1	ind1B
IRIS-313-7809	IRGC 122286	WAS 174-B-3-5::C1	indx
IRIS-313-7826	IRGC 122292	WAS 33-B-B-15-1-4-5::C1	ind1B
IRIS-313-9091	IRGC 124442	SINNA SITHIRA KALI::IRGC 51064-1	indx	Sri Lanka
IRIS-313-8412	IRGC 125609	FEI GAI 122::IRGC 63599-1	indx	China
IRIS-313-8872	IRGC 125630	571::IRGC 48493-1	japx	Thailand
IRIS-313-8986	IRGC 125637	ARC 10754::IRGC 12603-1	indx	India
IRIS-313-9053	IRGC 125644	ARC 12536::IRGC 41068-1	admix	India
IRIS-313-9347	IRGC 125647	ARC 13778::IRGC 41216-1	indx	India
IRIS-313-8844	IRGC 125648	ARC 14060::IRGC 41374-1	ind2	India
IRIS-313-8850	IRGC 125657	ASHMBER::IRGC 27522-1	ind2	Bangladesh
IRIS-313-9148	IRGC 125664	BADAL 1163::IRGC 32796-1	ind2	Bangladesh
IRIS-313-9067	IRGC 125681	BHOJON KOLPO::IRGC 31727-1	ind2	Bangladesh
IRIS-313-9348	IRGC 125684	BK 26::IRGC 45197-1	ind2	India
IRIS-313-9637	IRGC 125689	BONG BOI::IRGC 32094-1	ind3	Viet Nam
IRIS-313-10071	IRGC 125705	CHIYODA WASE::IRGC 74467-1	trop	Japan
IRIS-313-10272	IRGC 125714	COLOMBIA 1::IRGC 116970-1	japx	Colombia
IRIS-313-9023	IRGC 125715	CR 60-10::IRGC 15777-1	indx	India
IRIS-313-10109	IRGC 125735	EX EBOKOZURU::IRGC 79912-1	ind3	Nigeria
IRIS-313-8909	IRGC 125740	FAYA MOSHI::IRGC 69653-1	ind3	Tanzania
IRIS-313-9139	IRGC 125754	GOJOL GORIA::IRGC 26629-1	ind2	Bangladesh
IRIS-313-9602	IRGC 125765	HTA 22::IRGC 45827-1	indx	Thailand
IRIS-313-10224	IRGC 125766	HUA LI ZAO::IRGC 80950-1	ind1A	China
IRIS-313-9032	IRGC 125800	KHAO GRADOOK CHAHNG::IRGC 17111-1	ind1B	Thailand
IRIS-313-9281	IRGC 125801	KHAO KAI::IRGC 78251-1	ind3	Thailand
IRIS-313-9121	IRGC 125802	KHAO LEUANG RAI::IRGC 48168-1	ind2	Thailand
IRIS-313-10026	IRGC 125804	KITRANA 1007::IRGC 68517-1	ind2	Madagascar
IRIS-313-9968	IRGC 125810	KULA KARUPPAN::IRGC 55328-1	indx	Sri Lanka
IRIS-313-9696	IRGC 125850	NAZIRA SAIL::IRGC 77284-1	indx	Bangladesh
IRIS-313-9492	IRGC 125853	NCS 237::IRGC 62202-1	ind2	India
IRIS-313-10032	IRGC 125858	NS 1576::IRGC 68951-1	aro	Madagascar
IRIS-313-9570	IRGC 125859	NX 3533::IRGC 63796-1	indx	China
IRIS-313-9882	IRGC 125863	O. SATIVA::IRGC 17083-1	indx	Taiwan
IRIS-313-8873	IRGC 125867	PAOTSUPAGAIAHON::IRGC 17072-1	admix	Taiwan
IRIS-313-8920	IRGC 125869	PATALASAFED SUNGHAWADO::IRGC 61133-1	ind2	India
IRIS-313-10234	IRGC 125873	PSBRC 50::IRGC 99706-1	ind1B	Philippines
IRIS-313-9898	IRGC 125880	QUERO ASSAN::IRGC 28860-1	ind3	Portugal
IRIS-313-10034	IRGC 125886	RIZ INDETERMINE::IRGC 69014-1	indx	Niger
IRIS-313-10035	IRGC 125887	RIZ TYPE SORGHO::IRGC 69015-1	ind2	Madagascar
IRIS-313-9604	IRGC 125890	RPA 5929 (K 45)::IRGC 33963-1	indx	India
IRIS-313-10129	IRGC 125897	SAN SHIH TSI::IRGC 1038-1	ind1A	China
IRIS-313-10247	IRGC 125949	AMISTAD 82::IRGC 116954-1	ind1B	Cuba
IRIS-313-10337	IRGC 125953	B 6149 F-MR-7::IRGC 117314-1	indx	Indonesia
IRIS-313-10002	IRGC 125955	BW 295-5::IRGC 63098-1	ind1B	Sri Lanka
IRIS-313-10325	IRGC 125956	CAMPONI::IRGC 116963-1	indx	Surinam
IRIS-313-10348	IRGC 125959	CSR-89 IR-15::IRGC 117326-1	indx	India
IRIS-313-10263	IRGC 125961	CUYAMEL 3820::IRGC 116975-1	indx	Mexico
IRIS-313-10271	IRGC 125966	IA CUBA 17::IRGC 116990-1	indx	Cuba
IRIS-313-10275	IRGC 125968	ICTA MOTAGUA::IRGC 116995-1	indx	Guatemala
IRIS-313-10314	IRGC 125969	INIAP 10::IRGC 117000-1	indx	Ecuador
IRIS-313-8392	IRGC 125970	IR 2003-P7-7-4-2::IRGC 32671-1	ind1B	Philippines
IRIS-313-10294	IRGC 125972	IR 21015-72-3-3-3-1::IRGC 117004-1	indx	Philippines
IRIS-313-10359	IRGC 125973	IR 53650-2B-10-1-2-1::IRGC 117379-1	indx	Philippines
IRIS-313-10366	IRGC 125976	IR 65483-111-5-9-2-11::IRGC 117286-1	indx	Philippines
IRIS-313-10374	IRGC 125979	IR 69502-6-SRN-3-UBN-1-B::IRGC 117290-1	indx	Philippines
IRIS-313-10396	IRGC 125987	IR 80340-23-B-12-6-B::IRGC 117309-1	indx	Philippines
IRIS-313-10402	IRGC 125990	IRGA 411-1-6-1F-A::IRGC 117344-1	ind1B	Colombia
IRIS-313-9623	IRGC 126001	PESAGRO 102::IRGC 78703-1	indx	Brazil
IRIS-313-10360	IRGC 126025	IR 57514-PMI 5-B-1-2::IRGC 117372-1	indx	Philippines
IRIS-313-10385	IRGC 126062	IR 75870-5-8-5-B-1::IRGC 117297-1	ind1B	Philippines
IRIS-313-9522	IRGC 126084	RPW 9-4 (SS 1)::IRGC 50690-1	indx	India
IRIS-313-10318	IRGC 126085	RUSTIC::IRGC 117026-1	indx	Guyana
IRIS-313-8380	IRGC 126123	SAN CHIAO TSWEN::IRGC 1565-1	ind1A	China
IRIS-313-9259	IRGC 126150	G 25::IRGC 45733-1	ind2	India
IRIS-313-8985	IRGC 126153	KHAO' HAWM::IRGC 78257-1	ind3	Thailand
IRIS-313-9258	IRGC 126158	MAKRO::IRGC 74763-1	ind2	India
IRIS-313-9926	IRGC 126162	TOURBE::IRGC 47066-1	indx	Chad
IRIS-313-9935	IRGC 126167	MEKENZIE SMALL::IRGC 49895-1	ind2	Guyana
IRIS-313-8783	IRGC 126170	105::IRGC 40896-1	admix	Sri Lanka
IRIS-313-8621	IRGC 126174	ARC 11663::IRGC 42695-1	ind1B	India
IRIS-313-8699	IRGC 126178	BALASURIYA A::IRGC 66509-1	indx	Sri Lanka
IRIS-313-8751	IRGC 126209	HNANWA::IRGC 33118-1	ind3	Myanmar
IRIS-313-8679	IRGC 126216	JAO LEUANG::IRGC 65866-1	ind3	Thailand
IRIS-313-9342	IRGC 126236	LUA CHAN HUONG::IRGC 16800-1	ind3	Viet Nam
IRIS-313-8737	IRGC 126270	SADAJIRA 19-287::IRGC 38320-1	ind2	Bangladesh
IRIS-313-9944	IRGC 126312	SOLOMON RED RICE::IRGC 50950-1	indx	Solomon Islands
IRIS-313-15899	IRGC 126961	IR 45427-2B-2-2B-1-1::G1	indx
IRIS-313-15902	IRGC 126966	IRRI 146::G1	ind1B
IRIS-313-8948	IRGC 126974	BUCAYAB::IRGC 44357-1	ind3	Philippines
IRIS-313-9617	IRGC 126979	HOLDI GIRA::IRGC 31801-1	ind2	Bangladesh
IRIS-313-7722	IRGC 127001	LATSIBOZAKA 112-1::GERVEX 8233-C1	admix
IRIS-313-10340	IRGC 127040	BR 4973-34-6-6::IRGC 117317-1	indx	Bangladesh
IRIS-313-10361	IRGC 127053	IR 63295-AC 209-7::IRGC 117365-1	indx	Philippines
IRIS-313-8768	IRGC 127060	MOROFIN::IRGC 56698-1	trop	Cote d'Ivoire
IRIS-313-10287	IRGC 127068	UQUIHUA::IRGC 117037-1	ind1B	Peru
IRIS-313-11821	IRGC 127096	19::IRGC 70786-1	ind2	India
IRIS-313-12067	IRGC 127100	531::IRGC 82643-1	indx	Philippines
IRIS-313-11510	IRGC 127102	A 69-1::IRGC 55305-1	indx	Sri Lanka
IRIS-313-11523	IRGC 127106	ADIALLO::IRGC 56264-1	indx	Senegal
IRIS-313-10527	IRGC 127107	ADT 12::IRGC 6254-1	ind2	India
IRIS-313-11745	IRGC 127123	AN FU ZHAN::IRGC 67878-1	ind1A	China
IRIS-313-12234	IRGC 127124	ANLINGWUBAILI::IRGC 93363-1	ind1B	China
IRIS-313-10671	IRGC 127128	ARC 10581::IRGC 12514-1	indx	India
IRIS-313-10857	IRGC 127129	ARC 10825::IRGC 21082-1	admix	India
IRIS-313-10858	IRGC 127131	ARC 10894::IRGC 21122-1	indx	India
IRIS-313-10879	IRGC 127145	ARC 12124::IRGC 21929-1	admix	India
IRIS-313-11302	IRGC 127154	ARC 14899::IRGC 43016-1	indx	India
IRIS-313-11306	IRGC 127159	ARC 15385::IRGC 43174-1	indx	India
IRIS-313-11490	IRGC 127160	ARC 15480::IRGC 53799-1	indx	India
IRIS-313-12148	IRGC 127172	ARN'-SAR THNGORN'::IRGC 87205-1	ind3	Cambodia
IRIS-313-11160	IRGC 127195	B 38::IRGC 34409-1	ind3	Liberia
IRIS-313-11572	IRGC 127201	BAI MI TIE QIU::IRGC 59414-1	ind1A	China
IRIS-313-11563	IRGC 127227	BIJULI BATI::IRGC 58917-1	ind2	Nepal
IRIS-313-11515	IRGC 127231	BKN BR 1031-78-5-4::IRGC 55927-1	indx
IRIS-313-11606	IRGC 127233	BOKDEL::IRGC 61085-1	ind2	India
IRIS-313-11070	IRGC 127239	TUPA::IRGC 29432-1	admix	Bangladesh
IRIS-313-11423	IRGC 127243	C 1016-1::IRGC 50368-1	indx	Philippines
IRIS-313-11902	IRGC 127251	CEMPO TURI::IRGC 73667-1	ind3	Indonesia
IRIS-313-11714	IRGC 127256	CHAMPION::IRGC 66327-1	indx	Guyana
IRIS-313-11625	IRGC 127281	CHOBO::IRGC 61930-1	aro	Nepal
IRIS-313-11991	IRGC 127282	CHON::IRGC 78776-1	ind3	Lao People's Democratic Republic
IRIS-313-11855	IRGC 127292	DA GUAN YIN ZHAN::IRGC 72006-1	ind1A	China
IRIS-313-12078	IRGC 127301	DAU NGHA THAI BINH::IRGC 82891-1	indx	Viet Nam
IRIS-313-11957	IRGC 127305	DAW LUEY 4-3::IRGC 76929-1	indx	Thailand
IRIS-313-12015	IRGC 127333	DOGON IRI::IRGC 79882-1	ind2	Nigeria
IRIS-313-12221	IRGC 127351	EA LOUY::IRGC 91220-1	ind3	Lao People's Democratic Republic
IRIS-313-12259	IRGC 127352	EA NOUAN::IRGC 95147-1	ind3	Lao People's Democratic Republic
IRIS-313-12053	IRGC 127367	FACAGRO 406::IRGC 82049-1	indx	Burundi
IRIS-313-11607	IRGC 127411	HOLDIGANTHI::IRGC 61105-1	ind2	India
IRIS-313-11887	IRGC 127434	IR 19058-107-1::IRGC 72997-1	ind1B	Philippines
IRIS-313-11516	IRGC 127437	IR 3839-1::IRGC 55946-1	indx	Philippines
IRIS-313-11432	IRGC 127443	ISWAR KORA::IRGC 50674-1	admix	India
IRIS-313-11930	IRGC 127444	ITA 117::IRGC 75235-1	ind1B	Nigeria
IRIS-313-11538	IRGC 127447	J 6 IR 520 (WC 693)::IRGC 57600-1	ind1B	Philippines
IRIS-313-11027	IRGC 127454	JHONA 101::IRGC 27976-1	aus	Pakistan
IRIS-313-11505	IRGC 127469	K 1074::IRGC 55017-1	ind2	India
IRIS-313-11067	IRGC 127481	KALIBORO 600::IRGC 29367-1	aus	Bangladesh
IRIS-313-11939	IRGC 127484	KAMPTI::IRGC 75626-1	ind3	Burkina Faso
IRIS-313-11091	IRGC 127515	KHAO NON::IRGC 30051-1	indx	Lao People's Democratic Republic
IRIS-313-11565	IRGC 127536	KUSUM KATIKI::IRGC 59099-1	ind2	Nepal
IRIS-313-11543	IRGC 127537	KYUN TAW SEIN::IRGC 58072-1	ind3	Myanmar
IRIS-313-11750	IRGC 127538	L 10595::IRGC 68109-1	indx	China
IRIS-313-12301	IRGC 127556	LG 10178::IRGC 98526-1	indx	Lao People's Democratic Republic
IRIS-313-11234	IRGC 127563	LIGUNGTUNG::IRGC 38786-1	indx	Philippines
IRIS-313-12297	IRGC 127576	LOUK PASOM::IRGC 98136-1	indx	Lao People's Democratic Republic
IRIS-313-10609	IRGC 127612	MATHOLUWA::IRGC 8901-1	indx	Sri Lanka
IRIS-313-12082	IRGC 127614	MAVOLATSIKA::IRGC 83137-1	ind2	Madagascar
IRIS-313-11785	IRGC 127631	MOSHI::IRGC 69737-1	ind3	Tanzania
IRIS-313-11811	IRGC 127632	MOSHI::IRGC 70648-1	ind2	Kenya
IRIS-313-10733	IRGC 127634	MOTANGE PAHELLO LAULE::IRGC 16160-1	indx	Nepal
IRIS-313-11889	IRGC 127639	MURGI BRINJ::IRGC 73109-1	indx	Pakistan
IRIS-313-12355	IRGC 127650	NASAENG::IRGC 107819-1	indx	Lao People's Democratic Republic
IRIS-313-10683	IRGC 127674	NGAN TIA::IRGC 13010-1	ind3	Lao People's Democratic Republic
IRIS-313-11683	IRGC 127677	NIAW KHIAW NGOO::IRGC 64563-1	ind3	Thailand
IRIS-313-11558	IRGC 127684	NULI::IRGC 58824-1	ind2	Bangladesh
IRIS-313-10516	IRGC 127689	O. SATIVA::IRGC 5779-1	indx	United States of America
IRIS-313-11032	IRGC 127710	PALAM PURI BAS 137::IRGC 28084-1	aro	Pakistan
IRIS-313-10978	IRGC 127713	PANI TORONG::IRGC 26411-1	indx	Bangladesh
IRIS-313-12319	IRGC 127743	PSBRC 18::IRGC 99639-1	ind1B	Philippines
IRIS-313-11844	IRGC 127745	PUEY TAW::IRGC 71405-1	ind3	Thailand
IRIS-313-11006	IRGC 127747	PULU RENNI::IRGC 27386-1	ind3	Indonesia
IRIS-313-12296	IRGC 127773	SABALINE::IRGC 98059-1	ind3	Myanmar
IRIS-313-11162	IRGC 127775	SABRAN::IRGC 34630-1	ind1B	Indonesia
IRIS-313-12308	IRGC 127782	SAM SI::IRGC 99020-1	ind3	Lao People's Democratic Republic
IRIS-313-11733	IRGC 127801	SHUANG BAI AI 2::IRGC 67309-1	ind1A	China
IRIS-313-12269	IRGC 127802	SHWEWARHNAN::IRGC 96053-1	indx	Myanmar
IRIS-313-10517	IRGC 127812	SIPOT::IRGC 5825-1	ind3	Philippines
IRIS-313-11716	IRGC 127822	SOSSOKA::IRGC 66478-1	ind3	Guinea
IRIS-313-11237	IRGC 127835	TAICHUNG SEN YU 214::IRGC 38899-1	ind1B	Taiwan
IRIS-313-11990	IRGC 127839	TAISEN GLUTINOUS YU 1157::IRGC 78750-1	ind1B	Taiwan
IRIS-313-10560	IRGC 127848	TA PAI MAUNG::IRGC 7292-1	ind1A	China
IRIS-313-12133	IRGC 127849	TAP KHOUAY::IRGC 86373-1	ind3	Lao People's Democratic Republic
IRIS-313-12232	IRGC 127852	TE SAN AI 2::IRGC 93355-1	indx	China
IRIS-313-12270	IRGC 127864	TOAM JUM::IRGC 96077-1	indx	Myanmar
IRIS-313-11996	IRGC 127869	TUI (KIDAYAN)::IRGC 79058-1	ind3	Philippines
IRIS-313-11461	IRGC 127881	VAIKATHARYAN::IRGC 52805-1	ind2	India
IRIS-313-12283	IRGC 127884	VARY 5000 FOTSY::IRGC 97235-1	indx	Madagascar
IRIS-313-11955	IRGC 127901	YE DA GU::IRGC 76834-1	ind1A	China
IRIS-313-11910	IRGC 127907	YU HE HONG::IRGC 74266-1	indx	China
IRIS-313-11911	IRGC 127908	YUN NAN ZHAN::IRGC 74272-1	ind1A	China
IRIS-313-11036	IRGC 127919	34::IRGC 28371-2	aus	Pakistan
IRIS-313-11403	IRGC 127923	AEB 368 RIP P TYPE ADT::IRGC 49359-2	indx	India
IRIS-313-11126	IRGC 127926	ANBAW::IRGC 32932-2	indx	Myanmar
IRIS-313-11292	IRGC 127929	ARC 10120::IRGC 42557-2	indx	India
IRIS-313-10859	IRGC 127933	ARC 10939::IRGC 21150-2	indx	India
IRIS-313-10863	IRGC 127937	ARC 11322::IRGC 21315-2	ind2	India
IRIS-313-10885	IRGC 127942	ARC 12559::IRGC 22148-2	indx	India
IRIS-313-10896	IRGC 127946	ARC 13276::IRGC 22622-2	admix	India
IRIS-313-11263	IRGC 127953	ARC 13919::IRGC 41313-2	indx	India
IRIS-313-11267	IRGC 127956	ARC 14358::IRGC 41523-2	ind2	India
IRIS-313-11301	IRGC 127963	ARC 14868::IRGC 43009-2	ind2	India
IRIS-313-11305	IRGC 127964	ARC 15373::IRGC 43166-2	indx	India
IRIS-313-11310	IRGC 127968	ARC 15929::IRGC 43269-2	ind2	India
IRIS-313-11288	IRGC 127970	ARC 18434::IRGC 42429-2	indx	India
IRIS-313-10668	IRGC 127974	ARC 7255::IRGC 12343-2	indx	India
IRIS-313-12109	IRGC 127975	ARITH::IRGC 84347-2	ind3	Cambodia
IRIS-313-10448	IRGC 127996	BINOLAYANGUN::IRGC 791-2	ind3	Philippines
IRIS-313-10983	IRGC 128000	BOROJYOT::IRGC 26578-2	indx	Bangladesh
IRIS-313-11241	IRGC 128001	BR 116-3B-53::IRGC 39559-2	ind2	Bangladesh
IRIS-313-11353	IRGC 128013	CHILE BORO::IRGC 45297-2	aus	India
IRIS-313-11375	IRGC 128018	CODE NO 31225::IRGC 46865-2	aro	India
IRIS-313-11240	IRGC 128020	CR 157-392-4::IRGC 39247-2	indx	India
IRIS-313-10899	IRGC 128025	DAMNOEUB KHSE SAUT::IRGC 22819-2	ind3	Cambodia
IRIS-313-11193	IRGC 128040	GAHB AWY 2-1::IRGC 36549-2	ind3	Thailand
IRIS-313-10536	IRGC 128041	GAMTI 1-34::IRGC 6479-2	ind2	Tanzania
IRIS-313-11203	IRGC 128044	GOCHIAGARI::IRGC 37086-2	ind2	Bangladesh
IRIS-313-10989	IRGC 128046	GUTTI AKKULLU::IRGC 26850-2	ind2	India
IRIS-313-10694	IRGC 128047	HAJI HARUN 38::IRGC 13827-2	ind3	Malaysia
IRIS-313-11129	IRGC 128051	HAORU::IRGC 33090-2	indx	Myanmar
IRIS-313-10775	IRGC 128056	INDEL::IRGC 17748-2	indx	Indonesia
IRIS-313-11361	IRGC 128067	KALIKALMA::IRGC 45996-2	ind2	India
IRIS-313-11934	IRGC 128071	KANATO::IRGC 75306-2	indx	Philippines
IRIS-313-11204	IRGC 128072	KARTIKHAMA::IRGC 37149-2	indx	Bangladesh
IRIS-313-10575	IRGC 128074	KAYANGYA D 402::IRGC 7927-2	indx	Myanmar
IRIS-313-11090	IRGC 128076	KEO LAI::IRGC 29969-2	ind3	Lao People's Democratic Republic
IRIS-313-10782	IRGC 128078	KETAN NARIS::IRGC 17925-2	ind3	Indonesia
IRIS-313-11363	IRGC 128089	KHEJURTHUPI::IRGC 46137-2	ind2	India
IRIS-313-10929	IRGC 128090	KOLONGI BAO::IRGC 24135-2	ind2	India
IRIS-313-10904	IRGC 128091	KREM KRAHAM::IRGC 22981-2	ind3	Cambodia
IRIS-313-11206	IRGC 128092	KUMRI::IRGC 37182-2	indx	Bangladesh
IRIS-313-10555	IRGC 128098	LUA HUONG T 1::IRGC 7082-2	ind3	Viet Nam
IRIS-313-10907	IRGC 128105	MARECH S V R::IRGC 23011-2	ind3	Cambodia
IRIS-313-11135	IRGC 128108	MAUNG NYO::IRGC 33351-2	ind3	Myanmar
IRIS-313-11339	IRGC 128109	MILAGROSA::IRGC 44634-2	ind2	Philippines
IRIS-313-11341	IRGC 128110	MINDANAO::IRGC 44642-2	ind3	Philippines
IRIS-313-10755	IRGC 128116	NEP BA BONG TO::IRGC 17005-2	ind3	Viet Nam
IRIS-313-11136	IRGC 128117	NGAKWE THETYIN::IRGC 33477-2	admix	Myanmar
IRIS-313-11137	IRGC 128118	NGALONGYI::IRGC 33479-2	indx	Myanmar
IRIS-313-11138	IRGC 128119	NGASEIN THEEDAT (C 30)::IRGC 33504-2	ind3	Myanmar
IRIS-313-11139	IRGC 128120	NWACHI MANINE::IRGC 33531-2	indx	Myanmar
IRIS-313-11140	IRGC 128123	PADAN::IRGC 33544-2	ind3	Myanmar
IRIS-313-11207	IRGC 128126	PAIRJAT::IRGC 37252-2	ind2	Bangladesh
IRIS-313-11208	IRGC 128129	PARIJAT::IRGC 37272-2	indx	Bangladesh
IRIS-313-11235	IRGC 128137	PINILING DANIEL::IRGC 38828-2	indx	Philippines
IRIS-313-11420	IRGC 128138	PISINI::IRGC 50035-2	ind2	India
IRIS-313-11227	IRGC 128154	SADAJIRA 19-317::IRGC 38344-2	ind2	Bangladesh
IRIS-313-11392	IRGC 128156	SA MER::IRGC 48454-2	ind3	Thailand
IRIS-313-11344	IRGC 128157	SAMON::IRGC 44735-2	ind3	Philippines
IRIS-313-10811	IRGC 128160	SEMPOR::IRGC 18761-2	indx	Indonesia
IRIS-313-11142	IRGC 128162	SHWEPULAY::IRGC 33696-2	ind3	Myanmar
IRIS-313-11229	IRGC 128171	STRAW 23-428::IRGC 38416-2	ind2	Bangladesh
IRIS-313-11402	IRGC 128174	SUITE JORA::IRGC 49257-2	indx	Bangladesh
IRIS-313-11199	IRGC 128176	SYNTHETIC SATIVA::IRGC 36842-2	indx	India
IRIS-313-11144	IRGC 128181	TAUNGDI::IRGC 33746-2	indx	Myanmar
IRIS-313-11145	IRGC 128183	THAKADE THEEDAT::IRGC 33772-2	ind3	Myanmar
IRIS-313-12284	IRGC 128200	VARY GONY::IRGC 97308-2	ind2	Madagascar
IRIS-313-11101	IRGC 128202	Y 115::IRGC 30856-2	indx	Liberia
IRIS-313-11754	IRGC 128214	AMBOHIMANDAY::IRGC 68330-1	admix	Madagascar
IRIS-313-10881	IRGC 128223	ARC 12413::IRGC 22044-1	admix	India
IRIS-313-10883	IRGC 128224	ARC 12490::IRGC 22095-1	admix	India
IRIS-313-11890	IRGC 128252	C 722323::IRGC 73147-1	temp	Taiwan
IRIS-313-10449	IRGC 128264	CI 7061::IRGC 968-1	ind1A	China
IRIS-313-10543	IRGC 128281	DODGUI::IRGC 6666-1	aus	India
IRIS-313-12180	IRGC 128323	JHINUWA DHAN::IRGC 88545-1	indx	Nepal
IRIS-313-11793	IRGC 128350	KOMALIOKO::IRGC 69958-1	ind2	Madagascar
IRIS-313-11849	IRGC 128439	PULUT SELEMYAM::IRGC 71820-1	ind3	Malaysia
IRIS-313-11808	IRGC 128444	R 762::IRGC 70531-1	indx	Colombia
IRIS-313-11549	IRGC 128483	TAUNGYA SABA::IRGC 58226-1	indx	Myanmar
IRIS-313-10917	IRGC 128489	T Q QI HAYUQBABA::IRGC 23318-1	indx	Philippines
IRIS-313-11767	IRGC 128496	VARY LAVA DE BOLOGNE::IRGC 69101-1	admix	Madagascar
IRIS-313-10725	IRGC 128518	ERNEST::IRGC 15884-2	indx	Senegal
IRIS-313-11236	IRGC 128523	LIONG ORN::IRGC 38875-2	ind3	0
IRIS-313-8349	IRGC 128535	LATA MONA::IRGC 49333-1	ind2	Bangladesh
IRIS-313-8458	IRGC 131928	ARC 18175::IRGC 42316-1	indx	India
IRIS-313-11674	IRGC 131971	BEUA KAE::IRGC 64221-1	ind3	Thailand
IRIS-313-11757	IRGC 131972	BORIZINA 640::IRGC 68382-1	ind3	Madagascar
IRIS-313-12220	IRGC 131976	CHAO KHIE KHOUAY::IRGC 90968-1	indx	Lao People's Democratic Republic
IRIS-313-11998	IRGC 131980	DAMNOEUB KAUN KHMOM::IRGC 79159-1	ind3	Cambodia
IRIS-313-11988	IRGC 132033	POTOQOIN::IRGC 78677-1	indx	Sierra Leone
IRIS-313-11509	IRGC 132035	PRADOO DAENG::IRGC 55265-1	ind3	Thailand
IRIS-313-11914	IRGC 132252	IB 11::IRGC 74420-2	ind2	Burundi
IRIS-313-11131	IRGC 132254	KALAI::IRGC 33151-2	indx	Myanmar
IRIS-313-11417	IRGC 132256	LAWANGAI::IRGC 49850-2	admix	India
IRIS-313-11393	IRGC 132267	SAWNG RUANG::IRGC 48458-2	ind3	Thailand
IRIS-313-12151	IRGC 132279	DAMNOEUB KRACHAK SESS::IRGC 87380-1	ind3	Cambodia
IRIS-313-11554	IRGC 132291	PA RABICHINA::IRGC 58609-1	ind3	Sierra Leone
IRIS-313-12143	IRGC 132300	SRAU KHGNAERNG::IRGC 87073-1	ind3	Cambodia
IRIS-313-10855	IRGC 132316	ARC 10159::IRGC 20754-2	ind2	India
IRIS-313-12028	IRGC 132328	CHAO BONG::IRGC 80266-2	indx	Lao People's Democratic Republic
IRIS-313-10720	IRGC 132337	HEENDIKWEE::IRGC 15587-2	indx	Sri Lanka
IRIS-313-10797	IRGC 132357	NARUN::IRGC 18320-2	ind3	Indonesia
IRIS-313-12291	IRGC 132358	NGA CHEKH FAT::IRGC 97701-2	indx	Myanmar
IRIS-313-11078	IRGC 132359	NON HAI::IRGC 29636-2	indx	Lao People's Democratic Republic
IRIS-313-10648	IRGC 132364	PREAH SIHANOUK::IRGC 11328-2	ind3	Cambodia
IRIS-313-11346	IRGC 132371	WAGWAG PUTI::IRGC 44804-2	ind1B	Philippines
IRIS-313-11813	IRGC 132372	ZERO::IRGC 70707-2	ind3	Kenya
IRIS-313-11542	IRGC 132402	KHAO KUM PAR::IRGC 57966-1	admix	Myanmar
IRIS-313-11925	IRGC 132415	SAWK GAM MAH::IRGC 75159-1	ind3	Thailand
IRIS-313-10768	IRGC 132423	GADABUNG (GUNDIL)::IRGC 17569-2	ind3	Indonesia
IRIS-313-10985	IRGC 132424	GOBOL SAIL (BALAM)::IRGC 26624-2	ind2	Bangladesh
IRIS-313-11551	IRGC 135566	FELEGBASEH::IRGC 58443-1	ind3	Sierra Leone
IRIS-313-12000	IRGC 135569	LAANG::IRGC 79258-1	ind3	Cambodia

## Sheet: Supplementary Table S2
Supplementary Table S2. Best linear unbiased prediction of the yield and yield realted traits phenotyped in a multi-environment trial
Trait	Location	20WS					21WS
							Mean (SD)
			Random		H2 (%)	GAM (%)		Random		H2 (%)	GAM (%)
		Mean	Genotype Variance	Residual Variance				Genotype Variance	Residual Variance
DTF (days)	IGKV	96.59	73.02	24.8	86.57	16.96	100.3	134.12	23.72	92.53	22.88
	ISAH	92.79	68.49	27.26	84.62	16.9	93.08	65.093	9.57	93.71	17.28
	ISARC	107.8	217.23	22.25	95.53	27.53	114.1	409.27	24.28	97.36	36.04
PH (cm)	IGKV	115	455	99.56	90.92	36.43	132.5	558.36	79.14	93.92	35.6
	ISAH	127.5	348.56	29.47	96.28	37.25	130	533.62	82.3	93.42	36.07
	ISARC	120.8	488.31	83.01	92.8	36.3	134.8	624	121.4	91.84	36.58
PL (cm)	IGKV	24.37	2.49	4.198	56.5	10.03	24.51	3.05	3.132	68.08	12.11
	ISAH	20.75	2.198	2.591	65.01	11.87	24.51	3.76	2.46	77	13.94
	ISARC	24.37	5.396	1.564	88.31	18.45	25.41	7.793	2.067	89.2	21.37
NPT	IGKV	7.965	2.163	1.43	76.79	33.33	7.28	0.676	1.115	57.04	19.19
	ISAH	8	2.905	1.638	79.52	39.14	7.5	1.69	1.269	74.47	30.75
	ISARC	6.466	1.54	1.53	68.82	32.9	7	1.49	1.44	69.47	29.13
GY (kg/ha)	IGKV	1531	423223	302124	75.42	76.017	2943	529642	391586	74.7608	44.0459
	ISAH	3081.5	1753999	1498348	71.94	75.0934	3726	937159	734420	73.6465	45.9311
	ISARC	2184	720506	554033	74.01	68.97	2355	1013822	630416	77.8855	77.7294
†DTF: Day to 50% flowering; NPT: Number of productive tillers; PH: Plant height; PL: Panicle length; GY: Grain yield

## Sheet: Supplementary Table S3
Supplementary Table S3. QTNs identified from all the environments for yield and related traits using ML-GWAS
Trait	Chromosome	SNP_ID1	SNP_ID2	Position_1	Position_2	Distance	Environment (Season/Location)	QTNeffect	LOD_score	Pvalue	Type	PVE
DTF	1	4805898	4796732	4805898	4796732	9166	WS2021	3.7144	6.3475	7.192	Stable	1.7087
DTF	1	13474300	13515922	13474300	13515922	41622	WS2021	0.9904	3.3397	4.0558	Stable	0.2392
DTF	1	14013375	14057442	14013375	14057442	44067	IGKV	1.4644	3.3298	4.0453	Consistent	0.9115
DTF	1	22543377	22543377	22543377	22543377	0	ISARC	6.0294	10.4928	11.4411	Consistent	2.8219
DTF	1	42301791	42346001	42301791	42346001	44210	WS2020	1.0244	3.6438	4.377	Stable	1.952
DTF	1	42446607	42446607	42446607	42446607	0	ISARC	-2.1509	3.272	3.9841	Consistent	1.0719
DTF	1	42704537	42703913	42704537	42703913	624	ISARC	1.9547	3.1629	3.8684	Consistent	0.9937
DTF	1	42704537	42751775	42704537	42751775	47238	WS2021	1.9547	3.1629	3.8684	Stable	0.9937
DTF	2	50679766	50658948	7408843	7388025	20818	ISARC	-2.5309	4.5517	5.329	Consistent	0.9918
DTF	3	82540850	82540850	3332677	3332677	0	WS2021	2.6522	3.7499	4.4887	Stable	0.4598
DTF	3	82664675	82654038	3456502	3445865	10637	ISARC	-2.4445	3.56	4.2886	Consistent	0.3906
DTF	3	82827264	82874943	3619091	3666770	47679	WS2021	-3.2406	4.7094	5.4935	Stable	1.1921
DTF	3	82874943	82874943	3666770	3666770	0	IGKV	-0.586	3.0277	3.7247	Consistent	1.6564
DTF	3	86117810	86122462	6909637	6914289	4652	WS2021	-2.6684	3.7868	4.5275	Stable	1.8326
DTF	3	114811086	114808295	35602913	35600122	2791	WS2021	-0.9218	4.8833	5.6747	Stable	1.4571
DTF	4	117464309	117508799	1842317	1886807	44490	WS2020	1.2063	5.922	6.7524	Stable	2.7989
DTF	5	158338324	158353332	7213638	7228646	15008	ISARC	3.2758	9.7697	10.7031	Consistent	1.7089
DTF	5	158353332	158334081	7228646	7209395	19251	WS2020	-4.3649	4.2694	5.0339	Stable	2.2081
DTF	5	158372904	158353332	7248218	7228646	19572	ISARC	-3.3414	13.4121	14.4118	Consistent	2.8551
DTF	5	158556659	158556659	7431973	7431973	0	WS2021	-5.4266	4.5465	5.3235	Stable	1.4894
DTF	6	183988099	183992261	2904979	2909141	4162	WS2021	1.5065	5.6312	6.4513	Stable	2.658
DTF	6	183988099	183996860	2904979	2913740	8761	ISARC	4.7013	13.2228	14.2195	Consistent	2.658
DTF	6	183988099	183988099	2904979	2904979	0	WS2021	4.7013	13.2228	14.2195	Stable	2.658
DTF	6	183988099	183992261	2904979	2909141	4162	WS2021	4.7013	13.2228	14.2195	Stable	2.658
DTF	6	184158838	184158838	3075718	3075718	0	WS2021	-2.1551	3.6034	4.3344	Stable	4.3993
DTF	6	191178710	191226449	10095590	10143329	47739	WS2020	5.1023	3.2644	3.976	Stable	2.6721
DTF	6	202099594	202080777	21016474	20997657	18817	ISARC	3.7729	5.3262	6.1351	Consistent	3.2411
DTF	6	202102954	202080777	21019834	20997657	22177	ISARC	6.3127	5.2114	6.0159	Consistent	2.335
DTF	6	203415581	203436410	22332461	22353290	20829	WS2020	3.3021	3.9372	4.6856	Stable	1.1919
DTF	6	203415581	203449483	22332461	22366363	33902	WS2020	3.3021	3.9372	4.6856	Stable	1.1919
DTF	6	203415581	203444281	22332461	22361161	28700	WS2020	3.3021	3.9372	4.6856	Stable	1.1919
DTF	6	211859570	211876806	30776450	30793686	17236	ISAH	0.9391	4.9387	5.7323	Consistent	1.3083
DTF	6	211874255	211859570	30791135	30776450	14685	WS2021	-2.4685	6.0128	6.8463	Stable	1.4734
DTF	7	214189806	214201749	1857899	1869842	11943	WS2021	3.8513	8.382	9.2836	Stable	2.3295
DTF	7	214201749	214230045	1869842	1898138	28296	IGKV	3.2676	8.1977	9.0947	Consistent	4.198
DTF	7	233144159	233137892	20812252	20805985	6267	WS2021	2.5559	8.0632	8.9568	Stable	1.6609
DTF	7	233144159	233158101	20812252	20826194	13942	WS2021	2.5559	8.0632	8.9568	Stable	1.6609
DTF	7	233144159	233102425	20812252	20770518	41734	WS2021	2.5559	8.0632	8.9568	Stable	1.6609
DTF	7	233664930	233690974	21333023	21359067	26044	ISARC	4.2852	5.7163	6.5395	Consistent	4.0111
DTF	7	233664930	233706000	21333023	21374093	41070	ISARC	4.2852	5.7163	6.5395	Consistent	4.0111
DTF	7	233680495	233690974	21348588	21359067	10479	ISARC	2.6895	5.9034	6.7331	Consistent	1.7055
DTF	7	233680495	233706000	21348588	21374093	25505	ISARC	2.6895	5.9034	6.7331	Consistent	1.7055
DTF	7	234268587	234223297	21936680	21891390	45290	IGKV	2.2024	4.1426	4.9011	Consistent	1.4662
DTF	8	259710217	259749359	17680689	17719831	39142	WS2020	-1.4963	3.8089	4.5508	Stable	0.495
DTF	8	259753660	259710217	17724132	17680689	43443	ISARC	-4.0926	5.209	6.0134	Consistent	1.9582
DTF	8	259753660	259749359	17724132	17719831	4301	WS2020	-3.478	7.2783	8.1508	Stable	1.9582
DTF	8	259753660	259753660	17724132	17724132	0	ISARC	-4.0926	5.209	6.0134	Consistent	1.9582
DTF	8	266921248	266898258	24891720	24868730	22990	WS2021	4.7926	3.9745	4.7248	Stable	2.7862
DTF	8	266921248	266937256	24891720	24907728	16008	WS2021	4.7926	3.9745	4.7248	Stable	2.7862
DTF	9	292934575	292972561	22462025	22500011	37986	ISARC	5.5447	4.0874	4.8432	Consistent	1.5321
DTF	10	294003032	294004069	517762	518799	1037	WS2021	4.5471	6.0529	6.8877	Stable	1.8962
DTF	10	295593076	295554881	2107806	2069611	38195	WS2021	2.4585	6.3159	7.1594	Stable	0.838
DTF	10	297534673	297534673	4049403	4049403	0	WS2020	-3.3252	7.3883	8.2639	Stable	2.7224
DTF	10	304189993	304219696	10704723	10734426	29703	IGKV	-2.121	4.5554	5.3328	Consistent	2.3561
DTF	10	305334318	305307716	11849048	11822446	26602	WS2020	1.4437	3.9868	4.7377	Stable	0.7315
DTF	10	312144956	312184576	18659686	18699306	39620	ISARC	-5.068	7.307	8.1803	Consistent	6.3227
DTF	10	313271326	313271326	19786056	19786056	0	WS2020	1.9836	3.9191	4.6666	Stable	1.6222
DTF	10	313271326	313271326	19786056	19786056	0	ISARC	2.461	7.2699	8.1422	Consistent	1.6222
DTF	10	313271326	313269151	19786056	19783881	2175	WS2021	2.461	7.2699	8.1422	Stable	1.6222
DTF	11	325652564	325644894	8960007	8952337	7670	WS2021	1.5679	3.7653	4.5049	Stable	0.6318
DTF	11	325652564	325645350	8960007	8952793	7214	WS2021	1.5679	3.7653	4.5049	Stable	0.6318
DTF	11	325652564	325648735	8960007	8956178	3829	WS2021	1.5679	3.7653	4.5049	Stable	0.6318
DTF	11	337840804	337839344	21148247	21146787	1460	WS2020	-2.5508	7.7765	8.6627	Stable	2.6628
DTF	11	341638880	341641000	24946323	24948443	2120	WS2020	4.8809	4.3993	5.1698	Stable	2.5085
DTF	11	345538990	345548644	28846433	28856087	9654	ISAH	1.3389	3.6086	4.3398	Consistent	1.0151
DTF	12	364630207	364602477	18916544	18888814	27730	WS2021	8.584	3.0401	3.7379	Stable	1.0148
NPT	1	41705848	41711808	41705848	41711808	5960	IGKV	-0.0752	5.7748	6.6001	Consistent	2.0915
NPT	2	63981954	64019787	20711031	20748864	37833	ISAH	-0.1979	3.5264	4.2531	Consistent	2.9019
NPT	2	64022368	63981954	20751445	20711031	40414	WS2021	-0.2153	7.797	8.6837	Stable	2.6308
NPT	2	67475048	67524030	24204125	24253107	48982	WS2021	0.2531	9.9021	10.8383	Stable	3.7134
NPT	2	67475048	67488768	24204125	24217845	13720	ISARC	0.2531	9.9021	10.8383	Consistent	3.7134
NPT	2	67475048	67489795	24204125	24218872	14747	WS2021	0.2531	9.9021	10.8383	Stable	3.7134
NPT	2	67475048	67494057	24204125	24223134	19009	ISARC	0.2531	9.9021	10.8383	Consistent	3.7134
NPT	2	67489795	67538334	24218872	24267411	48539	WS2021	0.1699	4.5043	5.2795	Stable	2.4527
NPT	2	67524030	67557780	24253107	24286857	33750	WS2021	0.1996	4.2568	5.0207	Stable	2.2424
NPT	2	67524030	67538334	24253107	24267411	14304	WS2021	0.1996	4.2568	5.0207	Stable	2.2424
NPT	3	89938112	89938112	10729939	10729939	0	ISARC	-0.2453	4.6945	5.478	Consistent	2.3899
NPT	3	94766882	94719121	15558709	15510948	47761	WS2021	0.1659	5.9882	6.8208	Stable	2.0446
NPT	4	138112760	138133818	22490768	22511826	21058	WS2021	0.2203	5.0264	5.8236	Stable	2.4851
NPT	4	138755490	138783576	23133498	23161584	28086	WS2020	-0.204	3.9558	4.7052	Stable	1.5423
NPT	4	138796455	138783576	23174463	23161584	12879	WS2020	0.2915	7.9852	8.8768	Stable	3.4154
NPT	5	167950121	167922152	16825435	16797466	27969	WS2020	-0.1937	3.6462	4.3795	Stable	1.8064
NPT	6	187949315	187977004	6866195	6893884	27689	ISAH	0.2268	6.9993	7.8638	Consistent	2.9386
NPT	6	192316727	192315993	11233607	11232873	734	WS2021	-0.2508	7.9869	8.8786	Stable	2.3013
NPT	6	204922206	204951639	23839086	23868519	29433	WS2020	-0.0892	3.03	3.7272	Stable	0.44
NPT	6	204951592	204951639	23868472	23868519	47	WS2020	-0.1547	4.8321	5.6214	Stable	1.1272
NPT	6	208133709	208133709	27050589	27050589	0	WS2020	0.1866	5.6799	6.5018	Stable	1.4825
NPT	6	211453313	211487873	30370193	30404753	34560	ISARC	-0.1741	3.4734	4.1972	Consistent	0.8457
NPT	8	251817018	251819427	9787490	9789899	2409	WS2021	-0.2606	5.4827	6.2974	Stable	3.7214
NPT	9	279524264	279508860	9051714	9036310	15404	WS2021	-0.1971	5.4189	6.2313	Stable	2.2782
NPT	9	280601256	280633795	10128706	10161245	32539	WS2021	-0.1283	4.1413	4.8998	Stable	1.0724
NPT	9	280853279	280836996	10380729	10364446	16283	WS2021	0.2504	4.0922	4.8483	Stable	4.1903
NPT	10	297532213	297487901	4046943	4002631	44312	ISARC	-0.1982	3.3685	4.0863	Consistent	1.2955
NPT	10	297532213	297482770	4046943	3997500	49443	ISARC	-0.1982	3.3685	4.0863	Consistent	1.2955
NPT	10	313292189	313271326	19806919	19786056	20863	WS2021	0.2583	3.3835	4.1021	Stable	3.8135
NPT	11	338700013	338720149	22007456	22027592	20136	IGKV	-0.1184	9.1195	10.0386	Consistent	5.3872
NPT	11	339691068	339689202	22998511	22996645	1866	ISARC	-0.1495	5.2741	6.081	Consistent	1.6225
NPT	11	339936732	339932916	23244175	23240359	3816	ISAH	0.1499	3.18	3.8865	Consistent	1.1356
NPT	11	341622612	341598599	24930055	24906042	24013	ISARC	0.1792	4.9809	5.7763	Consistent	1.432
NPT	12	358692340	358721296	12978677	13007633	28956	IGKV	-0.1386	6.4939	7.3431	Consistent	4.0227
NPT	12	369732251	369726858	24018588	24013195	5393	IGKV	-0.0601	5.2969	6.1047	Consistent	1.3446
NPT	12	369735392	369726858	24021729	24013195	8534	IGKV	-0.17	7.0716	7.9382	Consistent	6.3816
NPT	12	369740360	369726858	24026697	24013195	13502	IGKV	-0.0917	7.1192	7.9872	Consistent	0.4151
PH	1	1413631	1414781	1413631	1414781	1150	ISARC	-3.24	3.658	4.3919	Consistent	1.8526
PH	1	4848393	4848393	4848393	4848393	0	IGKV	-4.9309	4.1268	4.8846	Consistent	3.1183
PH	1	18325263	18325263	18325263	18325263	0	WS2021	2.9569	4.2229	4.9852	Stable	1.4184
PH	1	20996888	20987337	20996888	20987337	9551	ISARC	5.0202	6.1086	6.9453	Consistent	4.4697
PH	1	22989988	22975824	22989988	22975824	14164	WS2020	-2.832	9.5218	10.4499	Stable	1.9279
PH	1	22992382	22975824	22992382	22975824	16558	WS2020	-2.3156	5.8647	6.6931	Stable	1.3255
PH	1	38538838	38538838	38538838	38538838	0	WS2020	7.491	11.5749	12.5437	Stable	11.8897
PH	1	38538838	38538838	38538838	38538838	0	WS2020	8.3545	11.7374	12.7091	Stable	11.8897
PH	1	38538838	38538838	38538838	38538838	0	WS2020	8.3545	11.7374	12.7091	Stable	11.8897
PH	1	38538838	38538838	38538838	38538838	0	ISAH	11.328	16.3903	17.4322	Consistent	11.8897
PH	1	39637502	39620806	39637502	39620806	16696	ISARC	2.7751	4.0508	4.8049	Consistent	1.525
PH	1	41094757	41094757	41094757	41094757	0	WS2021	3.1347	3.7534	4.4924	Stable	2.9605
PH	1	41094757	41111473	41094757	41111473	16716	WS2021	3.1347	3.7534	4.4924	Stable	2.9605
PH	2	49426202	49448424	6155279	6177501	22222	WS2020	3.7298	5.4562	6.2699	Stable	3.2507
PH	2	49426202	49426202	6155279	6155279	0	ISARC	3.4286	3.0696	3.7693	Consistent	3.2507
PH	2	50096371	50138576	6825448	6867653	42205	IGKV	-3.839	3.9686	4.7186	Consistent	2.5912
PH	2	67657118	67677546	24386195	24406623	20428	WS2021	-3.1157	3.2647	3.9764	Stable	0.8212
PH	2	67752216	67784735	24481293	24513812	32519	WS2020	-6.3211	4.8851	5.6765	Stable	2.086
PH	2	71243623	71243623	27972700	27972700	0	WS2021	-4.5304	6.296	7.1388	Stable	1.2667
PH	3	82669735	82670689	3461562	3462516	954	WS2020	9.6959	3.8823	4.6279	Stable	1.609
PH	3	85450105	85462902	6241932	6254729	12797	WS2020	-1.6146	3.1863	3.8932	Stable	0.4882
PH	3	93771035	93773064	14562862	14564891	2029	WS2021	-4.6962	3.1126	3.815	Stable	1.91
PH	3	100989672	100989672	21781499	21781499	0	ISAH	-2.0777	3.0603	3.7594	Consistent	2.3672
PH	4	118088313	118095977	2466321	2473985	7664	WS2020	3.1146	6.7658	7.6234	Stable	2.6054
PH	4	118088313	118088313	2466321	2466321	0	WS2020	3.1146	6.7658	7.6234	Stable	2.6054
PH	4	120289917	120278508	4667925	4656516	11409	WS2020	6.4596	4.0357	4.7891	Stable	1.969
PH	4	120289917	120316082	4667925	4694090	26165	WS2020	6.4596	4.0357	4.7891	Stable	1.969
PH	4	147145377	147143588	31523385	31521596	1789	WS2020	4.1787	8.1313	9.0267	Stable	2.3441
PH	4	150947678	150916132	35325686	35294140	31546	WS2021	14.0719	6.9327	7.7952	Stable	5.3187
PH	5	151877274	151877274	752588	752588	0	WS2021	-4.9148	7.8782	8.767	Stable	5.3717
PH	5	156448595	156448595	5323909	5323909	0	WS2021	5.9248	4.9252	5.7183	Stable	1.5043
PH	5	167032564	167045532	15907878	15920846	12968	WS2020	-8.9239	7.4553	8.3328	Stable	3.5561
PH	6	181910900	181937288	827780	854168	26388	WS2021	3.4743	3.3842	4.1029	Stable	2.0854
PH	6	181937288	181941162	854168	858042	3874	ISAH	-3.3054	5.7358	6.5597	Consistent	0.8484
PH	6	181937288	181945685	854168	862565	8397	ISAH	-3.3054	5.7358	6.5597	Consistent	0.8484
PH	6	182001342	182049047	918222	965927	47705	WS2020	2.969	5.4285	6.2412	Stable	2.0524
PH	6	182009469	182049047	926349	965927	39578	WS2020	2.554	6.629	7.4824	Stable	1.4949
PH	6	211290581	211290581	30207461	30207461	0	WS2020	-4.7751	4.8343	5.6237	Stable	1.351
PH	7	229793512	229799929	17461605	17468022	6417	ISARC	-2.9069	5.4606	6.2745	Consistent	1.3101
PH	7	229799929	229789343	17468022	17457436	10586	WS2020	-3.0092	6.7685	7.6261	Stable	1.9893
PH	8	242167214	242128773	137686	99245	38441	IGKV	1.6138	3.3309	4.0465	Consistent	0.5341
PH	8	242176935	242128773	147407	99245	48162	WS2020	-2.084	3.3946	4.1139	Stable	0.911
PH	8	242304606	242261673	275078	232145	42933	WS2020	-1.5915	3.4984	4.2236	Stable	0.5828
PH	8	258788309	258818652	16758781	16789124	30343	WS2021	3.189	6.9477	7.8107	Stable	2.3435
PH	8	260216622	260194392	18187094	18164864	22230	WS2020	-2.2903	5.4156	6.2278	Stable	1.3039
PH	8	260243012	260194392	18213484	18164864	48620	WS2020	1.632	3.3498	4.0665	Stable	0.6615
PH	9	276984995	277028501	6512445	6555951	43506	WS2020	2.7573	5.3123	6.1206	Stable	1.5082
PH	9	284576658	284576343	14104108	14103793	315	ISAH	-6.1255	4.7786	5.5656	Consistent	4.8549
PH	10	311104171	311099466	17618901	17614196	4705	WS2020	11.4917	6.7598	7.6172	Stable	3.1697
PH	11	321068553	321102693	4375996	4410136	34140	IGKV	-8.4953	4.4554	5.2284	Consistent	6.4007
PH	11	322132907	322132907	5440350	5440350	0	IGKV	2.3801	4.0829	4.8385	Consistent	0.6179
PH	11	322132907	322132907	5440350	5440350	0	WS2021	2.0232	4.0628	4.8175	Stable	0.6179
PH	11	322228353	322190979	5535796	5498422	37374	ISAH	1.8843	3.9733	4.7235	Consistent	0.8008
PH	11	322234460	322190979	5541903	5498422	43481	ISAH	-2.1465	3.4343	4.1558	Consistent	0.6163
PH	11	327366997	327403398	10674440	10710841	36401	WS2020	-3.0259	6.3955	7.2415	Stable	2.0009
PH	11	335131056	335134665	18438499	18442108	3609	ISARC	5.4518	3.9944	4.7457	Consistent	1.3438
PH	11	336068787	336084192	19376230	19391635	15405	ISARC	4.8097	3.2534	3.9644	Consistent	2.9615
PH	11	336073379	336084192	19380822	19391635	10813	ISARC	4.6815	4.3403	5.1081	Consistent	3.2561
PH	11	337932124	337886342	21239567	21193785	45782	WS2020	2.7094	6.0266	6.8605	Stable	1.2325
PH	11	339897413	339947306	23204856	23254749	49893	WS2021	3.8936	3.8133	4.5554	Stable	2.211
PH	11	339897413	339852561	23204856	23160004	44852	WS2021	3.8936	3.8133	4.5554	Stable	2.211
PH	11	339897413	339864519	23204856	23171962	32894	WS2021	3.8936	3.8133	4.5554	Stable	2.211
PH	11	339979095	339982649	23286538	23290092	3554	WS2020	-2.9626	4.9773	5.7725	Stable	1.7801
PH	12	352906574	352932564	7192911	7218901	25990	ISARC	-7.9124	3.9219	4.6696	Consistent	1.8052
PH	12	367489942	367489942	21776279	21776279	0	WS2021	3.9201	4.6753	5.4579	Stable	1.7891
PL	1	3440283	3442424	3440283	3442424	2141	WS2020	0.198	3.065	3.7644	Stable	0.2659
PL	1	5524273	5524273	5524273	5524273	0	IGKV	0.345	5.3918	6.2031	Consistent	4.6013
PL	1	22675053	22675452	22675053	22675452	399	WS2021	-0.3339	3.966	4.7159	Stable	1.5409
PL	2	49220898	49212358	5949975	5941435	8540	ISARC	-0.2632	3.0569	3.7558	Consistent	0.7828
PL	2	59775260	59752727	16504337	16481804	22533	ISAH	0.3324	8.9901	9.9062	Consistent	1.9998
PL	2	63810980	63806921	20540057	20535998	4059	ISARC	-0.3879	5.3254	6.1342	Consistent	1.1219
PL	2	65572879	65531953	22301956	22261030	40926	WS2021	0.3987	6.5918	7.444	Stable	2.0497
PL	2	67820943	67820962	24550020	24550039	19	WS2020	-0.4618	6.8022	7.6608	Stable	2.9325
PL	2	72911779	72911779	29640856	29640856	0	WS2020	-0.474	7.6494	8.5322	Stable	2.4603
PL	2	72942534	72911779	29671611	29640856	30755	WS2020	-0.3999	4.452	5.2249	Stable	1.8452
PL	3	113920749	113874575	34712576	34666402	46174	WS2020	0.2199	9.2411	10.163	Stable	3.6725
PL	3	113960442	113972318	34752269	34764145	11876	WS2020	0.3335	4.2385	5.0016	Stable	1.8473
PL	3	113960442	113920749	34752269	34712576	39693	WS2020	0.3335	4.2385	5.0016	Stable	1.8473
PL	3	114080412	114101799	34872239	34893626	21387	WS2020	-0.8462	4.6755	5.4581	Stable	3.3266
PL	3	114080412	114080412	34872239	34872239	0	ISARC	-0.2679	5.1077	5.9081	Consistent	3.3266
PL	3	114105927	114080412	34897754	34872239	25515	ISARC	-0.4261	5.0755	5.8746	Consistent	2.7382
PL	3	114808295	114776869	35600122	35568696	31426	WS2021	0.4456	3.436	4.1576	Stable	0.8348
PL	4	140000760	140050399	24378768	24428407	49639	WS2020	0.4747	6.3954	7.2414	Stable	6.1527
PL	5	177835580	177805567	26710894	26680881	30013	ISAH	-0.1688	3.2973	4.0109	Consistent	1.0225
PL	7	215714824	215714945	3382917	3383038	121	WS2021	0.4082	4.7487	5.5345	Stable	2.3651
PL	7	229823303	229785641	17491396	17453734	37662	ISARC	-0.4619	9.508	10.4358	Consistent	2.9677
PL	8	246175498	246201313	4145970	4171785	25815	WS2021	0.4392	5.5114	6.3272	Stable	2.7156
PL	8	247407123	247407981	5377595	5378453	858	WS2021	-0.4363	6.9368	7.7995	Stable	2.7842
PL	8	247407981	247360554	5378453	5331026	47427	ISAH	-0.7153	8.3327	9.2331	Consistent	5.4602
PL	8	269132280	269119988	27102752	27090460	12292	ISAH	-0.3881	6.3721	7.2174	Consistent	2.6352
PL	10	311581360	311565426	18096090	18080156	15934	IGKV	-0.1395	3.2912	4.0044	Consistent	1.2621
PL	11	339690407	339728839	22997850	23036282	38432	WS2020	0.1074	3.0669	3.7664	Stable	0.4581
PL	11	339691389	339728839	22998832	23036282	37450	WS2020	0.1462	4.1692	4.929	Stable	1.1695
PL	11	342649960	342625642	25957403	25933085	24318	ISAH	0.2754	3.8015	4.543	Consistent	0.8667
PL	11	342658886	342625642	25966329	25933085	33244	ISAH	-0.4329	8.647	9.5551	Consistent	3.0609
PL	11	344058261	344102766	27365704	27410209	44505	ISAH	-0.3427	7.4111	8.2873	Consistent	2.7981
PL	11	344102766	344086160	27410209	27393603	16606	WS2020	-0.2676	4.0546	4.8089	Stable	1.7714
PL	11	344102766	344110630	27410209	27418073	7864	WS2020	-0.2676	4.0546	4.8089	Stable	1.7714
PL	12	360594415	360580839	14880752	14867176	13576	ISAH	-0.2339	4.2495	5.0131	Consistent	2.0779
PL	12	361485240	361529353	15771577	15815690	44113	ISARC	-0.2863	3.6951	4.431	Consistent	0.9354
GY	1	5400398	5400398	5400398	5400398	0	ISARC	-192.424	5.2896	6.0971	Consistent	1.7261
GY	1	39435740	39471836	39435740	39471836	36096	WS2021	-94.6285	3.891	4.6371	Stable	0.6875
GY	1	41994665	42042103	41994665	42042103	47438	IGKV	-127.134	4.9474	5.7414	Consistent	2.4525
GY	2	43465620	43469773	194697	198850	4153	WS2021	-155.854	6.1954	7.035	Stable	2.2178
GY	2	43465620	43467875	194697	196952	2255	ISAH	-155.854	6.1954	7.035	Consistent	2.2178
GY	2	48922670	48932728	5651747	5661805	10058	WS2021	154.962	5.607	6.4263	Stable	2.0879
GY	2	48932728	48903290	5661805	5632367	29438	IGKV	162.099	5.2791	6.0862	Consistent	2.4472
GY	2	51668308	51653620	8397385	8382697	14688	WS2021	-330.123	4.9975	5.7935	Stable	5.3286
GY	2	52029890	51998276	8758967	8727353	31614	ISARC	-268.876	4.805	5.5931	Consistent	2.9217
GY	2	64344050	64321292	21073127	21050369	22758	WS2020	112.527	4.0698	4.8248	Stable	1.1636
GY	2	68116921	68132084	24845998	24861161	15163	ISAH	231.761	8.068	8.9618	Consistent	3.1088
GY	2	68146801	68132084	24875878	24861161	14717	WS2020	-249.274	4.9354	5.7289	Stable	1.3262
GY	2	78258879	78290130	34987956	35019207	31251	WS2021	269.199	12.5713	13.5574	Stable	6.1007
GY	3	87359701	87393613	8151528	8185440	33912	WS2021	-299.036	8.6227	9.5302	Stable	7.0849
GY	3	104178224	104180085	24970051	24971912	1861	WS2020	-106.274	3.6102	4.3415	Stable	0.7702
GY	6	185892976	185853614	4809856	4770494	39362	ISARC	95.6547	4.5147	5.2904	Consistent	1.2457
GY	6	201796168	201765928	20713048	20682808	30240	IGKV	-306.891	13.5371	14.5387	Consistent	12.8663
GY	8	249784060	249743595	7754532	7714067	40465	ISARC	169.505	3.2163	3.9251	Consistent	1.0453
GY	8	267620750	267660474	25591222	25630946	39724	IGKV	297.722	5.091	5.8908	Consistent	3.0474
GY	9	277568655	277543707	7096105	7071157	24948	WS2020	130.179	3.6041	4.3351	Stable	2.2021
GY	9	277761221	277801730	7288671	7329180	40509	IGKV	456.946	5.6714	6.493	Consistent	3.6691
GY	9	277799811	277761221	7327261	7288671	38590	WS2021	-149.894	6.0796	6.9153	Stable	2.3715
GY	9	280770472	280772904	10297922	10300354	2432	WS2021	199.073	6.5679	7.4194	Stable	3.7734
GY	9	292550830	292551943	22078280	22079393	1113	ISARC	137.065	3.9549	4.7042	Consistent	1.9987
GY	11	322317550	322336156	5624993	5643599	18606	WS2021	-134.043	5.0317	5.8291	Stable	1.7416
GY	11	324597400	324588373	7904843	7895816	9027	ISARC	-139.522	5.864	6.6924	Consistent	2.598
GY	11	330587318	330549523	13894761	13856966	37795	WS2021	130.29	3.2997	4.0134	Stable	1.5148
GY	11	332809455	332811704	16116898	16119147	2249	WS2021	-355	11.8157	12.7888	Stable	13.6428
GY	11	338925996	338944032	22233439	22251475	18036	WS2020	-245.101	7.5736	8.4543	Stable	3.0518
GY	11	338925996	338940868	22233439	22248311	14872	WS2020	-245.101	7.5736	8.4543	Stable	3.0518
GY	11	338949231	338944032	22256674	22251475	5199	WS2020	179.424	7.1955	8.0657	Stable	2.5893
GY	11	338949231	338940868	22256674	22248311	8363	WS2020	179.424	7.1955	8.0657	Stable	2.5893
GY	11	338949231	338925996	22256674	22233439	23235	WS2020	179.424	7.1955	8.0657	Stable	2.5893
GY	11	338950129	338944032	22257572	22251475	6097	WS2020	149.886	5.5626	6.3803	Stable	1.1527
GY	11	338950129	338940868	22257572	22248311	9261	WS2020	149.886	5.5626	6.3803	Stable	1.1527
GY	11	338950129	338925996	22257572	22233439	24133	WS2020	149.886	5.5626	6.3803	Stable	1.1527
GY	11	343278452	343277821	26585895	26585264	631	WS2021	142.849	3.9137	4.6609	Stable	1.2248
GY	12	352865044	352835788	7151381	7122125	29256	WS2020	-197.071	3.5881	4.3182	Stable	3.6904
GY	12	362304147	362261901	16590484	16548238	42246	ISAH	-209.56	4.5491	5.3263	Consistent	4.2242
GY	12	363350045	363364176	17636382	17650513	14131	WS2020	-555.349	9.954	10.8913	Stable	5.1057
†DTF: Day to 50% flowering; NPT: Number of productive tillers; PH: Plant height (cms) ; PL: Panicle length (cms) ; GY: Grain yield in kg per hectare

## Sheet: Supplementary Table S4
Supplementary Table S4. QTNs and Associated loci identified from all the environments for yield and related traits using ML-GWAS
Trait	PeakSNP						Environment	QTN	Associated loci	Range
	SNP ID	Chromosome	Position	QTNeffect	LOD_score	Pvalue
DTF	45941559	2	2670636	1.4497	8.5729	9.4792	ISAH_WS2021	DTF2.1	hsDTF2	2.620369-10.113781
DTF	49353766	2	6082843	1.188	8.4308	9.3336	IGKV_WS2021	DTF2.2
DTF	50679766	2	7408843	-2.5309	4.5517	5.329	ISARC_WS2021	DTF2.3
DTF	53236588	2	9965665	-1.7092	4.2175	4.9796	IGKV_WS2021	DTF2.4
DTF	53344175	2	10073252	-1.162	7.1057	7.9733	ISAH_WS2021	DTF2.5
DTF	277085797	9	6613247	-1.3698	5.4808	6.2955	ISAH_WS2021	DTF9.1	hsDTF9	6.56879-8.125409
DTF	278553783	9	8081233	0.8041	3.0876	3.7884	ISAH_WS2021	DTF9.2
NPT	22615405	1	22615405	-0.4157	4.0168	4.7692	ISARC_WS2021	NPT1.1	hsNPT1.1	22.566747-29.80697
NPT	22943877	1	22943877	0.1765	5.264	6.0705	ISARC_WS2021	NPT1.2
NPT	25699766	1	25699766	-0.1191	5.6288	6.4489	IGKV_WS2021	NPT1.3
NPT	29765877	1	29765877	0.3792	11.1344	12.0951	ISAH_WS2021	NPT1.4
NPT	41705848	1	41705848	-0.0752	5.7748	6.6001	IGKV_WS2021	NPT1.5	hsNPT1.2	41.665416-41.744666
NPT	41711808	1	41711808	0.195	4.4506	5.2234	IGKV_WS2021	NPT1.6
NPT	64492176	2	21221253	0.3817	3.1011	3.8027	ISARC_WS2021	NPT2.1	hsNPT2	21.170529-24.819818
NPT	67114714	2	23843791	0.542	7.9415	8.832	ISARC_WS2021	NPT2.2
NPT	67524030	2	24253107	0.1996	4.2568	5.0207	ISAH_WS2021	NPT2.3
NPT	67784939	2	24514016	0.3208	8.237	9.135	ISARC_WS2021	NPT2.4
NPT	68038472	2	24767549	-0.1065	12.0228	12.9996	IGKV_WS2021	NPT2.5
NPT	137255444	4	21633452	-0.4076	6.3632	7.2082	ISARC_WS2021	NPT4.1	hsNPT4	21.59164-22.171089
NPT	137747346	4	22125354	-0.32	5.7361	6.56	ISARC_WS2021	NPT4.2
NPT	174897864	5	23773178	-0.671	4.1079	4.8648	ISAH_WS2021	NPT5.1	hsNPT5	23.728502-28.948384
NPT	178147366	5	27022680	-0.2718	5.2761	6.0831	ISARC_WS2021	NPT5.2
NPT	179271153	5	28146467	-0.0842	4.6982	5.4818	IGKV_WS2021	NPT5.3
NPT	180025260	5	28900574	-0.6165	5.5642	6.3819	ISARC_WS2021	NPT5.4
NPT	186790725	6	5707605	-0.3298	6.1285	6.9658	ISAH_WS2021	NPT6.1	hsNPT6	5.65785-6.097662
NPT	187134195	6	6051075	-0.1739	5.0798	5.8791	ISAH_WS2021	NPT6.2
NPT	341622612	11	24930055	0.1792	4.9809	5.7763	ISARC_WS2021	NPT11.1	hsNPT11	24.879854-27.85894
NPT	343655202	11	26962645	-0.2368	9.2055	10.1266	ISARC_WS2021	NPT11.2
NPT	344527911	11	27835354	-0.2006	5.1587	5.9611	ISARC_WS2021	NPT11.3
NPT	363108602	12	17394939	-0.1564	3.6756	4.4105	IGKV_WS2021	NPT12.1	hsNPT12	17.354834-24.252367
NPT	365505477	12	19791814	0.1904	6.8588	7.7191	ISARC_WS2021	NPT12.2
NPT	368415904	12	22702241	-0.2946	5.6838	6.5058	ISAH_WS2021	NPT12.3
NPT	369915222	12	24201559	-0.174	5.1401	5.9418	ISARC_WS2021	NPT12.4
PH	25678386	1	25678386	-1.7889	3.7651	4.5047	IGKV_WS2021	PH1.1	hsPH1.1	25.579802-30.254956
PH	30153574	1	30153574	4.4392	4.5244	5.3005	IGKV_WS2021	PH1.2
PH	38538838	1	38538838	11.328	16.3903	17.4322	ISAH_WS2021	PH1.3	hsPH1.2	38.436842-39.736817
PH	39032129	1	39032129	11.7674	17.8297	18.8894	IGKV_WS2021	PH1.4
PH	39637502	1	39637502	2.7751	4.0508	4.8049	ISARC_WS2021	PH1.5
PH	47721028	2	4450105	3.4177	6.6369	7.4905	IGKV_WS2021	PH2.1	hsPH2.1	4.350872-5.933079
PH	49106457	2	5835534	6.4068	5.2792	6.0863	IGKV_WS2021	PH2.2
PH	67784735	2	24513812	-3.755	3.2745	3.9867	IGKV_WS2021	PH2.3	hsPH2.2	24.432051-27.421961
PH	67963433	2	24692510	2.5555	4.7259	5.5107	IGKV_WS2021	PH2.4
PH	70591401	2	27320478	-9.5508	20.5013	21.5906	ISAH_WS2021	PH2.5
PH	118088313	4	2466321	2.9655	4.9481	5.7421	ISAH_WS2021	PH4.1	hsPH4	2.367636-4.65273
PH	120176543	4	4554551	-4.0699	5.304	6.112	ISAH_WS2021	PH4.2
PH	267327602	8	25298074	5.583	7.9692	8.8604	IGKV_WS2021	PH8.1	hsPH8	25.194583-25.87768
PH	267804009	8	25774481	5.6733	3.3593	4.0765	IGKV_WS2021	PH8.2
PH	336068787	11	19376230	4.8097	3.2534	3.9644	ISARC_WS2021	PH11.1	hsPH11	19.277557-23.705921
PH	337840686	11	21148129	2.7477	4.2343	4.9972	IGKV_WS2021	PH11.2
PH	339864519	11	23171962	2.5003	3.0108	3.7067	ISAH_WS2021	PH11.3
PH	339974235	11	23281678	5.8888	8.4347	9.3376	IGKV_WS2021	PH11.4
PH	340307301	11	23614744	3.4857	5.6493	6.4701	ISARC_WS2021	PH11.5
PL	63810980	2	20540057	-0.3879	5.3254	6.1342	ISARC_WS2021	PL2.1	hsPL2.1	20.491113-24.960258
PL	65531953	2	22261030	0.3214	3.4552	4.1779	ISAH_WS2021	PL2.2
PL	67820962	2	24550039	-0.1262	4.4908	5.2654	ISAH_WS2021	PL2.3
PL	68180684	2	24909761	-0.4713	8.6835	9.5925	ISARC_WS2021	PL2.4
PL	72659733	2	29388810	-0.1991	3.1537	3.8586	IGKV_WS2021	PL2.5	hsPL2.2	29.341254-32.913772
PL	72911779	2	29640856	-0.2355	6.1142	6.9511	IGKV_WS2021	PL2.6
PL	73132939	2	29862016	-0.7426	6.3906	7.2365	IGKV_WS2021	PL2.7
PL	73261239	2	29990316	0.3145	4.7323	5.5174	IGKV_WS2021	PL2.8
PL	76145191	2	32874268	-0.237	4.7721	5.5589	IGKV_WS2021	PL2.9
PL	93625753	3	14417580	-0.3226	5.4484	6.2619	ISAH_WS2021	PL3.1	hsPL3	14.35933-17.607751
PL	96772228	3	17564055	0.3092	9.755	10.6881	ISAH_WS2021	PL3.2
PL	119168990	4	3546998	0.5131	8.5233	9.4284	ISAH_WS2021	PL4.1	hsPL4	3.529914-6.911487
PL	122485344	4	6863352	0.2682	7.6713	8.5547	ISAH_WS2021	PL4.2
PL	335465943	11	18773386	0.7955	11.7042	12.6753	ISARC_WS2021	PL11.1	hsPL11	18.726813-23.913312
PL	336104294	11	19411737	0.5116	6.6907	7.546	ISARC_WS2021	PL11.2
PL	338631417	11	21938860	-0.2434	5.3355	6.1447	ISAH_WS2021	PL11.3
PL	339728839	11	23036282	-0.1873	6.2885	7.1311	IGKV_WS2021	PL11.4
PL	340554362	11	23861805	0.1408	4.8468	5.6367	IGKV_WS2021	PL11.5
GY	51998276	2	8727353	-195.779	3.1545	3.8595	ISARC_WS2021	GY2.1	hsGY2	8.694019-9.130848
GY	52029890	2	8758967	-268.876	4.805	5.5931	ISARC_WS2021	GY2.2
GY	52364128	2	9093205	92.0575	3.9076	4.6545	IGKV_WS2021	GY2.3
GY	83950867	3	4742694	56.0994	3.1237	3.8268	IGKV_WS2021	GY3.1	hsGY3	4.692613-9.035337
GY	88195422	3	8987249	160.638	5.5109	6.3267	IGKV_WS2021	GY3.2
GY	178573962	5	27449276	146.208	6.8822	7.7432	IGKV_WS2021	GY5.1	hsGY5	27.412286-29.135068
GY	180207448	5	29082762	136.339	7.847	8.735	IGKV_WS2021	GY5.2
GY	186105763	6	5022643	105.425	4.1554	4.9145	ISARC_WS2021	GY6.1	hsGY6	4.974618-6.572727
GY	187461063	6	6377943	-236.837	4.2538	5.0176	ISAH_WS2021	GY6.2
GY	187607868	6	6524748	-150.56	3.4609	4.184	ISARC_WS2021	GY6.3
GY	323053916	11	6361359	186.27	5.0601	5.8586	IGKV_WS2021	GY11.1	hsGY11	6.315122-7.935798
GY	323071000	11	6378443	213.55	8.4657	9.3694	IGKV_WS2021	GY11.2
GY	323158304	11	6465747	124.344	4.9362	5.7297	IGKV_WS2021	GY11.3
GY	324588373	11	7895816	-104.67	6.1435	6.9813	ISARC_WS2021	GY11.4
GY	359700218	12	13986555	-171.666	5.1959	5.9998	ISAH_WS2021	GY12.1	hsGY12	13.936541-23.981787
GY	361619951	12	15906288	315.547	7.3247	8.1985	ISAH_WS2021	GY12.2
GY	362304147	12	16590484	-209.56	4.5491	5.3263	ISAH_WS2021	GY12.3
GY	363282809	12	17569146	-136.866	3.7297	4.4674	ISARC_WS2021	GY12.4
GY	364584836	12	18871173	-262.787	9.5216	10.4497	ISAH_WS2021	GY12.5
GY	369670140	12	23956477	157.958	8.9128	9.8272	IGKV_WS2021	GY12.6
†DTF: Day to 50% flowering; NPT: Number of productive tillers; PH: Plant height (cms) ; PL: Panicle length (cms) ; GY: Grain yield in kg per hectare

## Sheet: Supplementary Table S5
Supplementary Table S5. Candidate genes from all the environments for yield and related traits
Trait	MSU ID	Chromosome	start	stop	strand	QTN	Description	MTA_type	Environment (Location/ Season)	CGSNL.Gene.Symbol	Gene.symbol.synonym.s.	CGSNL.Gene.Name	Gene.name.synonym.s.	Protein.Name	Trait.Class	RAP.ID	Locate.cM.	Gene.Ontology	Trait.Ontology	Plant.Ontology
DTF	LOC_Os01g09420	1	4796155	4798479	-	4805898 , 4796732	expressed 20protein	genic	WS21
DTF	LOC_Os01g09430	1	4800247	4802179	+	4805898 , 4796732	expressed 20protein	nongenic	WS21
DTF	LOC_Os01g09440	1	4807985	4808500	+	4805898 , 4796732	expressed 20protein	nongenic	WS21
DTF	LOC_Os01g23940	1	13467990	13469759	+	13474300 , 13515922	expressed 20protein	nongenic	WS21
DTF	LOC_Os01g23960	1	13475815	13482656	-	13474300,13515922	retrotransposon 20protein 2C 20putative 2C 20Ty3-gypsy 20subclass 2C 20expressed	nongenic	WS21
DTF	LOC_Os01g24880	1	14012515	14019465	+	14013375,14057442	zinc 20finger 2C 20C3HC4 20type 20domain 20containing 20protein 2C 20expressed	genic	IGKV	VIP2	IPI1, RIP1, OsVIP2, OsIPI1, OsRIP1, OsRING103, RING103	_	Putative VIP2 protein, IPA1 INTERACTING PROTEIN1, IPA1 INTERACTING PROTEIN 1, ROD1 interacting protein 1, RING-type E3 ubiquitin ligase 103		Reproductive organ - Pollination, fertilization, fertility - Male sterility, Tolerance and resistance - Disease resistance, Character as QTL - Yield and productivity, Biochemical character	Os01g0350900		GO:0000209 - protein polyubiquitination, GO:0005634 - nucleus, GO:0008270 - zinc ion binding, GO:0050832 - defense response to fungus, GO:0004842 - ubiquitin-protein ligase activity	TO:0006032 - panicle size, TO:0000017 - anatomy and morphology related trait, TO:0000437 - male sterility, TO:0000074 - blast disease, TO:0000255 - sheath blight disease resistance, TO:0000346 - tiller number, TO:0000371 - yield trait	PO:0025034 - leaf
DTF	LOC_Os01g24940	1	14047801	14054910	+	14013375,14057442	poly 20synthetase 202-A 2C 20putative 2C 20expressed	nongenic	IGKV	PARP2A	OsPARP2A, OsPARP2, PARP2	POLY(ADP-RIBOSE) POLYMERASE 2A	poly(ADP-ribose) polymerase 2A, Poly ADP-ribose polymerase-2A, Poly ADP-ribose polymerase-2	POLY(ADP-RIBOSE) POLYMERASE 2A	Biochemical character	Os01g0351200		GO:0006471 - protein amino acid ADP-ribosylation, GO:0003677 - DNA binding, GO:0003910 - DNA ligase (ATP) activity, GO:0003950 - NAD+ ADP-ribosyltransferase activity, GO:0005634 - nucleus, GO:0005737 - cytoplasm, GO:0006273 - lagging strand elongation, GO:0051103 - DNA ligation during DNA repair
DTF	LOC_Os01g24950	1	14059572	14064905	+	14013375,14057442	exocyst 20complex 20component 206 2C 20putative 2C 20expressed	nongenic	IGKV
DTF	LOC_Os01g39970	1	22538988	22542228	+	22543377	protein 20kinase 20domain 20containing 20protein 2C 20putative 2C 20expressed	nongenic	ISARC	RLCK39	OsRLCK39, OsUSP4, USP4	RECEPTOR-LIKE CYTOPLASMIC KINASE 39	Receptor-like Cytoplasmic Kinase 39, universal stress protein 4	RECEPTOR-LIKE CYTOPLASMIC KINASE 39	Reproductive organ - panicle, Seed	Os01g0581400		GO:0004674 - protein serine/threonine kinase activity, GO:0005524 - ATP binding, GO:0006950 - response to stress, GO:0010229 - inflorescence development, GO:0048316 - seed development	TO:0000621 - inflorescence development trait, TO:0000653 - seed development trait	PO:0001083 - inflorescence development stage , PO:0009010 - seed , PO:0009049 - inflorescence , PO:0001170 - seed development stage
DTF	LOC_Os01g39980	1	22543693	22545461	+	22543377	hypothetical 20protein	nongenic	ISARC
DTF	LOC_Os01g72930	1	42297255	42300253	+	42301791 , 42346001	pentatricopeptide 2C 20putative 2C 20expressed	nongenic	WS20	_	EMP5, Os EMP5, OsEMP5	_	Empty Pericarp5		Seed	Os01g0959600
DTF	LOC_Os01g72940	1	42303454	42311177	-	42301791 , 42346001	phosphatidylserine 20decarboxylase 2C 20putative 2C 20expressed	nongenic	WS20
DTF	LOC_Os01g72990	1	42336217	42349399	-	42301791 , 42346001	expressed 20protein	genic	WS20
DTF	LOC_Os01g73220	1	42446001	42447654	+	42446607	peroxidase 20precursor 2C 20putative 2C 20expressed	genic	ISARC	_	prx23	_	class III peroxidase 23		Tolerance and resistance - Disease resistance, Tolerance and resistance - Stress tolerance, Biochemical character			GO:0004601 - peroxidase activity, GO:0006979 - response to oxidative stress, GO:0020037 - heme binding, GO:0046872 - metal ion binding
DTF	LOC_Os01g73700	1	42699971	42701323	-	42704537,42703913	RCLEA2 20- 20Root 20cap 20and 20Late 20embryogenesis 20related 20family 20protein 20precursor 2C 20putative 2C 20expressed	nongenic	ISARC
DTF	LOC_Os01g73710	1	42704282	42705375	-	42704537,42703913	RCLEA3 20- 20Root 20cap 20and 20Late 20embryogenesis 20related 20family 20protein 20precursor 2C 20putative 2C 20expressed	nongenic	ISARC
DTF	LOC_Os01g73790	1	42738667	42742174	-	42704537 , 42751775	NAD 20dependent 20epimerase 2Fdehydratase 20family 20protein 2C 20putative 2C 20expressed	nongenic	WS21
DTF	LOC_Os01g73800	1	42752981	42757186	-	42704537 , 42751775	expressed 20protein	nongenic	WS21
DTF	LOC_Os02g05450	2	2620369	2626310	+	45941559	Homeobox 20domain 20containing 20protein 2C 20expressed	QTN	ISAH_WS2020	_		_	homeodomain protein		Seed, Other	Os02g0147800		GO:0009733 - response to auxin stimulus, GO:0008270 - zinc ion binding, GO:0005634 - nucleus, GO:0003700 - transcription factor activity, GO:0045893 - positive regulation of transcription, DNA-dependent, GO:0043565 - sequence-specific DNA binding	TO:0000653 - seed development trait, TO:0000620 - embryo development trait
DTF	LOC_Os02g05460	2	2631740	2632111	-	45941559	hypothetical 20protein	QTN	ISAH_WS2020
DTF	LOC_Os02g05470	2	2638417	2642111	+	45941559	CCT 20motif 20family 20protein 2C 20expressed	QTN	ISAH_WS2020	CMF3	OsCCT03, CCT03, OsCCT3, CCT3, OsCMF3	CCT MOTIF FAMILY GENE 3	CCT domain-containing gene 3, CCT (CO, CO-LIKE and TOC1) domain protein 3, CCT domain protein 3, CCT MOTIF FAMILY (CMF) gene 3	CCT MOTIF FAMILY PROTEIN 3	Vegetative organ - Culm, Reproductive organ - Heading date, Reproductive organ - Spikelet, flower, glume, awn, Vegetative organ - Leaf, Coloration - Chlorophyll	Os02g0148000		GO:0048576 - positive regulation of short-day photoperiodism, flowering, GO:0009648 - photoperiodism, GO:0048578 - positive regulation of long-day photoperiodism, flowering, GO:0007623 - circadian rhythm	TO:0000137 - days to heading, TO:0000229 - photoperiod sensitivity, TO:0000207 - plant height, TO:0000456 - spikelet number, TO:0000495 - chlorophyll content, TO:0000326 - leaf color, TO:0002616 - flowering time
DTF	LOC_Os02g05480	2	2642977	2646360	-	45941559	CGMC_MAPKCMGC_2_SLT2y_ERK.1 20- 20CGMC 20includes 20CDA 2C 20MAPK 2C 20GSK3 2C 20and 20CLKC 20kinases 2C 20expressed	QTN	ISAH_WS2020	MAP3	OsMAPK33, OsMPK14, OsMAPK2, OsMAP3, OsMAPK14, OsMPK3, MAPK33, MPK14, MAPK2, MAPK14, MPK3, OsMAPK3, MAPK3	_	MAP kinase 14, MAP kinase 3	_	Seed - Physiological traits - Dormancy, Biochemical character, Tolerance and resistance - Stress tolerance, Tolerance and resistance - Insect resistance	Os02g0148100		GO:0004707 - MAP kinase activity, GO:2000033 - regulation of seed dormancy, GO:0005524 - ATP binding, GO:0009814 - defense response, incompatible interaction, GO:0000165 - MAPKKK cascade, GO:0042542 - response to hydrogen peroxide, GO:0009737 - response to abscisic acid stimulus, GO:0009611 - response to wounding, GO:0050832 - defense response to fungus, GO:0009409 - response to cold, GO:0009753 …	TO:0000172 - jasmonic acid sensitivity, TO:0000303 - cold tolerance, TO:0000253 - seed dormancy, TO:0000615 - abscisic acid sensitivity, TO:0000074 - blast disease, TO:0000424 - brown planthopper resistance, TO:0000401 - plant growth hormone sensitivity
DTF	LOC_Os02g05490	2	2656065	2659128	+	45941559	expressed 20protein	QTN	ISAH_WS2020
DTF	LOC_Os02g05500	2	2659672	2663048	+	45941559	pyridoxamine 205 27-phosphate 20oxidase 20family 20protein 2C 20putative 2C 20expressed	QTN	ISAH_WS2020
DTF	LOC_Os02g05510	2	2664370	2668170	+	45941559	GATA 20transcription 20factor 2025 2C 20putative 2C 20expressed	QTN	ISAH_WS2020	GATA17	OsTIFY2a, TIFY2a, OsCCT04, OsCCT4, CCT04, CCT4, OsGATA17, OsGATA17a, OsGATA17b	GATA TRANSCRIPTION FACTOR 17	TIFY GENE 2A, TIFY-DOMAIN PROTEIN 2A, CCT domain-containing gene 4, CCT (CO, CO-LIKE and TOC1) domain protein 4, CCT domain protein 4, GATA transcription factor 17, GATA factor 17	GATA TRANSCRIPTION FACTOR 17	Other, Tolerance and resistance - Stress tolerance	Os02g0148500		GO:0030154 - cell differentiation, GO:0006366 - transcription from RNA polymerase II promoter, GO:0008270 - zinc ion binding, GO:0005634 - nucleus, GO:0005667 - transcription factor complex, GO:0003682 - chromatin binding, GO:0009737 - response to abscisic acid stimulus, GO:0045944 - positive regulation of transcription from RNA polymerase II promoter, GO:0007623 - circadian rhythm, GO:0009414 - …	TO:0000615 - abscisic acid sensitivity, TO:0000276 - drought tolerance, TO:0006001 - salt tolerance
DTF	LOC_Os02g05520	2	2668556	2671036	+	45941559	expressed 20protein	QTN	ISAH_WS2020
DTF	LOC_Os02g05530	2	2674126	2676604	+	45941559	expressed 20protein	QTN	ISAH_WS2020
DTF	LOC_Os02g05540	2	2679976	2680529	+	45941559	expressed 20protein	QTN	ISAH_WS2020
DTF	LOC_Os02g05550	2	2681214	2685181	+	45941559	retrotransposon 20protein 2C 20putative 2C 20Ty1-copia 20subclass 2C 20expressed	QTN	ISAH_WS2020
DTF	LOC_Os02g11720	2	6038222	6039636	-	49353766	lipase 2C 20putative 2C 20expressed	QTN	IGKV_WS2020
DTF	LOC_Os02g11740	2	6057100	6060286	+	49353766	plastidic 20ATP 2FADP-transporter 2C 20putative 2C 20expressed	QTN	IGKV_WS2020	NTT2	OsNTT2	PLASTIDIC NUCLEOTIDE TRANSPORT PROTEIN 2		PLASTIDIC NUCLEOTIDE TRANSPORT PROTEIN 2	Biochemical character	Os02g0208100		GO:0005471 - ATP:ADP antiporter activity
DTF	LOC_Os02g11750	2	6062276	6066769	+	49353766	RNA 20recognition 20motif 20containing 20protein 2C 20putative 2C 20expressed	QTN	IGKV_WS2020
DTF	LOC_Os02g11760	2	6069031	6075807	+	49353766	pleiotropic 20drug 20resistance 20protein 2C 20putative 2C 20expressed	QTN	IGKV_WS2020	PDR7	OsABCG39, OsPDR7	PLEIOTROPIC DRUG RESISTANCE 7	ABC transporter superfamily ABCG subgroup member 39, pleiotropic drug resistance 7	PLEIOTROPIC DRUG RESISTANCE 7	Biochemical character	Os02g0208300		GO:0016021 - integral to membrane, GO:0006200 - ATP catabolic process, GO:0006810 - transport, GO:0016887 - ATPase activity, GO:0005524 - ATP binding
DTF	LOC_Os02g11770	2	6078178	6079147	-	49353766	expressed 20protein	QTN	IGKV_WS2020	CDT4	OsCDT4	CADMIUM TOLERANT 4	sativa DcCDT1 homologue 4, cadmium tolerance 4	CDT4	Tolerance and resistance - Stress tolerance	Os02g0208500		GO:0010044 - response to aluminum ion, GO:0046686 - response to cadmium ion	TO:0000354 - aluminum sensitivity
DTF	LOC_Os02g11780	2	6083116	6089638	+	49353766	transcription 20factor 20S-II 2C 20central 20domain 20containing 20protein 2C 20expressed	QTN	IGKV_WS2020
DTF	LOC_Os02g11790	2	6092981	6095907	-	49353766	OsFBK4 20- 20F-box 20domain 20and 20kelch 20repeat 20containing 20protein 2C 20expressed	QTN	IGKV_WS2020	_	OsKMD1, OsFbox074, OsFbox74, Os_F0323, OsFBK4, FBK4	_	KISS ME DEADLY1, KISS ME DEADLY 1, F-box protein 74, F-box-type E3 ubiquitin ligase K4			Os02g0208700
DTF	LOC_Os02g11810	2	6106543	6106830	-	49353766	conserved 20hypothetical 20protein	QTN	IGKV_WS2020
DTF	LOC_Os02g11820	2	6110092	6118738	+	49353766	GTPase-activating 20protein 2C 20putative 2C 20expressed	QTN	IGKV_WS2020	_		_	calcium-binding repeat protein		Seed	Os02g0208900		GO:0032312 - regulation of ARF GTPase activity, GO:0008060 - ARF GTPase activator activity, GO:0008270 - zinc ion binding	TO:0000620 - embryo development trait, TO:0000653 - seed development trait
DTF	LOC_Os02g11830	2	6119039	6129217	-	49353766	coatomer 20subunit 20beta 2C 20putative 2C 20expressed	QTN	IGKV_WS2020
DTF	LOC_Os02g11840	2	6131748	6138158	-	49353766	coatomer 20subunit 20beta-2 2C 20putative 2C 20expressed	QTN	IGKV_WS2020
DTF	LOC_Os02g13710	2	7365220	7366415	+	50679766	ethylene-responsive 20transcription 20factor 20TINY 2C 20putative 2C 20expressed	QTN	ISARC_WS2021	ERF38	OsERF#038, OsERF038, OsERF38, AP2/EREBP#082, AP2/EREBP82, OsDREB4-1	ETHYLENE RESPONSE FACTOR 38	ethylene response factor 38, APETALA2/ethylene-responsive element binding protein 82	ETHYLENE RESPONSE FACTOR 38	Other	Os02g0231000		GO:0006351 - transcription, DNA-dependent, GO:0003700 - transcription factor activity, GO:0005634 - nucleus, GO:0003677 - DNA binding
DTF	LOC_Os02g13730	2	7387035	7390209	-	50679766,50658948	retrotransposon 20protein 2C 20putative 2C 20unclassified 2C 20expressed	genic, QTN	ISARC, ISARC_WS2021
DTF	LOC_Os02g13740	2	7396380	7396817	+	50679766	expressed 20protein	QTN	ISARC_WS2021
DTF	LOC_Os02g13750	2	7402713	7410877	+	50679766,50658948	retrotransposon 20protein 2C 20putative 2C 20unclassified 2C 20expressed	genic, QTN	ISARC, ISARC_WS2021
DTF	LOC_Os02g13770	2	7431305	7433852	+	50679766	transposon 20protein 2C 20putative 2C 20CACTA 2C 20En 2FSpm 20sub-class 2C 20expressed	QTN	ISARC_WS2021
DTF	LOC_Os02g13780	2	7434644	7438310	-	50679766	receptor-like 20protein 20kinase 202 20precursor 2C 20putative 2C 20expressed	QTN	ISARC_WS2021
DTF	LOC_Os02g13785	2	7439852	7443657	+	50679766	expressed 20protein	QTN	ISARC_WS2021
DTF	LOC_Os02g13790	2	7449739	7450231	+	50679766	expressed 20protein	QTN	ISARC_WS2021
DTF	LOC_Os02g17292	2	9912536	9919784	-	53236588	retrotransposon 20protein 2C 20putative 2C 20unclassified 2C 20expressed	QTN	IGKV_WS2021
DTF	LOC_Os02g17304	2	9922465	9928349	-	53236588	resistance 20protein 2C 20putative 2C 20expressed	QTN	IGKV_WS2021	XO2	Xo2, OsXo2	_			Tolerance and resistance - Disease resistance	Os02g0272900		GO:0051707 - response to other organism, GO:0042742 - defense response to bacterium, GO:0043531 - ADP binding, GO:0006952 - defense response	TO:0000203 - bacterial leaf streak disease resistance
DTF	LOC_Os02g17320	2	9928818	9937418	-	53236588	uridine 2Fcytidine 20kinase-like 201 2C 20putative 2C 20expressed	QTN	IGKV_WS2021
DTF	LOC_Os02g17330	2	9950654	9954960	-	53236588	aminotransferase 20domain 20containing 20protein 2C 20putative 2C 20expressed	QTN	IGKV_WS2021
DTF	LOC_Os02g17340	2	9961173	9963171	-	53236588	expressed 20protein	QTN	IGKV_WS2021
DTF	LOC_Os02g17350	2	9972642	9978099	+	53236588	VHS 20and 20GAT 20domain 20containing 20protein 2C 20expressed	QTN	IGKV_WS2021
DTF	LOC_Os02g17360	2	9981497	9985907	-	53236588	PPR 20repeat 20domain 20containing 20protein 2C 20putative 2C 20expressed	QTN	IGKV_WS2021
DTF	LOC_Os02g17370	2	9988864	9990643	-	53236588	expressed 20protein	QTN	IGKV_WS2021
DTF	LOC_Os02g17380	2	9993963	9998257	+	53236588	EMB1303 2C 20putative 2C 20expressed	QTN	IGKV_WS2021	RF2	Rf2 (Rfx), Rfx, Rf2	RESTORATION OF FERTILITY 2	Pollen fertility restoration2, Pollen fertility restoration 2, Pollen fertility restoration-2		Reproductive organ - Pollination, fertilization, fertility - Fertility restoration	Os02g0274000	65	GO:0007275 - multicellular organismal development	TO:0000308 - male fertility restoration trait	PO:0009066 - anther
DTF	LOC_Os02g17390	2	10001464	10010228	+	53236588	3-hydroxyacyl-CoA 20dehydrogenase 2C 20putative 2C 20expressed	QTN	IGKV_WS2021	AIM1	MFP, OsAIM, OsCHD, CHD	ABNORMAL INFLORESCENCE MERISTEM1	multifunctional protein, peroxisomal multifunctional protein, ABNORMAL INFLORESCENCE MERISTEM 1, cinnamoyl-CoA hydratase-dehydrogenase		Biochemical character, Vegetative organ - Root	Os02g0274100		GO:0008692 - 3-hydroxybutyryl-CoA epimerase activity, GO:0006635 - fatty acid beta-oxidation, GO:0009908 - flower development, GO:0009695 - jasmonic acid biosynthetic process, GO:0009845 - seed germination, GO:0005618 - cell wall, GO:0009507 - chloroplast, GO:0048364 - root development, GO:0009697 - salicylic acid biosynthetic process, GO:0000166 - nucleotide binding, GO:0008017 - microtubule bin…	TO:0000656 - root development trait, TO:0000227 - root length, TO:0000605 - hydrogen peroxide content	PO:0001031 - 4 root elongation stage
DTF	LOC_Os02g17400	2	10010588	10013470	-	53236588	leucine 20rich 20repeat 20protein 2C 20putative 2C 20expressed	QTN	IGKV_WS2021
DTF	LOC_Os02g17430	2	10026052	10031777	-	53344175	retrotransposon 20protein 2C 20putative 2C 20unclassified 2C 20expressed	QTN	ISAH_WS2020
DTF	LOC_Os02g17440	2	10034584	10038862	-	53344175	retrotransposon 20protein 2C 20putative 2C 20unclassified 2C 20expressed	QTN	ISAH_WS2020
DTF	LOC_Os02g17450	2	10040214	10042761	+	53344175	retrotransposon 20protein 2C 20putative 2C 20unclassified 2C 20expressed	QTN	ISAH_WS2020
DTF	LOC_Os02g17460	2	10042478	10049191	-	53344175	tesmin 2FTSO1-like 20CXC 20domain 20containing 20protein 2C 20expressed	QTN	ISAH_WS2020
DTF	LOC_Os02g17470	2	10051105	10056497	+	53344175	RNA-binding 20protein-related 2C 20putative 2C 20expressed	QTN	ISAH_WS2020
DTF	LOC_Os02g17480	2	10066678	10067448	-	53344175	expressed 20protein	QTN	ISAH_WS2020
DTF	LOC_Os02g17490	2	10070460	10071109	+	53344175	retrotransposon 2C 20putative 2C 20centromere-specific 2C 20expressed	QTN	ISAH_WS2020
DTF	LOC_Os02g17500	2	10074581	10081512	+	53344175	transporter 20family 20protein 2C 20putative 2C 20expressed	QTN	ISAH_WS2020	GMST1	OsGMST1, OspGlcT2, pGlcT2	GOLGI LOCALIZED MONOSACCHARIDE TRANSPORTER 1	Golgi localized monosaccharide transporter 1, PLASTIDIC GLUCOSE TRANSLOCATOR 2, pGlcT protein 2, monosaccharide transporter pGlcT2	GOLGI LOCALIZED MONOSACCHARIDE TRANSPORTER 1	Biochemical character, Tolerance and resistance - Stress tolerance	Os02g0274900		GO:0015749 - monosaccharide transport, GO:0016021 - integral to membrane, GO:0015149 - hexose transmembrane transporter activity, GO:0015293 - symporter activity, GO:0005794 - Golgi apparatus, GO:0016020 - membrane, GO:0009651 - response to salt stress, GO:0008643 - carbohydrate transport	TO:0006001 - salt tolerance, TO:0000333 - sugar content, TO:0006006 - monosaccharide content
DTF	LOC_Os02g17520	2	10084266	10087922	+	53344175	cytochrome 20c-type 20biogenesis 20protein 20ccmH 20precursor 2C 20putative 2C 20expressed	QTN	ISAH_WS2020
DTF	LOC_Os02g17534	2	10088210	10095193	-	53344175	xyloglucan 20fucosyltransferase 2C 20putative 2C 20expressed	QTN	ISAH_WS2020
DTF	LOC_Os02g17550	2	10100556	10104503	+	53344175	transposon 20protein 2C 20putative 2C 20unclassified 2C 20expressed	QTN	ISAH_WS2020
DTF	LOC_Os02g17560	2	10105122	10105697	-	53344175	hypothetical 20protein	QTN	ISAH_WS2020
DTF	LOC_Os02g17570	2	10108868	10109932	+	53344175	retrotransposon 20protein 2C 20putative 2C 20unclassified	QTN	ISAH_WS2020
DTF	LOC_Os02g17580	2	10110996	10113781	-	53344175	retrotransposon 20protein 2C 20putative 2C 20unclassified 2C 20expressed	QTN	ISAH_WS2020
DTF	LOC_Os03g06610	3	3323422	3324598	-	82540850	expressed 20protein	nongenic	WS21	EPFL6	OsEPFL6	EPIDERMAL PATTERNING FACTOR-LIKE 6	EPIDERMAL PATTERNING FACTOR-LIKE6, EPF-LIKE 6	EPIDERMAL PATTERNING FACTOR-LIKE 6	Reproductive organ - Spikelet, flower, glume, awn, Reproductive organ - panicle, Seed - Morphological traits - Grain shape, Character as QTL - Yield and productivity, Vegetative organ - Culm, Reproductive organ - Panicle, Mode of branching	Os03g0161600		GO:0010052 - guard cell differentiation, GO:0005576 - extracellular region	TO:0000547 - primary branch number, TO:0000396 - grain yield, TO:0000397 - grain size, TO:0000734 - grain length, TO:0000382 - 1000-seed weight, TO:0000557 - secondary branch number, TO:0000456 - spikelet number, TO:0000207 - plant height	PO:0009049 - inflorescence
DTF	LOC_Os03g06620	3	3338269	3341260	+	82540850	1 2C2-dihydroxy-3-keto-5-methylthiopentene 20dioxygenase 20protein 2C 20putative 2C 20expressed	nongenic	WS21	SIP2A	Sip2A, ARD 2, ARD2, OsARD2, OsARD, IDI1, OsIDI1	SUBMERGENCE-INDUCED PROTEIN 2A	submergence-induced protein 2A, 1, 2-dihydroxy-3-keto-5-methylthiopentene dioxygenase 2, Aci-reductone dioxygenase 2, Submergence-induced protein 2A, acireductone dioxygenase 2, submergence-induced protein2A, aci-reductone-dioxygenase-like protein, Fe-deficiency-induced protein 1	SUBMERGENCE-INDUCED PROTEIN 2A	Tolerance and resistance - Stress tolerance	Os03g0161800		GO:0005506 - iron ion binding, GO:0010309 - acireductone dioxygenase [iron(II)-requiring] activity, GO:0046872 - metal ion binding, GO:0034224 - cellular response to zinc ion starvation, GO:0019509 - methionine salvage, GO:0005634 - nucleus, GO:0005737 - cytoplasm, GO:0010106 - cellular response to iron ion starvation, GO:0016702 - oxidoreductase activity, acting on single donors with incorporati…	TO:0000351 - zinc sensitivity, TO:0000224 - iron sensitivity
DTF	LOC_Os03g06760	3	3435024	3439544	+	82664675,82654038	exocyst 20complex 20component 206 2C 20putative 2C 20expressed	nongenic	ISARC
DTF	LOC_Os03g06780	3	3446999	3447253	-	82664675,82654038	expressed 20protein	nongenic	ISARC
DTF	LOC_Os03g06810	3	3454769	3455359	-	82664675,82654038	expressed 20protein	nongenic	ISARC
DTF, PH	LOC_Os03g06820	3	3458708	3458941	-	82664675,82654038, 82669735 , 82670689	expressed 20protein	nongenic	ISARC, WS20
DTF	LOC_Os03g07080	3	3616607	3622208	+	82827264 , 82874943	endonuclease 2Fexonuclease 2Fphosphatase 20family 20domain 20containing 20protein 2C 20expressed	genic	WS21	CCR4B	OsCCR4b	CARBON CATABOLITE REPRESSOR 4B	Carbon catabolite repressor 4b	CARBON CATABOLITE REPRESSOR 4B		Os03g0166800		GO:0004519 - endonuclease activity, GO:0004527 - exonuclease activity, GO:0000932 - cytoplasmic mRNA processing body
DTF	LOC_Os03g07160	3	3664640	3669942	+	82874943	OsFBK11 20- 20F-box 20domain 20and 20kelch 20repeat 20containing 20protein 2C 20expressed	genic	IGKV, WS21	_	OsFbox129, Os_F0178, OsFBK11, FBK11	_	F-box protein 129, F-box-type E3 ubiquitin ligase K11			Os03g0167800
DTF	LOC_Os03g12850	3	6908146	6909133	+	86117810 , 86122462	expressed 20protein	nongenic	WS21
DTF	LOC_Os03g12860	3	6931709	6933328	+	86117810 , 86122462	homeobox 20associated 20leucine 20zipper 2C 20putative 2C 20expressed	nongenic	WS21	HOX19	Oshox19, OsHox19, OsHDZ12, OsHDZIP12, HDZ12, HDZIP12	HOMEOBOX GENE 19	rice homeobox gene 19, Homeobox-leucine zipper protein HOX19, Homeodomain transcription factor HOX19, HD-ZIP protein HOX19, homeodomain-leucine zipper transcription factor 12, OsHDZIP transcription factor 12	HOMEOBOX-LEUCINE ZIPPER PROTEIN HOX19	Other, Tolerance and resistance - Stress tolerance	Os03g0231000		GO:0009741 - response to brassinosteroid stimulus, GO:0005634 - nucleus, GO:0006350 - transcription, GO:0043565 - sequence-specific DNA binding, GO:0003700 - transcription factor activity, GO:0006355 - regulation of transcription, DNA-dependent, GO:0009651 - response to salt stress	TO:0002677 - brassinosteroid sensitivity, TO:0006001 - salt tolerance
DTF, PL	LOC_Os03g62910	3	35589750	35597745	+	114811086 , 114808295, 114808295 , 114776869	expressed 20protein	nongenic	WS21
DTF, PL	LOC_Os03g62920	3	35600641	35601083	+	114811086 , 114808295, 114808295 , 114776869	expressed 20protein	nongenic	WS21
DTF	LOC_Os03g62950	3	35606522	35607866	-	114811086 , 114808295	expressed 20protein	nongenic	WS21
DTF	LOC_Os04g03990	4	1835462	1839603	-	117464309 , 117508799	3-5 20exonuclease 20domain-containing 20protein 2C 20putative 2C 20expressed	nongenic	WS20
DTF	LOC_Os04g04000	4	1843006	1848258	+	117464309 , 117508799	ECT 20protein 2C 20putative 2C 20expressed	nongenic	WS20
DTF	LOC_Os04g04080	4	1882947	1884718	+	117464309 , 117508799	transposon 20protein 2C 20putative 2C 20CACTA 2C 20En 2FSpm 20sub-class 2C 20expressed	nongenic	WS20
DTF	LOC_Os04g04100	4	1893361	1894905	+	117464309 , 117508799	hypothetical 20protein	nongenic	WS20
DTF	LOC_Os05g12560	5	7207650	7209809	-	158353332 , 158334081	expressed 20protein	genic	WS20
DTF	LOC_Os05g12570	5	7211727	7216703	+	158338324,158353332	NB-ARC 20domain 20containing 20protein 2C 20expressed	genic	ISARC
DTF	LOC_Os05g12590	5	7228258	7228644	+	158372904,158353332	retrotransposon 20protein 2C 20putative 2C 20unclassified	nongenic	ISARC, WS20
DTF	LOC_Os05g12600	5	7231924	7233209	+	158372904,158353332	expressed 20protein	nongenic	ISARC, WS20
DTF	LOC_Os05g12620	5	7242801	7246830	+	158372904,158353332	retrotransposon 2C 20putative 2C 20centromere-specific 2C 20expressed	nongenic	ISARC
DTF	LOC_Os05g12630	5	7249978	7251397	+	158372904,158353332	expressed 20protein	nongenic	ISARC	BURP7	OsBURP07, OsBURP7	BURP DOMAIN-CONTAINING PROTEIN 7	BURP domain-containing protein 7	BURP DOMAIN-CONTAINING PROTEIN 7	Tolerance and resistance - Stress tolerance	Os05g0217700		GO:0001666 - response to hypoxia	TO:0000015 - oxygen sensitivity
DTF	LOC_Os05g13380	5	7424685	7429054	-	158556659	retrotransposon 20protein 2C 20putative 2C 20unclassified 2C 20expressed	nongenic	WS21
DTF	LOC_Os05g13390	5	7432324	7438303	+	158556659	expressed 20protein	nongenic	WS21
DTF	LOC_Os06g06280	6	2902268	2907306	+	183988099,183996860	galactosyltransferase 20family 20protein 2C 20putative 2C 20expressed	genic	ISARC, WS21
DTF	LOC_Os06g06290	6	2908024	2910916	-	183988099,183996860	GDSL-like 20lipase 2Facylhydrolase 2C 20putative 2C 20expressed	nongenic	ISARC	GELP79	OsGELP79	GDSL ESTERASE/LIPASE PROTEIN 79	GDSL esterase/lipase protein 79	GDSL ESTERASE/LIPASE PROTEIN 79	Biochemical character	Os06g0157000		GO:0016788 - hydrolase activity, acting on ester bonds, GO:0006629 - lipid metabolic process
DTF	LOC_Os06g06300	6	2926823	2928474	+	183988099,183996860	osFTL3 20 20FT-Like3 20homologous 20to 20Flowering 20Locus 20T 20 20gene 3B 20contains 20Pfam 20profile 20PF01161 3A 20Phosphatidylethanolamine-binding 20protein 2C 20expressed	nongenic	ISARC	RFT1	FT-L 3, OsFTL3, FTL3, FT-L3, RFT, OsRFT1	RICE FLOWERING-LOCUS T 1	Rice Flowering-locus T 1, RICE FLOWERING LOCUS T 1, FT-like gene 3, RFT		Reproductive organ - Heading date, Character as QTL - Yield and productivity	Os06g0157500		GO:0031210 - phosphatidylcholine binding, GO:0005634 - nucleus, GO:0008429 - phosphatidylethanolamine binding, GO:0005543 - phospholipid binding, GO:0005737 - cytoplasm, GO:0048573 - photoperiodism, flowering, GO:0048510 - regulation of timing of transition from vegetative to reproductive phase, GO:0009737 - response to abscisic acid stimulus, GO:0009416 - response to light stimulus, GO:0009908 -…	TO:0000075 - light sensitivity, TO:0000172 - jasmonic acid sensitivity, TO:0000615 - abscisic acid sensitivity, TO:0000137 - days to heading, TO:0000447 - filled grain number, TO:0000371 - yield trait
DTF	LOC_Os06g06550	6	3074186	3077781	-	184158838	plant 20protein 20of 20unknown 20function 20domain 20containing 20protein 2C 20expressed	genic	WS21
DTF	LOC_Os06g17390	6	10082202	10087094	-	191178710 , 191226449	auxin-independent 20growth 20promoter 20protein 2C 20putative 2C 20expressed	nongenic	WS20
DTF	LOC_Os06g17400	6	10096790	10097167	-	191178710 , 191226449	expressed 20protein	nongenic	WS20
DTF	LOC_Os06g17480	6	10137823	10138875	+	191178710 , 191226449	histone-like 20transcription 20factor 20and 20archaeal 20histone 2C 20putative 2C 20expressed	nongenic	WS20	HAP3D	OsHAP3D, OsEnS-83, OsNF-YB9, NF-YB9, NFYB9, OsLEC1A, LEC1A	HAP3D SUBUNIT OF CCAAT-BOX BINDING COMPLEX	HAP3 subunit D, LEC1-type 3 subunit protein-D, endosperm-specific gene 83, NUCLEAR FACTOR-Y subunit B9, NUCLEAR FACTOR-Y subunit NF-YB9, HAP3 SUBUNIT D, NF-YB subunit 9, NF-YB family 9	HAP3D SUBUNIT OF CCAAT-BOX BINDING COMPLEX	Reproductive organ - Heading date, Tolerance and resistance - Stress tolerance, Reproductive organ - Pollination, fertilization, fertility - Sterility, Reproductive organ - Spikelet, flower, glume, awn, Character as QTL - Plant growth activity, Seed - Physiological traits - Storage substances, Seed - Morphological traits - Grain shape, Seed - Morphological traits - Endosperm, Other	Os06g0285200		GO:0043565 - sequence-specific DNA binding, GO:0048579 - negative regulation of long-day photoperiodism, flowering, GO:0005737 - cytoplasm, GO:0009790 - embryonic development, GO:0006355 - regulation of transcription, DNA-dependent, GO:0005634 - nucleus, GO:0006350 - transcription, GO:0048316 - seed development, GO:0010581 - regulation of starch biosynthetic process, GO:0042127 - regulation of ce…	TO:0000399 - grain thickness, TO:0000137 - days to heading, TO:0000064 - embryo related trait, TO:0000196 - amylose content, TO:0000696 - starch content, TO:0000211 - gel consistency, TO:0000346 - tiller number, TO:0000207 - plant height, TO:0000485 - sterility related trait, TO:0000276 - drought tolerance, TO:0000653 - seed development trait, TO:0000146 - seed length, TO:0000149 - seed width, TO…	PO:0009089 - endosperm , PO:0009009 - plant embryo , PO:0001170 - seed development stage , PO:0000003 - whole plant , PO:0009010 - seed
DTF	LOC_Os06g17490	6	10146841	10149402	+	191178710 , 191226449	expressed 20protein	nongenic	WS20
DTF	LOC_Os06g35960	6	20996264	20998867	-	202102954,202080777	HSF-type 20DNA-binding 20domain 20containing 20protein 2C 20expressed	genic	ISARC	HSFC2B	HSfC2b, OsHsfC2b, OsHsf-16, HSF16, OsHSF16	HEAT STRESS TRANSCRIPTION FACTOR C2B	Heat stress transcription factor C2b, Heat stress transcription factor C-2b, Heat stress transcription factor 16	HEAT STRESS TRANSCRIPTION FACTOR C2b	Tolerance and resistance - Stress tolerance	Os06g0553100		GO:0031667 - response to nutrient levels, GO:0042594 - response to starvation, GO:0016036 - cellular response to phosphate starvation, GO:0009628 - response to abiotic stimulus, GO:0003700 - transcription factor activity, GO:0005634 - nucleus, GO:0006350 - transcription, GO:0006355 - regulation of transcription, DNA-dependent, GO:0006950 - response to stress, GO:0043565 - sequence-specific DNA bi…	TO:0000168 - abiotic stress trait, TO:0000102 - phosphorus sensitivity	PO:0009072 - plant ovary , PO:0009009 - plant embryo , PO:0025034 - leaf , PO:0009089 - endosperm , PO:0020104 - leaf sheath , PO:0009005 - root , PO:0009049 - inflorescence
DTF	LOC_Os06g35980	6	21015459	21015758	+	202102954,202080777	expressed 20protein	nongenic	ISARC
DTF	LOC_Os06g35990	6	21021837	21023686	-	202102954,202080777	expressed 20protein	nongenic	ISARC
DTF	LOC_Os06g37690	6	22331486	22333906	+	203415581 , 203436410	S-locus-like 20receptor 20protein 20kinase 2C 20putative 2C 20expressed	genic	WS20	MAK8	OsMAK8	MEMBRANE-ASSOCIATED KINASE 8	Membrane-associated kinase-8	MEMBRANE-ASSOCIATED KINASE 8	Tolerance and resistance - Stress tolerance, Biochemical character	Os06g0575000		GO:0004675 - transmembrane receptor protein serine/threonine kinase activity, GO:0016021 - integral to membrane, GO:0006468 - protein amino acid phosphorylation, GO:0005524 - ATP binding, GO:0030912 - response to deep water, GO:0002229 - defense response to oomycetes, GO:0042742 - defense response to bacterium, GO:0005886 - plasma membrane, GO:0009413 - response to flooding	TO:0000524 - submergence tolerance	PO:0009030 - carpel , PO:0020094 - plant egg cell
DTF	LOC_Os06g37750	6	22352080	22354770	+	203415581 , 203436410	S-locus-like 20receptor 20protein 20kinase 2C 20putative 2C 20expressed	genic	WS20	SDRLK5	SDRLK-5, OsSDRLK-5, OsSDRLK5	S-DOMAIN RECEPTOR LIKE KINASE 5	S-Domain receptor like kinase-5	S-DOMAIN RECEPTOR LIKE KINASE 5	Tolerance and resistance - Stress tolerance, Biochemical character	Os06g0575400		GO:0006468 - protein amino acid phosphorylation, GO:0030912 - response to deep water, GO:0009413 - response to flooding, GO:0009414 - response to water deprivation, GO:0048544 - recognition of pollen, GO:0004674 - protein serine/threonine kinase activity, GO:0016021 - integral to membrane, GO:0005886 - plasma membrane, GO:0005524 - ATP binding	TO:0000524 - submergence tolerance, TO:0000276 - drought tolerance	PO:0009046 - flower , PO:0009005 - root
DTF	LOC_Os06g37760	6	22356357	22360550	-	203415581 , 203444281	transposon 20protein 2C 20putative 2C 20unclassified 2C 20expressed	nongenic	WS20
DTF	LOC_Os06g37770	6	22361233	22361673	+	203415581 , 203444281	expressed 20protein	nongenic	WS20
DTF	LOC_Os06g37790	6	22364633	22367812	-	203415581 , 203449483	expressed 20protein	genic	WS20
DTF	LOC_Os06g50870	6	30774114	30776635	-	211859570,211876806	DNL 20zinc 20finger 20domain 20containing 20protein 2C 20putative 2C 20expressed	genic	ISAH, WS21	_	OsDNLZ1, DNLZ1	_	DNL type zinc finger domain-containing protein 1			Os06g0724400		GO:0008270 - zinc ion binding
DTF	LOC_Os06g50890	6	30779924	30783639	+	211859570,211876806	RNA 20recognition 20motif 20containing 20protein 2C 20expressed	nongenic	ISAH
DTF	LOC_Os06g50910	6	30797112	30815783	-	211859570,211876806	Phosphatidylinositol 20kinase 20and 20FAT 20containing 20domain 20protein 2C 20putative 2C 20expressed	nongenic	ISAH	ATR	OsATR	ATM-RAD3-RELATED PROTEIN	ATR homolog, ATM-rad3-related protein	ATM-RAD3-RELATED PROTEIN	Reproductive organ - Pollination, fertilization, fertility - Meiosis, Tolerance and resistance - Stress tolerance	Os06g0724700		GO:0046686 - response to cadmium ion, GO:0007049 - cell cycle, GO:0005634 - nucleus, GO:0005524 - ATP binding, GO:0004674 - protein serine/threonine kinase activity, GO:0000724 - double-strand break repair via homologous recombination, GO:0007126 - meiosis, GO:0016301 - kinase activity
DTF	LOC_Os07g04230	7	1856679	1861030	+	214189806 , 214201749	mTERF 20domain 20containing 20protein 2C 20expressed	genic	WS21	_		_	MTERF2 homolog, mitochondrial transcription termination factor 2 homolog		Tolerance and resistance - Stress tolerance	Os07g0134700		GO:0009507 - chloroplast, GO:0006355 - regulation of transcription, DNA-dependent, GO:0006353 - transcription termination, GO:0032502 - developmental process, GO:0009506 - plasmodesma, GO:0009408 - response to heat, GO:0003690 - double-stranded DNA binding	TO:0000259 - heat tolerance	PO:0025034 - leaf
DTF	LOC_Os07g04240	7	1860602	1866556	-	214201749,214230045	succinate 20dehydrogenase 20flavoprotein 20subunit 2Cmitochondrial 20precursor 2C 20putative 2C 20expressed	nongenic	IGKV, WS21	SDH1	sdh1, FP, sdh1-1	SUCCINATE DEHYDROGENASE SUBUNIT 1	SUCCINATE:UBIQUINONE OXIDOREDUCTASE, Succinate dehydrogenase (ubiquinone) flavoprotein subunit, Succinate dehydrogenase subunit 1, Succinate dehydrogenase (ubiquinone) flavoprotein, \Succinate dehydrogenase [ubiquinone] flavoprotein subunit, mitochondrial\", Flavoprotein subunit of complex II"	SUCCINATE DEHYDROGENASE SUBUNIT 1	Biochemical character	Os07g0134800		GO:0050660 - FAD binding, GO:0006810 - transport, GO:0009055 - electron carrier activity, GO:0005739 - mitochondrion, GO:0000104 - succinate dehydrogenase activity, GO:0006099 - tricarboxylic acid cycle, GO:0005743 - mitochondrial inner membrane, GO:0022900 - electron transport chain, GO:0016491 - oxidoreductase activity, GO:0008177 - succinate dehydrogenase (ubiquinone) activity, GO:0015036 - di…
DTF	LOC_Os07g04250	7	1873911	1876942	+	214201749,214230045	hypothetical 20protein	nongenic	IGKV, WS21
DTF	LOC_Os07g04300	7	1897615	1897956	+	214201749,214230045	expressed 20protein	nongenic	IGKV
DTF	LOC_Os07g04310	7	1903120	1905581	-	214201749,214230045	expressed 20protein	nongenic	IGKV
DTF	LOC_Os07g34650	7	20768395	20772350	-	233144159 , 233102425	expressed 20protein	genic	WS21
DTF	LOC_Os07g34710	7	20803306	20805476	+	233144159 , 233137892	peroxidase 20precursor 2C 20putative 2C 20expressed	nongenic	WS21	_	prx104	_	class III peroxidase 104		Biochemical character, Tolerance and resistance - Stress tolerance, Tolerance and resistance - Disease resistance	Os07g0531400		GO:0046872 - metal ion binding, GO:0020037 - heme binding, GO:0006979 - response to oxidative stress, GO:0004601 - peroxidase activity
DTF	LOC_Os07g34720	7	20806654	20807546	+	233144159 , 233137892	harpin-induced 20protein 201 20domain 20containing 20protein 2C 20expressed	nongenic	WS21
DTF	LOC_Os07g34730	7	20808033	20812544	-	233144159 , 233102425	acyltransferase 2C 20putative 2C 20expressed	genic	WS21
DTF	LOC_Os07g34760	7	20825994	20827097	+	233144159 , 233158101	expressed 20protein	genic	WS21
DTF	LOC_Os07g35620	7	21325701	21326363	-	233664930,233690974	expressed 20protein	nongenic	ISARC
DTF	LOC_Os07g35630	7	21333580	21337607	-	233664930,233690974	retrotransposon 20protein 2C 20putative 2C 20Ty3-gypsy 20subclass 2C 20expressed	nongenic	ISARC	RLCK236	OsRLCK236	RECEPTOR-LIKE CYTOPLASMIC KINASE 236	Receptor-like Cytoplasmic Kinase 236	RECEPTOR-LIKE CYTOPLASMIC KINASE 236	Tolerance and resistance - Disease resistance, Tolerance and resistance	Os07g0540500		GO:0009611 - response to wounding, GO:0004672 - protein kinase activity, GO:0042742 - defense response to bacterium, GO:0050832 - defense response to fungus, GO:0005524 - ATP binding, GO:0003676 - nucleic acid binding	TO:0000175 - bacterial blight disease resistance, TO:0000074 - blast disease
DTF	LOC_Os07g35640	7	21345784	21346908	-	233680495,233690974	expressed 20protein	nongenic	ISARC
DTF	LOC_Os07g35650	7	21353081	21356652	-	233664930,233690974	TKL_IRAK_DUF26-lc.2 20- 20DUF26 20kinases 20have 20homology 20to 20DUF26 20containing 20loci 2C 20expressed	nongenic	ISARC
DTF	LOC_Os07g35660	7	21359653	21366555	+	233664930,233690974	TKL_IRAK_DUF26-lc.21 20- 20DUF26 20kinases 20have 20homology 20to 20DUF26 20containing 20loci 2C 20expressed	nongenic	ISARC
DTF	LOC_Os07g35680	7	21367969	21374694	-	233664930,233706000	TKL_IRAK_DUF26-lc22 20- 20DUF26 20kinases 20have 20homology 20to 20DUF26 20containing 20loci 2C 20expressed	genic	ISARC
DTF	LOC_Os07g36590	7	21876890	21883372	-	234268587,234223297	serine 2Fthreonine-protein 20kinase 20receptor 20precursor 2C 20putative 2C 20expressed	nongenic	IGKV	SDRLK6	SDRLK-6, OsSDRLK-6, OsSDRLK6	S-DOMAIN RECEPTOR LIKE KINASE 6	S-Domain receptor like kinase-6	S-DOMAIN RECEPTOR LIKE KINASE 6	Biochemical character, Tolerance and resistance - Stress tolerance, Tolerance and resistance - Disease resistance	Os07g0551300		GO:0004674 - protein serine/threonine kinase activity, GO:0048544 - recognition of pollen, GO:0009414 - response to water deprivation, GO:0042742 - defense response to bacterium, GO:0005524 - ATP binding, GO:0030912 - response to deep water, GO:0009413 - response to flooding, GO:0006468 - protein amino acid phosphorylation, GO:0016021 - integral to membrane, GO:0005886 - plasma membrane	TO:0000175 - bacterial blight disease resistance, TO:0000524 - submergence tolerance, TO:0000276 - drought tolerance
DTF	LOC_Os07g36600	7	21894659	21898727	-	234268587,234223297	universal 20stress 20protein 20domain 20containing 20protein 2C 20putative 2C 20expressed	nongenic	IGKV	USP30	OsUSP, USP, OsUSP30, OsUSP4, USP4	UNIVERSAL STRESS PROTEIN 30	universal stress protein domain containing protein	UNIVERSAL STRESS PROTEIN 30	Tolerance and resistance - Disease resistance, Tolerance and resistance - Stress tolerance	Os07g0551400		GO:0009651 - response to salt stress, GO:0050832 - defense response to fungus, GO:0006950 - response to stress	TO:0000074 - blast disease, TO:0006001 - salt tolerance	PO:0009005 - root , PO:0009009 - plant embryo , PO:0025034 - leaf , PO:0009049 - inflorescence , PO:0005052 - plant callus
DTF	LOC_Os07g36640	7	21923685	21924357	+	234268587,234223297	expressed 20protein	nongenic	IGKV
DTF	LOC_Os07g36660	7	21939836	21943033	+	234268587,234223297	retrotransposon 20protein 2C 20putative 2C 20unclassified 2C 20expressed	nongenic	IGKV
DTF	LOC_Os08g28900	8	17677910	17678691	+	259753660,259710217	OsRR8 20 20type-A 20response 20regulator 2C 20expressed	nongenic	ISARC, WS20	RR8	rr8, OsRR8, Rra13, OsRR15, RR15, OsRRA13	A-TYPE RESPONSE REGULATOR 8	A-TYPE response regulator 8, Type A response regulator 8, A-type RR 13	A-TYPE RESPONSE REGULATOR 8		Os08g0376700		GO:0045449 - regulation of transcription, GO:0000156 - two-component response regulator activity, GO:0009735 - response to cytokinin stimulus, GO:0000160 - two-component signal transduction system (phosphorelay)	TO:0000167 - cytokinin sensitivity
DTF	LOC_Os08g28920	8	17683136	17685287	-	259753660,259710217	hypothetical 20protein	nongenic	ISARC, WS20
DTF	LOC_Os08g28950	8	17714143	17714938	+	259753660 , 259749359	response 20regulator 20receiver 20domain 20containing 20protein 2C 20expressed	nongenic	WS20	RR12	OsRR12, Rra11, OsRR8, RR8, OsRRA11	A-TYPE RESPONSE REGULATOR 12	A-TYPE response regulator 12, A-type RR 11	A-TYPE RESPONSE REGULATOR 12		Os08g0377200		GO:0000156 - two-component response regulator activity, GO:0045449 - regulation of transcription, GO:0000160 - two-component signal transduction system (phosphorelay), GO:0009735 - response to cytokinin stimulus, GO:0007593 - chitin-based cuticle tanning	TO:0000167 - cytokinin sensitivity
DTF	LOC_Os08g28960	8	17720718	17725048	+	259753660	expressed 20protein	genic	ISARC, WS20	_	OsKIX_8	_	KIX domain protein 8
DTF	LOC_Os08g39350	8	24865939	24872160	+	266921248 , 266898258	glycerophosphoryl 20diester 20phosphodiesterase 20family 20protein 2C 20putative 2C 20expressed	genic	WS21	GDPDL1	OsGDPDL1, OsGL1, GL1	GLYCEROPHOSPHODIESTER PHOSPHO DIESTERASE-LIKE 1	GDPD-LIKE 1	GLYCEROPHOSPHODIESTER PHOSPHO DIESTERASE-LIKE 1	Biochemical character	Os08g0503200		GO:0008889 - glycerophosphodiester phosphodiesterase activity, GO:0006071 - glycerol metabolic process, GO:0006629 - lipid metabolic process		PO:0009066 - anther
DTF	LOC_Os08g39380	8	24887761	24891911	+	266921248 , 266898258	beta 201 2C2-xylosyltransferase 2C 20putative 2C 20expressed	genic	WS21	RCN11	Xyl, OsXylT, XylT, RCN11/OsXylT, \beta1, 2-XylT\""	REDUCED CULM NUMBER 11	\beta 1, 2-xylosyltransferase\", reduced culm number11"	BETA 1,2-XYLOSYLTRANSFERASE	Tolerance and resistance - Stress tolerance, Biochemical character, Vegetative organ - Root	Os08g0503800		GO:0009733 - response to auxin stimulus, GO:0006487 - protein amino acid N-linked glycosylation, GO:0005797 - Golgi medial cisterna, GO:0005794 - Golgi apparatus, GO:0009408 - response to heat, GO:0031204 - posttranslational protein targeting to membrane, translocation, GO:0042285 - xylosyltransferase activity, GO:0009409 - response to cold, GO:0009845 - seed germination, GO:0009753 - response to…	TO:0000432 - temperature response trait, TO:0006001 - salt tolerance, TO:0000276 - drought tolerance, TO:0000237 - water stress trait, TO:0000172 - jasmonic acid sensitivity, TO:0000615 - abscisic acid sensitivity, TO:0000163 - auxin sensitivity	PO:0006213 - root aerenchyma , PO:0007057 - 0 seed germination stage
DTF	LOC_Os08g39390	8	24905299	24908967	+	266921248 , 266937256	ZOS8-10 20- 20C2H2 20zinc 20finger 20protein 2C 20expressed	genic	WS21	DLN212	OsDLN212	DLN REPRESSOR 212	DLN repressor 212, DLN motif protein 212	DLN REPRESSOR 212		Os08g0504000		GO:0010468 - regulation of gene expression, GO:0005634 - nucleus, GO:0003676 - nucleic acid binding
DTF	LOC_Os09g11750	9	6568790	6571126	+	277085797	transposon 20protein 2C 20putative 2C 20CACTA 2C 20En 2FSpm 20sub-class	QTN	ISAH_WS2020
DTF	LOC_Os09g11760	9	6573385	6576173	-	277085797	expressed 20protein	QTN	ISAH_WS2020
DTF	LOC_Os09g11770	9	6580470	6580769	+	277085797	hypothetical 20protein	QTN	ISAH_WS2020
DTF	LOC_Os09g11780	9	6591145	6591381	+	277085797	hypothetical 20protein	QTN	ISAH_WS2020
DTF	LOC_Os09g11790	9	6594470	6594871	+	277085797	DEFL14 20- 20Defensin 20and 20Defensin-like 20DEFL 20family 2C 20expressed	QTN	ISAH_WS2020	DEFL14	OsDEFL14	DEFENSIN-LIKE 14	defensin-like 14	DEFENSIN-LIKE 14
DTF	LOC_Os09g11800	9	6596786	6598134	+	277085797	expressed 20protein	QTN	ISAH_WS2020
DTF	LOC_Os09g11810	9	6609276	6610132	-	277085797	expressed 20protein	QTN	ISAH_WS2020
DTF	LOC_Os09g11820	9	6611010	6616959	-	277085797	transposon 20protein 2C 20putative 2C 20unclassified 2C 20expressed	QTN	ISAH_WS2020
DTF	LOC_Os09g11830	9	6631460	6633006	-	277085797	expressed 20protein	QTN	ISAH_WS2020
DTF	LOC_Os09g11840	9	6639203	6641170	-	277085797	expressed 20protein	QTN	ISAH_WS2020
DTF	LOC_Os09g11870	9	6651255	6656572	-	277085797	transposon 20protein 2C 20putative 2C 20unclassified 2C 20expressed	QTN	ISAH_WS2020
DTF	LOC_Os09g13740	9	8039176	8046950	-	278553783	SET 20domain 20containing 20protein 2C 20expressed	QTN	ISAH_WS2021	LVP1	SDG724, OsSDG724, OsLVP1, OsSET34	LONG VEGETATIVE PHASE 1	SET Domain Group Protein 724, long vegetative phase1, SET protein 34	SET DOMAIN GROUP PROTEIN 724	Biochemical character, Reproductive organ - Heading date	Os09g0307800		GO:0018024 - histone-lysine N-methyltransferase activity, GO:0034968 - histone lysine methylation, GO:0005634 - nucleus, GO:0048573 - photoperiodism, flowering, GO:0046975 - histone methyltransferase activity (H3-K36 specific)	TO:0002616 - flowering time, TO:0000137 - days to heading
DTF	LOC_Os09g13760	9	8063929	8064341	-	278553783	retrotransposon 20protein 2C 20putative 2C 20unclassified	QTN	ISAH_WS2021
DTF	LOC_Os09g13780	9	8070498	8074806	+	278553783	retrotransposon 20protein 2C 20putative 2C 20unclassified 2C 20expressed	QTN	ISAH_WS2021
DTF	LOC_Os09g13790	9	8081459	8085415	+	278553783	retrotransposon 20protein 2C 20putative 2C 20Ty1-copia 20subclass 2C 20expressed	QTN	ISAH_WS2021
DTF	LOC_Os09g13800	9	8086717	8089094	-	278553783	retrotransposon 20protein 2C 20putative 2C 20Ty1-copia 20subclass 2C 20expressed	QTN	ISAH_WS2021
DTF	LOC_Os09g13820	9	8118804	8123212	+	278553783	pollen 20signalling 20protein 20with 20adenylyl 20cyclase 20activity 2C 20putative 2C 20expressed	QTN	ISAH_WS2021
DTF	LOC_Os09g13830	9	8124640	8125409	+	278553783	expressed 20protein	QTN	ISAH_WS2021
DTF	LOC_Os09g39130	9	22459228	22461846	-	292934575,292972561	expressed 20protein	nongenic	ISARC
DTF	LOC_Os09g39140	9	22465792	22466703	-	292934575,292972561	vignain 20precursor 2C 20putative 2C 20expressed	nongenic	ISARC
DTF	LOC_Os09g39170	9	22491705	22494320	-	292934575,292972561	cysteine 20proteinase 20COT44 20precursor 2C 20putative 2C 20expressed	nongenic	ISARC
DTF	LOC_Os09g39180	9	22505003	22507555	-	292934575,292972561	RNA 20recognition 20motif 20containing 20protein 2C 20putative 2C 20expressed	nongenic	ISARC	_		_				Os09g0565200		GO:0016553 - base conversion or substitution editing, GO:0009631 - cold acclimation, GO:0045087 - innate immune response, GO:0009941 - chloroplast envelope, GO:0009570 - chloroplast stroma, GO:0009535 - chloroplast thylakoid membrane, GO:0008266 - poly(U) RNA binding, GO:0019013 - viral nucleocapsid, GO:0030529 - ribonucleoprotein complex, GO:0003676 - nucleic acid binding, GO:0000166 - nucleotid…
DTF	LOC_Os10g01780	10	509626	510634	-	294003032 , 294004069	retrotransposon 20protein 2C 20putative 2C 20unclassified	nongenic	WS21
DTF	LOC_Os10g01790	10	521210	524757	-	294003032 , 294004069	transposon 20protein 2C 20putative 2C 20unclassified 2C 20expressed	nongenic	WS21
DTF	LOC_Os10g04380	10	2062493	2064004	-	295593076 , 295554881	expressed 20protein	nongenic	WS21
DTF	LOC_Os10g04400	10	2077882	2081080	+	295593076 , 295554881	transferase 20family 20protein 2C 20putative 2C 20expressed	nongenic	WS21	CRPG70	OsCRPG70	COLLAR REGION-PREFERENTIAL GENE 70	collar region-preferential gene 70	COLLAR REGION-PREFERENTIAL PROTEIN 70	Biochemical character	Os10g0133400		GO:0050734 - hydroxycinnamoyltransferase activity, GO:0016747 - transferase activity, transferring acyl groups other than amino-acyl groups		PO:0006012 - leaf collar
DTF	LOC_Os10g04470	10	2107756	2109186	-	295593076 , 295554881	conserved 20hypothetical 20protein	genic	WS21
DTF, NPT	LOC_Os10g07546	10	4047147	4049834	-	297534673, 297532213,297482770	expressed 20protein	genic, nongenic	WS20, ISARC
DTF	LOC_Os10g21090	10	10699246	10701961	+	304189993,304219696	ATP 20binding 20protein 2C 20putative 2C 20expressed	nongenic	IGKV
DTF	LOC_Os10g21100	10	10711396	10715541	+	304189993,304219696	glycosyl 20hydrolase 20family 2010 20protein 2C 20putative 2C 20expressed	nongenic	IGKV
DTF	LOC_Os10g21110	10	10727317	10730929	+	304189993,304219696	glycosyl 20hydrolase 20family 2010 20protein 2C 20putative 2C 20expressed	nongenic	IGKV	MORE1C	OsMORE1c	MAGNAPORTHE ORYZAE RESISTANCE 1C	Magnaporthe oryzae resistance 1c		Biochemical character, Tolerance and resistance - Disease resistance	Os10g0351700		GO:0050832 - defense response to fungus, GO:0000272 - polysaccharide catabolic process, GO:0004553 - hydrolase activity, hydrolyzing O-glycosyl compounds	TO:0000074 - blast disease
DTF	LOC_Os10g21130	10	10748893	10751985	-	304189993,304219696	expressed 20protein	nongenic	IGKV
DTF	LOC_Os10g22730	10	11807240	11813233	-	305334318 , 305307716	expressed 20protein	nongenic	WS20
DTF	LOC_Os10g22740	10	11822505	11824050	+	305334318 , 305307716	expressed 20protein	nongenic	WS20
DTF	LOC_Os10g22800	10	11847442	11849911	-	305334318 , 305307716	retrotransposon 20protein 2C 20putative 2C 20Ty3-gypsy 20subclass 2C 20expressed	genic	WS20
DTF	LOC_Os10g34960	10	18658538	18660544	-	312144956,312184576	ubiquitin 20family 20protein 2C 20putative 2C 20expressed	genic	ISARC
DTF	LOC_Os10g35040	10	18697593	18700089	+	312144956,312184576	receptor 20kinase 20like 20protein 2C 20putative 2C 20expressed	genic	ISARC
DTF, NPT	LOC_Os10g36924	10	19778055	19785158	-	313271326 , 313269151, 313292189 , 313271326	aquaporin 20protein 2C 20putative 2C 20expressed	genic, nongenic	WS21	ASA	OsNIP3;1, NIP3;1, NIP3-1, OsNIP3.1, NIP3.1, OsASA	APICAL SPIKELET ABORTION	Aquaporin NIP3-1, NOD26-like intrinsic protein 3-1, nodulin 26-like intrinsic protein 3-1, apical spikelet abortion	NOD26 LIKE INTRINSIC PROTEIN 3;1	Reproductive organ - Inflorescence, Biochemical character, Tolerance and resistance - Stress tolerance, Reproductive organ - panicle, Reproductive organ - Pollination, fertilization, fertility, Reproductive organ - Spikelet, flower, glume, awn	Os10g0513200		GO:0010229 - inflorescence development, GO:0009556 - microsporogenesis, GO:0016021 - integral to membrane, GO:0048656 - tapetal layer formation, GO:0010036 - response to boron, GO:0055085 - transmembrane transport, GO:0005215 - transporter activity, GO:0009536 - plastid, GO:0080142 - regulation of salicylic acid biosynthetic process, GO:0009555 - pollen development, GO:0016020 - membrane, GO:0010…	TO:0000614 - lemma shape, TO:0000621 - inflorescence development trait, TO:0000214 - anther shape, TO:0000657 - spikelet anatomy and morphology trait, TO:0000605 - hydrogen peroxide content, TO:0000346 - tiller number, TO:0000187 - anther color, TO:0000210 - anther number, TO:0006011 - lodicule shape, TO:0000207 - plant height, TO:0000421 - pollen fertility	PO:0001083 - inflorescence development stage , PO:0005004 - shoot node , PO:0001007 - pollen development stage , PO:0009066 - anther , PO:0009049 - inflorescence , PO:0009053 - peduncle , PO:0005352 - xylem , PO:0000074 - parenchyma cell
DTF, NPT	LOC_Os10g36950	10	19801017	19803767	+	313271326, 313292189 , 313271326	DUF677 20domain 20containing 20protein 2C 20putative 2C 20expressed	nongenic	ISARC, WS20, WS21, WS21	_		_				Os10g0513300		GO:0016021 - integral to membrane
DTF	LOC_Os11g16260	11	8948771	8951203	-	325652564 , 325644894	laccase 20precursor 20protein 2C 20putative 2C 20expressed	nongenic	WS21	LAC22	OsLAC22	LACCASE 22	laccase 22	LACCASE 22	Biochemical character	Os11g0264000		GO:0048046 - apoplast, GO:0016722 - oxidoreductase activity, oxidizing metal ions, GO:0046274 - lignin catabolic process, GO:0005507 - copper ion binding
DTF	LOC_Os11g16280	11	8965406	8970029	+	325652564 , 325644894	F-box 20domain 20containing 20protein 2C 20expressed	nongenic	WS21	_	OsFbox598, Os_F0672, OsFBX480, FBX480	_	F-box protein 598, F-box-type E3 ubiquitin ligase X480			Os11g0264200
DTF, PH	LOC_Os11g35980	11	21145760	21148865	+	337840804 , 337839344, 337840686	leucine 20rich 20repeat 20protein 2C 20putative 2C 20expressed	genic, QTN	WS20, IGKV_WS2020
DTF	LOC_Os11g41580	11	24941466	24942792	-	341638880 , 341641000	transposon 20protein 2C 20putative 2C 20unclassified 2C 20expressed	nongenic	WS20
DTF, NPT	LOC_Os11g41590	11	24948286	24949674	+	341638880 , 341641000, 341622612	expressed 20protein	nongenic, QTN	WS20, ISARC_WS2021
DTF	LOC_Os11g47830	11	28845905	28852938	-	345538990,345548644	RNA 20recognition 20motif 20containing 20protein 2C 20expressed	genic	ISAH	SCL57	Os-SCL57, OsSCL57	SC35-LIKE PROTEIN 57	SC35-like protein 57, SCL subfamily protein 57	SC35-LIKE PROTEIN 57	Tolerance and resistance - Stress tolerance	Os11g0704700		GO:0042594 - response to starvation, GO:0016607 - nuclear speck, GO:0003723 - RNA binding, GO:0045292 - nuclear mRNA cis splicing, via spliceosome, GO:0000381 - regulation of alternative nuclear mRNA splicing, via spliceosome, GO:0005634 - nucleus, GO:0055062 - phosphate ion homeostasis
DTF	LOC_Os11g47840	11	28853507	28857521	-	345538990,345548644	OsRhmbd18 20- 20Putative 20Rhomboid 20homologue 2C 20expressed	genic	ISAH	_	OsRhmbd18, RHMBD18	_	Rhomboid 18, RHOMBOID 18		Biochemical character	Os11g0704800		GO:0004252 - serine-type endopeptidase activity, GO:0016021 - integral to membrane
DTF, GY	LOC_Os12g31390	12	18883741	18884366	+	364630207 , 364602477, 364584836	expressed 20protein	nongenic, QTN	WS21, ISAH_WS2021
DTF, GY	LOC_Os12g31400	12	18891632	18892276	+	364630207 , 364602477, 364584836	expressed 20protein	nongenic, QTN	WS21, ISAH_WS2021
DTF, GY	LOC_Os12g31450	12	18913254	18915691	-	364630207 , 364602477, 364584836	plastid 20division 20regulator 20MinE 2C 20putative 2C 20expressed	nongenic, QTN	WS21, ISAH_WS2021
DTF, GY	LOC_Os12g31460	12	18918230	18920690	-	364630207 , 364602477, 364584836	heat 20shock 20protein 20DnaJ 2C 20putative 2C 20expressed	nongenic, QTN	WS21, ISAH_WS2021
NPT	LOC_Os01g40010	1	22566747	22574056	-	22615405	retrotransposon 20protein 2C 20putative 2C 20unclassified 2C 20expressed	QTN	ISARC_WS2021
NPT	LOC_Os01g40020	1	22575461	22576837	-	22615405	expressed 20protein	QTN	ISARC_WS2021
NPT	LOC_Os01g40030	1	22579476	22581814	-	22615405	expressed 20protein	QTN	ISARC_WS2021
NPT	LOC_Os01g40040	1	22587503	22589976	-	22615405	expressed 20protein	QTN	ISARC_WS2021
NPT	LOC_Os01g40050	1	22591350	22596165	-	22615405	peptidyl-prolyl 20cis-trans 20isomerase 2C 20putative 2C 20expressed	QTN	ISARC_WS2021	CYP57	OsCYP57, OsCYP-3, OsCYP57a, OsCYP57b	CYCLOPHILIN 57	cyclophilin 57, cyclophilin 3	CYCLOPHILIN 57	Biochemical character	Os01g0582400		GO:0006457 - protein folding, GO:0000413 - protein peptidyl-prolyl isomerization, GO:0003755 - peptidyl-prolyl cis-trans isomerase activity
NPT	LOC_Os01g40070	1	22604519	22606808	+	22615405	expressed 20protein	QTN	ISARC_WS2021
NPT	LOC_Os01g40080	1	22614141	22614771	+	22615405	hypothetical 20protein	QTN	ISARC_WS2021
NPT	LOC_Os01g40094	1	22617780	22624147	+	22615405	protein 20phosphatase 202C 2C 20putative 2C 20expressed	QTN	ISARC_WS2021	PP2C6	OsPP2C06/OsABI2, OsPP2C06, OsPP2C6, OsABI2, OsPP10, ABI2, OsABIL1, ABIL1	PROTEIN PHOSPHATASE 2C6	protein phosphatase 2C6, protein phosphatase 2C 6, protein phosphatase 10, OsABI-LIKE1, ABI-LIKE1, ABI-LIKE 1	PROTEIN PHOSPHATASE 2C6	Tolerance and resistance - Stress tolerance	Os01g0583100		GO:0009737 - response to abscisic acid stimulus, GO:0006470 - protein amino acid dephosphorylation, GO:0006970 - response to osmotic stress, GO:0080134 - regulation of response to stress, GO:0046872 - metal ion binding, GO:0005829 - cytosol, GO:0004722 - protein serine/threonine phosphatase activity	TO:0000095 - osmotic response sensitivity, TO:0000164 - stress trait, TO:0000615 - abscisic acid sensitivity
NPT	LOC_Os01g40110	1	22625206	22628058	-	22615405	ZOS1-11 20- 20C2H2 20zinc 20finger 20protein 2C 20expressed	QTN	ISARC_WS2021
NPT	LOC_Os01g40120	1	22632889	22637560	-	22615405	expressed 20protein	QTN	ISARC_WS2021	_	Os_F0727	_				Os01g0583300
NPT	LOC_Os01g40130	1	22639243	22640243	+	22615405	retrotransposon 20protein 2C 20putative 2C 20unclassified 2C 20expressed	QTN	ISARC_WS2021
NPT	LOC_Os01g40150	1	22645023	22650145	+	22615405	eukaryotic 20translation 20initiation 20factor 205B 2C 20putative 2C 20expressed	QTN	ISARC_WS2021	_	OsSTA17	_			Reproductive organ - Spikelet, flower, glume, awn	Os01g0583700				PO:0009066 - anther
NPT	LOC_Os01g40160	1	22651086	22653720	-	22615405	OsFBX16 20- 20F-box 20domain 20containing 20protein 2C 20expressed	QTN	ISARC_WS2021	_	OsFbox020, OsFbox20, Os_F0674, OsFBX16, FBX16	_	F-box protein 20, F-box-type E3 ubiquitin ligase X16			Os01g0583800
NPT	LOC_Os01g40170	1	22656369	22664571	+	22615405	translation 20initiation 20factor 2C 20putative 2C 20expressed	QTN	ISARC_WS2021
NPT	LOC_Os01g40499	1	22879904	22895941	-	22943877	S-locus 20lectin 20protein 20kinase 20family 20protein 2C 20putative 2C 20expressed	QTN	ISARC_WS2021	SDRLK49	SDRLK-49, OsSDRLK-49, OsSDRLK49	S-DOMAIN RECEPTOR LIKE KINASE 49	S-Domain receptor like kinase-49	S-DOMAIN RECEPTOR LIKE KINASE 49	Tolerance and resistance - Stress tolerance, Biochemical character	Os01g0587400		GO:0006468 - protein amino acid phosphorylation, GO:0048544 - recognition of pollen, GO:0005886 - plasma membrane, GO:0030912 - response to deep water, GO:0009413 - response to flooding, GO:0004674 - protein serine/threonine kinase activity, GO:0005524 - ATP binding, GO:0016021 - integral to membrane	TO:0000524 - submergence tolerance	PO:0009030 - carpel , PO:0020094 - plant egg cell
NPT	LOC_Os01g40520	1	22896081	22896821	+	22943877	expressed 20protein	QTN	ISARC_WS2021
NPT	LOC_Os01g40530	1	22897481	22898843	-	22943877	hsp20 2Falpha 20crystallin 20family 20protein 2C 20putative 2C 20expressed	QTN	ISARC_WS2021
NPT	LOC_Os01g40540	1	22899829	22900317	+	22943877	lectin 20receptor-type 20protein 20kinase 2C 20putative 2C 20expressed	QTN	ISARC_WS2021
NPT	LOC_Os01g40550	1	22900967	22902320	-	22943877	hsp20 2Falpha 20crystallin 20family 20protein 2C 20putative 2C 20expressed	QTN	ISARC_WS2021
NPT	LOC_Os01g40560	1	22906443	22907811	+	22943877	hypersensitive-induced 20response 20protein 2C 20putative 2C 20expressed	QTN	ISARC_WS2021
NPT	LOC_Os01g40570	1	22908180	22910687	-	22943877	outer 20mitochondrial 20membrane 20porin 2C 20putative 2C 20expressed	QTN	ISARC_WS2021	_	OSVDAC3, osvdac3, OsVDAC3, VDAC3	_	voltage-dependent anion channel 3, voltage-dependent anion-selective channel 3		Biochemical character	Os01g0588200		GO:0015288 - porin activity, GO:0046930 - pore complex, GO:0005741 - mitochondrial outer membrane, GO:0008308 - voltage-gated anion channel activity
NPT	LOC_Os01g40580	1	22914582	22916173	-	22943877	hypersensitive-induced 20response 20protein 2C 20putative 2C 20expressed	QTN	ISARC_WS2021
NPT	LOC_Os01g40590	1	22918453	22923870	-	22943877	tyrosine 20protein 20kinase 20domain 20containing 20protein 2C 20putative 2C 20expressed	QTN	ISARC_WS2021	RLCK40	OsRLCK40, PTK1, OsPTK1	RECEPTOR-LIKE CYTOPLASMIC KINASE 40	Receptor-like Cytoplasmic Kinase 40, Protein Tyrosine Kinase 1	RECEPTOR-LIKE CYTOPLASMIC KINASE 40	Reproductive organ - panicle, Tolerance and resistance, Tolerance and resistance - Stress tolerance, Tolerance and resistance - Disease resistance, Seed	Os01g0588500		GO:0006970 - response to osmotic stress, GO:0048316 - seed development, GO:0010229 - inflorescence development, GO:0004674 - protein serine/threonine kinase activity, GO:0030912 - response to deep water, GO:0009408 - response to heat, GO:0005524 - ATP binding, GO:0009611 - response to wounding, GO:0050832 - defense response to fungus	TO:0000621 - inflorescence development trait, TO:0000524 - submergence tolerance, TO:0000074 - blast disease, TO:0000095 - osmotic response sensitivity, TO:0000259 - heat tolerance, TO:0000653 - seed development trait	PO:0009066 - anther , PO:0001083 - inflorescence development stage , PO:0000003 - whole plant , PO:0009051 - spikelet , PO:0009030 - carpel , PO:0009049 - inflorescence , PO:0009010 - seed , PO:0001170 - seed development stage
NPT	LOC_Os01g40600	1	22929243	22930118	+	22943877	coiled-coil 20domain-containing 20protein 2C 20putative 2C 20expressed	QTN	ISARC_WS2021	_		_	Protein of unknown function DUF572 family			Os01g0588600
NPT	LOC_Os01g40610	1	22931927	22937272	+	22943877	coiled-coil 20domain-containing 20protein 2C 20putative 2C 20expressed	QTN	ISARC_WS2021
NPT	LOC_Os01g40620	1	22948164	22952187	+	22943877	Uncharacterized 20ACR 2C 20COG1565 20containing 20protein 2C 20putative 2C 20expressed	QTN	ISARC_WS2021
NPT, PH	LOC_Os01g40630	1	22954908	22959225	-	22943877, 22992382 , 22975824	uncharacterized 20protein 20PA4923 2C 20putative 2C 20expressed	QTN, nongenic	ISARC_WS2021, WS20	LOG1	OsLOG1, LOG, Log, log, OsLOG	LONELY GUY 1	LONELY GUY, Lonely Guy, lonely guy, Protein LONELY GUY, Cytokinin riboside 5'-monophosphate phosphoribohydrolase LOG	CYTOKININ RIBOSIDE 5'-MONOPHOSPHATE PHOSPHORIBOHYDROLASE LOG	Reproductive organ - Pollination, fertilization, fertility - Female sterility, Reproductive organ - Panicle, Mode of branching, Vegetative organ - Shoot apical meristem(SAM), Character as QTL - Yield and productivity	Os01g0588900		GO:0010077 - maintenance of inflorescence meristem identity, GO:0010076 - maintenance of floral meristem identity, GO:0048832 - specification of organ number, GO:0010083 - regulation of vegetative meristem growth, GO:0010074 - maintenance of meristem identity, GO:0009736 - cytokinin mediated signaling, GO:0009691 - cytokinin biosynthetic process, GO:0010073 - meristem maintenance, GO:0016799 - hy…	TO:0000050 - inflorescence branching, TO:0006022 - floral organ development trait, TO:0002759 - grain number, TO:0006032 - panicle size, TO:0000017 - anatomy and morphology related trait, TO:0000089 - panicle type, TO:0000040 - panicle length, TO:0002660 - cytokinin content, TO:0002659 - pistil number	PO:0000230 - inflorescence meristem , PO:0000229 - flower meristem , PO:0025530 - reproductive shoot system development stage , PO:0009105 - inflorescence branch meristem
NPT, PH	LOC_Os01g40640	1	22979942	22983176	-	22943877, 22992382 , 22975824	S1 20RNA 20binding 20domain 20containing 20protein 2C 20expressed	QTN, nongenic	ISARC_WS2021, WS20
NPT	LOC_Os01g40650	1	22983392	22985788	+	22943877	expressed 20protein	QTN	ISARC_WS2021
NPT	LOC_Os01g40660	1	22986748	22987781	+	22943877	methyltransferase 2C 20putative 2C 20expressed	QTN	ISARC_WS2021
NPT, PH	LOC_Os01g40670	1	22988229	22992468	+	22943877, 22992382 , 22975824	single 20myb 20histone 2C 20putative 2C 20expressed	QTN, genic	ISARC_WS2021, WS20	TRBF1	OsTRBF1	TELOMERE REPEAT-BINDING FACTOR 1	sativa telomere repeat-binding factor 1	TELOMERE REPEAT-BINDING FACTOR 1		Os01g0589300		GO:0003677 - DNA binding, GO:0000781 - chromosome, telomeric region, GO:0042162 - telomeric DNA binding, GO:0006334 - nucleosome assembly, GO:0005730 - nucleolus
NPT	LOC_Os01g40680	1	22992552	22994171	-	22943877	pentatricopeptide 2C 20putative 2C 20expressed	QTN	ISARC_WS2021
NPT, PH	LOC_Os01g45250	1	25681570	25683076	+	25699766, 25678386	DUF1645 20domain 20containing 20protein 2C 20putative 2C 20expressed	QTN	IGKV_WS2021, IGKV_WS2020
NPT, PH	LOC_Os01g45274	1	25692717	25705090	+	25699766, 25678386	carbonic 20anhydrase 2C 20chloroplast 20precursor 2C 20putative 2C 20expressed	QTN	IGKV_WS2021, IGKV_WS2020	BETACA1	OsCA, CA, OsbetaCA1, betaCA1, CA1	BETA-CARBONIC ANHYDRASE 1	Carbonic anhydrase, beta-type carbonic anhydrase, beta-carbonic anhydrase	BETA-CARBONIC ANHYDRASE 1	Tolerance and resistance - Disease resistance, Biochemical character, Tolerance and resistance - Stress tolerance	Os01g0639900		GO:0008270 - zinc ion binding, GO:0050832 - defense response to fungus, GO:0048046 - apoplast, GO:0042742 - defense response to bacterium, GO:0015976 - carbon utilization, GO:0010119 - regulation of stomatal movement, GO:0009409 - response to cold, GO:0010037 - response to carbon dioxide, GO:0004089 - carbonate dehydratase activity, GO:0005829 - cytosol, GO:0005886 - plasma membrane, GO:0009408 -…	TO:0000457 - total biomass yield, TO:0000074 - blast disease, TO:0000316 - photosynthetic ability, TO:0001015 - photosynthetic rate, TO:0000259 - heat tolerance, TO:0000552 - shoot dry weight, TO:0000571 - shoot fresh weight, TO:0000520 - stomatal closure rate, TO:0000432 - temperature response trait, TO:0000276 - drought tolerance, TO:0000522 - stomatal conductance	PO:0000293 - guard cell
NPT, PH	LOC_Os01g45290	1	25708316	25714989	+	25699766, 25678386	retrotransposon 20protein 2C 20putative 2C 20unclassified 2C 20expressed	QTN	IGKV_WS2021, IGKV_WS2020
NPT, PH	LOC_Os01g45330	1	25727086	25734913	-	25699766, 25678386	retrotransposon 20protein 2C 20putative 2C 20Ty3-gypsy 20subclass 2C 20expressed	QTN	IGKV_WS2021, IGKV_WS2020
NPT, PH	LOC_Os01g45350	1	25745252	25747963	+	25699766, 25678386	exostosin 20family 20protein 2C 20putative 2C 20expressed	QTN	IGKV_WS2021, IGKV_WS2020
NPT	LOC_Os01g51690	1	29720923	29723065	-	29765877	WRKY26 2C 20expressed	QTN	ISAH_WS2020	WRKY26	OsWRKY26, OsWRKY59, DLN19, OsDLN19	WRKY GENE 26	Rice WRKY gene 26, Rice WRKY gene 59, DLN repressor 19, DLN motif protein 19	TRANSCRIPTION FACTOR WRKY26	Tolerance and resistance - Stress tolerance, Tolerance and resistance - Disease resistance, Tolerance and resistance - Insect resistance, Vegetative organ - Leaf	Os01g0714800		GO:0009409 - response to cold, GO:0006952 - defense response, GO:0010150 - leaf senescence, GO:0003700 - transcription factor activity, GO:0007568 - aging, GO:0009737 - response to abscisic acid stimulus, GO:0042742 - defense response to bacterium, GO:0009408 - response to heat, GO:0009414 - response to water deprivation, GO:0043565 - sequence-specific DNA binding, GO:0009651 - response to salt s…	TO:0000424 - brown planthopper resistance, TO:0000249 - leaf senescence, TO:0000175 - bacterial blight disease resistance, TO:0000276 - drought tolerance, TO:0006001 - salt tolerance, TO:0000074 - blast disease, TO:0000259 - heat tolerance, TO:0000615 - abscisic acid sensitivity, TO:0000303 - cold tolerance	PO:0001054 - 4 leaf senescence stage
NPT	LOC_Os01g51700	1	29730128	29735114	-	29765877	ras-related 20protein 2C 20putative 2C 20expressed	QTN	ISAH_WS2020	RAB7A2	OsRab7A2	_	small GTP-binding protein OsRab7A2			Os01g0714900		GO:0007264 - small GTPase mediated signal transduction, GO:0015031 - protein transport, GO:0005525 - GTP binding, GO:0005886 - plasma membrane
NPT	LOC_Os01g51710	1	29736288	29739449	-	29765877	zinc 20knuckle 20domain 20containing 20protein 2C 20expressed	QTN	ISAH_WS2020
NPT	LOC_Os01g51720	1	29740123	29742527	+	29765877	expressed 20protein	QTN	ISAH_WS2020
NPT	LOC_Os01g51730	1	29744072	29744371	+	29765877	expressed 20protein	QTN	ISAH_WS2020
NPT	LOC_Os01g51735	1	29750793	29751436	-	29765877	expressed 20protein	QTN	ISAH_WS2020
NPT	LOC_Os01g51754	1	29760719	29770037	+	29765877	alpha-amylase 20precursor 2C 20putative 2C 20expressed	QTN	ISAH_WS2020	AMY4A	OsSTA30, Amy4A, OsAMY4A	ALPHA-AMYLASE 4A	Alpha-amylase4A	ALPHA-AMYLASE 4A	Reproductive organ - Spikelet, flower, glume, awn	Os01g0715400		GO:0004556 - alpha-amylase activity, GO:0009507 - chloroplast, GO:0005509 - calcium ion binding, GO:0005983 - starch catabolic process		PO:0009066 - anther
NPT	LOC_Os01g51770	1	29770182	29773361	-	29765877	outer 20mitochondrial 20membrane 20porin 2C 20putative 2C 20expressed	QTN	ISAH_WS2020	_	OSVDAC4, osvdac4, OsVDAC4, VDAC4	_	voltage-dependent anion channel 4, voltage-dependent anion-selective channel 4		Biochemical character	Os01g0715500		GO:0046930 - pore complex, GO:0006811 - ion transport, GO:0005741 - mitochondrial outer membrane, GO:0015288 - porin activity
NPT	LOC_Os01g51780	1	29775789	29778473	-	29765877	auxin 20efflux 20carrier 20component 2C 20putative 2C 20expressed	QTN	ISAH_WS2020	PIN8	OsPIN8	PIN PROTEIN 8		PIN PROTEIN 8	Biochemical character	Os01g0715600		GO:0055085 - transmembrane transport, GO:0016021 - integral to membrane
NPT	LOC_Os01g51790	1	29780279	29783148	+	29765877	expressed 20protein	QTN	ISAH_WS2020
NPT	LOC_Os01g51800	1	29783547	29785958	-	29765877	expressed 20protein	QTN	ISAH_WS2020
NPT	LOC_Os01g51810	1	29786135	29788237	-	29765877	pentatricopeptide 2C 20putative 2C 20expressed	QTN	ISAH_WS2020
NPT	LOC_Os01g51820	1	29789967	29796845	+	29765877	retrotransposon 20protein 2C 20putative 2C 20Ty3-gypsy 20subclass 2C 20expressed	QTN	ISAH_WS2020
NPT	LOC_Os01g51830	1	29797547	29800569	-	29765877	retrotransposon 20protein 2C 20putative 2C 20Ty3-gypsy 20subclass	QTN	ISAH_WS2020
NPT	LOC_Os01g51840	1	29801081	29806970	-	29765877	IQ 20calmodulin-binding 20motif 20family 20protein 2C 20putative 2C 20expressed	QTN	ISAH_WS2020
NPT	LOC_Os01g71910	1	41665416	41669098	+	41705848	transposon 20protein 2C 20putative 2C 20CACTA 2C 20En 2FSpm 20sub-class 2C 20expressed	QTN	IGKV_WS2021, IGKV_WS2020
NPT	LOC_Os01g71960	1	41691174	41698706	+	41705848,41711808	endonuclease 2C 20putative 2C 20expressed	nongenic, QTN	IGKV, IGKV_WS2021, IGKV_WS2020	_	OsMUS81, OsMUS81alpha, OsMUS81beta, ERCC4	_			Biochemical character, Tolerance and resistance - Stress tolerance	Os01g0948100		GO:0000794 - condensed nuclear chromosome, GO:0003677 - DNA binding, GO:0000724 - double-strand break repair via homologous recombination, GO:0051026 - chiasma formation, GO:0006312 - mitotic recombination, GO:0046872 - metal ion binding, GO:0051301 - cell division, GO:0004519 - endonuclease activity, GO:0007067 - mitosis
NPT	LOC_Os01g71970	1	41711881	41713811	+	41705848,41711808	GRAS 20family 20transcription 20factor 20containing 20protein 2C 20expressed	nongenic, QTN	IGKV, IGKV_WS2021, IGKV_WS2020	GRAS6	OsGRAS-6, OsGRAS6, GRAS-6, OsGRAS5, GRAS5	GRAS PROTEIN 6	GRAS protein 6	GRAS PROTEIN 6	Tolerance and resistance - Disease resistance, Tolerance and resistance - Stress tolerance	Os01g0948200		GO:0009651 - response to salt stress, GO:0009737 - response to abscisic acid stimulus, GO:0005634 - nucleus, GO:0003712 - transcription cofactor activity, GO:0003700 - transcription factor activity, GO:0043565 - sequence-specific DNA binding, GO:0050832 - defense response to fungus, GO:0042742 - defense response to bacterium	TO:0000255 - sheath blight disease resistance, TO:0000615 - abscisic acid sensitivity, TO:0000175 - bacterial blight disease resistance, TO:0006001 - salt tolerance
NPT	LOC_Os01g71980	1	41716009	41719018	+	41705848	rho-GTPase-activating 20protein-like 2C 20putative 2C 20expressed	QTN	IGKV_WS2021, IGKV_WS2020
NPT	LOC_Os01g71990	1	41718016	41721574	-	41705848	pyrroline-5-carboxylate 20reductase 2C 20putative 2C 20expressed	QTN	IGKV_WS2021, IGKV_WS2020	P5CR	OsP5CR	PYRROLINE-5-CARBOXYLATE REDUCTASE	delta-pyrroline-5-carboxylate reductase, pyrroline-5-carboxylate reductase	PYRROLINE-5-CARBOXYLATE REDUCTASE	Biochemical character, Tolerance and resistance - Stress tolerance	Os01g0948400		GO:0009408 - response to heat, GO:0010033 - response to organic substance, GO:0009414 - response to water deprivation, GO:0006979 - response to oxidative stress, GO:0009409 - response to cold, GO:0004735 - pyrroline-5-carboxylate reductase activity, GO:0009651 - response to salt stress, GO:0005618 - cell wall, GO:0006970 - response to osmotic stress, GO:0006561 - proline biosynthetic process	TO:0000303 - cold tolerance, TO:0000095 - osmotic response sensitivity, TO:0006002 - proline content, TO:0000259 - heat tolerance, TO:0002657 - oxidative stress, TO:0006001 - salt tolerance, TO:0000276 - drought tolerance
NPT	LOC_Os01g72000	1	41722424	41726252	-	41705848	armadillo 20repeat-containing 20protein 2C 20putative 2C 20expressed	QTN	IGKV_WS2021, IGKV_WS2020
NPT	LOC_Os01g72009	1	41728651	41729616	-	41705848	expressed 20protein	QTN	IGKV_WS2021, IGKV_WS2020
NPT	LOC_Os01g72020	1	41741160	41744666	-	41705848	BTBA3 20- 20Bric-a-Brac 2CTramtrack 2C 20Broad 20Complex 20BTB 20domain 20with 20Ankyrin 20repeat 20region 2C 20expressed	QTN	IGKV_WS2021, IGKV_WS2020	BOP1	OsNPR5, NPR5, NH4, OsNH4, OsBOP1, OsBTBA3, BTBA3	BLADE-ON-PETIOLE 1	NPR1-like gene 5, NPR1 homolog 4, OsBLADE-ON-PETIOLE1, BTB-type E3 ubiquitin ligase A3	NPR1-LIKE PROTEIN 5	Vegetative organ - Leaf, Heterochrony	Os01g0948900		GO:0010254 - nectary development, GO:0048439 - flower morphogenesis, GO:0040034 - regulation of development, heterochronic, GO:0005737 - cytoplasm, GO:0010582 - floral meristem determinacy, GO:0009944 - polarity specification of adaxial/abaxial axis, GO:0005634 - nucleus, GO:0010227 - floral organ abscission, GO:0009790 - embryonic development, GO:0048366 - leaf development, GO:0009954 - proximal…	TO:0002689 - leaf sheath length, TO:0000492 - leaf shape	PO:0000017 - vascular leaf primordium , PO:0020148 - shoot apical meristem , PO:0009105 - inflorescence branch meristem , PO:0020128 - leaf margin , PO:0020105 - ligule , PO:0001050 - leaf development stage , PO:0020104 - leaf sheath
NPT	LOC_Os02g34550	2	20708453	20715219	+	63981954,64019787	transposon 20protein 2C 20putative 2C 20unclassified 2C 20expressed	genic	ISAH, WS21
NPT	LOC_Os02g34600	2	20746262	20751379	-	63981954,64019787	CAMK_CAMK_like.13 20- 20CAMK 20includes 20calcium 2Fcalmodulin 20depedent 20protein 20kinases 2C 20expressed	genic	ISAH	SAPK6	OsSAPK6, OSRK1, OsSnRK2.6, SnRK2.6	STRESS/ABA-ACTIVATED PROTEIN KINASE 6	stress/ABA-activated protein kinase 6, Stress-Activated Protein Kinase 6, Sucrose nonfermenting-1-related protein kinase 2.6, OSMOTIC STRESS/ABA-ACTIVATED PROTEIN KINASE 6	STRESS/ABA-ACTIVATED PROTEIN KINASE 6	Tolerance and resistance - Stress tolerance	Os02g0551100		GO:0005856 - cytoskeleton, GO:0005524 - ATP binding, GO:0009738 - abscisic acid mediated signaling, GO:0009414 - response to water deprivation, GO:0004674 - protein serine/threonine kinase activity, GO:0009651 - response to salt stress, GO:0009737 - response to abscisic acid stimulus, GO:0009409 - response to cold	TO:0000615 - abscisic acid sensitivity, TO:0006001 - salt tolerance, TO:0000303 - cold tolerance, TO:0000276 - drought tolerance
NPT	LOC_Os02g34610	2	20752908	20753420	-	64022368 , 63981954	expressed 20protein	nongenic	WS21
NPT	LOC_Os02g35220	2	21170529	21173882	-	64492176	expressed 20protein	QTN	ISARC_WS2021
NPT	LOC_Os02g35230	2	21174988	21180171	-	64492176	expressed 20protein	QTN	ISARC_WS2021
NPT	LOC_Os02g35280	2	21203327	21205644	+	64492176	retrotransposon 20protein 2C 20putative 2C 20unclassified	QTN	ISARC_WS2021
NPT	LOC_Os02g35290	2	21206438	21211815	-	64492176	retrotransposon 20protein 2C 20putative 2C 20Ty3-gypsy 20subclass 2C 20expressed	QTN	ISARC_WS2021
NPT	LOC_Os02g35300	2	21225043	21228732	+	64492176	transposon 20protein 2C 20putative 2C 20unclassified 2C 20expressed	QTN	ISARC_WS2021	_	Orysa;CKL9	_	CDK-LIKE 9, cyclin-dependent kinase-like 9	_	Biochemical character	Os02g0559300		GO:0004674 - protein serine/threonine kinase activity, GO:0005524 - ATP binding
NPT	LOC_Os02g35310	2	21228952	21231366	-	64492176	12-oxophytodienoate 20reductase 2C 20putative 2C 20expressed	QTN	ISARC_WS2021	OPR8	OsOPR8, OsOPR7, OsOPR02-1	12-OXOPHYTODIENOATE REDUCTASE 8	12-oxo-phytodienoic acid reductase 8	12-OXOPHYTODIENOATE REDUCTASE 8	Tolerance and resistance - Disease resistance, Biochemical character	Os02g0559400		GO:0016629 - 12-oxophytodienoate reductase activity, GO:0010181 - FMN binding, GO:0016491 - oxidoreductase activity, GO:0031408 - oxylipin biosynthetic process
NPT	LOC_Os02g35320	2	21243251	21246761	+	64492176	expressed 20protein	QTN	ISARC_WS2021
NPT	LOC_Os02g39460	2	23802077	23802644	-	67114714	retrotransposon 2C 20putative 2C 20centromere-specific 2C 20expressed	QTN	ISARC_WS2020
NPT	LOC_Os02g39470	2	23810292	23819824	-	67114714	cyclin 2C 20N-terminal 20domain 20containing 20protein 2C 20expressed	QTN	ISARC_WS2020	PP32	OsPP32	PROTEIN PHOSPHATASE 32	Protein phosphatase 32	PROTEIN PHOSPHATASE 32		Os02g0607400/Os02g0607433		GO:0007049 - cell cycle, GO:0005634 - nucleus, GO:0000079 - regulation of cyclin-dependent protein kinase activity
NPT	LOC_Os02g39480	2	23821241	23826110	-	67114714	protein 20phosphatase 202C 2C 20putative 2C 20expressed	QTN	ISARC_WS2020	PP2C22	OsPP2C22, OsPP33	PROTEIN PHOSPHATASE 2C22	protein phosphatase 2C22, protein phosphatase 2C 22, protein phosphatase 33	PROTEIN PHOSPHATASE 2C22		Os02g0607500		GO:0004722 - protein serine/threonine phosphatase activity, GO:0046872 - metal ion binding, GO:0006470 - protein amino acid dephosphorylation
NPT	LOC_Os02g39490	2	23829190	23834725	-	67114714	carbonyl 20reductase 203 2C 20putative 2C 20expressed	QTN	ISARC_WS2020
NPT	LOC_Os02g39500	2	23840090	23840455	-	67114714	expressed 20protein	QTN	ISARC_WS2020
NPT	LOC_Os02g39510	2	23845809	23846604	+	67114714	expressed 20protein	QTN	ISARC_WS2020
NPT	LOC_Os02g39520	2	23849739	23855241	+	67114714	transposon 20protein 2C 20putative 2C 20unclassified 2C 20expressed	QTN	ISARC_WS2020
NPT	LOC_Os02g39530	2	23855855	23858516	-	67114714	expressed 20protein	QTN	ISARC_WS2020
NPT	LOC_Os02g39540	2	23859837	23864637	+	67114714	transposon 20protein 2C 20putative 2C 20unclassified 2C 20expressed	QTN	ISARC_WS2020
NPT	LOC_Os02g39550	2	23866395	23874881	-	67114714	calcium-binding 20mitochondrial 20protein 20anon-60Da 2C 20putative 2C 20expressed	QTN	ISARC_WS2020
NPT	LOC_Os02g39560	2	23876491	23881702	-	67114714	non-receptor 20tyrosine 20kinase 20spore 20lysis 20A 2C 20putative 2C 20expressed	QTN	ISARC_WS2020
NPT	LOC_Os02g39570	2	23885607	23890742	+	67114714	ACT 20domain 20containing 20protein 2C 20expressed	QTN	ISARC_WS2020
NPT	LOC_Os02g39580	2	23890966	23892935	+	67114714	ZOS2-12 20- 20C2H2 20zinc 20finger 20protein 2C 20expressed	QTN	ISARC_WS2020
NPT	LOC_Os02g40000	2	24196057	24201431	+	67489795 , 67538334	trafficking 20protein 20particle 20complex 20subunit 2C 20putative 2C 20expressed	nongenic	WS21
NPT	LOC_Os02g40010	2	24223305	24228766	+	67524030	phosphoribosyl 20transferase 2C 20putative 2C 20expressed	QTN, nongenic	ISAH_WS2021, WS21
NPT	LOC_Os02g40020	2	24228833	24229215	-	67524030	expressed 20protein	QTN	ISAH_WS2021
NPT	LOC_Os02g40030	2	24235668	24239781	+	67524030	transporter 20family 20protein 2C 20putative 2C 20expressed	QTN	ISAH_WS2021	BC14	OsBC14, OsNST1, NST1	BRITTLE CULM 14	brittle culm 14, Oryza sativa nucleotide sugar transport 1, nucleotide sugar transport 1, Nucleotide Sugar Transporter1		Vegetative organ - Culm	Os02g0614100		GO:0016021 - integral to membrane
NPT	LOC_Os02g40040	2	24240087	24242558	-	67524030	expressed 20protein	QTN, nongenic	ISAH_WS2021, WS21
NPT	LOC_Os02g40050	2	24254304	24255026	-	67524030 , 67557780	retrotransposon 20protein 2C 20putative 2C 20unclassified	nongenic	WS21
NPT	LOC_Os02g40070	2	24261671	24266297	+	67524030	AP2-like 20ethylene-responsive 20transcription 20factor 20PLETHORA 202 2C 20putative 2C 20expressed	QTN, nongenic	ISAH_WS2021, WS21	PLT3	OsPLT3, AP2/EREBP#018, AP2/EREBP18, BBM2, OsBBM2	PLETHORA 3	Plethora 3, APETALA2/ETHYLENE-RESPONSIVE ELEMENT BINDING PROTEIN 18, BABY BOOM2, BABY BOOM 2	PLETHORA 3	Seed - Morphological traits - Embryo, Other	Os02g0614300		GO:0009790 - embryonic development, GO:0003677 - DNA binding, GO:0006351 - transcription, DNA-dependent, GO:0005634 - nucleus, GO:0003700 - transcription factor activity	TO:0000345 - seed viability	PO:0000423 - plant zygote
NPT	LOC_Os02g40080	2	24268151	24270021	+	67524030	tic20 2C 20putative 2C 20expressed	QTN, nongenic	ISAH_WS2021, WS21
NPT	LOC_Os02g40090	2	24270234	24273675	-	67524030	transporter-related 2C 20putative 2C 20expressed	QTN	ISAH_WS2021
NPT	LOC_Os02g40100	2	24276308	24281041	+	67524030	plant 20protein 20of 20unknown 20function 20DUF869 20domain 20containing 20protein 2C 20expressed	QTN	ISAH_WS2021
NPT	LOC_Os02g40110	2	24283189	24284804	-	67524030	expressed 20protein	QTN, nongenic	ISAH_WS2021, WS21
NPT	LOC_Os02g40120	2	24288819	24289641	-	67524030	expressed 20protein	QTN, nongenic	ISAH_WS2021, WS21
NPT, PH	LOC_Os02g40400	2	24462248	24467715	-	67784939, 67784735	expressed 20protein	QTN	ISARC_WS2021, IGKV_WS2020
NPT, PH	LOC_Os02g40410	2	24471544	24477323	-	67784939, 67784735	expressed 20protein	QTN, QTN, nongenic	ISARC_WS2021, IGKV_WS2020, WS20
NPT, PH	LOC_Os02g40420	2	24482990	24487434	-	67784939, 67784735	expressed 20protein	QTN, QTN, nongenic	ISARC_WS2021, IGKV_WS2020, WS20
NPT, PH, PL	LOC_Os02g40430	2	24489115	24501837	-	67784939, 67784735, 67820962	HEAT 20repeat 20family 20protein 2C 20putative 2C 20expressed	QTN, QTN, nongenic	ISARC_WS2021, IGKV_WS2020, WS20, ISAH_WS2020
NPT, PH, PL	LOC_Os02g40440	2	24516374	24518200	+	67784939, 67784735, 67820962	GDSL-like 20lipase 2Facylhydrolase 2C 20putative 2C 20expressed	QTN, QTN, nongenic	ISARC_WS2021, IGKV_WS2020, WS20, ISAH_WS2020	GELP40	OsGELP40	GDSL ESTERASE/LIPASE PROTEIN 40	GDSL esterase/lipase protein 40	GDSL ESTERASE/LIPASE PROTEIN 40	Biochemical character	Os02g0617400		GO:0006629 - lipid metabolic process, GO:0016788 - hydrolase activity, acting on ester bonds
NPT, PH, PL	LOC_Os02g40450	2	24518227	24527233	+	67784939, 67784735, 67820962	DEAD 2FDEAH 20box 20helicase 20domain 20containing 20protein 2C 20expressed	QTN	ISARC_WS2021, IGKV_WS2020, ISAH_WS2020	RMC1	MER3, mer3, OsMER3, RCK, OsRCK, Os-MER3	RICE MEIOTIC CROSSOVER 1	ZMM protein, ROCK-N-ROLLERS	DNA HELICASE	Reproductive organ - Pollination, fertilization, fertility - Meiosis	Os02g0617500		GO:0051026 - chiasma formation, GO:0003676 - nucleic acid binding, GO:0008026 - ATP-dependent helicase activity, GO:0005524 - ATP binding, GO:0007131 - reciprocal meiotic recombination, GO:0007126 - meiosis
NPT, PH, PL	LOC_Os02g40454	2	24526907	24530961	-	67784939, 67784735, 67820962	serine 2Fthreonine 20protein 20phosphatase 202A 2055 20kDa 20regulatory 20subunit 20B 2C 20putative 2C 20expressed	QTN	ISARC_WS2021, IGKV_WS2020, ISAH_WS2020
NPT, PH, PL	LOC_Os02g40460	2	24531291	24534829	-	67784939, 67784735, 67820962	S1 20RNA 20binding 20domain 20containing 20protein 2C 20expressed	QTN	ISARC_WS2021, IGKV_WS2020, ISAH_WS2020
NPT, PH, PL	LOC_Os02g40490	2	24560176	24563246	+	67784939, 67784735, 67820962	expressed 20protein	QTN, QTN, nongenic	ISARC_WS2021, IGKV_WS2020, ISAH_WS2020, WS20
NPT, PH	LOC_Os02g40784	2	24718047	24724120	-	68038472, 67963433	WAX2 2C 20putative 2C 20expressed	QTN	IGKV_WS2021	LTR1	OsCER1, CER1, OsGL1-4, GL1-4, Os CER1, OsLTR1	LEAF TIP RUMPLED 1	ECERIFERUM 1, Glossy1-homologous gene 4		Vegetative organ - Leaf, Character as QTL - Yield and productivity, Biochemical character, Reproductive organ - Pollination, fertilization, fertility, Reproductive organ - Spikelet, flower, glume, awn, Reproductive organ - Pollination, fertilization, fertility - Male sterility, Tolerance and resistance - Stress tolerance	Os02g0621300		GO:0005506 - iron ion binding, GO:0050801 - ion homeostasis, GO:0048366 - leaf development, GO:0006833 - water transport, GO:0009651 - response to salt stress, GO:0016491 - oxidoreductase activity, GO:0042542 - response to hydrogen peroxide, GO:0042335 - cuticle development, GO:0030104 - water homeostasis, GO:0016021 - integral to membrane, GO:0009555 - pollen development, GO:0009657 - plastid or…	TO:0000295 - chlorophyll-b content, TO:0000437 - male sterility, TO:0000621 - inflorescence development trait, TO:0000709 - leaf gloss, TO:0000276 - drought tolerance, TO:0000420 - fertility related trait, TO:0000496 - carotenoid content, TO:0000293 - chlorophyll-a content, TO:0000557 - secondary branch number, TO:0000040 - panicle length, TO:0000131 - leaf water potential, TO:0000449 - grain yie…	PO:0009049 - inflorescence , PO:0009066 - anther , PO:0001050 - leaf development stage , PO:0025034 - leaf , PO:0020048 - microspore , PO:0009051 - spikelet , PO:0009071 - anther wall tapetum , PO:0001007 - pollen development stage , PO:0001004 - anther development stage , PO:0001083 - inflorescence development stage
NPT, PH	LOC_Os02g40800	2	24724834	24725502	+	68038472, 67963433	expressed 20protein	QTN	IGKV_WS2021
NPT, PH	LOC_Os02g40810	2	24728245	24733171	-	68038472, 67963433	Zinc 20finger 2C 20ZZ 20type 20domain 20containing 20protein 2C 20expressed	QTN	IGKV_WS2021	RING233	OsRING233	RING-TYPE E3 UBIQUITIN LIGASE 233	RING-type E3 ubiquitin ligase 233			Os02g0621500
NPT, PH	LOC_Os02g40820	2	24736978	24739293	-	68038472, 67963433	expressed 20protein	QTN	IGKV_WS2021
NPT, PH	LOC_Os02g40830	2	24741749	24747965	+	68038472, 67963433	succinyl-CoA 20ligase 20beta-chain 2C 20mitochondrial 20precursor 2C 20putative 2C 20expressed	QTN	IGKV_WS2021	SCSB	OsSCSb	SUCCINYL-COA SYNTHETASE PROTEIN B-CHAIN	succinyl-CoA synthetase protein b-chain	SUCCINYL-COA SYNTHETASE PROTEIN B-CHAIN	Biochemical character, Tolerance and resistance - Disease resistance	Os02g0621700		GO:0050832 - defense response to fungus, GO:0004775 - succinate-CoA ligase (ADP-forming) activity, GO:0000287 - magnesium ion binding, GO:0005524 - ATP binding, GO:0005739 - mitochondrion, GO:0006099 - tricarboxylic acid cycle	TO:0000074 - blast disease
NPT, PH	LOC_Os02g40840	2	24749442	24754919	-	68038472, 67963433	alcohol 20oxidase 2C 20putative 2C 20expressed	QTN	IGKV_WS2021	HWH1	hwh1	HYBRID WEAKNESS H1	hybrid weakness h1	GMC OXIDOREDUCTASE	Reproductive organ - Pollination, fertilization, fertility - Hybrid weakness	Os02g0621800		GO:0048544 - recognition of pollen, GO:0007275 - multicellular organismal development
NPT, PH	LOC_Os02g40860	2	24766807	24772750	+	68038472, 67963433	CK1_CaseinKinase_1.5 20- 20CK1 20includes 20the 20casein 20kinase 201 20kinases 2C 20expressed	QTN	IGKV_WS2021	HBD2	OsCKI1, CKI, hbd2, CKI1, LTG1, OsCKI1/LTRPK1, LTRPK1, OsLTRPK1, LSES1, OsLSES1	HYBRID BREAKDOWN 2	hybrid breakdown 2, rice casein Kinase I, casein kinase I, casein kinase I1, Low Temperature Growth 1, low-temperature response protein kinase 1, leaf starch excess and senescence 1	CASEIN KINASE I	Vegetative organ - Root, Reproductive organ - Pollination, fertilization, fertility - Hybrid weakness, Vegetative organ - Leaf, Biochemical character, Tolerance and resistance - Stress tolerance	Os02g0622100		GO:0009826 - unidimensional cell growth, GO:0007275 - multicellular organismal development, GO:0005634 - nucleus, GO:0005524 - ATP binding, GO:0005975 - carbohydrate metabolic process, GO:0009409 - response to cold, GO:0009738 - abscisic acid mediated signaling, GO:0009851 - auxin biosynthetic process, GO:0010150 - leaf senescence, GO:0004713 - protein tyrosine kinase activity, GO:0048364 - root …	TO:0000257 - root branching, TO:0000227 - root length, TO:0000326 - leaf color, TO:0000303 - cold tolerance, TO:0002672 - auxin content, TO:0000495 - chlorophyll content, TO:0000293 - chlorophyll-a content, TO:0000295 - chlorophyll-b content, TO:0000163 - auxin sensitivity, TO:0000615 - abscisic acid sensitivity, TO:0000401 - plant growth hormone sensitivity, TO:0000696 - starch content, TO:00002…	PO:0009005 - root , PO:0020125 - elongation zone , PO:0001054 - 4 leaf senescence stage
NPT, PH	LOC_Os02g40870	2	24773421	24775080	-	68038472, 67963433	phosphatidylinositol 20N-acetylglucosaminyltransferase 20subunit 20C 2C 20putative 2C 20expressed	QTN	IGKV_WS2021
NPT, PH	LOC_Os02g40880	2	24777727	24779637	-	68038472, 67963433	ribosomal 20protein 20L14 2C 20putative 2C 20expressed	QTN	IGKV_WS2021	_	OsRPL14, RPL14	_	ribosomal protein L14, ribosomal protein large subunit 14		Other, Tolerance and resistance - Stress tolerance, Tolerance and resistance - Disease resistance	Os02g0622300		GO:0003735 - structural constituent of ribosome, GO:0022625 - cytosolic large ribosomal subunit, GO:0009409 - response to cold, GO:0009751 - response to salicylic acid stimulus, GO:0009753 - response to jasmonic acid stimulus, GO:0042273 - ribosomal large subunit biogenesis, GO:0042542 - response to hydrogen peroxide, GO:0042742 - defense response to bacterium, GO:0009414 - response to water depr…	TO:0000276 - drought tolerance, TO:0000303 - cold tolerance, TO:0000175 - bacterial blight disease resistance, TO:0002657 - oxidative stress, TO:0000259 - heat tolerance, TO:0000172 - jasmonic acid sensitivity	PO:0020032 - plumule , PO:0020103 - flag leaf , PO:0009089 - endosperm , PO:0009046 - flower , PO:0009006 - shoot system , PO:0009005 - root
NPT, PH	LOC_Os02g40890	2	24780566	24782489	+	68038472, 67963433	GLTP 20domain 20containing 20protein 2C 20putative 2C 20expressed	QTN	IGKV_WS2021
NPT, PH	LOC_Os02g40900	2	24783195	24786565	-	68038472, 67963433	RNA 20recognition 20motif 20containing 20protein 2C 20putative 2C 20expressed	QTN	IGKV_WS2021
NPT, PH	LOC_Os02g40910	2	24789531	24790065	-	68038472, 67963433	hypothetical 20protein	QTN	IGKV_WS2021
NPT	LOC_Os02g40920	2	24795232	24798456	+	68038472	transposon 20protein 2C 20putative 2C 20CACTA 2C 20En 2FSpm 20sub-class 2C 20expressed	QTN	IGKV_WS2021
NPT	LOC_Os02g40930	2	24801352	24804309	+	68038472	transposon 20protein 2C 20putative 2C 20CACTA 2C 20En 2FSpm 20sub-class	QTN	IGKV_WS2021
NPT	LOC_Os02g41450	2	24816732	24819818	+	68038472	no 20apical 20meristem 20protein 2C 20putative 2C 20expressed	QTN	IGKV_WS2021	NAC51	ONAC051, ONAC51	NAC DOMAIN-CONTAINING PROTEIN 51	NAC domain-containing protein 051, NAC domain-containing protein 51	NAC DOMAIN-CONTAINING PROTEIN 51	Other	Os02g0623300		GO:0009609 - response to symbiotic bacterium, GO:0009617 - response to bacterium, GO:0006355 - regulation of transcription, DNA-dependent, GO:0003677 - DNA binding
NPT	LOC_Os03g19140	3	10724042	10724707	+	89938112	retrotransposon 20protein 2C 20putative 2C 20unclassified 2C 20expressed	nongenic	ISARC
NPT	LOC_Os03g19150	3	10732265	10735310	-	89938112	retrotransposon 20protein 2C 20putative 2C 20unclassified 2C 20expressed	nongenic	ISARC
NPT	LOC_Os03g27080	3	15504379	15507731	+	94766882 , 94719121	calmodulin-binding 20transcription 20activator 202 2C 20putative 2C 20expressed	nongenic	WS21	_		_	CaM-binding transcription factor homolog, OsCBT homolog, CBT homolog			Os03g0388500
NPT	LOC_Os03g27090	3	15512510	15514115	-	94766882 , 94719121	MYB 20family 20transcription 20factor 2C 20putative 2C 20expressed	nongenic	WS21	2R_MYB38	OsMYB5, MYB5, Os2R_MYB38	R2R3-MYB TRANSCRIPTION FACTOR 38	myb transcription factor 5, R2R3-MYB Transcription Factor 38	R2R3-MYB TRANSCRIPTION FACTOR 38	Tolerance and resistance - Stress tolerance	Os03g0388600		GO:0003677 - DNA binding, GO:0016021 - integral to membrane
NPT	LOC_Os03g27150	3	15543544	15546774	-	94766882 , 94719121	retrotransposon 20protein 2C 20putative 2C 20Ty3-gypsy 20subclass 2C 20expressed	nongenic	WS21
NPT	LOC_Os03g27160	3	15560488	15562561	+	94766882 , 94719121	expressed 20protein	nongenic	WS21
NPT	LOC_Os04g35480	4	21591640	21595329	-	137255444	CDK5RAP1 2C 20putative 2C 20expressed	QTN	ISARC_WS2021
NPT	LOC_Os04g35490	4	21595744	21597815	+	137255444	expressed 20protein	QTN	ISARC_WS2021	_	OsEnS-66	_	endosperm-specific gene 66			Os04g0434400
NPT	LOC_Os04g35510	4	21609373	21611533	-	137255444	CENP-E-like 20kinetochore 20protein 2C 20putative 2C 20expressed	QTN	ISARC_WS2021
NPT	LOC_Os04g35520	4	21622953	21627315	-	137255444	OsAPx7 20- 20Stromal 20Ascorbate 20Peroxidase 20encoding 20gene 205 2C8 2C 20expressed	QTN	ISARC_WS2021	APX7	OsAPx7, OsAPx07, OSAPX7, APx7, sAPX	ASCORBATE PEROXIDASE 7	ascorbate peroxidase 7, stromal Ascorbate Peroxidase	ASCORBATE PEROXIDASE 7	Biochemical character, Vegetative organ - Leaf, Tolerance and resistance - Stress tolerance, Tolerance and resistance - Disease resistance	Os04g0434800		GO:0055114 - oxidation reduction, GO:0006801 - superoxide metabolic process, GO:0016688 - L-ascorbate peroxidase activity, GO:0030104 - water homeostasis, GO:0009414 - response to water deprivation, GO:0010118 - stomatal movement, GO:0042742 - defense response to bacterium, GO:0009651 - response to salt stress, GO:0009570 - chloroplast stroma, GO:0020037 - heme binding, GO:0042744 - hydrogen pero…	TO:0000276 - drought tolerance, TO:0000504 - leaf temperature, TO:0000175 - bacterial blight disease resistance, TO:0002657 - oxidative stress, TO:0000136 - relative water content, TO:0006001 - salt tolerance, TO:0001017 - water use efficiency
NPT	LOC_Os04g35530	4	21629566	21632840	+	137255444	expressed 20protein	QTN	ISARC_WS2021
NPT	LOC_Os04g35540	4	21637782	21642647	+	137255444	amino 20acid 20permease 20family 20protein 2C 20putative 2C 20expressed	QTN	ISARC_WS2021	_	OsBAT7	_	bi-directional amino acid transporter 7		Biochemical character	Os04g0435100		GO:0015171 - amino acid transmembrane transporter activity, GO:0016021 - integral to membrane
NPT	LOC_Os04g35560	4	21662078	21664360	-	137255444	glutathione 20S-transferase 2C 20putative 2C 20expressed	QTN	ISARC_WS2021	TCHQD1	OsTCHQD1	TETRACHLOROHYDROQUINONE DEHYDROGENASE 1	Glutathione S-transferase	TETRACHLOROHYDROQUINONE DEHYDROGENASE 1	Biochemical character	Os04g0435500
NPT	LOC_Os04g36590	4	22074971	22077951	+	137747346	transposon 20protein 2C 20putative 2C 20unclassified 2C 20expressed	QTN	ISARC_WS2020
NPT	LOC_Os04g36600	4	22078631	22079516	-	137747346	DUF538 20domain 20containing 20protein 2C 20putative 2C 20expressed	QTN	ISARC_WS2020
NPT	LOC_Os04g36610	4	22081905	22084258	-	137747346	endoglucanase 2C 20putative 2C 20expressed	QTN	ISARC_WS2020	GH9B4	OsGH9B4	GLYCOSIDE HYDROLASE 9B4	glycoside hydrolase OsGH9B4, glycoside hydrolase 9B4	GLYCOSIDE HYDROLASE 9B4	Biochemical character	Os04g0443300		GO:0005576 - extracellular region, GO:0005886 - plasma membrane, GO:0008810 - cellulase activity, GO:0009505 - plant-type cell wall, GO:0030245 - cellulose catabolic process
NPT	LOC_Os04g36620	4	22087648	22093469	+	137747346	hydrolase 2C 20alpha 2Fbeta 20fold 20family 20domain 20containing 20protein 2C 20expressed	QTN	ISARC_WS2020
NPT	LOC_Os04g36630	4	22095006	22097462	-	137747346	expressed 20protein	QTN	ISARC_WS2020
NPT	LOC_Os04g36660	4	22149759	22155396	+	137747346	calmodulin 20binding 20protein 2C 20putative 2C 20expressed	QTN	ISARC_WS2020	CAM	OsCaM	CALMODULIN	calmodulin	CALMODULIN	Biochemical character	Os04g0444200
NPT	LOC_Os04g36670	4	22157298	22159246	+	137747346	expressed 20protein	QTN	ISARC_WS2020	_	OsARGOS	_				Os04g0444300		GO:0005783 - endoplasmic reticulum, GO:0005634 - nucleus, GO:0005737 - cytoplasm, GO:0007275 - multicellular organismal development, GO:0008284 - positive regulation of cell proliferation, GO:0016020 - membrane, GO:0016021 - integral to membrane, GO:0030307 - positive regulation of cell growth, GO:0046622 - positive regulation of organ growth, GO:0071365 - cellular response to auxin stimulus
NPT	LOC_Os04g36680	4	22161607	22166249	-	137747346	MLO 20domain 20containing 20protein 2C 20putative 2C 20expressed	QTN	ISARC_WS2020	MLO_	OsMLO5, MLO5	POWDERY-MILDEW-RESISTANCE GENE O_	powdery-MiLdew-resistance gene O5, Mildew resistance Locus O-5	POWDERY-MILDEW-RESISTANCE PROTEIN O_	Tolerance and resistance - Disease resistance	Os04g0444400		GO:0016021 - integral to membrane, GO:0008219 - cell death
NPT	LOC_Os04g36700	4	22168281	22171089	+	137747346	proteasome 20subunit 2C 20putative 2C 20expressed	QTN	ISARC_WS2020	RPN6	OsRpn6, Rpn6	19S REGULATORY PARTICLE NON-ATPASE SUBUNIT 6	19S regulatory particle non-ATPase subunit 6, RP non-ATPase 6	19S REGULATORY PARTICLE NON-ATPASE SUBUNIT 6	Biochemical character	Os04g0444600		GO:0000502 - proteasome complex
NPT	LOC_Os04g37830	4	22489000	22491112	+	138112760 , 138133818	retrotransposon 20protein 2C 20putative 2C 20unclassified 2C 20expressed	genic	WS21
NPT	LOC_Os04g37840	4	22494649	22499199	-	138112760 , 138133818	retrotransposon 20protein 2C 20putative 2C 20Ty3-gypsy 20subclass 2C 20expressed	nongenic	WS21
NPT	LOC_Os04g37850	4	22517356	22520652	+	138112760 , 138133818	transposon 20protein 2C 20putative 2C 20CACTA 2C 20En 2FSpm 20sub-class 2C 20expressed	nongenic	WS21
NPT	LOC_Os04g38930	4	23131673	23133502	+	138755490 , 138783576	pentatricopeptide 2C 20putative 2C 20expressed	genic	WS20
NPT	LOC_Os04g38990	4	23159815	23161767	+	138755490 , 138783576	expressed 20protein	genic	WS20
NPT	LOC_Os04g39020	4	23171426	23176369	-	138796455 , 138783576	aldehyde 20dehydrogenase 2C 20putative 2C 20expressed	genic	WS20	BAD1	Badh1, badh1, BAD1, BADH1, OsBADH1, BADH, OsALDH10A5, ALDH10A5	BETAINE ALDEHYDE DEHYDROGENASE 1	betaine aldehyde dehydrogenase 1, Aldehyde dehydrogenase 10A5	BETAINE ALDEHYDE DEHYDROGENASE 1	Tolerance and resistance - Stress tolerance, Biochemical character, Seed - Physiological traits - Taste	Os04g0464200		GO:0010728 - regulation of hydrogen peroxide biosynthetic process, GO:0009651 - response to salt stress, GO:0005777 - peroxisome, GO:0009414 - response to water deprivation, GO:0009413 - response to flooding, GO:0009416 - response to light stimulus, GO:0008802 - betaine-aldehyde dehydrogenase activity, GO:0009408 - response to heat, GO:0019285 - glycine betaine biosynthetic process from choline, …	TO:0006001 - salt tolerance, TO:0000087 - aroma, TO:0000303 - cold tolerance, TO:0000276 - drought tolerance, TO:0000075 - light sensitivity, TO:0000259 - heat tolerance, TO:0000286 - submergence sensitivity
NPT	LOC_Os05g28630	5	16781886	16786652	-	167950121 , 167922152	leaf 20senescence 20related 20protein 2C 20putative 2C 20expressed	nongenic	WS20	XOAT5	OsTBL13, TBL13, OsXOAT5	XYLAN O-ACETYLTRANSFERASE 5	trichome birefringence-like 13, xylan O-acetyltransferase 5	XYLAN O-ACETYLTRANSFERASE 5	Biochemical character	Os05g0354400		GO:0005794 - Golgi apparatus, GO:0016021 - integral to membrane, GO:0016413 - O-acetyltransferase activity
NPT	LOC_Os05g28650	5	16811872	16812120	-	167950121 , 167922152	expressed 20protein	nongenic	WS20
NPT	LOC_Os05g28680	5	16821290	16827004	-	167950121 , 167922152	retrotransposon 20protein 2C 20putative 2C 20unclassified 2C 20expressed	genic	WS20
NPT	LOC_Os05g40384	5	23728502	23738405	+	174897864	cytochrome 20P450 2C 20putative 2C 20expressed	QTN	ISAH_WS2020	EUI1	eui1, GA16, 17ox, CYP714D1, EUI, CYP714D1/EUI, OsEUI, LG5, OsLG5	ELONGATED UPPERMOST INTERNODE 1	elongated uppermost internode, elongated uppermost internode-1, Elongation of Upper most Internode, ELONGATED UPPERMOST INTERNODE1, dwarf Eui1, long grain 5	CYTOCHROME CYP714D1	Vegetative organ - Culm, Vegetative organ - Leaf, Reproductive organ - panicle, Seed - Morphological traits - Grain shape, Character as QTL - Yield and productivity, Tolerance and resistance - Stress tolerance	Os05g0482400	125	GO:0007275 - multicellular organismal development, GO:0009651 - response to salt stress, GO:0009685 - gibberellin metabolic process, GO:0010106 - cellular response to iron ion starvation, GO:0009826 - unidimensional cell growth, GO:0016023 - cytoplasmic membrane-bounded vesicle, GO:0045487 - gibberellin catabolic process, GO:0032940 - secretion by cell, GO:0010229 - inflorescence development, GO:…	TO:0000576 - stem length, TO:0000040 - panicle length, TO:0001002 - inflorescence exsertion, TO:0006001 - salt tolerance, TO:0000397 - grain size, TO:0000124 - flag leaf angle, TO:0002675 - gibberellic acid content, TO:0000734 - grain length, TO:0000621 - inflorescence development trait, TO:0000382 - 1000-seed weight, TO:0000145 - internode length, TO:0000224 - iron sensitivity, TO:0000207 - plan…	PO:0020104 - leaf sheath , PO:0020103 - flag leaf , PO:0020142 - stem internode , PO:0009047 - stem , PO:0009049 - inflorescence , PO:0007089 - stem elongation stage , PO:0007112 - 1 main shoot growth stage , PO:0001083 - inflorescence development stage
NPT	LOC_Os05g40410	5	23743472	23747595	+	174897864	expressed 20protein	QTN	ISAH_WS2020
NPT	LOC_Os05g40440	5	23756882	23760926	-	174897864	retrotransposon 20protein 2C 20putative 2C 20LINE 20subclass 2C 20expressed	QTN	ISAH_WS2020
NPT	LOC_Os05g40450	5	23761789	23763003	+	174897864	expressed 20protein	QTN	ISAH_WS2020	_	Os_F0729	_
NPT	LOC_Os05g40460	5	23766495	23768876	-	174897864	retrotransposon 20protein 2C 20putative 2C 20unclassified 2C 20expressed	QTN	ISAH_WS2020
NPT	LOC_Os05g40470	5	23769242	23770935	-	174897864	retrotransposon 20protein 2C 20putative 2C 20unclassified 2C 20expressed	QTN	ISAH_WS2020
NPT	LOC_Os05g40480	5	23771653	23774985	-	174897864	retrotransposon 20protein 2C 20putative 2C 20Ty3-gypsy 20subclass 2C 20expressed	QTN	ISAH_WS2020
NPT	LOC_Os05g40490	5	23778150	23781906	-	174897864	zinc 20knuckle 20domain 20containing 20protein 2C 20expressed	QTN	ISAH_WS2020
NPT	LOC_Os05g40500	5	23783787	23787925	-	174897864	F-box 20domain 20containing 20protein 2C 20expressed	QTN	ISAH_WS2020	_	OsFbox262, Os_F0703	_	F-box protein 262
NPT	LOC_Os05g40510	5	23788811	23790004	+	174897864	expressed 20protein	QTN	ISAH_WS2020
NPT	LOC_Os05g40540	5	23798402	23800288	-	174897864	expressed 20protein	QTN	ISAH_WS2020
NPT	LOC_Os05g40550	5	23801397	23803149	-	174897864	expressed 20protein	QTN	ISAH_WS2020
NPT	LOC_Os05g40560	5	23803321	23803874	+	174897864	retrotransposon 20protein 2C 20putative 2C 20unclassified 2C 20expressed	QTN	ISAH_WS2020
NPT	LOC_Os05g40580	5	23808882	23810048	+	174897864	expressed 20protein	QTN	ISAH_WS2020
NPT	LOC_Os05g40590	5	23811427	23813002	-	174897864	expressed 20protein	QTN	ISAH_WS2020	_	Os_F0787	_
NPT	LOC_Os05g40610	5	23818257	23819431	-	174897864	OsFBDUF25 20- 20F-box 20and 20DUF 20domain 20containing 20protein 2C 20expressed	QTN	ISAH_WS2020	_	OsFbox264, Os_F0554	_	F-box protein 264
NPT	LOC_Os05g40620	5	23820381	23822094	+	174897864	expressed 20protein	QTN	ISAH_WS2020
NPT	LOC_Os05g46610	5	26987334	26989077	+	178147366	myb-like 20DNA-binding 20domain 20containing 20protein 2C 20putative 2C 20expressed	QTN	ISARC_WS2021	RLM1	OsMYB86-L2, MYB86-L2, OsRLM1, Os2R_MYB59, 2R_MYB59	ROLLING LEAF MUTANT 1	rolling-leaf mutant 1, R2R3-MYB Transcription Factor 59	ROLLING LEAF MUTANT 1	Vegetative organ - Leaf, Vegetative organ - Culm, Character as QTL - Yield and productivity, Other	Os05g0543600		GO:0003677 - DNA binding, GO:0005634 - nucleus, GO:0003700 - transcription factor activity, GO:0009834 - secondary cell wall biogenesis	TO:0000447 - filled grain number, TO:0000207 - plant height, TO:0000449 - grain yield per plant, TO:0000326 - leaf color, TO:0000731 - lignin content	PO:0009047 - stem
NPT	LOC_Os05g46620	5	26991242	26995161	-	178147366	chaperone 20protein 20dnaJ 2010 2C 20putative 2C 20expressed	QTN	ISARC_WS2021	_	OsDjC51	_	DnaJ domain protein C51			Os05g0543700
NPT	LOC_Os05g46630	5	26995734	26999172	-	178147366	expressed 20protein	QTN	ISARC_WS2021
NPT	LOC_Os05g46640	5	26999637	27000622	+	178147366	expressed 20protein	QTN	ISARC_WS2021
NPT	LOC_Os05g46660	5	27005760	27007682	+	178147366	transposon 20protein 2C 20putative 2C 20Mutator 20sub-class	QTN	ISARC_WS2021
NPT	LOC_Os05g46680	5	27018553	27019166	-	178147366	retrotransposon 20protein 2C 20putative 2C 20unclassified	QTN	ISARC_WS2021
NPT	LOC_Os05g46690	5	27024974	27027115	-	178147366	expressed 20protein	QTN	ISARC_WS2021
NPT	LOC_Os05g46710	5	27036918	27039220	-	178147366	expressed 20protein	QTN	ISARC_WS2021
NPT	LOC_Os05g46720	5	27043318	27048568	+	178147366	phosphatidylinositol 20transfer 2C 20putative 2C 20expressed	QTN	ISARC_WS2021	SNDP6	OsSNDP6, OsSec14-16, Sec14-16	SEC14-NODULIN DOMAIN PROTEIN 6	Sec14-nodulin domain-containing protein 6, Sec14-nodulin domain protein 6, SEC14 domain protein 16, Sec14 protein 16	SEC14-NODULIN DOMAIN PROTEIN 6	Tolerance and resistance - Disease resistance, Biochemical character	Os05g0545000		GO:0016021 - integral to membrane, GO:0050832 - defense response to fungus, GO:0005215 - transporter activity, GO:0016020 - membrane, GO:0005622 - intracellular	TO:0000074 - blast disease
NPT	LOC_Os05g46740	5	27057383	27063217	-	178147366	regulator 20of 20chromosome 20condensation 2C 20putative 2C 20expressed	QTN	ISARC_WS2021
NPT	LOC_Os05g46750	5	27067365	27070015	-	178147366	STE_MEKK_ste11_MAP3K.18 20- 20STE 20kinases 20include 20homologs 20to 20sterile 207 2C 20sterile 2011 20and 20sterile 2020 20from 20yeast 2C 20expressed	QTN	ISARC_WS2021	_		_	Serine/threonine protein kinase domain containing protein		Tolerance and resistance - Stress tolerance	Os05g0545300		GO:0042981 - regulation of apoptosis, GO:0005737 - cytoplasm, GO:0051403 - stress-activated MAPK cascade, GO:0007346 - regulation of mitotic cell cycle, GO:0032147 - activation of protein kinase activity, GO:0000186 - activation of MAPKK activity, GO:0004709 - MAP kinase kinase kinase activity, GO:0005524 - ATP binding, GO:0009414 - response to water deprivation	TO:0000276 - drought tolerance
NPT	LOC_Os05g48990	5	28100295	28105340	+	179271153	homeobox 20domain 20containing 20protein 2C 20expressed	QTN	IGKV_WS2021	WOX9C	OsWOX9C, DWL2, OsDWL2, DWL2/WOX9C	WUSCHEL-LIKE HOMEOBOX 9C	WUSCHEL-related homeobox 9C, DWT-LIKE 2	WUSCHEL-LIKE HOMEOBOX 9C	Reproductive organ - panicle, Other, Vegetative organ - Culm, Character as QTL - Yield and productivity	Os05g0564500		GO:0043565 - sequence-specific DNA binding, GO:0005634 - nucleus, GO:0010229 - inflorescence development, GO:0006351 - transcription, DNA-dependent, GO:0003700 - transcription factor activity, GO:0007275 - multicellular organismal development	TO:0000621 - inflorescence development trait, TO:0000346 - tiller number, TO:0000145 - internode length, TO:0000207 - plant height, TO:0000428 - callus induction, TO:0006036 - stem elongation, TO:0000396 - grain yield	PO:0007089 - stem elongation stage , PO:0001083 - inflorescence development stage
NPT	LOC_Os05g49000	5	28107291	28108898	+	179271153	expressed 20protein	QTN	IGKV_WS2021
NPT	LOC_Os05g49020	5	28112620	28115004	+	179271153	60S 20ribosomal 20protein 20L18a-1 2C 20putative 2C 20expressed	QTN	IGKV_WS2021
NPT	LOC_Os05g49030	5	28118285	28120495	+	179271153	60S 20ribosomal 20protein 20L18a 2C 20putative 2C 20expressed	QTN	IGKV_WS2021	RPL18A	rpl18a, RPL18a, OsRPL18a	RIBOSOMAL PROTEIN L18A	ribosomal protein L18a	RIBOSOMAL PROTEIN L18A	Tolerance and resistance - Stress tolerance, Other, Tolerance and resistance - Disease resistance	Os05g0565000		GO:0009408 - response to heat, GO:0016020 - membrane, GO:0003723 - RNA binding, GO:0009753 - response to jasmonic acid stimulus, GO:0022625 - cytosolic large ribosomal subunit, GO:0003735 - structural constituent of ribosome, GO:0009414 - response to water deprivation, GO:0042742 - defense response to bacterium, GO:0009751 - response to salicylic acid stimulus, GO:0009409 - response to cold, GO:0…	TO:0000303 - cold tolerance, TO:0000172 - jasmonic acid sensitivity, TO:0000276 - drought tolerance, TO:0000432 - temperature response trait, TO:0000259 - heat tolerance, TO:0000175 - bacterial blight disease resistance	PO:0009005 - root , PO:0009089 - endosperm , PO:0025034 - leaf , PO:0009006 - shoot system
NPT	LOC_Os05g49050	5	28125211	28128402	+	179271153	CobW 2FP47K 20family 20protein 2C 20putative 2C 20expressed	QTN	IGKV_WS2021	_	UreG, OsUreG	_	urease accessory protein UreG			Os05g0565200		GO:0005737 - cytoplasm, GO:0048554 - positive regulation of metalloenzyme activity, GO:0005524 - ATP binding, GO:0016020 - membrane, GO:0016530 - metallochaperone activity, GO:0003924 - GTPase activity, GO:0016151 - nickel ion binding
NPT	LOC_Os05g49060	5	28128414	28131204	-	179271153	uncharacterized 20protein 20ycf23 2C 20putative 2C 20expressed	QTN	IGKV_WS2021
NPT	LOC_Os05g49070	5	28131776	28133217	-	179271153	dehydrogenase 2C 20putative 2C 20expressed	QTN	IGKV_WS2021
NPT	LOC_Os05g49080	5	28133224	28134047	-	179271153	expressed 20protein	QTN	IGKV_WS2021
NPT	LOC_Os05g49090	5	28136531	28139366	+	179271153	retrotransposon 20protein 2C 20putative 2C 20Ty3-gypsy 20subclass	QTN	IGKV_WS2021
NPT	LOC_Os05g49100	5	28154693	28157989	+	179271153	WRKY49 2C 20expressed	QTN	IGKV_WS2021	WRKY49	OsWRKY49	WRKY GENE 49	Rice WRKY gene49	TRANSCRIPTION FACTOR WRKY49	Vegetative organ - Leaf, Tolerance and resistance - Disease resistance	Os05g0565900		GO:0042742 - defense response to bacterium, GO:0010150 - leaf senescence, GO:0003700 - transcription factor activity, GO:0006952 - defense response, GO:0007568 - aging, GO:0043565 - sequence-specific DNA binding	TO:0000175 - bacterial blight disease resistance, TO:0000249 - leaf senescence	PO:0001054 - 4 leaf senescence stage
NPT	LOC_Os05g49110	5	28164754	28168896	-	179271153	retrotransposon 20protein 2C 20putative 2C 20Ty1-copia 20subclass 2C 20expressed	QTN	IGKV_WS2021
NPT	LOC_Os05g49120	5	28176577	28182471	+	179271153	NLI 20interacting 20factor-like 20phosphatase 2C 20putative 2C 20expressed	QTN	IGKV_WS2021
NPT	LOC_Os05g49130	5	28183127	28188697	+	179271153	16S 20rRNA 20processing 20protein 20RimM 20containing 20protein 2C 20expressed	QTN	IGKV_WS2021
NPT	LOC_Os05g49140	5	28188762	28194025	-	179271153	CGMC_MAPKCMGC_2.8 20- 20CGMC 20includes 20CDA 2C 20MAPK 2C 20GSK3 2C 20and 20CLKC 20kinases 2C 20expressed	QTN	IGKV_WS2021	MPK7	OsMPK7, OsMAPK44, MAPK44, OsMAPK20-5, MAPK20-5	MITOGEN-ACTIVATED PROTEIN KINASE 7	mitogen-activated protein kinase 7	MITOGEN-ACTIVATED PROTEIN KINASE 7	Tolerance and resistance - Stress tolerance, Tolerance and resistance - Insect resistance, Biochemical character	Os05g0566400		GO:0002213 - defense response to insect, GO:0009873 - ethylene mediated signaling pathway, GO:0009414 - response to water deprivation, GO:0050832 - defense response to fungus, GO:0007263 - nitric oxide mediated signal transduction, GO:0009814 - defense response, incompatible interaction, GO:0009611 - response to wounding, GO:0009723 - response to ethylene stimulus, GO:0009409 - response to cold, …	TO:0000303 - cold tolerance, TO:0000276 - drought tolerance, TO:0000173 - ethylene sensitivity, TO:0000615 - abscisic acid sensitivity, TO:0000255 - sheath blight disease resistance, TO:0000074 - blast disease, TO:0000205 - white-backed planthopper resistance, TO:0000424 - brown planthopper resistance, TO:0000172 - jasmonic acid sensitivity
NPT	LOC_Os05g50360	5	28854805	28857818	+	180025260	anaphase-promoting 20complex 20subunit 2010 2C 20putative 2C 20expressed	QTN	ISARC_WS2020	_	APC10	_	anaphase-promoting complex subunit 10, ANAPHASE PROMOTING COMPLEX 10		Reproductive organ - Pollination, fertilization, fertility - Meiosis	Os05g0579800		GO:0007276 - gamete generation, GO:0032876 - negative regulation of DNA endoreduplication, GO:0007126 - meiosis, GO:0051301 - cell division, GO:0031145 - anaphase-promoting complex-dependent proteasomal ubiquitin-dependent protein catabolic process, GO:0008283 - cell proliferation, GO:0007067 - mitosis, GO:0010087 - phloem or xylem histogenesis, GO:0030071 - regulation of mitotic metaphase/anapha…
NPT	LOC_Os05g50370	5	28864052	28871102	+	180025260	dnaJ 20domain 20containing 20protein 2C 20expressed	QTN	ISARC_WS2020	_	OsDjC52	_	DnaJ domain protein C52			Os05g0579900
NPT	LOC_Os05g50380	5	28871794	28877277	-	180025260	glucose-1-phosphate 20adenylyltransferase 20large 20subunit 2C 20chloroplast 20precursor 2C 20putative 2C 20expressed	QTN	ISARC_WS2020	AGPL3	OsAGPL3, APL3, OsAPL3, AGPlar, OsAGPL1, AGPL1	ADP-GLUCOSE PYROPHOSPHORYLASE LARGE SUBUNIT 3	sativa ADP-glucose pyrophosphorylase large subunit 3, ADP-glucose Pyrophosphorylase large subunit 3, AGPase large subunit 3, AGPase large unit 1, AGPase L1	ADP-GLUCOSE PYROPHOSPHORYLASE LARGE SUBUNIT 3	Tolerance and resistance - Stress tolerance, Biochemical character	Os05g0580000		GO:0009058 - biosynthetic process, GO:0009413 - response to flooding, GO:0019252 - starch biosynthetic process, GO:0008878 - glucose-1-phosphate adenylyltransferase activity, GO:0016779 - nucleotidyltransferase activity, GO:0009536 - plastid	TO:0000286 - submergence sensitivity	PO:0000074 - parenchyma cell , PO:0005020 - vascular bundle , PO:0009066 - anther , PO:0004006 - mesophyll cell , PO:0020104 - leaf sheath , PO:0025034 - leaf , PO:0009047 - stem , PO:0009089 - endosperm
NPT	LOC_Os05g50390	5	28880514	28881393	-	180025260	expressed 20protein	QTN	ISARC_WS2020
NPT	LOC_Os05g50410	5	28889622	28896998	+	180025260	Rad21 20 2F 20Rec8 20like 20protein 2C 20putative 2C 20expressed	QTN	ISARC_WS2020	RAD21-4	OsRad21-4, REC8, OsREC8, OsRAD21-4	RAD21-4 PROTEIN	Rad21-4 protein, RECombination 8	RAD21-4 PROTEIN	Reproductive organ - Pollination, fertilization, fertility - Meiosis, Biochemical character	Os05g0580500		GO:0003682 - chromatin binding, GO:0007062 - sister chromatid cohesion, GO:0000798 - nuclear cohesin complex, GO:0000228 - nuclear chromosome, GO:0006302 - double-strand break repair
NPT	LOC_Os05g50420	5	28897434	28912195	-	180025260	retrotransposon 20protein 2C 20putative 2C 20unclassified 2C 20expressed	QTN	ISARC_WS2020
NPT	LOC_Os05g50440	5	28912635	28919060	+	180025260	expressed 20protein	QTN	ISARC_WS2020
NPT	LOC_Os05g50450	5	28919968	28921326	-	180025260	expressed 20protein	QTN	ISARC_WS2020
NPT	LOC_Os05g50480	5	28940141	28948384	+	180025260	protein 20of 20unknown 20function 20DUF1296 20domain 20containing 20protein 2C 20expressed	QTN	ISARC_WS2020
NPT	LOC_Os06g10850	6	5657850	5661265	+	186790725	lipase 2C 20putative 2C 20expressed	QTN	ISAH_WS2020
NPT	LOC_Os06g10860	6	5663968	5665309	+	186790725	glucosyltransferase 2C 20putative 2C 20expressed	QTN	ISAH_WS2020
NPT	LOC_Os06g10870	6	5665965	5667013	-	186790725	retrotransposon 20protein 2C 20putative 2C 20unclassified 2C 20expressed	QTN	ISAH_WS2020
NPT	LOC_Os06g10880	6	5677080	5682126	+	186790725	bZIP 20transcription 20factor 2C 20putative 2C 20expressed	QTN	ISAH_WS2020	BZIP46	ABL1, bZIP46, OsABL1, OsbZIP46, OsAREB8, OsABF2, OsABF3, OsbZIP46CA1, OsZIP46, ZIP46, OsbZIP46/OsABF2	b-ZIP TRANSCRIPTION FACTOR 46	ABI5-like1, bZIP transcription factor 46, AREB/ABF-family transcription factor OsAREB8, AREB/ABF-family protein 8, ABA-responsive element binding factor 2	b-ZIP TRANSCRIPTION FACTOR 46	Other, Tolerance and resistance - Stress tolerance	Os06g0211200		GO:0009737 - response to abscisic acid stimulus, GO:0005634 - nucleus, GO:0009753 - response to jasmonic acid stimulus, GO:0003700 - transcription factor activity, GO:0046983 - protein dimerization activity, GO:0043565 - sequence-specific DNA binding, GO:0009414 - response to water deprivation, GO:0009789 - positive regulation of abscisic acid mediated signaling	TO:0000172 - jasmonic acid sensitivity, TO:0000432 - temperature response trait, TO:0000615 - abscisic acid sensitivity, TO:0000188 - drought sensitivity, TO:0000276 - drought tolerance, TO:0000429 - salt sensitivity
NPT	LOC_Os06g10890	6	5688535	5690095	+	186790725	sterol 20carrier 20protein-2 2C 20putative 2C 20expressed	QTN	ISAH_WS2020
NPT	LOC_Os06g10910	6	5701639	5704991	+	186790725	xyloglucan 20fucosyltransferase 2C 20putative 2C 20expressed	QTN	ISAH_WS2020
NPT	LOC_Os06g10920	6	5705127	5707910	-	186790725	xyloglucan 20fucosyltransferase 2C 20putative 2C 20expressed	QTN	ISAH_WS2020
NPT	LOC_Os06g10930	6	5712154	5714660	-	186790725	xyloglucan 20fucosyltransferase 2C 20putative 2C 20expressed	QTN	ISAH_WS2020
NPT	LOC_Os06g10950	6	5718733	5720698	-	186790725	xyloglucan 20fucosyltransferase 2C 20putative 2C 20expressed	QTN	ISAH_WS2020
NPT	LOC_Os06g10960	6	5721756	5726745	+	186790725	xyloglucan 20fucosyltransferase 2C 20putative 2C 20expressed	QTN	ISAH_WS2020
NPT	LOC_Os06g10970	6	5732121	5734237	+	186790725	xyloglucan 20fucosyltransferase 2C 20putative 2C 20expressed	QTN	ISAH_WS2020
NPT	LOC_Os06g10990	6	5745188	5747209	-	186790725	DnaK 20family 20protein 2C 20putative 2C 20expressed	QTN	ISAH_WS2020	_	BiP3	_	IgG binding protein 3, ER stress-related gene BiP3			Os06g0212900		GO:0005524 - ATP binding
NPT	LOC_Os06g11390	6	6003866	6004179	-	187134195	expressed 20protein	QTN	ISAH_WS2021
NPT	LOC_Os06g11400	6	6007444	6010097	-	187134195	expressed 20protein	QTN	ISAH_WS2021
NPT	LOC_Os06g11410	6	6019597	6021861	+	187134195	cyclin 2C 20putative 2C 20expressed	QTN	ISAH_WS2021	CYCD2;2	CycD2;2, CycD2;os;2, Orysa;CycD2;2, Orysa;CYCD2;2, CyclinD3;1, OsCYCD2;1	CYCLIN-D2-2	D-type cyclin 2;2, Cyclin D3;1	CYCLIN-D2-2	Biochemical character	Os06g0217900		GO:0007049 - cell cycle, GO:0005634 - nucleus, GO:0051301 - cell division
NPT	LOC_Os06g11420	6	6027823	6029445	+	187134195	SKIP 2FSNW 20domain 20containing 20protein 2C 20expressed	QTN	ISAH_WS2021	SKIPB	OsSKIPb	SKI INTERACTING PROTEIN B		SKI INTERACTING PROTEIN B		Os06g0218000		GO:0000398 - nuclear mRNA splicing, via spliceosome, GO:0005681 - spliceosomal complex
NPT	LOC_Os06g11430	6	6032410	6035429	+	187134195	GRAM 20domain 20containing 20protein 2C 20expressed	QTN	ISAH_WS2021
NPT	LOC_Os06g11440	6	6036698	6050762	-	187134195	transposon 20protein 2C 20putative 2C 20Mutator 20sub-class 2C 20expressed	QTN	ISAH_WS2021
NPT	LOC_Os06g11450	6	6058726	6060541	-	187134195	zinc 20finger 2C 20C3HC4 20type 20domain 20containing 20protein 2C 20expressed	QTN	ISAH_WS2021	RING342	OsRING342	RING-TYPE E3 UBIQUITIN LIGASE 342	RING-type E3 ubiquitin ligase 342			Os06g0218300
NPT	LOC_Os06g11460	6	6066747	6071865	+	187134195	retrotransposon 20protein 2C 20putative 2C 20unclassified 2C 20expressed	QTN	ISAH_WS2021
NPT	LOC_Os06g11470	6	6074935	6075915	+	187134195	retrotransposon 20protein 2C 20putative 2C 20unclassified 2C 20expressed	QTN	ISAH_WS2021
NPT	LOC_Os06g11480	6	6081889	6083447	-	187134195	hypothetical 20protein	QTN	ISAH_WS2021
NPT	LOC_Os06g11490	6	6086798	6088248	+	187134195	plastocyanin-like 20domain 20containing 20protein 2C 20putative 2C 20expressed	QTN	ISAH_WS2021	UCL16	OsUCL16	UCLACYANIN-LIKE PROTEIN 16	uclacyanin-like protein 16	UCLACYANIN-LIKE PROTEIN 16		Os06g0218600		GO:0005507 - copper ion binding, GO:0009055 - electron carrier activity
NPT	LOC_Os06g11500	6	6086289	6097662	-	187134195	MCM9 20- 20Putative 20minichromosome 20maintenance 20MCM 20family 20subunit 209 2C 20expressed	QTN	ISAH_WS2021	MCM9	OsMCM9	MINI-CHROMOSOME MAINTENANCE PROTEIN 9	mini-chromosome maintenance protein 9	MINI-CHROMOSOME MAINTENANCE PROTEIN 9	Biochemical character	Os06g0218500		GO:0003677 - DNA binding, GO:0006260 - DNA replication, GO:0005524 - ATP binding
NPT	LOC_Os06g12600	6	6842811	6848564	+	187949315,187977004	kinase 2C 20pfkB 20family 2C 20putative 2C 20expressed	nongenic	ISAH	FRK3	OsFRK3	FRUCTOKINASE 3	Fructokinase 3	FRUCTOKINASE 3	Seed - Physiological traits - Storage substances, Character as QTL - Yield and productivity, Seed - Morphological traits - Grain shape	Os06g0232200		GO:0016051 - carbohydrate biosynthetic process, GO:0006633 - fatty acid biosynthetic process, GO:0006000 - fructose metabolic process, GO:0010431 - seed maturation, GO:0006109 - regulation of carbohydrate metabolic process, GO:0016301 - kinase activity, GO:0016773 - phosphotransferase activity, alcohol group as acceptor, GO:0016310 - phosphorylation, GO:0009507 - chloroplast, GO:0005829 - cytosol…	TO:0000590 - grain weight, TO:0000696 - starch content, TO:0000382 - 1000-seed weight, TO:0000399 - grain thickness, TO:0000328 - sucrose content, TO:0006005 - fructose content, TO:0006003 - oligosaccharide content	PO:0007632 - seed maturation stage
NPT	LOC_Os06g12610	6	6866393	6869521	+	187949315,187977004	auxin 20efflux 20carrier 20component 2C 20putative 2C 20expressed	nongenic	ISAH	PIN1A	PIN1C, OsPIN1C, OsPIN1c, OsPIN1a	PIN PROTEIN 1A	PIN PROTEIN 1C, pin-formed1a, pin-formed 1a	PIN PROTEIN 1A	Reproductive organ - Spikelet, flower, glume, awn, Vegetative organ - Root, Biochemical character, Tolerance and resistance - Stress tolerance	Os06g0232300		GO:0016021 - integral to membrane, GO:0048830 - adventitious root development, GO:0009735 - response to cytokinin stimulus, GO:0046686 - response to cadmium ion, GO:0055085 - transmembrane transport, GO:0048449 - floral organ formation, GO:0046685 - response to arsenic, GO:0009725 - response to hormone stimulus, GO:0009733 - response to auxin stimulus	TO:0000167 - cytokinin sensitivity, TO:0000031 - silicon sensitivity, TO:0000401 - plant growth hormone sensitivity, TO:0000578 - root fresh weight, TO:0000428 - callus induction, TO:0001006 - adventitious root number, TO:0006022 - floral organ development trait, TO:0000084 - root number, TO:0000011 - nitrogen sensitivity, TO:0000163 - auxin sensitivity	PO:0000019 - gynoecium primordium , PO:0009037 - lemma , PO:0007600 - floral organ differentiation stage , PO:0009066 - anther , PO:0008013 - anther vascular system , PO:0025488 - flower bract primordium
NPT	LOC_Os06g12630	6	6890585	6895644	-	187949315,187977004	glutathione 20S-transferase 2C 20N-terminal 20domain 20containing 20protein 2C 20expressed	genic	ISAH	DHAR2	OsDHAR2	DEHYDROASCORBATE REDUCTASE 2	DHAR classGLUTATHIONE S-TRANSFERASE 2	DEHYDROASCORBATE REDUCTASE 2	Biochemical character	Os06g0232600
NPT	LOC_Os06g19670	6	11228950	11233369	-	192316727 , 192315993	OsFBX196 20- 20F-box 20domain 20containing 20protein 2C 20expressed	nongenic	WS21	_	OsFbox308, Os_F0081, OsFBX196, FBX196	_	F-box protein 308, F-box-type E3 ubiquitin ligase X196			Os06g0300900
NPT	LOC_Os06g19680	6	11237429	11242834	-	192316727 , 192315993	zinc 20finger 2C 20C3HC4 20type 20domain 20containing 20protein 2C 20expressed	nongenic	WS21	MAL	HRD1, OsHrd1, Hrd1, OsMAL, OsRING9, RING9	MERISTEM ACTIVITYLESS	a homologue of yeast Hrd1, RING-type E3 ubiquitin ligase 9		Vegetative organ - Root, Biochemical character, Tolerance and resistance - Stress tolerance	Os06g0301000		GO:0048364 - root development, GO:0051781 - positive regulation of cell division, GO:0048509 - regulation of meristem development, GO:0005789 - endoplasmic reticulum membrane, GO:0016021 - integral to membrane, GO:0080036 - regulation of cytokinin mediated signaling, GO:0016874 - ligase activity, GO:0016567 - protein ubiquitination, GO:0008270 - zinc ion binding	TO:0000656 - root development trait, TO:0002685 - crown root number, TO:0002692 - root meristem development	PO:0007520 - root development stage
NPT	LOC_Os06g40050	6	23823461	23827296	-	204922206 , 204951639	mitochondrial 20carrier 20protein 2C 20putative 2C 20expressed	nongenic	WS20	BT1-3	OsBT1-3, SLA	BRITTLE 1-3	Brittle-1-3, seedling leaf albino	BRITTLE 1-3 PROTEIN	Coloration - Chlorophyll, Biochemical character, Vegetative organ - Leaf	Os06g0602700		GO:0009507 - chloroplast, GO:0009658 - chloroplast organization, GO:0006839 - mitochondrial transport, GO:0005982 - starch metabolic process, GO:0022891 - substrate-specific transmembrane transporter activity, GO:0009941 - chloroplast envelope, GO:0016021 - integral to membrane, GO:0015292 - uniporter activity, GO:0005743 - mitochondrial inner membrane, GO:0022857 - transmembrane transporter acti…	TO:0002715 - chloroplast development trait, TO:0000326 - leaf color
NPT	LOC_Os06g40060	6	23843212	23847174	+	204922206 , 204951639	glycosyltransferase 20family 20protein 2C 20putative 2C 20expressed	nongenic	WS20	_		_			Biochemical character	Os06g0602800		GO:0008375 - acetylglucosaminyltransferase activity, GO:0016020 - membrane, GO:0008152 - metabolic process
NPT	LOC_Os06g40090	6	23863461	23864522	-	204951592 , 204951639	VQ 20domain 20containing 20protein 2C 20putative 2C 20expressed	nongenic	WS20	VQ23	OsVQ23	VQ MOTIF-CONTAINING PROTEIN 23	VQ motif-containing protein 23, valine-glutamine protein 23	VQ MOTIF-CONTAINING PROTEIN 23		Os06g0603300
NPT	LOC_Os06g40110	6	23873478	23874725	-	204951592 , 204951639	RNA 20polymerase 20Rpc34 20subunit 20family 20protein 2C 20expressed	nongenic	WS20
NPT	LOC_Os06g44770	6	27046712	27047926	-	208133709	expressed 20protein	nongenic	WS20
NPT	LOC_Os06g44780	6	27054106	27054779	+	208133709	expressed 20protein	nongenic	WS20
NPT	LOC_Os06g50146	6	30367350	30370711	+	211453313,211487873	calcium-dependent 20protein 20kinase 20CPK1 20adapter 20protein 202 2C 20putative 2C 20expressed	genic	ISARC
NPT	LOC_Os06g50210	6	30401326	30403074	-	211453313,211487873	expressed 20protein	nongenic	ISARC
NPT	LOC_Os06g50220	6	30408646	30414576	+	211453313,211487873	expressed 20protein	nongenic	ISARC	DUF668-10	OsDUF668-10	DUF668 FAMILY MEMBER 10	DUF668 family member 10	DUF668 FAMILY MEMBER 10	Tolerance and resistance - Stress tolerance	Os06g0716000		GO:0009651 - response to salt stress, GO:0009414 - response to water deprivation, GO:0009739 - response to gibberellin stimulus, GO:0009735 - response to cytokinin stimulus, GO:0009408 - response to heat, GO:0009409 - response to cold, GO:0009733 - response to auxin stimulus, GO:0009751 - response to salicylic acid stimulus	TO:0000276 - drought tolerance, TO:0000166 - gibberellic acid sensitivity, TO:0000259 - heat tolerance, TO:0000303 - cold tolerance, TO:0000167 - cytokinin sensitivity, TO:0000163 - auxin sensitivity, TO:0006001 - salt tolerance	PO:0000003 - whole plant
NPT	LOC_Os08g16050	8	9784065	9786925	-	251817018 , 251819427	tetraspanin 20family 20protein 2C 20putative 2C 20expressed	nongenic	WS21	TET11	OsTET11	TETRASPANIN 11	tetraspanin 11	TETRASPANIN 11	Vegetative organ - Leaf, Tolerance and resistance - Stress tolerance	Os08g0260600		GO:0009737 - response to abscisic acid stimulus, GO:0009741 - response to brassinosteroid stimulus, GO:0009753 - response to jasmonic acid stimulus, GO:0010150 - leaf senescence, GO:0016021 - integral to membrane, GO:0009414 - response to water deprivation	TO:0000172 - jasmonic acid sensitivity, TO:0000615 - abscisic acid sensitivity, TO:0000276 - drought tolerance, TO:0000249 - leaf senescence, TO:0002677 - brassinosteroid sensitivity	PO:0001054 - 4 leaf senescence stage , PO:0025034 - leaf
NPT	LOC_Os08g16060	8	9792590	9794516	-	251817018 , 251819427	hypothetical 20protein	nongenic	WS21
NPT	LOC_Os09g15010	9	9035177	9041126	-	279524264 , 279508860	retrotransposon 20protein 2C 20putative 2C 20unclassified 2C 20expressed	nongenic	WS21
NPT	LOC_Os09g15020	9	9053616	9058328	+	279524264 , 279508860	retrotransposon 20protein 2C 20putative 2C 20unclassified 2C 20expressed	nongenic	WS21
NPT	LOC_Os09g16500	9	10104566	10104886	-	280601256 , 280633795	expressed 20protein	nongenic	WS21
NPT	LOC_Os09g16510	9	10128825	10131136	+	280601256 , 280633795	WRKY74 2C 20expressed	nongenic	WS21	WRKY74	OsWRKY74	WRKY GENE 74	Rice WRKY gene74	TRANSCRIPTION FACTOR WRKY74	Character as QTL - Germination, Character as QTL - Yield and productivity, Vegetative organ - Culm, Tolerance and resistance - Stress tolerance, Tolerance and resistance - Disease resistance	Os09g0334500		GO:0010106 - cellular response to iron ion starvation, GO:0016036 - cellular response to phosphate starvation, GO:0003700 - transcription factor activity, GO:0042742 - defense response to bacterium, GO:0005634 - nucleus, GO:0006995 - cellular response to nitrogen starvation, GO:0009629 - response to gravity, GO:0006952 - defense response, GO:0009408 - response to heat, GO:0009409 - response to co…	TO:0000259 - heat tolerance, TO:0000011 - nitrogen sensitivity, TO:0000224 - iron sensitivity, TO:0002693 - gravity response trait, TO:0000396 - grain yield, TO:0000303 - cold tolerance, TO:0000346 - tiller number, TO:0000524 - submergence tolerance, TO:0000043 - root anatomy and morphology trait, TO:0000175 - bacterial blight disease resistance	PO:0007057 - 0 seed germination stage , PO:0009005 - root , PO:0007045 - coleoptile emergence stage , PO:0025034 - leaf
NPT	LOC_Os09g16550	9	10158495	10160954	-	280601256 , 280633795	ankyrin 20repeat 20family 20protein 2C 20putative 2C 20expressed	nongenic	WS21
NPT	LOC_Os09g16560	9	10161767	10163953	-	280601256 , 280633795	hypothetical 20protein	nongenic	WS21
NPT	LOC_Os09g16940	9	10357667	10360191	-	280853279 , 280836996	retrotransposon 20protein 2C 20putative 2C 20Ty1-copia 20subclass 2C 20expressed	nongenic	WS21
NPT	LOC_Os09g16950	9	10365054	10368262	+	280853279 , 280836996	cysteine-rich 20receptor-like 20protein 20kinase 2025 20precursor 2C 20putative 2C 20expressed	nongenic	WS21
NPT	LOC_Os09g16980	9	10378532	10381850	-	280853279 , 280836996	OsWAK86 20- 20OsWAK 20pseudogene 2C 20expressed	genic	WS21	WAK86	OsWAK86	WALL-ASSOCIATED KINASE GENE 86		WALL-ASSOCIATED KINASE 86	Biochemical character	Os09g0339300		GO:0016021 - integral to membrane, GO:0005886 - plasma membrane, GO:0004674 - protein serine/threonine kinase activity, GO:0007166 - cell surface receptor linked signal transduction, GO:0005524 - ATP binding, GO:0030247 - polysaccharide binding, GO:0005509 - calcium ion binding, GO:0006468 - protein amino acid phosphorylation
NPT	LOC_Os10g07510	10	3991788	3993648	-	297532213,297487901	DUF260 20domain 20containing 20protein 2C 20putative 2C 20expressed	nongenic	ISARC	CRLL2	OsCrll2, Crll2, CRL1L2	CRL1-LIKE 2	Crl1-like 2	CRL1-LIKE 2		Os10g0162600		GO:0005634 - nucleus, GO:0045893 - positive regulation of transcription, DNA-dependent, GO:0009755 - hormone-mediated signaling
NPT	LOC_Os10g07520	10	4004508	4005146	-	297532213,297487901	hypothetical 20protein	nongenic	ISARC
NPT	LOC_Os10g07544	10	4045599	4045958	+	297532213,297482770	expressed 20protein	nongenic	ISARC
NPT	LOC_Os10g36966	10	19806571	19808117	-	313292189 , 313271326	hypothetical 20protein	genic	WS21
NPT	LOC_Os11g37260	11	22003368	22010520	+	338700013,338720149	SEY1 2C 20putative 2C 20expressed	genic	IGKV	RHD3	OsRHD3	_			Tolerance and resistance - Stress tolerance	Os11g0582300		GO:0005783 - endoplasmic reticulum, GO:0009415 - response to water, GO:0005737 - cytoplasm, GO:0016021 - integral to membrane, GO:0016320 - endoplasmic reticulum membrane fusion, GO:0007029 - endoplasmic reticulum organization, GO:0003924 - GTPase activity, GO:0005525 - GTP binding, GO:0005789 - endoplasmic reticulum membrane	TO:0000237 - water stress trait
NPT	LOC_Os11g37300	11	22025760	22029748	+	338700013,338720149	OsFBDUF53 20- 20F-box 20and 20DUF 20domain 20containing 20protein 2C 20expressed	genic	IGKV	_	OsFbox614, Os_F0381, OsFBDUF53, FBDUF53	_	F-box protein 614, F-box-type E3 ubiquitin ligase FBDUF53			Os11g0582700
NPT, PL	LOC_Os11g38720	11	22979471	22983566	+	339691068,339689202, 339691389 , 339728839	retrotransposon 20protein 2C 20putative 2C 20Ty3-gypsy 20subclass	nongenic	ISARC, WS20
NPT, PL	LOC_Os11g38750	11	23011030	23015598	-	339691068,339689202, 339728839	retrotransposon 20protein 2C 20putative 2C 20unclassified 2C 20expressed	nongenic, QTN, nongenic	ISARC, IGKV_WS2020, WS20
NPT	LOC_Os11g39030	11	23236036	23237283	-	339936732,339932916	RNA 20recognition 20motif 20containing 20protein 2C 20putative 2C 20expressed	nongenic	ISAH
NPT, PH	LOC_Os11g39040	11	23246056	23248943	-	339936732,339932916, 339864519	expressed 20protein	nongenic, QTN	ISAH, ISAH_WS2021, IGKV_WS2021
NPT	LOC_Os11g41480	11	24879854	24885744	+	341622612	retrotransposon 20protein 2C 20putative 2C 20Ty3-gypsy 20subclass 2C 20expressed	QTN	ISARC_WS2021
NPT	LOC_Os11g41490	11	24886561	24889676	-	341622612	retrotransposon 20protein 2C 20putative 2C 20Ty3-gypsy 20subclass 2C 20expressed	QTN	ISARC_WS2021
NPT	LOC_Os11g41500	11	24892803	24893498	-	341622612	NC 20domain-containing 20protein 2C 20putative 2C 20expressed	QTN	ISARC_WS2021
NPT	LOC_Os11g41510	11	24898601	24899426	-	341622612	expressed 20protein	QTN	ISARC_WS2021
NPT	LOC_Os11g41520	11	24899967	24903022	+	341622612,341598599	hypothetical 20protein	nongenic, QTN	ISARC, ISARC_WS2021
NPT	LOC_Os11g41530	11	24906902	24908061	-	341622612,341598599	expressed 20protein	nongenic, QTN	ISARC, ISARC_WS2021
NPT	LOC_Os11g41540	11	24911501	24917050	+	341622612	disease 20resistance 20RPP8-like 20protein 203 2C 20putative 2C 20expressed	QTN	ISARC_WS2021	RPP8	OsRPP8	_			Tolerance and resistance - Disease resistance	Os11g0633500		GO:0005524 - ATP binding, GO:0006952 - defense response, GO:0043531 - ADP binding
NPT	LOC_Os11g41550	11	24929007	24930802	+	341622612,341598599	expressed 20protein	genic, QTN	ISARC, ISARC_WS2021	_	OsSTA268	_			Reproductive organ - Spikelet, flower, glume, awn					PO:0009066 - anther
NPT	LOC_Os11g41560	11	24932541	24935221	+	341622612	OsFBX427 20- 20F-box 20domain 20containing 20protein 2C 20expressed	QTN	ISARC_WS2021	_	OsFbox627, Os_F0089, OsFBX427, FBX427	_	F-box protein 627, F-box-type E3 ubiquitin ligase X427			Os11g0633800
NPT	LOC_Os11g41570	11	24936787	24939914	-	341622612	OsFBX428 20- 20F-box 20domain 20containing 20protein 2C 20expressed	QTN	ISARC_WS2021	_	OsFbox628, Os_F0028	_	F-box protein 628
NPT	LOC_Os11g41600	11	24950781	24952708	-	341622612	expressed 20protein	QTN	ISARC_WS2021
NPT	LOC_Os11g41610	11	24973759	24975050	+	341622612	40S 20ribosomal 20protein 20S29 2C 20putative 2C 20expressed	QTN	ISARC_WS2021
NPT	LOC_Os11g41620	11	24976148	24978880	+	341622612	transposon 20protein 2C 20putative 2C 20unclassified 2C 20expressed	QTN	ISARC_WS2021
NPT	LOC_Os11g44500	11	26916494	26918387	+	343655202	protein 20kinase 20domain 20containing 20protein 2C 20expressed	QTN	ISARC_WS2020	RLCK346	OsRLCK346	RECEPTOR-LIKE CYTOPLASMIC KINASE 346	Receptor-like Cytoplasmic Kinase 346	RECEPTOR-LIKE CYTOPLASMIC KINASE 346		Os11g0667000
NPT	LOC_Os11g44550	11	26934169	26935437	+	343655202	protein 20kinase 20family 20protein 2C 20putative 2C 20expressed	QTN	ISARC_WS2020	RLCK347	OsRLCK347	RECEPTOR-LIKE CYTOPLASMIC KINASE 347	Receptor-like Cytoplasmic Kinase 347	RECEPTOR-LIKE CYTOPLASMIC KINASE 347		Os11g0667500/Os11g0667550
NPT	LOC_Os11g44560	11	26940019	26946887	+	343655202	protein 20kinase 20domain 20containing 20protein 2C 20expressed	QTN	ISARC_WS2020	RLCK348	OsRLCK348	RECEPTOR-LIKE CYTOPLASMIC KINASE 348	Receptor-like Cytoplasmic Kinase 348	RECEPTOR-LIKE CYTOPLASMIC KINASE 348	Reproductive organ - panicle, Tolerance and resistance - Stress tolerance, Seed	Os11g0667600/Os11g0667700		GO:0009651 - response to salt stress, GO:0048316 - seed development, GO:0010229 - inflorescence development, GO:0009414 - response to water deprivation	TO:0000653 - seed development trait, TO:0000276 - drought tolerance, TO:0000621 - inflorescence development trait, TO:0006001 - salt tolerance	PO:0001083 - inflorescence development stage , PO:0009049 - inflorescence , PO:0001170 - seed development stage , PO:0009010 - seed
NPT	LOC_Os11g44570	11	26949799	26951192	+	343655202	expressed 20protein	QTN	ISARC_WS2020
NPT	LOC_Os11g44580	11	26953151	26955595	-	343655202	go35 20NBS-LRR 2C 20putative 2C 20expressed	QTN	ISARC_WS2020	NBSGO35	OsNBSGO35, RPP13	_			Tolerance and resistance - Disease resistance	Os11g0668100		GO:0043531 - ADP binding, GO:0050832 - defense response to fungus	TO:0000074 - blast disease
NPT	LOC_Os11g44590	11	26960101	26963361	-	343655202	retrotransposon 20protein 2C 20putative 2C 20Ty3-gypsy 20subclass 2C 20expressed	QTN	ISARC_WS2020
NPT	LOC_Os11g44600	11	26967393	26977789	+	343655202	calmodulin 20binding 20protein 2C 20putative 2C 20expressed	QTN	ISARC_WS2020
NPT	LOC_Os11g44630	11	26983106	26985704	-	343655202	calmodulin 20binding 20protein 2C 20putative 2C 20expressed	QTN	ISARC_WS2020
NPT	LOC_Os11g44650	11	26999754	27001025	+	343655202	expressed 20protein	QTN	ISARC_WS2020
NPT	LOC_Os11g44660	11	27007529	27009696	+	343655202	protein 20kinase 2C 20putative 2C 20expressed	QTN	ISARC_WS2020	RLCK349	OsRLCK349	RECEPTOR-LIKE CYTOPLASMIC KINASE 349	Receptor-like Cytoplasmic Kinase 349	RECEPTOR-LIKE CYTOPLASMIC KINASE 349	Biochemical character	Os11g0668800		GO:0005524 - ATP binding, GO:0004674 - protein serine/threonine kinase activity, GO:0007166 - cell surface receptor linked signal transduction, GO:0006468 - protein amino acid phosphorylation
NPT	LOC_Os11g45924	11	27789618	27791943	-	344527911	WRKY41 2C 20expressed	QTN	ISARC_WS2021
NPT	LOC_Os11g45930	11	27793777	27797821	+	344527911	NBS-LRR 20type 20disease 20resistance 20protein 2C 20putative 2C 20expressed	QTN	ISARC_WS2021
NPT	LOC_Os11g45940	11	27799133	27800295	+	344527911	expressed 20protein	QTN	ISARC_WS2021
NPT	LOC_Os11g45950	11	27804177	27804967	-	344527911	NAC 20domain-containing 20protein 2090 2C 20putative 2C 20expressed	QTN	ISARC_WS2021	NAC130	ONAC130	NAC DOMAIN-CONTAINING PROTEIN 130	NAC domain-containing protein 130	NAC DOMAIN-CONTAINING PROTEIN 130	Other	Os11g0686700		GO:0003677 - DNA binding, GO:0006355 - regulation of transcription, DNA-dependent
NPT	LOC_Os11g45970	11	27812251	27818431	-	344527911	NBS-LRR 20disease 20resistance 20protein 2C 20putative 2C 20expressed	QTN	ISARC_WS2021
NPT	LOC_Os11g45980	11	27820309	27824920	+	344527911	NBS-LRR 20type 20disease 20resistance 20protein 2C 20putative 2C 20expressed	QTN	ISARC_WS2021
NPT	LOC_Os11g45990	11	27828621	27835246	+	344527911	von 20Willebrand 20factor 20type 20A 20domain 20containing 20protein 2C 20putative 2C 20expressed	QTN	ISARC_WS2021	VWA36	OsvWA36, vWA36	VON WILLEBRAND FACTOR A36	von Willebrand factor A36	VON WILLEBRAND FACTOR A36	Tolerance and resistance - Stress tolerance, Tolerance and resistance - Disease resistance, Tolerance and resistance - Insect resistance	Os11g0687100		GO:0002213 - defense response to insect, GO:0002242 - defense response to parasitic plant, GO:0042742 - defense response to bacterium, GO:0009651 - response to salt stress, GO:0009739 - response to gibberellin stimulus, GO:0046686 - response to cadmium ion, GO:0009725 - response to hormone stimulus, GO:0050832 - defense response to fungus, GO:0010288 - response to lead ion	TO:0000444 - parasitic weed, TO:0000401 - plant growth hormone sensitivity, TO:0000166 - gibberellic acid sensitivity, TO:0006001 - salt tolerance, TO:0000175 - bacterial blight disease resistance, TO:0000074 - blast disease, TO:0000423 - gall midge resistance	PO:0009049 - inflorescence , PO:0009006 - shoot system , PO:0025034 - leaf , PO:0020104 - leaf sheath
NPT	LOC_Os11g46000	11	27841513	27846793	+	344527911	von 20Willebrand 20factor 20type 20A 20domain 20containing 20protein 2C 20putative 2C 20expressed	QTN	ISARC_WS2021	VWA37	OsvWA37, vWA37	VON WILLEBRAND FACTOR A37	von Willebrand factor A37	VON WILLEBRAND FACTOR A37	Tolerance and resistance - Disease resistance, Tolerance and resistance - Insect resistance, Tolerance and resistance - Stress tolerance	Os11g0687200		GO:0050832 - defense response to fungus, GO:0009645 - response to low light intensity stimulus, GO:0009739 - response to gibberellin stimulus, GO:0009725 - response to hormone stimulus, GO:0002213 - defense response to insect, GO:0002242 - defense response to parasitic plant, GO:0042742 - defense response to bacterium	TO:0000444 - parasitic weed, TO:0000074 - blast disease, TO:0000460 - light intensity sensitivity, TO:0000175 - bacterial blight disease resistance, TO:0000401 - plant growth hormone sensitivity, TO:0000166 - gibberellic acid sensitivity, TO:0000423 - gall midge resistance	PO:0009006 - shoot system , PO:0009049 - inflorescence , PO:0020104 - leaf sheath , PO:0009053 - peduncle
NPT	LOC_Os11g46010	11	27850492	27853464	-	344527911	retrotransposon 20protein 2C 20putative 2C 20unclassified 2C 20expressed	QTN	ISARC_WS2021
NPT	LOC_Os11g46020	11	27856388	27858940	-	344527911	retrotransposon 20protein 2C 20putative 2C 20unclassified 2C 20expressed	QTN	ISARC_WS2021
NPT	LOC_Os12g22940	12	12971077	12972330	+	358692340,358721296	no 20apical 20meristem 20protein 2C 20putative 2C 20expressed	nongenic	IGKV	NAC137	ONAC137	NAC DOMAIN-CONTAINING PROTEIN 137	NAC domain-containing protein 137	NAC DOMAIN-CONTAINING PROTEIN 137	Other	Os12g0418300		GO:0003677 - DNA binding, GO:0006355 - regulation of transcription, DNA-dependent
NPT	LOC_Os12g22960	12	12982074	12982632	-	358692340,358721296	retrotransposon 20protein 2C 20putative 2C 20Ty3-gypsy 20subclass	nongenic	IGKV
NPT	LOC_Os12g22990	12	12996255	13002929	-	358692340,358721296	retrotransposon 20protein 2C 20putative 2C 20Ty3-gypsy 20subclass 2C 20expressed	nongenic	IGKV
NPT	LOC_Os12g23010	12	13008513	13011396	-	358692340,358721296	retrotransposon 20protein 2C 20putative 2C 20unclassified 2C 20expressed	nongenic	IGKV
NPT	LOC_Os12g29280	12	17354834	17357230	+	363108602	disease 20resistance 20protein 20RGA3 2C 20putative 2C 20expressed	QTN	IGKV_WS2020
NPT	LOC_Os12g29290	12	17362964	17365528	+	363108602	disease 20resistance 20protein 20RGA3 2C 20putative 2C 20expressed	QTN	IGKV_WS2020
NPT	LOC_Os12g29310	12	17370442	17374732	-	363108602	retrotransposon 20protein 2C 20putative 2C 20Ty1-copia 20subclass 2C 20expressed	QTN	IGKV_WS2020
NPT	LOC_Os12g29320	12	17376279	17378734	-	363108602	expressed 20protein	QTN	IGKV_WS2020
NPT	LOC_Os12g29330	12	17391342	17392732	+	363108602	no 20apical 20meristem 20protein 2C 20putative 2C 20expressed	QTN	IGKV_WS2020	NAC139	ONAC139, OsNAM	NAC DOMAIN-CONTAINING PROTEIN 139	NAC domain-containing protein 139, no apical meristem	NAC DOMAIN-CONTAINING PROTEIN 139	Tolerance and resistance - Stress tolerance, Other, Reproductive organ - Spikelet, flower, glume, awn, Character as QTL - Yield and productivity, Vegetative organ - Root	Os12g0477400		GO:0010089 - xylem development, GO:0010150 - leaf senescence, GO:0009737 - response to abscisic acid stimulus, GO:0009651 - response to salt stress, GO:0003677 - DNA binding, GO:0009414 - response to water deprivation, GO:0045892 - negative regulation of transcription, DNA-dependent	TO:0000180 - spikelet fertility, TO:0000625 - spikelet density, TO:0006001 - salt tolerance, TO:0000557 - secondary branch number, TO:0000447 - filled grain number, TO:0000276 - drought tolerance
NPT	LOC_Os12g29340	12	17406189	17413878	-	363108602	expressed 20protein	QTN	IGKV_WS2020
NPT	LOC_Os12g29350	12	17415611	17425464	-	363108602	ATP 20binding 20protein 2C 20putative 2C 20expressed	QTN	IGKV_WS2020	_		_	Stvbi paralog			Os12g0477700
NPT	LOC_Os12g29370	12	17441549	17443641	+	363108602	ZmEBE-1 20protein 2C 20putative 2C 20expressed	QTN	IGKV_WS2020
NPT	LOC_Os12g32690	12	19734698	19743121	-	365505477	retrotransposon 20protein 2C 20putative 2C 20unclassified 2C 20expressed	QTN	ISARC_WS2021
NPT	LOC_Os12g32700	12	19747824	19749276	-	365505477	expressed 20protein	QTN	ISARC_WS2021
NPT	LOC_Os12g32710	12	19754146	19757913	-	365505477	NB-ARC 20domain 20containing 20protein 2C 20expressed	QTN	ISARC_WS2021
NPT	LOC_Os12g32750	12	19779505	19786587	+	365505477	flavin 20monooxygenase 2C 20putative 2C 20expressed	QTN	ISARC_WS2021	YUCCA5	OsYUCCA5, OsYUC5, YUC5	YUCCA-LIKE GENE 5	(YUCCA-like gene)		Biochemical character	Os12g0512000		GO:0004499 - flavin-containing monooxygenase activity, GO:0009851 - auxin biosynthetic process
NPT	LOC_Os12g32760	12	19788309	19791483	-	365505477	transporter 20family 20protein 2C 20putative 2C 20expressed	QTN	ISARC_WS2021	PLT14	OsPLT14	POLYOL/MONOSACCHARIDE TRANSPORTER 14	monosaccharide transporter PLT14, PLT protein 14	POLYOL/MONOSACCHARIDE TRANSPORTER 14	Tolerance and resistance - Stress tolerance, Biochemical character	Os12g0512100		GO:0015144 - carbohydrate transmembrane transporter activity, GO:0016020 - membrane, GO:0009651 - response to salt stress, GO:0015293 - symporter activity	TO:0006001 - salt tolerance	PO:0009006 - shoot system
NPT	LOC_Os12g32770	12	19792032	19794091	+	365505477	expressed 20protein	QTN	ISARC_WS2021
NPT	LOC_Os12g32790	12	19805936	19809658	+	365505477	disease 20resistance 20RPP13-like 20protein 201 2C 20putative 2C 20expressed	QTN	ISARC_WS2021
NPT	LOC_Os12g32800	12	19813727	19824570	+	365505477	retrotransposon 20protein 2C 20putative 2C 20Ty3-gypsy 20subclass 2C 20expressed	QTN	ISARC_WS2021
NPT	LOC_Os12g32810	12	19826091	19826627	-	365505477	expressed 20protein	QTN	ISARC_WS2021
NPT	LOC_Os12g32814	12	19828481	19831364	-	365505477	pleiotropic 20drug 20resistance 20protein 203 2C 20putative 2C 20expressed	QTN	ISARC_WS2021
NPT	LOC_Os12g32820	12	19832726	19837081	-	365505477	pleiotropic 20drug 20resistance 20protein 203 2C 20putative 2C 20expressed	QTN	ISARC_WS2021	PDR23	OsABCG50, OsPDR23, OsABCG50_1, OsABCG50_2	PLEIOTROPIC DRUG RESISTANCE 23	ABC transporter superfamily ABCG subgroup member 50, pleiotropic drug resistance 23	PLEIOTROPIC DRUG RESISTANCE 23	Biochemical character	Os12g0512700		GO:0016887 - ATPase activity, GO:0005524 - ATP binding, GO:0016020 - membrane, GO:0006200 - ATP catabolic process
NPT	LOC_Os12g36940	12	22648120	22656270	+	368415904	calmodulin 20binding 20protein 2C 20putative 2C 20expressed	QTN	ISAH_WS2020
NPT	LOC_Os12g36950	12	22656374	22662600	-	368415904	CTP 20synthase 2C 20putative 2C 20expressed	QTN	ISAH_WS2020	CTPS6	OsCTPS6	CYTIDINE TRIPHOSPHATE SYNTHASE 6	cytidine triphosphate synthase 6	CYTIDINE TRIPHOSPHATE SYNTHASE 6	Biochemical character	Os12g0556600		GO:0042802 - identical protein binding, GO:0006541 - glutamine metabolic process, GO:0006241 - CTP biosynthetic process, GO:0019856 - pyrimidine base biosynthetic process, GO:0003883 - CTP synthase activity, GO:0005524 - ATP binding
NPT	LOC_Os12g36970	12	22667587	22668048	-	368415904	expressed 20protein	QTN	ISAH_WS2020
NPT	LOC_Os12g37030	12	22695489	22701285	-	368415904	transposon 20protein 2C 20putative 2C 20CACTA 2C 20En 2FSpm 20sub-class 2C 20expressed	QTN	ISAH_WS2020
NPT	LOC_Os12g37040	12	22701491	22702975	-	368415904	retrotransposon 20protein 2C 20putative 2C 20unclassified	QTN	ISAH_WS2020
NPT	LOC_Os12g37050	12	22705056	22707035	-	368415904	retrotransposon 20protein 2C 20putative 2C 20unclassified 2C 20expressed	QTN	ISAH_WS2020
NPT	LOC_Os12g37060	12	22710810	22713349	-	368415904	expressed 20protein	QTN	ISAH_WS2020
NPT	LOC_Os12g37070	12	22716270	22718698	-	368415904	expressed 20protein	QTN	ISAH_WS2020
NPT	LOC_Os12g37080	12	22719442	22719696	-	368415904	expressed 20protein	QTN	ISAH_WS2020
NPT	LOC_Os12g37090	12	22721867	22722193	-	368415904	expressed 20protein	QTN	ISAH_WS2020
NPT	LOC_Os12g37100	12	22723143	22726843	-	368415904	pentatricopeptide 20repeat 20domain 20containing 20protein 2C 20putative 2C 20expressed	QTN	ISAH_WS2020
NPT	LOC_Os12g37110	12	22730840	22733722	+	368415904	OsFBD16 20- 20F-box 20and 20FBD 20domain 20containing 20protein 2C 20expressed	QTN	ISAH_WS2020	_	OsFbox667, Os_F0594, OsFBD16, FBD16	_	F-box protein 667, F-box-type E3 ubiquitin ligase D16			Os12g0557900
NPT	LOC_Os12g37130	12	22750411	22751798	+	368415904	OsFBD17 20- 20F-box 20and 20FBD 20domain 20containing 20protein	QTN	ISAH_WS2020	_	OsFbox668, Os_F0389	_	F-box protein 668
NPT	LOC_Os12g39030	12	24007355	24010009	+	369735392,369726858	BED 20zinc 20finger 20family 20protein 2C 20expressed	nongenic	IGKV
NPT	LOC_Os12g39040	12	24013384	24013872	+	369735392,369726858	retrotransposon 20protein 2C 20putative 2C 20Ty1-copia 20subclass	nongenic	IGKV
NPT	LOC_Os12g39060	12	24029161	24029517	+	369735392,369726858	expressed 20protein	nongenic	IGKV
NPT	LOC_Os12g39240	12	24154936	24156950	-	369915222	cytochrome 20P450 2C 20putative 2C 20expressed	QTN	ISARC_WS2020
NPT	LOC_Os12g39250	12	24160481	24161357	+	369915222	expressed 20protein	QTN	ISARC_WS2020
NPT	LOC_Os12g39260	12	24163373	24168386	+	369915222	retrotransposon 20protein 2C 20putative 2C 20unclassified 2C 20expressed	QTN	ISARC_WS2020
NPT	LOC_Os12g39300	12	24154798	24157079	-	369915222	cytochrome 20P450 2C 20putative 2C 20expressed	QTN	ISARC_WS2020	CYP71U2	OsCYP71U2	CYTOCHROME P450 71U2	Cytochrome P450 71U2	CYTOCHROME P450 71U2	Biochemical character	Os12g0582000		GO:0004497 - monooxygenase activity, GO:0016020 - membrane, GO:0016705 - oxidoreductase activity, acting on paired donors, with incorporation or reduction of molecular oxygen, GO:0020037 - heme binding, GO:0005506 - iron ion binding
NPT	LOC_Os12g39310	12	24184198	24186545	-	369915222	cytochrome 20P450 2C 20putative 2C 20expressed	QTN	ISARC_WS2020
NPT	LOC_Os12g39320	12	24191441	24197634	+	369915222	DUF221 20domain 20containing 20protein 2C 20expressed	QTN	ISARC_WS2020	OSCA2.4	OsOSCA2.4, OsIOSCA2.4, OsDDP9, DDP9, OsDDP9.1	HYPEROSMOLALITY-GATED CALCIUM-PERMEABLE CHANNEL 2.4	Hyperosmolality-gated calcium-permeable channel 2.4, DUF221 Domain containing Protein 9, reduced hyperosmolality-induced Ca2+ increase 2.4	HYPEROSMOLALITY-GATED CALCIUM-PERMEABLE CHANNEL 2.4	Biochemical character, Seed	Os12g0582800		GO:0005783 - endoplasmic reticulum, GO:0009651 - response to salt stress, GO:0016020 - membrane, GO:0048316 - seed development, GO:0005886 - plasma membrane, GO:0009737 - response to abscisic acid stimulus, GO:0006970 - response to osmotic stress, GO:0009414 - response to water deprivation	TO:0000276 - drought tolerance, TO:0006001 - salt tolerance, TO:0000095 - osmotic response sensitivity, TO:0000653 - seed development trait, TO:0000615 - abscisic acid sensitivity	PO:0007022 - seed imbibition stage , PO:0001170 - seed development stage
NPT	LOC_Os12g39340	12	24204768	24208276	-	369915222	glycosyl 20transferase 2C 20group 201 20domain 20containing 20protein 2C 20expressed	QTN	ISARC_WS2020
NPT	LOC_Os12g39360	12	24212538	24215241	+	369915222	aspartic 20proteinase 20nepenthesin 20precursor 2C 20putative 2C 20expressed	QTN	ISARC_WS2020
NPT	LOC_Os12g39380	12	24218359	24224963	-	369915222	BTBN24 20- 20Bric-a-Brac 2C 20Tramtrack 2C 20Broad 20Complex 20BTB 20domain 20with 20non-phototropic 20hypocotyl 203 20NPH3 20domain 2C 20expressed	QTN	ISARC_WS2020	BTBN24	OsBTBN24	BTB-TYPE E3 UBIQUITIN LIGASE N24	BTB-type E3 ubiquitin ligase N24			Os12g0583500
NPT	LOC_Os12g39410	12	24242668	24244881	-	369915222	expressed 20protein	QTN	ISARC_WS2020
NPT	LOC_Os12g39420	12	24246024	24252367	+	369915222	nucleobase-ascorbate 20transporter 2C 20putative 2C 20expressed	QTN	ISARC_WS2020
PH	LOC_Os01g03500	1	1410987	1413093	-	1413631,1414781	expressed 20protein	nongenic	ISARC
PH	LOC_Os01g03510	1	1413839	1419043	+	1413631,1414781	WD 20domain 2C 20G-beta 20repeat 20domain 20containing 20protein 2C 20expressed	genic	ISARC	_	OsWD40-1, WD40-1, OsWD40, WD40, OsDWD68, DWD68	_	WD-40 repeat domain-containing protein, DWD motif- containing protein 68			Os01g0125800		GO:0030864 - cortical actin cytoskeleton, GO:0030042 - actin filament depolymerization, GO:0051015 - actin filament binding, GO:0030836 - positive regulation of actin filament depolymerization, GO:0042643 - actomyosin, actin part, GO:0005634 - nucleus
PH	LOC_Os01g09490	1	4840354	4845339	+	4848393	transposon 20protein 2C 20putative 2C 20unclassified 2C 20expressed	nongenic	IGKV
PH	LOC_Os01g09500	1	4849901	4852193	-	4848393	expressed 20protein	nongenic	IGKV
PH	LOC_Os01g33260	1	18319956	18336890	-	18325263	retrotransposon 20protein 2C 20putative 2C 20unclassified 2C 20expressed	genic	WS21
PH	LOC_Os01g37550	1	20971387	20974629	-	20996888,20987337	transposon 20protein 2C 20putative 2C 20unclassified 2C 20expressed	nongenic	ISARC
PH	LOC_Os01g37560	1	20987760	20992534	+	20996888,20987337	chaperone 20protein 20dnaJ 2049 2C 20putative 2C 20expressed	nongenic	ISARC	_	OsDjC9	_	DnaJ domain protein C9		Tolerance and resistance - Stress tolerance	Os01g0556400		GO:0006950 - response to stress	TO:0000164 - stress trait
PH	LOC_Os01g37570	1	21003608	21005963	-	20996888,20987337	retrotransposon 20protein 2C 20putative 2C 20Ty3-gypsy 20subclass	nongenic	ISARC
PH	LOC_Os01g45060	1	25579802	25583765	+	25678386	polygalacturonase 2C 20putative 2C 20expressed	QTN	IGKV_WS2020	PG3	OsPG3	POLYGALACTURONASE 3	polygalacturonase 3	POLYGALACTURONASE 3	Character as QTL - Plant growth activity, Biochemical character, Vegetative organ - Culm	Os01g0637500		GO:0009699 - phenylpropanoid biosynthetic process, GO:0004650 - polygalacturonase activity, GO:0009664 - plant-type cell wall organization, GO:0032350 - regulation of hormone metabolic process, GO:0005975 - carbohydrate metabolic process	TO:0000207 - plant height, TO:0000357 - growth and development trait	PO:0009047 - stem
PH	LOC_Os01g45090	1	25592725	25593920	+	25678386	MYB 20family 20transcription 20factor 2C 20putative 2C 20expressed	QTN	IGKV_WS2020	_	OsMYB8, MYB8, OsMYB305, MYB305, Os2R_MYB9, 2R_MYB9	_	myb transcription factor 8, transcription factor MYB8, R2R3-MYB Transcription Factor 9		Coloration, Tolerance and resistance - Stress tolerance, Other, Vegetative organ - Leaf	Os01g0637800		GO:0005634 - nucleus, GO:0010150 - leaf senescence, GO:0009964 - negative regulation of flavonoid biosynthetic process, GO:0030244 - cellulose biosynthetic process, GO:0010167 - response to nitrate, GO:0060359 - response to ammonium ion, GO:0042594 - response to starvation, GO:0042128 - nitrate assimilation, GO:0003677 - DNA binding, GO:0003682 - chromatin binding	TO:0000552 - shoot dry weight, TO:0000011 - nitrogen sensitivity, TO:0000249 - leaf senescence, TO:0000346 - tiller number	PO:0009005 - root , PO:0020141 - stem node , PO:0020142 - stem internode , PO:0020104 - leaf sheath , PO:0025034 - leaf
PH	LOC_Os01g45100	1	25597204	25597770	-	25678386	retrotransposon 20protein 2C 20putative 2C 20unclassified 2C 20expressed	QTN	IGKV_WS2020
PH	LOC_Os01g45110	1	25598446	25600373	+	25678386	anthocyanin 203-O-beta-glucosyltransferase 2C 20putative 2C 20expressed	QTN	IGKV_WS2020	UGT703A2	OsUGT703A2	UDP-GLUCOSE-DEPENDENT GLYCOSYLTRANSFERASE 703A2	UDP-glucose-dependent glycosyltransferase 703A2, anthocyanin 3'-O-beta-glucosyltransferase	UDP-GLUCOSE-DEPENDENT GLYCOSYLTRANSFERASE 703A2	Biochemical character, Tolerance and resistance - Stress tolerance, Coloration - Anthocyanin	Os01g0638000		GO:0043231 - intracellular membrane-bounded organelle, GO:0080043 - quercetin 3-O-glucosyltransferase activity, GO:0080044 - quercetin 7-O-glucosyltransferase activity, GO:0046686 - response to cadmium ion, GO:0010038 - response to metal ion, GO:0046689 - response to mercury ion, GO:0016758 - transferase activity, transferring hexosyl groups, GO:0009813 - flavonoid biosynthetic process, GO:000815…	TO:0002649 - pesticide sensitivity, TO:0000034 - chromium sensitivity
PH	LOC_Os01g45120	1	25603617	25604054	-	25678386	expressed 20protein	QTN	IGKV_WS2020
PH	LOC_Os01g45140	1	25615863	25617353	+	25678386	anthocyanin 203-O-beta-glucosyltransferase 2C 20putative 2C 20expressed	QTN	IGKV_WS2020	UGT703A1	OsUGT703A1	UDP-GLUCOSE-DEPENDENT GLYCOSYLTRANSFERASE 703A1	UDP-glucose-dependent glycosyltransferase 703A1	UDP-GLUCOSE-DEPENDENT GLYCOSYLTRANSFERASE 703A1	Biochemical character	Os01g0638600		GO:0008152 - metabolic process, GO:0080043 - quercetin 3-O-glucosyltransferase activity, GO:0080044 - quercetin 7-O-glucosyltransferase activity, GO:0043231 - intracellular membrane-bounded organelle
PH	LOC_Os01g45160	1	25627258	25627872	+	25678386	expressed 20protein	QTN	IGKV_WS2020
PH	LOC_Os01g45174	1	25630010	25636071	-	25678386	transposon 20protein 2C 20putative 2C 20unclassified 2C 20expressed	QTN	IGKV_WS2020
PH	LOC_Os01g45190	1	25636950	25640563	+	25678386	DEAD-box 20ATP-dependent 20RNA 20helicase 2C 20putative 2C 20expressed	QTN	IGKV_WS2020	_	OsRH2, RH2, eIF4A-3	_	initiation factor eIF-4A, RNA helices 2, Eukaryotic initiation factor 4A-3		Reproductive organ - Spikelet, flower, glume, awn, Vegetative organ - Culm, Seed, Reproductive organ - Pollination, fertilization, fertility, Reproductive organ - Heading date	Os01g0639100		GO:0006397 - mRNA processing, GO:0048573 - photoperiodism, flowering, GO:0016020 - membrane, GO:0016607 - nuclear speck, GO:0035145 - exon-exon junction complex, GO:0003723 - RNA binding, GO:0005524 - ATP binding, GO:0005730 - nucleolus, GO:0001666 - response to hypoxia, GO:0006364 - rRNA processing, GO:0008026 - ATP-dependent helicase activity, GO:0005634 - nucleus, GO:0005737 - cytoplasm, GO:00…	TO:0000653 - seed development trait, TO:0000180 - spikelet fertility, TO:0000620 - embryo development trait, TO:0000137 - days to heading, TO:0000166 - gibberellic acid sensitivity, TO:0000145 - internode length, TO:0000207 - plant height	PO:0001007 - pollen development stage , PO:0001004 - anther development stage , PO:0020103 - flag leaf , PO:0025034 - leaf , PO:0001170 - seed development stage , PO:0007631 - plant embryo stage
PH	LOC_Os01g45200	1	25640719	25647224	-	25678386	cinnamoyl-CoA 20reductase-related 2C 20putative 2C 20expressed	QTN	IGKV_WS2020	SNL6	Snl6, OsSNL6, OsCCR2, CCR2	SUPPRESSOR OF NH1-MEDIATED LESION FORMATION 6	suppressor of BTH-induced, NH1-mediated lesion mimic 6, suppressor of NH1-mediated lesion formation 6, Cinnamoyl-CoA reductase 2		Biochemical character, Tolerance and resistance - Stress tolerance, Tolerance and resistance - Disease resistance	Os01g0639200		GO:0050832 - defense response to fungus, GO:0042742 - defense response to bacterium, GO:0009409 - response to cold, GO:0009414 - response to water deprivation, GO:0006694 - steroid biosynthetic process, GO:0003854 - 3-beta-hydroxy-delta5-steroid dehydrogenase activity	TO:0000175 - bacterial blight disease resistance, TO:0000074 - blast disease, TO:0000276 - drought tolerance, TO:0000303 - cold tolerance
PH	LOC_Os01g45360	1	25748192	25750466	-	25678386	membrane 20associated 20DUF588 20domain 20containing 20protein 2C 20putative 2C 20expressed	QTN	IGKV_WS2020
PH	LOC_Os01g45370	1	25752222	25755783	-	25678386	radical 20SAM 20enzyme 2C 20putative 2C 20expressed	QTN	IGKV_WS2020
PH	LOC_Os01g45380	1	25757795	25762187	+	25678386	protein 20kinase 20domain 20containing 20protein 2C 20expressed	QTN	IGKV_WS2020
PH	LOC_Os01g45390	1	25762489	25766525	+	25678386	HD 20domain 20containing 20protein 202 2C 20putative 2C 20expressed	QTN	IGKV_WS2020
PH	LOC_Os01g45410	1	25768623	25769096	+	25678386	expressed 20protein	QTN	IGKV_WS2020
PH	LOC_Os01g45430	1	25773953	25776179	+	25678386	expressed 20protein	QTN	IGKV_WS2020
PH	LOC_Os01g45439	1	25777453	25782419	-	25678386	expressed 20protein	QTN	IGKV_WS2020
PH	LOC_Os01g52290	1	30058008	30060963	+	30153574	expressed 20protein	QTN	IGKV_WS2021	_	OsHSP70, hsp70	_	heat shock protein 70, heat-shock protein 70, HEAT SHOCK PROTEIN 70KD			Os01g0721000		GO:0005524 - ATP binding
PH	LOC_Os01g52304	1	30062716	30066346	+	30153574	NB-ARC 20domain 20containing 20protein 2C 20expressed	QTN	IGKV_WS2021
PH	LOC_Os01g52330	1	30075624	30077126	+	30153574	NB-ARC 20domain 20containing 20protein 2C 20expressed	QTN	IGKV_WS2021
PH	LOC_Os01g52340	1	30079649	30081500	+	30153574	NB-ARC 20domain 20containing 20protein 2C 20expressed	QTN	IGKV_WS2021
PH	LOC_Os01g52370	1	30086337	30088938	-	30153574	expressed 20protein	QTN	IGKV_WS2021
PH	LOC_Os01g52380	1	30091365	30093186	+	30153574	expressed 20protein	QTN	IGKV_WS2021
PH	LOC_Os01g52400	1	30102785	30107361	+	30153574	bacterial 20transferase 20hexapeptide 20domain 20containing 20protein 2C 20expressed	QTN	IGKV_WS2021
PH	LOC_Os01g52410	1	30117114	30118654	+	30153574	myb-like 20DNA-binding 20domain 20containing 20protein 2C 20putative 2C 20expressed	QTN	IGKV_WS2021	2R_MYB14	Os2R_MYB14	R2R3-MYB TRANSCRIPTION FACTOR 14	R2R3-MYB Transcription Factor 14	R2R3-MYB TRANSCRIPTION FACTOR 14		Os01g0722300		GO:0003677 - DNA binding
PH	LOC_Os01g52450	1	30131348	30135287	+	30153574	hexokinase 2C 20putative 2C 20expressed	QTN	IGKV_WS2021	HXK9	OsHXK9	HEXOKINASE-9	Hexokinase 9	HEXOKINASE-9	Biochemical character	Os01g0722700		GO:0004396 - hexokinase activity, GO:0016021 - integral to membrane, GO:0005524 - ATP binding, GO:0009527 - plastid outer membrane, GO:0009507 - chloroplast, GO:0006096 - glycolysis
PH	LOC_Os01g52460	1	30135763	30137746	+	30153574	regulator 20of 20ribonuclease 2C 20putative 2C 20expressed	QTN	IGKV_WS2021
PH	LOC_Os01g52470	1	30143575	30146827	-	30153574	elongation 20factor 2C 20putative 2C 20expressed	QTN	IGKV_WS2021
PH	LOC_Os01g52480	1	30155665	30157765	+	30153574	senescence-associated 20protein 2C 20putative 2C 20expressed	QTN	IGKV_WS2021
PH	LOC_Os01g52490	1	30157882	30159775	-	30153574	40S 20ribosomal 20protein 20S24 2C 20putative 2C 20expressed	QTN	IGKV_WS2021	RPS24	OsRPS24	RIBOSOMAL PROTEIN S24	Ribosomal protein S24, ribosomal protein small subunit 24	RIBOSOMAL PROTEIN S24	Tolerance and resistance - Stress tolerance, Other	Os01g0723200		GO:0009414 - response to water deprivation, GO:0009651 - response to salt stress, GO:0005618 - cell wall, GO:0042542 - response to hydrogen peroxide, GO:0022627 - cytosolic small ribosomal subunit, GO:0005774 - vacuolar membrane, GO:0003735 - structural constituent of ribosome, GO:0000166 - nucleotide binding, GO:0005730 - nucleolus, GO:0009737 - response to abscisic acid stimulus, GO:0005886 - p…	TO:0002657 - oxidative stress, TO:0000276 - drought tolerance, TO:0006001 - salt tolerance, TO:0000615 - abscisic acid sensitivity
PH	LOC_Os01g52500	1	30166017	30171659	+	30153574	NADP-dependent 20malic 20enzyme 2C 20putative 2C 20expressed	QTN	IGKV_WS2021	NADP-ME2	OscytME1, OsNADP-ME2-3, NADP-ME2-3	NADP-MALIC ENZYME 2	cytosolic NADP malic enzyme 1	NADP-MALIC ENZYME 2	Biochemical character, Tolerance and resistance - Disease resistance, Tolerance and resistance - Stress tolerance	Os01g0723400		GO:0009507 - chloroplast, GO:0046872 - metal ion binding, GO:0004473 - malate dehydrogenase (oxaloacetate-decarboxylating) (NADP+) activity, GO:0050832 - defense response to fungus, GO:0051287 - NAD or NADH binding, GO:0006108 - malate metabolic process, GO:0055114 - oxidation reduction	TO:0000074 - blast disease
PH	LOC_Os01g52514	1	30173442	30179151	+	30153574	B3 20DNA 20binding 20domain 20containing 20protein 2C 20expressed	QTN	IGKV_WS2021
PH	LOC_Os01g52530	1	30180581	30184477	+	30153574	phosphoribosyl 20transferase 2C 20putative 2C 20expressed	QTN	IGKV_WS2021
PH	LOC_Os01g52540	1	30185134	30189912	+	30153574	B3 20DNA 20binding 20domain 20containing 20protein 2C 20expressed	QTN	IGKV_WS2021
PH	LOC_Os01g52550	1	30189259	30195459	-	30153574	ABC 20transporter 2C 20ATP-binding 20protein 2C 20putative 2C 20expressed	QTN	IGKV_WS2021	MDR17	OsABCB7, ABCB7, OsPGP7, OsMDR17	MULTIDRUG RESISTANCE 17	ABC transporter superfamily ABCB subgroup member 7, P-Glycoprotein 7, multidrug resistance 17	MULTIDRUG RESISTANCE 17	Tolerance and resistance - Stress tolerance, Biochemical character	Os01g0723800		GO:0010329 - auxin efflux transmembrane transporter activity, GO:0016021 - integral to membrane, GO:0009733 - response to auxin stimulus, GO:0009737 - response to abscisic acid stimulus, GO:0009651 - response to salt stress, GO:0010541 - acropetal auxin transport, GO:0005886 - plasma membrane, GO:0010540 - basipetal auxin transport, GO:0042626 - ATPase activity, coupled to transmembrane movement …	TO:0000615 - abscisic acid sensitivity, TO:0000163 - auxin sensitivity, TO:0000276 - drought tolerance, TO:0006001 - salt tolerance
PH	LOC_Os01g52560	1	30216047	30222975	+	30153574	Plant 20PDR 20ABC 20transporter 20associated 20domain 20containing 20protein 2C 20expressed	QTN	IGKV_WS2021	PDR15	OsABCG38, OsPDR15	PLEIOTROPIC DRUG RESISTANCE 15	ABC transporter superfamily ABCG subgroup member 38, pleiotropic drug resistance 15	PLEIOTROPIC DRUG RESISTANCE 15	Biochemical character	Os01g0724500		GO:0005524 - ATP binding, GO:0006200 - ATP catabolic process, GO:0006810 - transport, GO:0016021 - integral to membrane, GO:0016887 - ATPase activity
PH	LOC_Os01g52590	1	30229978	30230418	-	30153574	hypothetical 20protein	QTN	IGKV_WS2021
PH	LOC_Os01g52594	1	30236130	30236776	+	30153574	expressed 20protein	QTN	IGKV_WS2021
PH	LOC_Os01g52610	1	30241948	30251105	+	30153574	membrane 20associated 20DUF588 20domain 20containing 20protein 2C 20putative 2C 20expressed	QTN	IGKV_WS2021
PH	LOC_Os01g52630	1	30251470	30254956	+	30153574	regulator 20of 20chromosome 20condensation 2C 20putative 2C 20expressed	QTN	IGKV_WS2021
PH	LOC_Os01g66170	1	38436842	38440460	-	38538838	SNARE 20associated 20Golgi 20protein 2C 20putative 2C 20expressed	QTN	ISAH_WS2021
PH	LOC_Os01g66180	1	38443627	38446431	+	38538838	cytochrome 20c 2C 20putative 2C 20expressed	QTN	ISAH_WS2021	_		_	cytochrome c		Biochemical character, Character as QTL - Yield and productivity, Vegetative organ - Culm	Os01g0885000		GO:0005758 - mitochondrial intermembrane space, GO:0046872 - metal ion binding, GO:0006123 - mitochondrial electron transport, cytochrome c to oxygen, GO:0009055 - electron carrier activity, GO:0020037 - heme binding, GO:0006122 - mitochondrial electron transport, ubiquinol to cytochrome c	TO:0000346 - tiller number, TO:0000207 - plant height
PH	LOC_Os01g66190	1	38447688	38450501	-	38538838	expressed 20protein	QTN	ISAH_WS2021
PH	LOC_Os01g66200	1	38454786	38460564	-	38538838	expressed 20protein	QTN	ISAH_WS2021
PH	LOC_Os01g66210	1	38464169	38465598	-	38538838	retrotransposon 20protein 2C 20putative 2C 20Ty3-gypsy 20subclass	QTN	ISAH_WS2021
PH	LOC_Os01g66230	1	38469633	38475218	-	38538838	csAtPR5 2C 20putative 2C 20expressed	QTN	ISAH_WS2021
PH	LOC_Os01g66240	1	38475617	38480790	+	38538838	mitochondrion 20protein 2C 20putative 2C 20expressed	QTN	ISAH_WS2021
PH	LOC_Os01g66250	1	38481235	38484007	+	38538838	S-locus-like 20receptor 20protein 20kinase 2C 20putative 2C 20expressed	QTN	ISAH_WS2021	SDRLK17	SDRLK-17, OsSDRLK-17, OsSDRLK17	S-DOMAIN RECEPTOR LIKE KINASE 17	S-Domain receptor like kinase-17	S-DOMAIN RECEPTOR LIKE KINASE 17	Biochemical character, Tolerance and resistance - Stress tolerance	Os01g0885700		GO:0005524 - ATP binding, GO:0005886 - plasma membrane, GO:0009414 - response to water deprivation, GO:0009409 - response to cold, GO:0048544 - recognition of pollen, GO:0006468 - protein amino acid phosphorylation, GO:0016021 - integral to membrane, GO:0004674 - protein serine/threonine kinase activity	TO:0000303 - cold tolerance, TO:0000276 - drought tolerance	PO:0009046 - flower , PO:0025034 - leaf
PH	LOC_Os01g66260	1	38484468	38485604	-	38538838	expressed 20protein	QTN	ISAH_WS2021
PH	LOC_Os01g66280	1	38491271	38494134	-	38538838	transcriptional 20regulator 2C 20putative 2C 20expressed	QTN	ISAH_WS2021	_		_			Reproductive organ - Pollination, fertilization, fertility - Sterility, Reproductive organ - Heading date, Character as QTL - Yield and productivity	Os01g0886000		GO:0048573 - photoperiodism, flowering	TO:0000137 - days to heading, TO:0000346 - tiller number, TO:0000485 - sterility related trait
PH	LOC_Os01g66290	1	38500880	38505127	+	38538838	OsMADS21 20- 20MADS-box 20family 20gene 20with 20MIKCc 20type-box 2C 20expressed	QTN	ISAH_WS2021	MADS21	OsMADS21, RMADS207	MADS BOX GENE 21	MADS box gene21, MADS-box transcription factor 21	TRANSCRIPTION FACTOR MADS21	Other, Reproductive organ - panicle	Os01g0886200		GO:0005634 - nucleus, GO:0043565 - sequence-specific DNA binding, GO:0010229 - inflorescence development, GO:0003700 - transcription factor activity, GO:0006355 - regulation of transcription, DNA-dependent, GO:0006350 - transcription	TO:0000621 - inflorescence development trait	PO:0001083 - inflorescence development stage
PH	LOC_Os01g66300	1	38509123	38513616	+	38538838	KH 20domain 20containing 20protein 2C 20putative 2C 20expressed	QTN	ISAH_WS2021
PH	LOC_Os01g66320	1	38517502	38520259	-	38538838	expressed 20protein	QTN	ISAH_WS2021
PH	LOC_Os01g66330	1	38520632	38526409	-	38538838	ATP-dependent 20Clp 20protease 20ATP-binding 20subunit 20clpX 2C 20putative 2C 20expressed	QTN	ISAH_WS2021	_	OsSTA38	_			Reproductive organ - Spikelet, flower, glume, awn	Os01g0886600				PO:0009066 - anther
PH	LOC_Os01g66340	1	38527961	38528185	+	38538838	expressed 20protein	QTN	ISAH_WS2021
PH	LOC_Os01g66350	1	38534823	38540370	+	38538838	DUF647 20domain 20containing 20protein 2C 20putative 2C 20expressed	genic, QTN	ISAH, ISAH_WS2021, WS20	RUS6A	OsRUS6A	ROOT UV-B SENSITIVE 6A				Os01g0886900
PH	LOC_Os01g66360	1	38541818	38546204	+	38538838	2-C-methyl-D-erythritol 204-phosphate 20cytidylyltransferase 2C 20putative 2C 20expressed	QTN	ISAH_WS2021	CMS	OsCMS, OsIspD, IspD, OsMCT, MCT	_	4-(cytidine 5'-diphospho)-2-C-methyl-D-erythritol synthase, CDP-ME synthase, 2-C-methyl-D-erythritol 4-phosphate cytidylyltransferase		Biochemical character, Tolerance and resistance - Disease resistance, Tolerance and resistance - Stress tolerance	Os01g0887100		GO:0009570 - chloroplast stroma, GO:0019288 - isopentenyl diphosphate biosynthetic process, mevalonate-independent pathway, GO:0009416 - response to light stimulus, GO:0050518 - 2-C-methyl-D-erythritol 4-phosphate cytidylyltransferase activity	TO:0000075 - light sensitivity
PH	LOC_Os01g66379	1	38545579	38558381	-	38538838	expressed 20protein	QTN	ISAH_WS2021
PH	LOC_Os01g66400	1	38559137	38559669	+	38538838	expressed 20protein	QTN	ISAH_WS2021
PH	LOC_Os01g66420	1	38566147	38570861	-	38538838	PHD 20finger 20protein 2C 20putative 2C 20expressed	QTN	ISAH_WS2021	PHD1	OsPHD1, OsAL1.2, AL1.2	PHD FINGER PROTEIN 1	Plant homeo-domain finger protein 1, PHD finger protein 1, Alfin-like 1.2	PHD FINGER PROTEIN 1	Tolerance and resistance - Stress tolerance	Os01g0887700		GO:0006355 - regulation of transcription, DNA-dependent, GO:0005634 - nucleus, GO:0009651 - response to salt stress, GO:0042542 - response to hydrogen peroxide, GO:0006979 - response to oxidative stress, GO:0009409 - response to cold, GO:0003712 - transcription cofactor activity, GO:0046872 - metal ion binding, GO:0009408 - response to heat, GO:0006970 - response to osmotic stress, GO:0042393 - h…	TO:0000303 - cold tolerance, TO:0000172 - jasmonic acid sensitivity, TO:0000166 - gibberellic acid sensitivity, TO:0000173 - ethylene sensitivity, TO:0000615 - abscisic acid sensitivity, TO:0000095 - osmotic response sensitivity, TO:0000259 - heat tolerance, TO:0002657 - oxidative stress, TO:0006001 - salt tolerance
PH	LOC_Os01g66440	1	38574115	38580107	+	38538838	expressed 20protein	QTN	ISAH_WS2021
PH	LOC_Os01g66450	1	38582407	38585317	+	38538838	retrotransposon 20protein 2C 20putative 2C 20unclassified 2C 20expressed	QTN	ISAH_WS2021
PH	LOC_Os01g66460	1	38585647	38588740	-	38538838	retrotransposon 20protein 2C 20putative 2C 20Ty3-gypsy 20subclass 2C 20expressed	QTN	ISAH_WS2021
PH	LOC_Os01g66470	1	38588927	38591752	-	38538838	retrotransposon 20protein 2C 20putative 2C 20Ty3-gypsy 20subclass 2C 20expressed	QTN	ISAH_WS2021
PH	LOC_Os01g66490	1	38611435	38614057	+	38538838	no 20apical 20meristem 20protein 2C 20putative 2C 20expressed	QTN	ISAH_WS2021	NAC75	ONAC075, ONAC75	NAC DOMAIN-CONTAINING PROTEIN 75	NAC domain-containing protein 075, NAC domain-containing protein 75	NAC DOMAIN-CONTAINING PROTEIN 75	Other	Os01g0888300		GO:0006355 - regulation of transcription, DNA-dependent, GO:0003677 - DNA binding
PH	LOC_Os01g66500	1	38618736	38623836	-	38538838	phosphoribosylformylglycinamidine 20synthase 2C 20putative 2C 20expressed	QTN	ISAH_WS2021	FGAMS	OsFGAMS	FGAM SYNTHETASE	FGAM synthetase	FGAM SYNTHETASE	Biochemical character	Os01g0888500		GO:0005737 - cytoplasm, GO:0004642 - phosphoribosylformylglycinamidine synthase activity, GO:0006189 - 'de novo' IMP biosynthetic process
PH	LOC_Os01g66510	1	38627746	38632480	+	38538838	MLO 20domain 20containing 20protein 2C 20putative 2C 20expressed	QTN	ISAH_WS2021	MLO_	OsMLO5, OsMLO2	POWDERY-MILDEW-RESISTANCE GENE O_	powdery-MiLdew-resistance gene O5, powdery-MiLdew-resistance gene O2, Mildew resistance Locus O-2	POWDERY-MILDEW-RESISTANCE PROTEIN O_	Tolerance and resistance - Stress tolerance, Tolerance and resistance - Disease resistance	Os01g0888600		GO:0050832 - defense response to fungus, GO:0008219 - cell death, GO:0016021 - integral to membrane, GO:0009408 - response to heat	TO:0000074 - blast disease, TO:0000259 - heat tolerance	PO:0009046 - flower
PH	LOC_Os01g66520	1	38631343	38635651	-	38538838	serine 2Fthreonine-protein 20kinase 20RIO-like 2C 20putative 2C 20expressed	QTN	ISAH_WS2021
PH	LOC_Os01g66530	1	38637331	38638234	+	38538838	ARGOS 2C 20putative 2C 20expressed	QTN	ISAH_WS2021
PH	LOC_Os01g67070	1	38938902	38939459	+	39032129	expressed 20protein	QTN	IGKV_WS2020
PH	LOC_Os01g67080	1	38943037	38945638	-	39032129	expressed 20protein	QTN	IGKV_WS2020
PH	LOC_Os01g67090	1	38946700	38950827	+	39032129	IQ 20calmodulin-binding 20motif 20domain 20containing 20protein 2C 20expressed	QTN	IGKV_WS2020
PH	LOC_Os01g67100	1	38953663	38960231	+	39032129	expressed 20protein	QTN	IGKV_WS2020	_	FSM, FAS1	_	FLATENNED SHOOT MERISTEM, FASCIATA1, CAF-1 p150 subunit, p150 subunit of chromatin assembly factor-1		Vegetative organ - Root	Os01g0896300		GO:0006355 - regulation of transcription, DNA-dependent, GO:0006351 - transcription, DNA-dependent, GO:0006281 - DNA repair, GO:0006310 - DNA recombination, GO:0005634 - nucleus, GO:0010449 - root meristem growth, GO:0010448 - vegetative meristem growth, GO:0007090 - regulation of S phase of mitotic cell cycle, GO:0016568 - chromatin modification
PH	LOC_Os01g67110	1	38959324	38960235	-	39032129	expressed 20protein	QTN	IGKV_WS2020
PH	LOC_Os01g67120	1	38961303	38966131	-	39032129	rhodanese-like 20domain 20containing 20protein 2C 20putative 2C 20expressed	QTN	IGKV_WS2020	STR10	OsStr10	SULFURTRANSFERASE 10	Sulfurtransferase 10	SULFURTRANSFERASE 10		Os01g0896500
PH	LOC_Os01g67134	1	38973740	38976158	+	39032129	ribosomal 20L18p 2FL5e 20family 20protein 2C 20putative 2C 20expressed	QTN	IGKV_WS2020	RPL5	rpl5, RL5, RPL18p/L5e, RPL18p, RPL5e, OsRPL5, OsRPL5e, OsRPL18p	RIBOSOMAL PROTEIN L5	ribosomal protein L5, Ribosomal protein L5a, Ribosomal protein L5b	RIBOSOMAL PROTEIN L5	Tolerance and resistance - Disease resistance, Tolerance and resistance - Stress tolerance, Other	Os01g0896800		GO:0009751 - response to salicylic acid stimulus, GO:0008097 - 5S rRNA binding, GO:0006412 - translation, GO:0005840 - ribosome, GO:0000027 - ribosomal large subunit assembly, GO:0003735 - structural constituent of ribosome, GO:0042742 - defense response to bacterium, GO:0005634 - nucleus, GO:0009414 - response to water deprivation, GO:0042542 - response to hydrogen peroxide, GO:0009753 - respons…	TO:0000175 - bacterial blight disease resistance, TO:0000303 - cold tolerance, TO:0000172 - jasmonic acid sensitivity, TO:0000259 - heat tolerance, TO:0002657 - oxidative stress, TO:0000276 - drought tolerance	PO:0020032 - plumule , PO:0009009 - plant embryo , PO:0009089 - endosperm , PO:0009006 - shoot system , PO:0025034 - leaf
PH	LOC_Os01g67150	1	38977611	38980231	-	39032129	expressed 20protein	QTN	IGKV_WS2020
PH	LOC_Os01g67170	1	38986663	38990488	+	39032129	expressed 20protein	QTN	IGKV_WS2020
PH	LOC_Os01g67180	1	38990769	38993804	-	39032129	ribonuclease 20T2 20family 20domain 20containing 20protein 2C 20expressed	QTN	IGKV_WS2020	RNS2	OsRNS2	RIBONUCLEASE 2	RNase 2	RIBONUCLEASE 2	Tolerance and resistance - Stress tolerance, Biochemical character	Os01g0897200		GO:0033897 - ribonuclease T2 activity, GO:0003723 - RNA binding, GO:0016036 - cellular response to phosphate starvation, GO:0042594 - response to starvation	TO:0000102 - phosphorus sensitivity	PO:0025034 - leaf , PO:0020104 - leaf sheath , PO:0009046 - flower , PO:0009049 - inflorescence , PO:0009005 - root , PO:0009010 - seed
PH	LOC_Os01g67190	1	38994469	38997523	-	39032129	ribonuclease 20T2 20family 20domain 20containing 20protein 2C 20expressed	QTN	IGKV_WS2020	RNS6	OsRNS6	RIBONUCLEASE 6	RNase 6	RIBONUCLEASE 6	Tolerance and resistance - Stress tolerance, Biochemical character	Os01g0897300		GO:0003723 - RNA binding, GO:0033897 - ribonuclease T2 activity, GO:0016036 - cellular response to phosphate starvation, GO:0042594 - response to starvation	TO:0000102 - phosphorus sensitivity	PO:0025034 - leaf , PO:0020104 - leaf sheath , PO:0009046 - flower
PH	LOC_Os01g67200	1	38998277	39000000	+	39032129	ribosomal 20protein 20L13 20family 20protein 2C 20putative 2C 20expressed	QTN	IGKV_WS2020
PH	LOC_Os01g67210	1	39000682	39002903	+	39032129	PPR 20repeat 20domain 20containing 20protein 2C 20putative 2C 20expressed	QTN	IGKV_WS2020	_	ppr564, PPR564	_	pentatricopeptide repeat 564			Os01g0897500
PH	LOC_Os01g67220	1	39004988	39010626	+	39032129	Os1bglu4 20- 20beta-glucosidase-like 20protein 20without 20signal 20sequence 2C 20expressed	QTN	IGKV_WS2020	BH1	BGLU4, Os1bglu4, Os1Bglu4, Os1BGlu4, OsBH1	BROWN HULL 1	beta-glucosidase 4, brown hull 1	BETA-GLUCOSIDASE 4	Coloration - Anthocyanin, Reproductive organ - panicle, Coloration - Chlorophyll, Character as QTL - Yield and productivity, Seed - Morphological traits - Grain shape, Reproductive organ - Spikelet, flower, glume, awn, Biochemical character	Os01g0897600		GO:0005975 - carbohydrate metabolic process, GO:0008422 - beta-glucosidase activity, GO:0005737 - cytoplasm, GO:0043067 - regulation of programmed cell death, GO:0009863 - salicylic acid mediated signaling pathway	TO:0000328 - sucrose content, TO:0000259 - heat tolerance, TO:0000201 - panicle color, TO:0000293 - chlorophyll-a content, TO:0000295 - chlorophyll-b content, TO:0000071 - anthocyanin content, TO:0000734 - grain length, TO:0000455 - seed set percent, TO:0000605 - hydrogen peroxide content, TO:0001015 - photosynthetic rate, TO:0000207 - plant height, TO:0000340 - total soluble sugar content, TO:00…	PO:0009051 - spikelet , PO:0009049 - inflorescence , PO:0009005 - root
PH	LOC_Os01g67240	1	39013759	39017951	-	39032129	formin-like 20protein 201 20precursor 2C 20putative 2C 20expressed	QTN	IGKV_WS2020	_	OsFH1, FH1	_	Formin homology 1, type I Formin, forming family protein 1, FH2 protein 1, FH2 domain protein 1	_	Vegetative organ - Root	Os01g0897700		GO:0030036 - actin cytoskeleton organization, GO:0016021 - integral to membrane, GO:0016020 - membrane
PH	LOC_Os01g67250	1	39025095	39035050	-	39032129	Rad21 20 2F 20Rec8 20like 20protein 2C 20putative 2C 20expressed	QTN	IGKV_WS2020	RAD21	OsRad21, OsRAD21-1, REC8	RAD21 PROTEIN	Rad21 protein	RAD21 PROTEIN	Biochemical character	Os01g0897800		GO:0000228 - nuclear chromosome
PH	LOC_Os01g67260	1	39040631	39042122	-	39032129	expressed 20protein	QTN	IGKV_WS2020
PH	LOC_Os01g67280	1	39049840	39051530	-	39032129	expressed 20protein	QTN	IGKV_WS2020
PH	LOC_Os01g67290	1	39052262	39058974	-	39032129	cyclin-related 20protein 2C 20putative 2C 20expressed	QTN	IGKV_WS2020	_		_	SRL2-like gene, semi-rolled leaf 2-like gene			Os01g0898300
PH	LOC_Os01g67300	1	39063497	39065531	+	39032129	expressed 20protein	QTN	IGKV_WS2020
PH	LOC_Os01g67310	1	39066175	39068651	+	39032129	patatin 2C 20putative 2C 20expressed	QTN	IGKV_WS2020	PPLAIIALPHA	OsEnS-20, OspPLAIIalpha, pPLAIIalpha, PAT2, PAT	PATATIN-RELATED PHOSPHOLIPASE A II ALPHA	endosperm-specific gene 20, Patatin-related phospholipase A II alpha, patatin-like protein 2, patatin-like protein	PATATIN-RELATED PHOSPHOLIPASE A II ALPHA	Biochemical character	Os01g0898500		GO:0006629 - lipid metabolic process, GO:0016298 - lipase activity, GO:0016042 - lipid catabolic process, GO:0006952 - defense response
PH	LOC_Os01g67314	1	39070132	39072668	-	39032129	expressed 20protein	QTN	IGKV_WS2020
PH	LOC_Os01g67320	1	39078556	39082141	+	39032129	expressed 20protein	QTN	IGKV_WS2020
PH	LOC_Os01g67330	1	39085081	39091029	+	39032129	nucleotide-sugar 20transporter 20family 20protein 2C 20putative 2C 20expressed	QTN	IGKV_WS2020
PH	LOC_Os01g67340	1	39091728	39095339	-	39032129	STRUBBELIG-RECEPTOR 20FAMILY 208 20precursor 2C 20putative 2C 20expressed	QTN	IGKV_WS2020	RLCK52	OsRLCK52	RECEPTOR-LIKE CYTOPLASMIC KINASE 52	Receptor-like Cytoplasmic Kinase 52	RECEPTOR-LIKE CYTOPLASMIC KINASE 52	Tolerance and resistance - Disease resistance, Seed, Reproductive organ - panicle	Os01g0899000		GO:0010229 - inflorescence development, GO:0042742 - defense response to bacterium, GO:0048316 - seed development, GO:0050832 - defense response to fungus, GO:0005524 - ATP binding, GO:0004713 - protein tyrosine kinase activity	TO:0000621 - inflorescence development trait, TO:0000175 - bacterial blight disease resistance, TO:0000074 - blast disease, TO:0000653 - seed development trait	PO:0001083 - inflorescence development stage , PO:0001170 - seed development stage , PO:0009010 - seed , PO:0009049 - inflorescence
PH	LOC_Os01g67350	1	39099009	39101767	+	39032129	cysteine 20protease 2C 20putative 2C 20expressed	QTN	IGKV_WS2020	_	RMP6	_	rice microspore-preferred 6		Biochemical character	Os01g0899100		GO:0009556 - microsporogenesis, GO:0008234 - cysteine-type peptidase activity		PO:0001007 - pollen development stage
PH	LOC_Os01g67360	1	39102276	39105764	-	39032129	methyltransferase 2C 20putative 2C 20expressed	QTN	IGKV_WS2020
PH	LOC_Os01g67364	1	39114681	39117532	+	39032129	retrotransposon 20protein 2C 20putative 2C 20Ty3-gypsy 20subclass 2C 20expressed	QTN	IGKV_WS2020	_		_	callose synthase		Biochemical character, Tolerance and resistance - Insect resistance	Os01g0899387		GO:0002213 - defense response to insect	TO:0000261 - insect damage resistance
PH	LOC_Os01g67370	1	39129736	39134858	-	39032129	expressed 20protein	QTN	IGKV_WS2020	_		_	expressed protein		Tolerance and resistance - Stress tolerance	Os01g0899500		GO:0009651 - response to salt stress	TO:0006001 - salt tolerance
PH	LOC_Os01g68010	1	39538143	39541096	-	39637502	TBC 20domain 20containing 20protein 2C 20expressed	QTN	ISARC_WS2021
PH	LOC_Os01g68020	1	39544224	39548624	+	39637502	BTBZ2 20- 20Bric-a-Brac 2C 20Tramtrack 2C 20and 20Broad 20Complex 20BTB 20domain 20with 20TAZ 20zinc 20finger 20and 20Calmodulin-binding 20domains 2C 20expressed	QTN	ISARC_WS2021	BT	OsBT, OsBTBZ2, BTBZ2	_	BT1/BT2 ortholog, BTB-type E3 ubiquitin ligase Z2		Tolerance and resistance - Stress tolerance, Other	Os01g0908200		GO:0042594 - response to starvation, GO:0015706 - nitrate transport, GO:0008270 - zinc ion binding, GO:0006355 - regulation of transcription, DNA-dependent, GO:0005634 - nucleus, GO:0004402 - histone acetyltransferase activity, GO:0003712 - transcription cofactor activity, GO:0009651 - response to salt stress	TO:0000329 - tillering ability, TO:0000429 - salt sensitivity, TO:0000011 - nitrogen sensitivity
PH	LOC_Os01g68030	1	39549164	39550832	-	39637502	expressed 20protein	QTN	ISARC_WS2021
PH	LOC_Os01g68040	1	39551421	39555254	-	39637502	CorA-like 20magnesium 20transporter 20protein 2C 20putative 2C 20expressed	QTN	ISARC_WS2021	MRS2-3	OsMRS2-3	MRS2/MGT FAMILY MEMBER 3	MRS2/MGT family member 3	MRS2/MGT FAMILY MEMBER 3	Biochemical character	Os01g0908500		GO:0016021 - integral to membrane, GO:0015095 - magnesium ion transmembrane transporter activity
PH	LOC_Os01g68050	1	39562495	39565691	+	39637502	transmembrane 20amino 20acid 20transporter 20protein 2C 20putative 2C 20expressed	QTN	ISARC_WS2021	PROT1	OsProT1, ProT1	PROLINE TRANSPORTER 1	proline transporter 1, Pro transporter 1	PROLINE TRANSPORTER 1	Tolerance and resistance - Stress tolerance, Biochemical character	Os01g0908600		GO:0015812 - gamma-aminobutyric acid transport, GO:0015824 - proline transport, GO:0005886 - plasma membrane, GO:0046686 - response to cadmium ion, GO:0016021 - integral to membrane		PO:0020104 - leaf sheath , PO:0005004 - shoot node
PH	LOC_Os01g68060	1	39565751	39570176	-	39637502	copine 2C 20putative 2C 20expressed	QTN	ISARC_WS2021	RING86	OsRFP, OsRING86, OsvWA2, vWA2, OsRGLG1, RGLG1	RING-TYPE E3 UBIQUITIN LIGASE 86	RING finger protein, RING-type E3 ubiquitin ligase 86, von Willebrand factor A2, RING DOMAIN LIGASE1, RING DOMAIN LIGASE 1	RING-TYPE E3 UBIQUITIN LIGASE 86	Tolerance and resistance - Disease resistance, Tolerance and resistance - Stress tolerance	Os01g0908700		GO:0009414 - response to water deprivation, GO:0050832 - defense response to fungus, GO:0042742 - defense response to bacterium, GO:0070534 - protein K63-linked ubiquitination, GO:0002238 - response to molecule of fungal origin, GO:0008270 - zinc ion binding	TO:0000276 - drought tolerance, TO:0000074 - blast disease, TO:0000175 - bacterial blight disease resistance, TO:0000203 - bacterial leaf streak disease resistance
PH	LOC_Os01g68070	1	39577048	39580186	+	39637502	PPR 20repeat 20containing 20protein 2C 20expressed	QTN	ISARC_WS2021
PH	LOC_Os01g68080	1	39580495	39581405	-	39637502	harpin-induced 20protein 201 20domain 20containing 20protein 2C 20expressed	QTN	ISARC_WS2021
PH	LOC_Os01g68090	1	39582355	39583722	-	39637502	harpin-induced 20protein 201 20domain 20containing 20protein 2C 20expressed	QTN	ISARC_WS2021
PH	LOC_Os01g68104	1	39588269	39591239	+	39637502	ZOS1-21 20- 20C2H2 20zinc 20finger 20protein 2C 20expressed	QTN	ISARC_WS2021	HDT2	OsHDT2	HISTONE DEACETYLASE 2	histone deacetylase OsHDT2	HISTONE DEACETYLASE 2	Biochemical character	Os01g0909100		GO:0004407 - histone deacetylase activity
PH	LOC_Os01g68120	1	39595681	39605717	-	39637502	DCL3 2C 20putative 2C 20expressed	QTN	ISARC_WS2021	DCL3A	OsDCL3a	DICER-LIKE 3A	Endoribonuclease Dicer homolog 3a, Dicer-like protein 3a	DICER-LIKE PROTEIN 3A	Vegetative organ - Leaf, Tolerance and resistance - Disease resistance, Biochemical character, Reproductive organ - Inflorescence, Vegetative organ - Culm	Os01g0909200		GO:0005524 - ATP binding, GO:0005634 - nucleus, GO:0006396 - RNA processing, GO:0003723 - RNA binding, GO:0050832 - defense response to fungus, GO:0004386 - helicase activity, GO:0004525 - ribonuclease III activity, GO:0030145 - manganese ion binding, GO:0031047 - gene silencing by RNA, GO:0000287 - magnesium ion binding, GO:0003677 - DNA binding	TO:0000557 - secondary branch number, TO:0000124 - flag leaf angle, TO:0000074 - blast disease, TO:0000207 - plant height
PH	LOC_Os01g68130	1	39608023	39612003	+	39637502	expressed 20protein	QTN	ISARC_WS2021
PH	LOC_Os01g68140	1	39612598	39614338	-	39637502	expressed 20protein	QTN	ISARC_WS2021
PH	LOC_Os01g68160	1	39616197	39633854	-	39637502,39620806	ZOS1-22 20- 20C2H2 20zinc 20finger 20protein 2C 20expressed	genic, QTN	ISARC, ISARC_WS2021
PH	LOC_Os01g68179	1	39634679	39635421	+	39637502,39620806	expressed 20protein	nongenic, QTN	ISARC, ISARC_WS2021
PH	LOC_Os01g68200	1	39638781	39641275	+	39637502,39620806	expressed 20protein	nongenic, QTN	ISARC, ISARC_WS2021
PH	LOC_Os01g68230	1	39654634	39657986	-	39637502	expressed 20protein	QTN	ISARC_WS2021
PH	LOC_Os01g68240	1	39657943	39660633	+	39637502	expressed 20protein	QTN	ISARC_WS2021
PH	LOC_Os01g68260	1	39666655	39670332	+	39637502	lysine 20ketoglutarate 20reductase 20trans-splicing 20related 201 2C 20putative 2C 20expressed	QTN	ISARC_WS2021
PH	LOC_Os01g68269	1	39670739	39672248	+	39637502	expressed 20protein	QTN	ISARC_WS2021
PH	LOC_Os01g68300	1	39682834	39683442	-	39637502	expressed 20protein	QTN	ISARC_WS2021
PH	LOC_Os01g68310	1	39684922	39687007	-	39637502	sas10 2FUtp3 20family 20protein 2C 20expressed	QTN	ISARC_WS2021
PH	LOC_Os01g68320	1	39688260	39693159	-	39637502	DEAD-box 20ATP-dependent 20RNA 20helicase 2030 2C 20putative 2C 20expressed	QTN	ISARC_WS2021	_	OsRH30	_	RNA helicase 30			Os01g0911100		GO:0005524 - ATP binding, GO:0003723 - RNA binding, GO:0000184 - nuclear-transcribed mRNA catabolic process, nonsense-mediated decay, GO:0006364 - rRNA processing, GO:0005634 - nucleus, GO:0008026 - ATP-dependent helicase activity
PH	LOC_Os01g68324	1	39695963	39703207	+	39637502	dolichyl-diphosphooligosaccharide--protein 20glycosyltransferase 2063 20kDasubunit 20precursor 2C 20putative 2C 20expressed	QTN	ISARC_WS2021	_		_	Glycosyltransferase 63 kDa subunit precursor, Ribophorin II		Biochemical character	Os01g0911200		GO:0005739 - mitochondrion, GO:0006487 - protein amino acid N-linked glycosylation, GO:0008250 - oligosaccharyltransferase complex, GO:0009506 - plasmodesma, GO:0016021 - integral to membrane, GO:0016757 - transferase activity, transferring glycosyl groups, GO:0009505 - plant-type cell wall, GO:0009409 - response to cold, GO:0005774 - vacuolar membrane, GO:0005886 - plasma membrane, GO:0005794 - …
PH	LOC_Os01g68330	1	39703820	39708403	-	39637502	antigen 20peptide 20transporter-like 201 2C 20chloroplast 20precursor 2C 20putative 2C 20expressed	QTN	ISARC_WS2021	ABCB24	OsABCB24	ABC TRANSPORTER B FAMILY MEMBER 24	ABC transporter superfamily ABCB subgroup member 24	ABC TRANSPORTER B FAMILY MEMBER 24	Biochemical character	Os01g0911300		GO:0006200 - ATP catabolic process, GO:0005524 - ATP binding, GO:0016021 - integral to membrane, GO:0042626 - ATPase activity, coupled to transmembrane movement of substances
PH	LOC_Os01g68340	1	39710856	39712912	+	39637502	retrotransposon 20protein 2C 20putative 2C 20unclassified 2C 20expressed	QTN	ISARC_WS2021
PH	LOC_Os01g68350	1	39713729	39717622	-	39637502	retrotransposon 20protein 2C 20putative 2C 20unclassified 2C 20expressed	QTN	ISARC_WS2021
PH	LOC_Os01g68370	1	39723155	39726988	-	39637502	B3 20DNA 20binding 20domain 20containing 20protein 2C 20expressed	QTN	ISARC_WS2021	VP1	Vp1* (OSVP1), OsVP1, OsVp1, Vp1, ABI3, OsABI3, OsLFL4, OsVp-1, OSVP1	VIVIPAROUS 1	Viviparous-1, Protein viviparous homolog, B3 domain-containing protein VP1, Transcription activator VP1-rice, LEAFY COTYLEDON 2 and FUSCA 3-LIKE 4	B3 DOMAIN-CONTAINING PROTEIN VP1	Tolerance and resistance - Stress tolerance, Seed - Physiological traits - Dormancy, Character as QTL - Germination	Os01g0911700		GO:0045449 - regulation of transcription, GO:0009414 - response to water deprivation, GO:0005634 - nucleus, GO:0003677 - DNA binding, GO:0034059 - response to anoxia, GO:0006350 - transcription, GO:0006355 - regulation of transcription, DNA-dependent, GO:0017163 - basal transcription repressor activity, GO:0009845 - seed germination, GO:0009790 - embryonic development, GO:0009738 - abscisic acid …	TO:0000428 - callus induction, TO:0000163 - auxin sensitivity, TO:0000253 - seed dormancy, TO:0000619 - vivipary, TO:0001007 - coleoptile length, TO:0000615 - abscisic acid sensitivity, TO:0000276 - drought tolerance	PO:0009010 - seed , PO:0007057 - 0 seed germination stage
PH	LOC_Os01g68380	1	39729980	39736817	+	39637502	expressed 20protein	QTN	ISARC_WS2021
PH	LOC_Os01g70990	1	41090303	41090680	+	41094757	OsGrx_C6 20- 20glutaredoxin 20subgroup 20III 2C 20expressed	nongenic	WS21	GRX7	OsGRX7	GLUTAREDOXIN 7	glutaredoxin 7	GLUTAREDOXIN 7	Biochemical character	Os01g0936000		GO:0015035 - protein disulfide oxidoreductase activity, GO:0046872 - metal ion binding, GO:0009055 - electron carrier activity, GO:0045454 - cell redox homeostasis, GO:0005737 - cytoplasm
PH	LOC_Os01g71000	1	41095905	41100367	+	41094757	protein 20kinase 20APK1B 2C 20chloroplast 20precursor 2C 20putative 2C 20expressed	nongenic	WS21	RLCK55	OsRLCK55	RECEPTOR-LIKE CYTOPLASMIC KINASE 55	Receptor-like Cytoplasmic Kinase 55	RECEPTOR-LIKE CYTOPLASMIC KINASE 55	Tolerance and resistance - Disease resistance, Tolerance and resistance	Os01g0936100		GO:0009611 - response to wounding, GO:0042742 - defense response to bacterium, GO:0004674 - protein serine/threonine kinase activity, GO:0005524 - ATP binding, GO:0005886 - plasma membrane, GO:0050832 - defense response to fungus	TO:0000175 - bacterial blight disease resistance, TO:0000074 - blast disease
PH	LOC_Os01g71020	1	41106628	41106936	+	41094757 , 41111473	expressed 20protein	nongenic	WS21
PH	LOC_Os01g71040	1	41112004	41114858	-	41094757 , 41111473	expressed 20protein	nongenic	WS21	_	OsSTA43	_			Reproductive organ - Spikelet, flower, glume, awn	Os01g0936700				PO:0009066 - anther
PH	LOC_Os02g08220	2	4350872	4352048	+	47721028	expressed 20protein	QTN	IGKV_WS2021	_	OsbHLH157, bHLH157	_	basic helix-loop-helix protein 157			Os02g0178700		GO:0005634 - nucleus
PH	LOC_Os02g08230	2	4355045	4362388	-	47721028	WAX2 2C 20putative 2C 20expressed	QTN	IGKV_WS2021	GL1-2	OsGL1-2, WAX2, OsWAX2	GLOSSY1-HOMOLOGOUS GENE 2	Glossy1-homologous gene 2	GLOSSY1-HOMOLOGOUS PROTEIN 2	Tolerance and resistance - Stress tolerance, Biochemical character	Os02g0178800		GO:0005506 - iron ion binding, GO:0006633 - fatty acid biosynthetic process, GO:0010025 - wax biosynthetic process, GO:0046184 - aldehyde biosynthetic process, GO:0043447 - alkane biosynthetic process, GO:0016491 - oxidoreductase activity, GO:0016021 - integral to membrane	TO:0000276 - drought tolerance, TO:0000709 - leaf gloss
PH	LOC_Os02g08240	2	4376788	4380323	+	47721028	STE_PAK_Ste20_STLK.1 20- 20STE 20kinases 20include 20homologs 20to 20sterile 207 2C 20sterile 2011 20and 20sterile 2020 20from 20yeast 2C 20expressed	QTN	IGKV_WS2021	_	OsSTA49	_			Reproductive organ - Spikelet, flower, glume, awn	Os02g0179000				PO:0009066 - anther
PH	LOC_Os02g08250	2	4380626	4381921	+	47721028	expressed 20protein	QTN	IGKV_WS2021
PH	LOC_Os02g08260	2	4384188	4388042	+	47721028	HD 20domain 20containing 20protein 202 2C 20putative 2C 20expressed	QTN	IGKV_WS2021
PH	LOC_Os02g08270	2	4390133	4393564	-	47721028	class 20I 20glutamine 20amidotransferase 2C 20putative 2C 20expressed	QTN	IGKV_WS2021
PH	LOC_Os02g08300	2	4407946	4412805	+	47721028	RAD23 20DNA 20repair 20protein 2C 20putative 2C 20expressed	QTN	IGKV_WS2021	_	Rad23	_	RAD23 DNA repair protein		Biochemical character	Os02g0179300		GO:0005634 - nucleus, GO:0043161 - proteasomal ubiquitin-dependent protein catabolic process, GO:0006289 - nucleotide-excision repair, GO:0003684 - damaged DNA binding
PH	LOC_Os02g08310	2	4412800	4415060	-	47721028	tubby 2C 20putative 2C 20expressed	QTN	IGKV_WS2021	TLP4	OsTLP13, TLP13, OsTLP4	TUBBY-LIKE PROTEIN 4	Tubby-like protein 4, tubby-like protein 13	TUBBY-LIKE PROTEIN 4	Tolerance and resistance - Disease resistance	Os02g0179400
PH	LOC_Os02g08320	2	4423146	4424236	+	47721028	haemolysin-III 2C 20putative 2C 20expressed	QTN	IGKV_WS2021
PH	LOC_Os02g08330	2	4424439	4426620	-	47721028	gp176 2C 20putative 2C 20expressed	QTN	IGKV_WS2021	VWA4	OsvWA4, vWA4	VON WILLEBRAND FACTOR A4	von Willebrand factor A4	VON WILLEBRAND FACTOR A4	Tolerance and resistance - Stress tolerance, Tolerance and resistance - Disease resistance	Os02g0179600		GO:0050832 - defense response to fungus, GO:0009645 - response to low light intensity stimulus, GO:0046686 - response to cadmium ion, GO:0010044 - response to aluminum ion	TO:0000354 - aluminum sensitivity, TO:0000074 - blast disease, TO:0000460 - light intensity sensitivity
PH	LOC_Os02g08350	2	4432874	4438116	-	47721028	expressed 20protein	QTN	IGKV_WS2021
PH	LOC_Os02g08360	2	4440184	4448768	+	47721028	RNA 20recognition 20motif 2C 20putative 2C 20expressed	QTN	IGKV_WS2021
PH	LOC_Os02g08364	2	4449777	4454808	+	47721028	protein 20phosphatase 202C 2C 20putative 2C 20expressed	QTN	IGKV_WS2021	PP2C11	OsPP2C11, OsPP19	PROTEIN PHOSPHATASE 2C11	protein phosphatase 2C11, protein phosphatase 2C 11, protein phosphatase 19	PROTEIN PHOSPHATASE 2C11		Os02g0180000		GO:0005886 - plasma membrane, GO:0046872 - metal ion binding, GO:0009737 - response to abscisic acid stimulus, GO:0006470 - protein amino acid dephosphorylation, GO:0004722 - protein serine/threonine phosphatase activity
PH	LOC_Os02g08370	2	4454840	4457748	-	47721028	ubiquitin 20carboxyl-terminal 20hydrolase 2C 20family 201 2C 20putative 2C 20expressed	QTN	IGKV_WS2021	UCH1	OsUCH1	UBIQUITIN C-TERMINAL HYDROLASE 1	ubiquitin C-terminal hydrolase 1	UBIQUITIN C-TERMINAL HYDROLASE 1	Biochemical character	Os02g0180100		GO:0006511 - ubiquitin-dependent protein catabolic process, GO:0016579 - protein deubiquitination, GO:0004843 - ubiquitin-specific protease activity, GO:0005737 - cytoplasm
PH	LOC_Os02g08380	2	4460300	4463704	+	47721028	CR084 20protein 2C 20putative 2C 20expressed	QTN	IGKV_WS2021	LA2	OsLA2	LAZY2	LAZY 2		Tolerance and resistance - Stress tolerance, Vegetative organ - Culm	Os02g0180200		GO:0005982 - starch metabolic process, GO:0009629 - response to gravity, GO:0003677 - DNA binding, GO:0010581 - regulation of starch biosynthetic process, GO:0009630 - gravitropism, GO:0009590 - detection of gravity, GO:0009507 - chloroplast	TO:0000567 - tiller angle, TO:0002672 - auxin content, TO:0002693 - gravity response trait, TO:0000696 - starch content, TO:0000427 - culm angle
PH	LOC_Os02g08390	2	4465778	4469433	+	47721028	transposon 20protein 2C 20putative 2C 20CACTA 2C 20En 2FSpm 20sub-class 2C 20expressed	QTN	IGKV_WS2021
PH	LOC_Os02g08400	2	4481872	4483470	+	47721028	HLS 2C 20putative 2C 20expressed	QTN	IGKV_WS2021	GNAT2	OsGNAT2	_			Biochemical character	Os02g0180400		GO:0008080 - N-acetyltransferase activity, GO:0016747 - transferase activity, transferring acyl groups other than amino-acyl groups
PH	LOC_Os02g08410	2	4486471	4489409	-	47721028	chorismate 20mutase 2C 20chloroplast 20precursor 2C 20putative 2C 20expressed	QTN	IGKV_WS2021	CM2;2	OsCM2;2	CHORISMATE MUTASE 2;2	Chorismate mutase 2;2	CHORISMATE MUTASE 2;2	Biochemical character	Os02g0180500		GO:0005737 - cytoplasm, GO:0004106 - chorismate mutase activity, GO:0009073 - aromatic amino acid family biosynthetic process, GO:0046417 - chorismate metabolic process, GO:0008652 - cellular amino acid biosynthetic process
PH	LOC_Os02g08420	2	4497077	4500449	+	47721028	cinnamoyl 20CoA 20reductase 2C 20putative 2C 20expressed	QTN	IGKV_WS2021	CCR21	OsCCR21	CINNAMOYL-COA REDUCTASE 21	cinnamoyl CoA reductase 21	CINNAMOYL-COA REDUCTASE 21	Biochemical character, Tolerance and resistance - Stress tolerance, Tolerance and resistance - Disease resistance	Os02g0180700		GO:0002238 - response to molecule of fungal origin, GO:0009807 - lignan biosynthetic process, GO:0003824 - catalytic activity, GO:0044237 - cellular metabolic process, GO:0046688 - response to copper ion, GO:0009414 - response to water deprivation, GO:0050832 - defense response to fungus, GO:0006952 - defense response, GO:0009411 - response to UV, GO:0050662 - coenzyme binding, GO:0009409 - respo…	TO:0000731 - lignin content, TO:0000112 - disease resistance, TO:0000021 - copper sensitivity, TO:0000175 - bacterial blight disease resistance, TO:0000074 - blast disease, TO:0000276 - drought tolerance, TO:0000733 - lignin biosynthesis trait, TO:0000160 - UV light sensitivity, TO:0000303 - cold tolerance, TO:0000203 - bacterial leaf streak disease resistance
PH	LOC_Os02g08440	2	4542762	4544983	+	47721028	WRKY71 2C 20expressed	QTN	IGKV_WS2021	WRKY71	OsWRKY71, WRKY-71	WRKY GENE 71	Rice WRKY gene71, Rice WRKY gene 71, Transcription factor WRKY71	TRANSCRIPTION FACTOR WRKY71	Tolerance and resistance - Insect resistance, Tolerance and resistance - Disease resistance, Tolerance and resistance - Stress tolerance, Character as QTL - Germination	Os02g0181300		GO:0002213 - defense response to insect, GO:0045449 - regulation of transcription, GO:0006952 - defense response, GO:0009409 - response to cold, GO:0005634 - nucleus, GO:0009685 - gibberellin metabolic process, GO:0009414 - response to water deprivation, GO:0043565 - sequence-specific DNA binding, GO:0003677 - DNA binding, GO:0003700 - transcription factor activity, GO:0009651 - response to salt …	TO:0002693 - gravity response trait, TO:0000303 - cold tolerance, TO:0000205 - white-backed planthopper resistance, TO:0000524 - submergence tolerance, TO:0006001 - salt tolerance, TO:0000276 - drought tolerance, TO:0000175 - bacterial blight disease resistance	PO:0007045 - coleoptile emergence stage , PO:0005360 - aleurone layer , PO:0006339 - juvenile vascular leaf , PO:0007057 - 0 seed germination stage
PH	LOC_Os02g10800	2	5736604	5738853	+	49106457	mitochondrial 20carrier 20protein 2C 20putative 2C 20expressed	QTN	IGKV_WS2020	BT1-1	OsBT1-1, OsEnS-29, OsBT1, OsBt1, BT1, Bt1, OsBt1-1, shr3, OsBT1-2, BT1-2	BRITTLE 1-1	Brittle-1-1, endosperm-specific gene 29, BRITTLE1, shrunken3	BRITTLE 1-1 PROTEIN	Seed - Physiological traits - Storage substances, Seed - Physiological traits - Dormancy, Biochemical character, Tolerance and resistance - Stress tolerance, Seed - Morphological traits - Endosperm	Os02g0202400		GO:0016021 - integral to membrane, GO:0009408 - response to heat, GO:0015711 - organic anion transport, GO:0010431 - seed maturation, GO:0019252 - starch biosynthetic process, GO:0003735 - structural constituent of ribosome, GO:0005982 - starch metabolic process, GO:0010581 - regulation of starch biosynthetic process, GO:0006412 - translation, GO:0010021 - amylopectin biosynthetic process, GO:005…	TO:0002661 - seed maturation, TO:0000259 - heat tolerance, TO:0000487 - endosperm color, TO:0000253 - seed dormancy, TO:0000696 - starch content, TO:0002658 - starch grain synthesis, TO:0000100 - shrunken endosperm, TO:0000196 - amylose content, TO:0000382 - 1000-seed weight	PO:0007632 - seed maturation stage , PO:0009089 - endosperm
PH	LOC_Os02g10810	2	5740408	5742520	-	49106457	protein 20of 20unknown 20function 20domain 20containing 20protein 2C 20expressed	QTN	IGKV_WS2020	ALBA2	OsAlba2, Alba2	ACETYLATION LOWERS BINDING AFFINITY 2	acetylation lowers binding affinity protein 2, acetylation lowers binding affinity 2, Alba family protein 2		Tolerance and resistance - Stress tolerance	Os02g0202500		GO:0009737 - response to abscisic acid stimulus, GO:0009408 - response to heat, GO:0009651 - response to salt stress, GO:0003676 - nucleic acid binding, GO:0009753 - response to jasmonic acid stimulus, GO:0009751 - response to salicylic acid stimulus, GO:0009409 - response to cold	TO:0000303 - cold tolerance, TO:0006001 - salt tolerance, TO:0000259 - heat tolerance, TO:0000615 - abscisic acid sensitivity, TO:0000172 - jasmonic acid sensitivity
PH	LOC_Os02g10820	2	5744792	5748141	-	49106457	Sel1 20repeat 20domain 20containing 20protein 2C 20putative 2C 20expressed	QTN	IGKV_WS2020
PH	LOC_Os02g10830	2	5748604	5749500	-	49106457	serine 20acetyltransferase 20protein 2C 20putative 2C 20expressed	QTN	IGKV_WS2020	SAT1;2	OsSAT1;2	SERINE ACETYLTRANSFERASE 1;2	serine acetyltransferase 1;2	SERINE ACETYLTRANSFERASE 1;2	Tolerance and resistance - Stress tolerance, Biochemical character	Os02g0202700		GO:0009651 - response to salt stress	TO:0006001 - salt tolerance	PO:0025034 - leaf
PH	LOC_Os02g10840	2	5750295	5753704	-	49106457	transposon 20protein 2C 20putative 2C 20unclassified 2C 20expressed	QTN	IGKV_WS2020
PH	LOC_Os02g10850	2	5755371	5758098	-	49106457	OsFBK3 20- 20F-box 20domain 20and 20kelch 20repeat 20containing 20protein 2C 20expressed	QTN	IGKV_WS2020	_	OsFbox073, OsFbox73, Os_F0359, OsFBK3, FBK3	_	F-box protein 73, F-box-type E3 ubiquitin ligase K3			Os02g0202900
PH	LOC_Os02g10860	2	5760034	5763645	-	49106457	bZIP 20transcription 20factor 20domain 20containing 20protein 2C 20expressed	QTN	IGKV_WS2020	BZIP18	OsbZIP18	b-ZIP TRANSCRIPTION FACTOR 18	b-ZIP transcription factor 18	b-ZIP TRANSCRIPTION FACTOR 18	Character as QTL - Plant growth activity, Tolerance and resistance - Stress tolerance, Vegetative organ - Leaf, Vegetative organ - Culm, Other	Os02g0203000		GO:0003700 - transcription factor activity, GO:0043565 - sequence-specific DNA binding, GO:0030246 - carbohydrate binding, GO:0009099 - valine biosynthetic process, GO:0005634 - nucleus, GO:0042594 - response to starvation, GO:0006995 - cellular response to nitrogen starvation, GO:0010224 - response to UV-B, GO:0042427 - serotonin biosynthetic process, GO:0009082 - branched chain family amino aci…	TO:0000207 - plant height, TO:0000401 - plant growth hormone sensitivity, TO:0000601 - UV-B light sensitivity, TO:0002673 - amino acid content, TO:0000326 - leaf color, TO:0000571 - shoot fresh weight, TO:0000346 - tiller number, TO:0000605 - hydrogen peroxide content	PO:0025034 - leaf
PH	LOC_Os02g10870	2	5768300	5768731	+	49106457	hypothetical 20protein	QTN	IGKV_WS2020
PH	LOC_Os02g10880	2	5775949	5777385	+	49106457	UDP-glucoronosyl 20and 20UDP-glucosyl 20transferase 20domain 20containing 20protein 2C 20expressed	QTN	IGKV_WS2020	UGT75J1	OsUGT75J1	UDP-GLUCOSYLTRANSFERASE 75J1	UDP-glucosyltransferase 75J1	UDP-GLUCOSYLTRANSFERASE 75J1	Biochemical character	Os02g0203300		GO:0080043 - quercetin 3-O-glucosyltransferase activity, GO:0080044 - quercetin 7-O-glucosyltransferase activity, GO:0008194 - UDP-glycosyltransferase activity
PH	LOC_Os02g10890	2	5779673	5779987	+	49106457	expressed 20protein	QTN	IGKV_WS2020
PH	LOC_Os02g10900	2	5785295	5788769	-	49106457	NB-ARC 20domain 20containing 20protein 2C 20expressed	QTN	IGKV_WS2020	LRD43	RLS1, OsRLS1, OsLRD43, NOE2, OsNOE2	LESION RESEMBLING DISEASE 43	lesion resembling disease 43, rapid leaf senescence 1, NO-excess 2, nitric oxide excess 2		Vegetative organ - Leaf, Tolerance and resistance - Lesion mimic, Tolerance and resistance - Disease resistance	Os02g0203500		GO:0033484 - nitric oxide homeostasis, GO:0009416 - response to light stimulus, GO:0009646 - response to absence of light, GO:0009658 - chloroplast organization, GO:0009735 - response to cytokinin stimulus, GO:0010150 - leaf senescence, GO:0043067 - regulation of programmed cell death, GO:0043531 - ADP binding, GO:0045454 - cell redox homeostasis, GO:0010942 - positive regulation of cell death, G…	TO:0000605 - hydrogen peroxide content, TO:0000495 - chlorophyll content, TO:0000326 - leaf color, TO:0000175 - bacterial blight disease resistance, TO:0000249 - leaf senescence, TO:0002657 - oxidative stress, TO:0000063 - mimic response, TO:0000460 - light intensity sensitivity, TO:0000167 - cytokinin sensitivity, TO:0000075 - light sensitivity	PO:0001054 - 4 leaf senescence stage
PH	LOC_Os02g10920	2	5798886	5806501	-	49106457	zinc 20finger 20family 20protein 2C 20putative 2C 20expressed	QTN	IGKV_WS2020	LS1	OsSRZ1, SRZ1, OsLS1	LEAF SENESCENCE 1	stress repressive zinc finger protein 1, Leaf Senescence 1	STRESS REPRESSIVE ZINC FINGER PROTEIN 1	Tolerance and resistance - Stress tolerance, Coloration - Chlorophyll, Vegetative organ - Leaf	Os02g0203700		GO:0006974 - response to DNA damage stimulus, GO:0030104 - water homeostasis, GO:0048366 - leaf development, GO:0043067 - regulation of programmed cell death, GO:0009646 - response to absence of light, GO:0010150 - leaf senescence, GO:0005634 - nucleus, GO:0005737 - cytoplasm, GO:0008270 - zinc ion binding	TO:0000496 - carotenoid content, TO:0002662 - leaf rolling tolerance, TO:0000131 - leaf water potential, TO:0000295 - chlorophyll-b content, TO:0000293 - chlorophyll-a content, TO:0000135 - leaf length, TO:0000370 - leaf width, TO:0000326 - leaf color, TO:0002681 - leaf curling, TO:0000207 - plant height, TO:0000655 - leaf development trait, TO:0000605 - hydrogen peroxide content, TO:0000495 - ch…	PO:0001054 - 4 leaf senescence stage , PO:0001050 - leaf development stage
PH	LOC_Os02g10950	2	5816586	5819181	-	49106457	expressed 20protein	QTN	IGKV_WS2020
PH	LOC_Os02g10960	2	5824528	5825141	-	49106457	expressed 20protein	QTN	IGKV_WS2020
PH	LOC_Os02g10970	2	5826295	5834386	+	49106457	peptidyl-prolyl 20cis-trans 20isomerase 2C 20putative 2C 20expressed	QTN	IGKV_WS2020	CYP95	OsCYP95, OsCYP-6, OsCYP95a, OsCYP95b	CYCLOPHILIN 95	cyclophilin 95, cyclophilin 6	CYCLOPHILIN 95	Biochemical character
PH	LOC_Os02g10990	2	5835517	5838974	+	49106457	FAD 20binding 20domain 20of 20DNA 20photolyase 20domain 20containing 20protein 2C 20expressed	QTN	IGKV_WS2020	_		_	(6-4) DNA photolyase		Biochemical character, Tolerance and resistance - Stress tolerance	Os02g0204400		GO:0009411 - response to UV, GO:0003677 - DNA binding, GO:0000166 - nucleotide binding, GO:0006281 - DNA repair, GO:0010224 - response to UV-B, GO:0003914 - DNA (6-4) photolyase activity	TO:0000601 - UV-B light sensitivity
PH	LOC_Os02g11000	2	5841781	5847597	+	49106457	agenet 20domain 20containing 20protein 2C 20putative 2C 20expressed	QTN	IGKV_WS2020
PH	LOC_Os02g11010	2	5851856	5855893	-	49106457	expressed 20protein	QTN	IGKV_WS2020
PH	LOC_Os02g11020	2	5862711	5865569	-	49106457	cytochrome 20P450 2072A1 2C 20putative 2C 20expressed	QTN	IGKV_WS2020	CYP734A2	OsCYP734A2	CYTOCHROME P450 HYDROXYLASE 734A2	Cytochrome P450 734A2	CYTOCHROME P450 HYDROXYLASE 734A2	Vegetative organ - Shoot apical meristem(SAM), Biochemical character	Os02g0204700		GO:0005506 - iron ion binding, GO:0004497 - monooxygenase activity, GO:0009416 - response to light stimulus, GO:0040008 - regulation of growth, GO:0020037 - heme binding, GO:0016705 - oxidoreductase activity, acting on paired donors, with incorporation or reduction of molecular oxygen, GO:0016021 - integral to membrane, GO:0010268 - brassinosteroid homeostasis, GO:0016133 - brassinosteroid catabo…
PH	LOC_Os02g11030	2	5906973	5909620	-	49106457	50S 20ribosomal 20protein 20L19 2C 20chloroplast 20precursor 2C 20putative 2C 20expressed	QTN	IGKV_WS2020
PH	LOC_Os02g11040	2	5912591	5914192	-	49106457	expressed 20protein	QTN	IGKV_WS2020
PH	LOC_Os02g11050	2	5918931	5923654	-	49106457	26S 20protease 20regulatory 20subunit 2C 20putative 2C 20expressed	QTN	IGKV_WS2020	RPT6	OsRpt6, Rpt6	19S REGULATORY PARTICLE ATPASE SUBUNIT 6	19S regulatory particle ATPase subunit 6, RP triple A-ATPase 6	19S REGULATORY PARTICLE ATPASE SUBUNIT 6	Biochemical character	Os02g0205300		GO:0048236 - plant-type spore development, GO:0005524 - ATP binding, GO:0008540 - proteasome regulatory particle, base subcomplex, GO:0017025 - TATA-binding protein binding, GO:0030433 - ER-associated protein catabolic process, GO:0031595 - nuclear proteasome complex, GO:0031597 - cytosolic proteasome complex, GO:0045899 - positive regulation of RNA polymerase II transcriptional preinitiation com…	TO:0000727 - sporogenesis
PH	LOC_Os02g11060	2	5924720	5930096	+	49106457	WD 20domain 2C 20G-beta 20repeat 20domain 20containing 20protein 2C 20expressed	QTN	IGKV_WS2020	_	OsWD40-38	_				Os02g0205400		GO:0016301 - kinase activity
PH	LOC_Os02g11070	2	5930193	5933079	-	49106457	3-ketoacyl-CoA 20synthase 2C 20putative 2C 20expressed	QTN	IGKV_WS2020	KCS2	KCS, OsKCS2	3-KETOACYL-COA SYNTHASE 2	3-ketoacyl-CoA synthase	3-KETOACYL-COA SYNTHASE 2	Tolerance and resistance - Stress tolerance, Biochemical character	Os02g0205500		GO:0009651 - response to salt stress, GO:0016020 - membrane, GO:0006633 - fatty acid biosynthetic process, GO:0046686 - response to cadmium ion, GO:0009753 - response to jasmonic acid stimulus, GO:0016747 - transferase activity, transferring acyl groups other than amino-acyl groups	TO:0006001 - salt tolerance, TO:0000172 - jasmonic acid sensitivity	PO:0025034 - leaf , PO:0009005 - root
PH	LOC_Os02g11880	2	6154830	6155155	-	49426202	expressed 20protein	nongenic	ISARC, WS20
PH	LOC_Os02g11890	2	6158238	6159991	-	49426202	syntaxin-related 20protein 2C 20putative 2C 20expressed	nongenic	ISARC, WS20	SYP125	OsSYP125	SYNTAXIN OF PLANTS 125	Syntaxin of Plants125	SYNTAXIN OF PLANTS 125	Biochemical character	Os02g0209900		GO:0031201 - SNARE complex, GO:0005484 - SNAP receptor activity, GO:0000149 - SNARE binding, GO:0006887 - exocytosis, GO:0048278 - vesicle docking, GO:0006906 - vesicle fusion, GO:0012505 - endomembrane system, GO:0016021 - integral to membrane, GO:0006886 - intracellular protein transport, GO:0005886 - plasma membrane
PH	LOC_Os02g11920	2	6172371	6173788	-	49426202 , 49448424	hypothetical 20protein	nongenic	WS20
PH	LOC_Os02g11930	2	6183112	6187830	+	49426202 , 49448424	receptor-like 20protein 20kinase 20precursor 2C 20putative 2C 20expressed	nongenic	WS20
PH	LOC_Os02g12910	2	6815291	6818362	+	50096371,50138576	receptor-like 20protein 20kinase 205 20precursor 2C 20putative 2C 20expressed	nongenic	IGKV
PH	LOC_Os02g12930	2	6826610	6827182	+	50096371,50138576	expressed 20protein	nongenic	IGKV
PH	LOC_Os02g12970	2	6861021	6865151	-	50096371,50138576	retrotransposon 20protein 2C 20putative 2C 20Ty3-gypsy 20subclass 2C 20expressed	nongenic	IGKV
PH	LOC_Os02g12980	2	6877381	6882468	+	50096371,50138576	retrotransposon 20protein 2C 20putative 2C 20unclassified 2C 20expressed	nongenic	IGKV
PH	LOC_Os02g40270	2	24380891	24382673	-	67657118 , 67677546	expressed 20protein	nongenic	WS21
PH	LOC_Os02g40280	2	24390731	24396384	-	67657118 , 67677546	piwi 20domain 20containing 20protein 2C 20putative 2C 20expressed	nongenic	WS21
PH	LOC_Os02g40320	2	24403529	24408504	-	67657118 , 67677546	PINHEAD 2C 20putative 2C 20expressed	genic	WS21
PH	LOC_Os02g40340	2	24432051	24435197	-	67784735	expressed 20protein	QTN	IGKV_WS2020
PH, PL	LOC_Os02g40500	2	24566319	24568216	+	67784735, 67820962	OsGrx_C2.1 20- 20glutaredoxin 20subgroup 20I 2C 20expressed	QTN	IGKV_WS2020, ISAH_WS2020	GRX9	OsGRX9, OsGrx_C2.1, Grx_C2.1	GLUTAREDOXIN 9	glutaredoxin 9	GLUTAREDOXIN 9	Tolerance and resistance - Stress tolerance, Biochemical character	Os02g0618100		GO:0022900 - electron transport chain, GO:0009507 - chloroplast, GO:0015035 - protein disulfide oxidoreductase activity, GO:0046685 - response to arsenic, GO:0045454 - cell redox homeostasis, GO:0009055 - electron carrier activity	TO:0000465 - mineral and ion content related trait
PH, PL	LOC_Os02g40510	2	24569294	24572560	+	67784735, 67820962	response 20regulator 20receiver 20domain 20containing 20protein 2C 20expressed	QTN	IGKV_WS2020, ISAH_WS2020	TOC1	OsTOC1, OsPRR1, Os-PRR1, PRR1, OsRRA21, OsCCT07	TIMING OF CAB EXPRESSION 1	Two-component response regulator-like PRR1, Pseudo-response regulator 1, A-type RR 21, CCT domain-containing gene 7, CCT (CO, CO-LIKE and TOC1) domain protein 7, CCT domain protein 7	PSEUDO-RESPONSE REGULATOR 1	Tolerance and resistance - Disease resistance, Reproductive organ - Heading date, Heterochrony, Vegetative organ - Culm	Os02g0618200		GO:0045892 - negative regulation of transcription, DNA-dependent, GO:0007623 - circadian rhythm, GO:0042752 - regulation of circadian rhythm, GO:0000160 - two-component signal transduction system (phosphorelay), GO:0005634 - nucleus, GO:0006350 - transcription, GO:0031349 - positive regulation of defense response, GO:0048573 - photoperiodism, flowering, GO:0045893 - positive regulation of transcr…	TO:0000207 - plant height, TO:0000137 - days to heading, TO:0000112 - disease resistance, TO:0000329 - tillering ability, TO:0000346 - tiller number, TO:0002616 - flowering time	PO:0009089 - endosperm , PO:0009010 - seed , PO:0025034 - leaf , PO:0009009 - plant embryo , PO:0009049 - inflorescence , PO:0009006 - shoot system , PO:0000055 - bud
PH, PL	LOC_Os02g40514	2	24573390	24575344	-	67784735, 67820962	h 2FACA 20ribonucleoprotein 20complex 20subunit 203 2C 20putative 2C 20expressed	QTN	IGKV_WS2020, ISAH_WS2020
PH, PL	LOC_Os02g40520	2	24577977	24578396	+	67784735, 67820962	expressed 20protein	QTN	IGKV_WS2020, ISAH_WS2020
PH, PL	LOC_Os02g40530	2	24580382	24582527	-	67784735, 67820962	MYB 20family 20transcription 20factor 2C 20putative 2C 20expressed	QTN	IGKV_WS2020, ISAH_WS2020	MPS	OsMPS, Os2R_MYB25, 2R_MYB25	MULTIPASS	R2R3-MYB Transcription Factor 25	MULTIPASS	Coloration - Anthocyanin, Tolerance and resistance - Stress tolerance	Os02g0618400		GO:0031540 - regulation of anthocyanin biosynthetic process, GO:0003682 - chromatin binding, GO:0003677 - DNA binding
PH, PL	LOC_Os02g40540	2	24592336	24593477	-	67784735, 67820962	expressed 20protein	QTN	IGKV_WS2020, IGKV_WS2021, ISAH_WS2020
PH, PL	LOC_Os02g40550	2	24595175	24596968	+	67784735, 67820962	Lung 20seven 20transmembrane 20receptor 20domain 20containing 20protein 2C 20putative 2C 20expressed	QTN	IGKV_WS2020, IGKV_WS2021, ISAH_WS2020
PH, PL	LOC_Os02g40560	2	24597170	24597886	-	67784735, 67820962	expressed 20protein	QTN	IGKV_WS2020, IGKV_WS2021, ISAH_WS2020
PH	LOC_Os02g40570	2	24599772	24605729	+	67784735	retrotransposon 20protein 2C 20putative 2C 20Ty3-gypsy 20subclass 2C 20expressed	QTN	IGKV_WS2020, IGKV_WS2021
PH	LOC_Os02g40590	2	24624747	24625385	-	67963433	expressed 20protein	QTN	IGKV_WS2021
PH	LOC_Os02g40600	2	24627210	24627944	-	67963433	expressed 20protein	QTN	IGKV_WS2021
PH	LOC_Os02g40610	2	24628895	24631310	-	67963433	expressed 20protein	QTN	IGKV_WS2021
PH	LOC_Os02g40620	2	24631805	24632548	-	67963433	expressed 20protein	QTN	IGKV_WS2021
PH	LOC_Os02g40630	2	24635562	24635999	-	67963433	expressed 20protein	QTN	IGKV_WS2021
PH	LOC_Os02g40640	2	24641283	24641981	-	67963433	expressed 20protein	QTN	IGKV_WS2021
PH	LOC_Os02g40650	2	24643393	24644058	+	67963433	expressed 20protein	QTN	IGKV_WS2021
PH	LOC_Os02g40664	2	24645498	24651204	-	67963433	zinc 20finger 20family 20protein 2C 20putative 2C 20expressed	QTN	IGKV_WS2021	RFPH2-15	OsRFPH2-15, OsRING316, RING316, OsvWA6, vWA6	RING-H2 PROTEIN 15	RING finger protein OsRFPH2-15, RING-H2 protein 15, RING-type E3 ubiquitin ligase 316, von Willebrand factor A6	RING-H2 PROTEIN 15	Tolerance and resistance - Stress tolerance, Tolerance and resistance - Disease resistance	Os02g0619600		GO:0042742 - defense response to bacterium, GO:0008270 - zinc ion binding, GO:0010332 - response to gamma radiation, GO:0005886 - plasma membrane, GO:0050832 - defense response to fungus	TO:0000203 - bacterial leaf streak disease resistance, TO:0000255 - sheath blight disease resistance, TO:0000175 - bacterial blight disease resistance, TO:0000161 - radiation response trait, TO:0000074 - blast disease
PH	LOC_Os02g40680	2	24667251	24670792	+	67963433	mis12 20protein 2C 20expressed	QTN	IGKV_WS2021	MIS12	OsMIS12	MINICHROMOSOME INSTABILITY 12				Os02g0620100		GO:0005634 - nucleus, GO:0034501 - protein localization to kinetochore, GO:0000818 - nuclear MIS12/MIND type complex, GO:0051301 - cell division, GO:0000278 - mitotic cell cycle, GO:0000776 - kinetochore, GO:0051382 - kinetochore assembly, GO:0000070 - mitotic sister chromatid segregation
PH	LOC_Os02g40690	2	24671195	24671954	+	67963433	expressed 20protein	QTN	IGKV_WS2021
PH	LOC_Os02g40700	2	24676363	24677364	+	67963433	enzyme 20of 20the 20cupin 20superfamily 20protein 2C 20putative 2C 20expressed	QTN	IGKV_WS2021
PH	LOC_Os02g40710	2	24683633	24685205	+	67963433	ammonium 20transporter 20protein 2C 20putative 2C 20expressed	QTN	IGKV_WS2021	AMT1;3	OsAMT1;3, AMT1-3, Osamt1-2, \OsAMT1, 2\", OsAMT1;2, OsAMT1.3, AMT1.2"	AMMONIUM TRANSPORTER-1; 3	ammonium transporter-1;3, ammonium transporter 1;3, Ammonium transporter 1 member 3, ammonium transporter 1-2, \NH4+ transporter 1, 2\", Ammonium transporter 1;2"	AMMONIUM TRANSPORTER-1; 3	Tolerance and resistance - Stress tolerance, Biochemical character, Character as QTL - Yield and productivity	Os02g0620500		GO:0016021 - integral to membrane, GO:0060359 - response to ammonium ion, GO:0042594 - response to starvation, GO:0005886 - plasma membrane, GO:0046688 - response to copper ion, GO:0055085 - transmembrane transport, GO:0015696 - ammonium transport, GO:0008519 - ammonium transmembrane transporter activity, GO:0042128 - nitrate assimilation, GO:0015398 - high affinity secondary active ammonium tran…	TO:0000021 - copper sensitivity, TO:0000114 - flooding related trait, TO:0000598 - protein content, TO:0000396 - grain yield, TO:0000011 - nitrogen sensitivity	PO:0009005 - root , PO:0025034 - leaf
PH	LOC_Os02g40720	2	24686785	24687580	-	67963433	expressed 20protein	QTN	IGKV_WS2021
PH	LOC_Os02g40730	2	24690884	24692884	+	67963433	ammonium 20transporter 20protein 2C 20putative 2C 20expressed	QTN	IGKV_WS2021	AMT1;2	OsAMT1;2, AMT1-2, Osamt1-3, \OsAMT1, 3\", OsAMT1;3, OsAMT1.3, OsAMT1.2, AMT1.2"	AMMONIUM TRANSPORTER-1; 2	ammonium transporter-1;2, ammonium transporter 1;2, Ammonium transporter 1 member 2, ammonium transporter 1-3, \NH4+ transporter 1, 3\""	AMMONIUM TRANSPORTER-1; 2	Tolerance and resistance - Stress tolerance, Biochemical character	Os02g0620600		GO:0009413 - response to flooding, GO:0007584 - response to nutrient, GO:0005634 - nucleus, GO:0005886 - plasma membrane, GO:0015398 - high affinity secondary active ammonium transmembrane transporter activity, GO:0016021 - integral to membrane, GO:0055085 - transmembrane transport, GO:0009267 - cellular response to starvation, GO:0015696 - ammonium transport, GO:0016020 - membrane, GO:0051258 - …	TO:0000450 - grain yield per panicle, TO:0000114 - flooding related trait, TO:0000011 - nitrogen sensitivity	PO:0009005 - root
PH	LOC_Os02g40750	2	24696856	24698448	-	67963433	pentatricopeptide 20domain 20containing 20protein 2C 20putative 2C 20expressed	QTN	IGKV_WS2021
PH	LOC_Os02g40760	2	24700974	24701678	-	67963433	expressed 20protein	QTN	IGKV_WS2021
PH	LOC_Os02g40770	2	24707985	24717301	+	67963433	SET 20domain 20containing 20protein 2C 20expressed	QTN	IGKV_WS2021	_	OsSET10, SDG712	_	SET protein 10		Biochemical character	Os02g0621100		GO:0018024 - histone-lysine N-methyltransferase activity, GO:0008270 - zinc ion binding, GO:0005694 - chromosome, GO:0005634 - nucleus
PH	LOC_Os02g44980	2	27244828	27246981	+	70591401	transmembrane 20amino 20acid 20transporter 20protein 2C 20putative 2C 20expressed	QTN	ISAH_WS2021	_	OsANT3	_	aromatic and neutral amino acid transporter 3		Biochemical character	Os02g0670900		GO:0016021 - integral to membrane
PH	LOC_Os02g44990	2	27248697	27251470	+	70591401	OsFBDUF13 20- 20F-box 20and 20DUF 20domain 20containing 20protein 2C 20expressed	QTN	ISAH_WS2021	_	MAIF1, OsFbox104, Os_F0528, OsFBDUF13, FBDUF13	_	miRNAs regulated and abiotic stress induced F-box gene 1, F-box protein 104, F-box-type E3 ubiquitin ligase FBDUF13		Vegetative organ - Root, Tolerance and resistance - Stress tolerance	Os02g0671100
PH	LOC_Os02g45000	2	27261970	27263595	+	70591401	expressed 20protein	QTN	ISAH_WS2021	_	Os_F0676	_				Os02g0671200
PH	LOC_Os02g45010	2	27265867	27269207	-	70591401	ethylene-responsive 20protein 20related 2C 20putative 2C 20expressed	QTN	ISAH_WS2021	_	OsbHLH076	_	basic helix-loop-helix protein 076			Os02g0671300
PH	LOC_Os02g45040	2	27296970	27300115	-	70591401	retrotransposon 20protein 2C 20putative 2C 20unclassified 2C 20expressed	QTN	ISAH_WS2021
PH	LOC_Os02g45054	2	27316020	27325663	+	70591401	ZOS2-15 20- 20C2H2 20zinc 20finger 20protein 2C 20expressed	QTN	ISAH_WS2021	IDD4	OsIDD4, SID1	INDETERMINATE DOMAIN 4	indeterminate domain 4, Suppressor of rid1	_	Reproductive organ - Heading date	Os02g0672100		GO:0046872 - metal ion binding, GO:0048573 - photoperiodism, flowering, GO:0003676 - nucleic acid binding, GO:0048510 - regulation of timing of transition from vegetative to reproductive phase	TO:0000137 - days to heading, TO:0002616 - flowering time
PH	LOC_Os02g45070	2	27330144	27341836	-	70591401	PINHEAD 2C 20putative 2C 20expressed	QTN	ISAH_WS2021	AGO1A	OsAGO1a, AGO1a, AGO10, AGO1-1	ARGONAUTE 1A	Protein argonaute 1A, Argonaute 10	PROTEIN ARGONAUTE 1A	Vegetative organ - Shoot apical meristem(SAM), Other	Os02g0672200		GO:0031047 - gene silencing by RNA, GO:0003676 - nucleic acid binding	TO:0006020 - shoot apical meristem development
PH	LOC_Os02g45080	2	27347403	27350221	+	70591401	MYB 20family 20transcription 20factor 2C 20putative 2C 20expressed	QTN	ISAH_WS2021
PH	LOC_Os02g45100	2	27357584	27359660	-	70591401	mitochondrial 20import 20inner 20membrane 20translocase 20subunit 20Tim17 2C 20putative 2C 20expressed	QTN	ISAH_WS2021	TIM23	Tim23, OsTim23	TRANSLOCASE INNER MEMBRANE SUBUNIT 23	mitochondrial import inner membrane translocase Tim23	TRANSLOCASE INNER MEMBRANE SUBUNIT 23		Os02g0672500		GO:0022857 - transmembrane transporter activity, GO:0016020 - membrane, GO:0005744 - mitochondrial inner membrane presequence translocase complex, GO:0008320 - protein transmembrane transporter activity, GO:0030150 - protein import into mitochondrial matrix
PH	LOC_Os02g45110	2	27360417	27365800	+	70591401	MT-A70 20domain 20containing 20protein 2C 20expressed	QTN	ISAH_WS2021	MTA2	OsMTA2, OsIME4, IME4	MRNA ADENOSINE METHYLASE 2	mRNA adenosine methylase 2, inducer of meiosis 4, OsIME4 sense transcript	MRNA ADENOSINE METHYLASE 2	Seed - Morphological traits - Embryo, Biochemical character, Reproductive organ - Pollination, fertilization, fertility - Meiosis, Reproductive organ - Pollination, fertilization, fertility - Sterility	Os02g0672600		GO:0005634 - nucleus, GO:0003723 - RNA binding, GO:0016607 - nuclear speck, GO:0009555 - pollen development, GO:0000278 - mitotic cell cycle, GO:0001100 - negative regulation of exit from mitosis, GO:0009507 - chloroplast, GO:0080009 - mRNA methylation, GO:0009793 - embryonic development ending in seed dormancy, GO:0001510 - RNA methylation, GO:0045995 - regulation of embryonic development, GO:00…	TO:0000730 - mitotic cell cycle trait, TO:0000620 - embryo development trait, TO:0000040 - panicle length, TO:0000180 - spikelet fertility, TO:0000392 - sterility or fertility trait, TO:0000357 - growth and development trait	PO:0009066 - anther , PO:0020003 - plant ovule , PO:0007631 - plant embryo stage , PO:0001007 - pollen development stage
PH	LOC_Os02g45120	2	27369109	27371822	+	70591401	expressed 20protein	QTN	ISAH_WS2021
PH	LOC_Os02g45140	2	27377950	27379665	-	70591401	expressed 20protein	QTN	ISAH_WS2021
PH	LOC_Os02g45160	2	27390847	27394188	-	70591401	aluminum-activated 20malate 20transporter 2C 20putative 2C 20expressed	QTN	ISAH_WS2021	PAAB1-1	OsALMT7, ALMT7	PANICLE APICAL ABORTION 1-1	Aluminum-activated malate transporter 7, panicle apical abortion1-1	ALUMINUM-ACTIVATED MALATE TRANSPORTER 7	Character as QTL - Yield and productivity, Reproductive organ - panicle, Biochemical character	Os02g0673100		GO:0012501 - programmed cell death, GO:0015743 - malate transport, GO:0005886 - plasma membrane, GO:0006309 - DNA fragmentation involved in apoptosis, GO:0010229 - inflorescence development, GO:0009705 - plant-type vacuole membrane, GO:0016021 - integral to membrane, GO:0015140 - malate transmembrane transporter activity	TO:0000447 - filled grain number, TO:0000397 - grain size, TO:0000590 - grain weight, TO:0000605 - hydrogen peroxide content, TO:0000657 - spikelet anatomy and morphology trait, TO:0000621 - inflorescence development trait, TO:0000207 - plant height, TO:0006032 - panicle size, TO:0000040 - panicle length, TO:0000396 - grain yield	PO:0005028 - inflorescence vascular system , PO:0009005 - root , PO:0009015 - portion of vascular tissue , PO:0001083 - inflorescence development stage
PH	LOC_Os02g45170	2	27416526	27421961	+	70591401	helix-loop-helix 20DNA-binding 20protein 2C 20putative 2C 20expressed	QTN	ISAH_WS2021	LHW	OsLHW	LONESOME HIGHWAY			Vegetative organ - Root, Tolerance and resistance - Stress tolerance	Os02g0673500		GO:0003700 - transcription factor activity, GO:0009414 - response to water deprivation, GO:0090058 - metaxylem development, GO:0046983 - protein dimerization activity	TO:0000470 - vascular tissue related trait, TO:0000276 - drought tolerance	PO:0020124 - root stele
PH	LOC_Os02g45900	2	27970104	27972033	-	71243623	tRNA-splicing 20endonuclease 20positive 20effector-related 2C 20putative 2C 20expressed	nongenic	WS21
PH	LOC_Os02g45910	2	27977587	27979810	-	71243623	tRNA-splicing 20endonuclease 20positive 20effector-related 2C 20putative 2C 20expressed	nongenic	WS21	DNA2_15	OsDNA2_15	DNA REPLICATION HELICASE/NUCLEASE 2_15	DNA Replication Helicase/Nuclease2_15, DNA replication helicase 2_15	DNA REPLICATION HELICASE/NUCLEASE 2_15	Tolerance and resistance - Stress tolerance	Os02g0684150		GO:0009414 - response to water deprivation, GO:0003723 - RNA binding, GO:0009651 - response to salt stress, GO:0004386 - helicase activity	TO:0000276 - drought tolerance, TO:0006001 - salt tolerance
PH	LOC_Os03g06830	3	3462821	3463090	-	82669735 , 82670689	expressed 20protein	nongenic	WS20
PH	LOC_Os03g11900	3	6232979	6238297	-	85450105 , 85462902	transporter 20family 20protein 2C 20putative 2C 20expressed	nongenic	WS20	MST4	OsMST4, OsSTP4, STP4	MONOSACCHARIDE TRANSPORTER 4	monosaccharide transporter 4, Sugar Transport Protein 4, STP protein 4, monosaccharide transporter STP4	MONOSACCHARIDE TRANSPORTER 4	Biochemical character, Tolerance and resistance - Stress tolerance	Os03g0218400		GO:0009749 - response to glucose stimulus, GO:0009737 - response to abscisic acid stimulus, GO:0016021 - integral to membrane, GO:0022891 - substrate-specific transmembrane transporter activity, GO:0009414 - response to water deprivation, GO:0005358 - high-affinity hydrogen:glucose symporter activity, GO:0009744 - response to sucrose stimulus, GO:0005886 - plasma membrane, GO:0006970 - response t…	TO:0000095 - osmotic response sensitivity, TO:0000238 - growth media composition sensitivity, TO:0006001 - salt tolerance, TO:0000276 - drought tolerance
PH	LOC_Os03g11910	3	6243990	6247317	-	85450105 , 85462902	DnaK 20family 20protein 2C 20putative 2C 20expressed	nongenic	WS20
PH	LOC_Os03g11930	3	6250429	6251724	-	85450105 , 85462902	expressed 20protein	nongenic	WS20
PH	LOC_Os03g11950	3	6264770	6267879	+	85450105 , 85462902	SEC14 20cytosolic 20factor 20family 20protein 2C 20putative 2C 20expressed	nongenic	WS20	SEC14-26	OsSec14-26, Sec14-26	SEC14 DOMAIN PROTEIN 26	SEC14 domain protein 26, Sec14 protein 26	SEC14 DOMAIN PROTEIN 26	Biochemical character, Tolerance and resistance - Disease resistance	Os03g0219100		GO:0016020 - membrane, GO:0050832 - defense response to fungus	TO:0000074 - blast disease
PH	LOC_Os03g25490	3	14559322	14561845	+	93771035 , 93773064	cytochrome 20P450 2072A1 2C 20putative 2C 20expressed	nongenic	WS21	_	OsSTA101	_			Reproductive organ - Spikelet, flower, glume, awn	Os03g0371000				PO:0009066 - anther
PH	LOC_Os03g25500	3	14567492	14571763	+	93771035 , 93773064	cytochrome 20P450 2072A1 2C 20putative 2C 20expressed	nongenic	WS21	CYP72A1	CYP72A1	P-450 72A1	Cytochrome P450 72A1	CYTOCHROME P450 72A1	Biochemical character, Tolerance and resistance - Stress tolerance	Os03g0371300		GO:0020037 - heme binding, GO:0005506 - iron ion binding, GO:0016705 - oxidoreductase activity, acting on paired donors, with incorporation or reduction of molecular oxygen, GO:0009651 - response to salt stress	TO:0006001 - salt tolerance
PH	LOC_Os03g39210	3	21775331	21779400	-	100989672	retrotransposon 20protein 2C 20putative 2C 20unclassified 2C 20expressed	nongenic	ISAH
PH	LOC_Os03g39220	3	21782182	21783161	-	100989672	expressed 20protein	nongenic	ISAH
PH	LOC_Os04g04914	4	2367636	2372259	+	118088313	retrotransposon 20protein 2C 20putative 2C 20unclassified 2C 20expressed	QTN	ISAH_WS2020
PH	LOC_Os04g04950	4	2390278	2398419	-	118088313	copper 20methylamine 20oxidase 20precursor 2C 20putative 2C 20expressed	QTN	ISAH_WS2020	DAO3	OsDAO3, OsCuDAO3, CuDAO3	DIAMINE OXIDASE 3	diamine oxidase 3, Copper-containing diamine oxidase 3	DIAMINE OXIDASE 3	Biochemical character, Tolerance and resistance - Stress tolerance	Os04g0136200		GO:0009651 - response to salt stress, GO:0048038 - quinone binding, GO:0006598 - polyamine catabolic process, GO:0008131 - amine oxidase activity, GO:0009308 - amine metabolic process, GO:0005507 - copper ion binding	TO:0006001 - salt tolerance
PH	LOC_Os04g04970	4	2408025	2409055	+	118088313	expressed 20protein	QTN	ISAH_WS2020
PH	LOC_Os04g04980	4	2413801	2415039	+	118088313	pyridoxal-dependent 20decarboxylase 20protein 2C 20putative 2C 20expressed	QTN	ISAH_WS2020	ODC2	OsODC2	ORNITHINE DECARBOXYLASE 2	ornithine decarboxylase 2	ORNITHINE DECARBOXYLASE 2	Biochemical character, Tolerance and resistance - Stress tolerance	Os04g0136500		GO:0003824 - catalytic activity, GO:0033387 - putrescine biosynthetic process from ornithine, GO:0009651 - response to salt stress, GO:0005737 - cytoplasm, GO:0006596 - polyamine biosynthetic process, GO:0004586 - ornithine decarboxylase activity	TO:0006001 - salt tolerance
PH	LOC_Os04g05010	4	2426736	2429504	-	118088313	CBS 20domain 20containing 20membrane 20protein 2C 20putative 2C 20expressed	QTN	ISAH_WS2020	CBSX5	OsCBSX5	_	cystathionine b-synthase domain containing protein OsCBSX5, CBS domain containing protein OsCBSX5, cystathionine beta-synthase X5	_	Biochemical character, Tolerance and resistance - Stress tolerance	Os04g0136700		GO:0008152 - metabolic process, GO:0009970 - cellular response to sulfate starvation, GO:0042594 - response to starvation, GO:0009408 - response to heat, GO:0003824 - catalytic activity	TO:0000259 - heat tolerance, TO:0000007 - sulfur sensitivity
PH	LOC_Os04g05030	4	2441510	2447788	+	118088313	serine-rich 2025 20kDa 20antigen 20protein 2C 20putative 2C 20expressed	QTN	ISAH_WS2020
PH	LOC_Os04g05040	4	2448851	2451024	-	118088313	transposon 20protein 2C 20putative 2C 20unclassified 2C 20expressed	nongenic	WS20
PH	LOC_Os04g05050	4	2480533	2485914	+	118088313	pectate 20lyase 20precursor 2C 20putative 2C 20expressed	QTN, nongenic	ISAH_WS2020, WS20	_	OsPLL4, PLL4, OsPLL4.1, OsPLL4.2	_	Pectate lyase-like 4		Biochemical character, Reproductive organ - Pollination, fertilization, fertility - Male sterility	Os04g0137201		GO:0009555 - pollen development, GO:0010152 - pollen maturation	TO:0000437 - male sterility	PO:0009073 - stigma , PO:0001007 - pollen development stage
PH	LOC_Os04g05060	4	2493571	2495303	+	118088313	cytochrome 20P450 2094A1 2C 20putative 2C 20expressed	QTN	ISAH_WS2020
PH	LOC_Os04g05070	4	2501625	2502817	-	118088313	expressed 20protein	QTN	ISAH_WS2020
PH	LOC_Os04g05080	4	2511483	2514711	+	118088313	vacuolar 20ATP 20synthase 20subunit 20F 2C 20putative 2C 20expressed	QTN	ISAH_WS2020
PH	LOC_Os04g05090	4	2520696	2522771	+	118088313	expressed 20protein	QTN	ISAH_WS2020
PH	LOC_Os04g05104	4	2523883	2535289	-	118088313	retrotransposon 20protein 2C 20putative 2C 20unclassified 2C 20expressed	QTN	ISAH_WS2020
PH	LOC_Os04g08340	4	4452696	4455350	+	120176543	OsSigP3 20- 20Putative 20Type 20I 20Signal 20Peptidase 20homologue 3B 20employs 20a 20putative 20Ser 2FLys 20catalytic 20dyad 2C 20expressed	QTN	ISAH_WS2021	_	OsSigP3, SIGP3	_	Type I Signal Peptidase 3, TYPE I SIGNAL PEPTIDASE 3		Biochemical character	Os04g0165600		GO:0008236 - serine-type peptidase activity, GO:0016021 - integral to membrane
PH	LOC_Os04g08350	4	4457400	4461845	-	120176543	cysteine 20synthase 2C 20chloroplast 2Fchromoplast 20precursor 2C 20putative 2C 20expressed	QTN	ISAH_WS2021	CAS	OsCAS, OAS-TL	BETA-CYANOALANINE SYNTHASE	beta-cyanoalanine synthase, O-acetylserine (thiol) lyase	BETA-CYANOALANINE SYNTHASE	Biochemical character, Tolerance and resistance - Disease resistance, Tolerance and resistance - Stress tolerance, Tolerance and resistance	Os04g0165700		GO:0009750 - response to fructose stimulus, GO:0046686 - response to cadmium ion, GO:0042744 - hydrogen peroxide catabolic process, GO:0032880 - regulation of protein localization, GO:0030170 - pyridoxal phosphate binding, GO:0019761 - glucosinolate biosynthetic process, GO:0019500 - cyanide catabolic process, GO:0019288 - isopentenyl diphosphate biosynthetic process, mevalonate-independent pathw…	TO:0000007 - sulfur sensitivity, TO:0000175 - bacterial blight disease resistance, TO:0000237 - water stress trait
PH	LOC_Os04g08360	4	4463046	4463552	+	120176543	expressed 20protein	QTN	ISAH_WS2021
PH	LOC_Os04g08370	4	4470642	4473512	-	120176543	Leucine 20Rich 20Repeat 20family 20protein 2C 20expressed	QTN	ISAH_WS2021
PH	LOC_Os04g08390	4	4484997	4490101	-	120176543	Leucine 20Rich 20Repeat 20family 20protein 2C 20expressed	QTN	ISAH_WS2021	BPH40	Bph40, OsBPH40	BROWN PLANTHOPPER RESISTANCE 40			Tolerance and resistance - Insect resistance	Os04g0166000		GO:0002213 - defense response to insect, GO:0009664 - plant-type cell wall organization	TO:0000424 - brown planthopper resistance
PH	LOC_Os04g08400	4	4497789	4503741	+	120176543	retrotransposon 20protein 2C 20putative 2C 20unclassified 2C 20expressed	QTN	ISAH_WS2021
PH	LOC_Os04g08410	4	4508804	4513883	-	120176543	ELM2 20domain 20containing 20protein 2C 20putative 2C 20expressed	QTN	ISAH_WS2021
PH	LOC_Os04g08415	4	4520759	4521524	-	120176543	expressed 20protein	QTN	ISAH_WS2021
PH	LOC_Os04g08450	4	4543617	4547560	+	120176543	expressed 20protein	QTN	ISAH_WS2021	SFL1	OsSFL1	SAP30 FUNCTIONAL LIKE 1	SAP30 Functional Like 1	SAP30 FUNCTIONAL LIKE 1	Reproductive organ - Heading date	Os04g0166600		GO:0006355 - regulation of transcription, DNA-dependent, GO:0004407 - histone deacetylase activity, GO:0000118 - histone deacetylase complex, GO:0048577 - negative regulation of short-day photoperiodism, flowering	TO:0002616 - flowering time, TO:0000137 - days to heading
PH	LOC_Os04g08460	4	4557188	4559281	+	120176543	OsFBX115 20- 20F-box 20domain 20containing 20protein 2C 20expressed	QTN	ISAH_WS2021	_	OsFbox180, Os_F0342	_	F-box protein 180
PH	LOC_Os04g08470	4	4564403	4571423	-	120176543	OsFBX116 20- 20F-box 20domain 20containing 20protein 2C 20expressed	QTN	ISAH_WS2021	_	Os_F0798	_
PH	LOC_Os04g08480	4	4574482	4579567	-	120176543	transposon 20protein 2C 20putative 2C 20CACTA 2C 20En 2FSpm 20sub-class 2C 20expressed	QTN	ISAH_WS2021
PH	LOC_Os04g08500	4	4591307	4592383	+	120176543	conserved 20hypothetical 20protein	QTN	ISAH_WS2021
PH	LOC_Os04g08510	4	4597987	4599183	-	120176543	OsFBX117 20- 20F-box 20domain 20containing 20protein 2C 20expressed	QTN	ISAH_WS2021	_	OsFbox181, Os_F0655, OsFBX117, FBX117	_	F-box protein 181, F-box-type E3 ubiquitin ligase X117			Os04g0167600
PH	LOC_Os04g08520	4	4608252	4611232	-	120176543	retrotransposon 20protein 2C 20putative 2C 20Ty1-copia 20subclass 2C 20expressed	QTN	ISAH_WS2021
PH	LOC_Os04g08550	4	4637978	4640929	-	120176543	oxidoreductase 2C 20aldo 2Fketo 20reductase 20family 20protein 2C 20putative 2C 20expressed	QTN	ISAH_WS2021	_	OsAKR5, AKR5	_	Group 5 Aldo-Keto Reductase		Biochemical character	Os04g0167800		GO:0004032 - aldehyde reductase activity, GO:0005829 - cytosol, GO:0016491 - oxidoreductase activity
PH	LOC_Os04g08570	4	4651469	4652730	-	120176543	uncharacterized 20PE-PGRS 20family 20protein 20PE_PGRS20 2C 20putative 2C 20expressed	QTN, nongenic	ISAH_WS2021, WS20
PH	LOC_Os04g08580	4	4664797	4668349	-	120289917 , 120278508	retrotransposon 20protein 2C 20putative 2C 20Ty1-copia 20subclass 2C 20expressed	genic	WS20
PH	LOC_Os04g08640	4	4690898	4692354	+	120289917 , 120316082	cadmium 20tolerance 20factor 2C 20putative 2C 20expressed	nongenic	WS20
PH	LOC_Os04g08650	4	4695714	4696734	+	120289917 , 120316082	expressed 20protein	nongenic	WS20
PH	LOC_Os04g52910	4	31519243	31519899	-	147145377 , 147143588	hypothetical 20protein	nongenic	WS20
PH	LOC_Os04g52920	4	31524614	31527861	+	147145377 , 147143588	remorin 20family 20protein 2C 20putative 2C 20expressed	nongenic	WS20	GSD1	OsREM6.6, REM6.6, OsGSD1	GRAIN SETTING DEFECT1	Grain setting defect1, Grain setting defect 1, Remorin 6.6, remorin group 6 member 6, remorin family protein GSD1	REMORIN 6.6	Character as QTL - Yield and productivity, Seed - Physiological traits - Storage substances, Seed - Morphological traits	Os04g0620200		GO:0008643 - carbohydrate transport, GO:0010497 - plasmodesmata-mediated intercellular transport, GO:0009506 - plasmodesma, GO:0010431 - seed maturation, GO:0005886 - plasma membrane	TO:0006005 - fructose content, TO:0002661 - seed maturation, TO:0000291 - carbohydrate content, TO:0000333 - sugar content, TO:0000382 - 1000-seed weight, TO:0000399 - grain thickness, TO:0000696 - starch content, TO:0000328 - sucrose content, TO:0000300 - glucose content	PO:0000071 - companion cell , PO:0007632 - seed maturation stage
PH	LOC_Os04g59370	4	35287781	35289156	+	150947678 , 150916132	thaumatin 2C 20putative 2C 20expressed	nongenic	WS21	_	OsPR5, PR5	_	pathogenesis-related gene 5		Tolerance and resistance - Stress tolerance	Os04g0689900		GO:0009414 - response to water deprivation, GO:0009845 - seed germination	TO:0000276 - drought tolerance	PO:0007057 - 0 seed germination stage
PH	LOC_Os04g59380	4	35297598	35300349	+	150947678 , 150916132	ZOS4-14 20- 20C2H2 20zinc 20finger 20protein 2C 20expressed	nongenic	WS21	TIF2	OsTIF2	TAA1 TRANSCRIPTIONAL INHIBITION FACTOR 2	TAA1 transcriptional inhibition factor 2	TAA1 TRANSCRIPTIONAL INHIBITION FACTOR 2		Os04g0690100
PH	LOC_Os04g59400	4	35317094	35324442	+	150947678 , 150916132	expressed 20protein	nongenic	WS21
PH	LOC_Os04g59420	4	35327019	35328615	+	150947678 , 150916132	expressed 20protein	nongenic	WS21	SRDP	OsSRDP	STRESS RESPONSIVE DUF740 PROTEIN	Stress Responsive DUF740 Protein	STRESS RESPONSIVE DUF740 PROTEIN	Tolerance and resistance - Disease resistance, Tolerance and resistance - Stress tolerance	Os04g0690500		GO:0009651 - response to salt stress, GO:0009409 - response to cold, GO:0030104 - water homeostasis, GO:0009414 - response to water deprivation, GO:0050832 - defense response to fungus	TO:0000136 - relative water content, TO:0000303 - cold tolerance, TO:0006001 - salt tolerance, TO:0000276 - drought tolerance, TO:0000074 - blast disease, TO:0000605 - hydrogen peroxide content, TO:0002662 - leaf rolling tolerance, TO:0000636 - relative shoot dry weight, TO:0006002 - proline content, TO:0001016 - relative chlorophyll content
PH	LOC_Os05g02340	5	752426	757003	-	151877274	retrotransposon 20protein 2C 20putative 2C 20Ty3-gypsy 20subclass 2C 20expressed	genic	WS21
PH	LOC_Os05g09470	5	5319265	5321928	-	156448595	hypothetical 20protein	nongenic	WS21
PH	LOC_Os05g09480	5	5329581	5331490	+	156448595	OsIAA16 20- 20Auxin-responsive 20Aux 2FIAA 20gene 20family 20member 2C 20expressed	nongenic	WS21	IAA16	OsIAA16, DLN134, OsDLN134	AUX/IAA PROTEIN 16	Aux/IAA protein 16, DLN repressor 134, DLN motif protein 134	AUX/IAA PROTEIN 16		Os05g0186900		GO:0009733 - response to auxin stimulus, GO:0006355 - regulation of transcription, DNA-dependent, GO:0009734 - auxin mediated signaling pathway, GO:0005634 - nucleus, GO:0006351 - transcription, DNA-dependent
PH	LOC_Os05g27350	5	15894885	15896386	-	167032564 , 167045532	expressed 20protein	nongenic	WS20
PH	LOC_Os05g27360	5	15908771	15909256	+	167032564 , 167045532	expressed 20protein	nongenic	WS20
PH	LOC_Os05g27380	5	15919801	15920442	-	167032564 , 167045532	hypothetical 20protein	nongenic	WS20
PH	LOC_Os05g27390	5	15920989	15922545	+	167032564 , 167045532	retrotransposon 20protein 2C 20putative 2C 20unclassified	nongenic	WS20
PH	LOC_Os06g02400	6	825521	829063	+	181910900 , 181937288	OsFBO18 20- 20F-box 20and 20other 20domain 20containing 20protein 2C 20expressed	genic	WS21	_	OsFbox289, Os_F0510, OsFBO18, FBO18	_	F-box protein 289, F-box-type E3 ubiquitin ligase O18			Os06g0114300
PH	LOC_Os06g02470	6	854044	854353	+	181937288,181945685	ATOZI1 2C 20putative 2C 20expressed	genic	ISAH, WS21
PH	LOC_Os06g02480	6	855810	858004	-	181937288,181941162	expressed 20protein	nongenic	ISAH	MHZ3		MAOHUZI 3	maohuzi3			Os06g0115200		GO:0009723 - response to ethylene stimulus, GO:0005783 - endoplasmic reticulum, GO:0016021 - integral to membrane, GO:0010104 - regulation of ethylene mediated signaling pathway, GO:0031397 - negative regulation of protein ubiquitination	TO:0000173 - ethylene sensitivity
PH	LOC_Os06g02490	6	860905	862569	-	181937288,181945685	acyl 20CoA 20binding 20protein 2C 20putative 2C 20expressed	genic	ISAH	ACBP2	OsACBP2	ACYL-COA-BINDING PROTEIN 2	Acyl-CoA-binding protein 2	ACYL-COA-BINDING PROTEIN 2	Character as QTL - Germination, Biochemical character, Seed - Morphological traits - Grain shape, Tolerance and resistance - Disease resistance, Tolerance and resistance - Stress tolerance, Seed - Physiological traits - Storage substances	Os06g0115300		GO:0009611 - response to wounding, GO:0048316 - seed development, GO:0050832 - defense response to fungus, GO:0000062 - acyl-CoA binding, GO:0005829 - cytosol, GO:0009409 - response to cold, GO:0008289 - lipid binding, GO:0009845 - seed germination	TO:0000491 - fat and essential oil composition related trait, TO:0000074 - blast disease, TO:0000303 - cold tolerance, TO:0000653 - seed development trait, TO:0000397 - grain size, TO:0000146 - seed length, TO:0000149 - seed width, TO:0000181 - seed weight, TO:0000396 - grain yield, TO:0000430 - germination rate, TO:0000488 - seed composition based quality trait, TO:0000590 - grain weight	PO:0025034 - leaf , PO:0009010 - seed , PO:0009089 - endosperm , PO:0009009 - plant embryo , PO:0007057 - 0 seed germination stage , PO:0001170 - seed development stage , PO:0007010 - whole plant fruit ripening stage
PH	LOC_Os06g02590	6	913779	921282	+	182001342 , 182049047	DUF1336 20domain 20containing 20protein 2C 20expressed	genic	WS20
PH	LOC_Os06g02610	6	925432	926153	-	182009469 , 182049047	folic 20acid 20binding 20protein 2C 20putative 2C 20expressed	nongenic	WS20
PH	LOC_Os06g02620	6	927338	932583	-	182009469 , 182049047	chaperone 20protein 20dnaJ 2C 20putative 2C 20expressed	nongenic	WS20	DJA9	OsDjA9, DjA9	DNAJ DOMAIN PROTEIN A9	DnaJ domain protein A9	DNAJ DOMAIN PROTEIN A9	Tolerance and resistance - Stress tolerance, Tolerance and resistance - Disease resistance	Os06g0116800		GO:0060267 - positive regulation of respiratory burst, GO:0051085 - chaperone mediated protein folding requiring cofactor, GO:0046872 - metal ion binding, GO:0009408 - response to heat, GO:0005783 - endoplasmic reticulum, GO:0005524 - ATP binding, GO:0010197 - polar nucleus fusion, GO:0050832 - defense response to fungus, GO:0010198 - synergid death, GO:0000740 - nuclear membrane fusion, GO:00057…	TO:0000074 - blast disease
PH	LOC_Os06g02690	6	963220	963905	-	182001342 , 182049047	expressed 20protein	nongenic	WS20
PH	LOC_Os06g02700	6	966650	970608	-	182001342 , 182049047	retrotransposon 20protein 2C 20putative 2C 20Ty3-gypsy 20subclass 2C 20expressed	nongenic	WS20
PH	LOC_Os06g49890	6	30202970	30207141	-	211290581	coiled-coil 20domain-containing 20protein 2090A 2C 20mitochondrial 20precursor 2C 20putative 2C 20expressed	nongenic	WS20
PH	LOC_Os06g49900	6	30209774	30211219	-	211290581	retrotransposon 20protein 2C 20putative 2C 20unclassified 2C 20expressed	nongenic	WS20
PH, PL	LOC_Os07g29700	7	17454047	17455243	-	229793512,229799929, 229823303,229785641	expressed 20protein	nongenic	ISARC
PH	LOC_Os07g29710	7	17462394	17462642	+	229793512,229799929	expressed 20protein	nongenic	ISARC, WS20
PH	LOC_Os07g29720	7	17471134	17472072	-	229793512,229799929	expressed 20protein	nongenic	ISARC, WS20
PH	LOC_Os08g01140	8	95765	97042	-	242167214,242128773	cytochrome 20b561 2C 20putative 2C 20expressed	nongenic	IGKV, WS20
PH	LOC_Os08g01150	8	102127	107380	+	242167214,242128773	DTA2 2C 20putative 2C 20expressed	nongenic	IGKV, WS20
PH	LOC_Os08g01180	8	115025	121121	-	242167214,242128773	nicalin 2C 20putative 2C 20expressed	nongenic	IGKV
PH	LOC_Os08g01190	8	138247	139410	+	242167214,242128773	ATOFP18 2FOFP18 2C 20putative 2C 20expressed	nongenic	IGKV	_	OsOFP28, OsOFP25	_	OVATE family protein 28, ovate family protein 25, OVATE-domain containing protein 25			Os08g0102400		GO:0005634 - nucleus		PO:0005052 - plant callus
PH	LOC_Os08g01200	8	141997	144225	-	242176935 , 242128773	retrotransposon 20protein 2C 20putative 2C 20unclassified 2C 20expressed	nongenic	WS20
PH	LOC_Os08g01210	8	147889	148455	-	242176935 , 242128773	harpin-induced 20protein 201 20domain 20containing 20protein 2C 20expressed	nongenic	WS20
PH	LOC_Os08g01360	8	228213	232453	+	242304606 , 242261673	RING 20finger 20protein 2013 2C 20putative 2C 20expressed	genic	WS20	_	OsRMR2, OsRING252, RING252	_	receptor homology region-transmembrane domain-RING-H2 (RMR) protein 2, ReMembR-H2 Protein 2, RING-type E3 ubiquitin ligase 252		Seed - Physiological traits - Storage substances, Biochemical character	Os08g0104300		GO:0016021 - integral to membrane, GO:0031902 - late endosome membrane, GO:0032586 - protein storage vacuole membrane, GO:0015031 - protein transport, GO:0008270 - zinc ion binding	TO:0002653 - endosperm storage protein content
PH	LOC_Os08g01420	8	272854	276978	-	242304606 , 242261673	PHD-finger 20domain 20containing 20protein 2C 20putative 2C 20expressed	genic	WS20	EHD3	Ehd3, OsPHD36, PHD36	EARLY HEADING DATE 3	Early heading date3, PHD transcription factor, Plant homeo-domain finger protein 36, PHD finger protein 36	PHD FINGER PROTEIN 36	Reproductive organ - Heading date	Os08g0105000		GO:0009648 - photoperiodism, GO:0008270 - zinc ion binding, GO:0009908 - flower development	TO:0002616 - flowering time
PH	LOC_Os08g27460	8	16757874	16766005	+	258788309 , 258818652	transposon 20protein 2C 20putative 2C 20CACTA 2C 20En 2FSpm 20sub-class 2C 20expressed	genic	WS21
PH	LOC_Os08g27500	8	16783382	16785811	-	258788309 , 258818652	retrotransposon 20protein 2C 20putative 2C 20Ty1-copia 20subclass 2C 20expressed	nongenic	WS21
PH	LOC_Os08g27520	8	16791152	16792822	-	258788309 , 258818652	retrotransposon 20protein 2C 20putative 2C 20unclassified 2C 20expressed	nongenic	WS21
PH	LOC_Os08g29600	8	18161058	18161614	-	260243012 , 260194392	seed 20maturation 20protein 20PM41 2C 20putative 2C 20expressed	nongenic	WS20
PH	LOC_Os08g29610	8	18165472	18166848	+	260243012 , 260194392	expressed 20protein	nongenic	WS20
PH	LOC_Os08g29640	8	18184603	18185478	+	260216622 , 260194392	expressed 20protein	nongenic	WS20
PH	LOC_Os08g29650	8	18189406	18195742	+	260243012 , 260194392	RNA 20recognition 20motif 20containing 20protein 2C 20expressed	nongenic	WS20
PH	LOC_Os08g29660	8	18220041	18222408	+	260243012 , 260194392	WRKY69 2C 20expressed	nongenic	WS20	WRKY69	OsWRKY69	WRKY GENE 69	Rice WRKY gene69	TRANSCRIPTION FACTOR WRKY69	Tolerance and resistance - Stress tolerance, Tolerance and resistance - Disease resistance, Vegetative organ - Leaf, Tolerance and resistance - Insect resistance	Os08g0386200		GO:0006952 - defense response, GO:0002213 - defense response to insect, GO:0009409 - response to cold, GO:0010150 - leaf senescence, GO:0043565 - sequence-specific DNA binding, GO:0007568 - aging, GO:0042742 - defense response to bacterium, GO:0003700 - transcription factor activity, GO:0050832 - defense response to fungus	TO:0000303 - cold tolerance, TO:0000205 - white-backed planthopper resistance, TO:0000074 - blast disease, TO:0000249 - leaf senescence, TO:0000175 - bacterial blight disease resistance	PO:0001054 - 4 leaf senescence stage
PH	LOC_Os08g39810	8	25194583	25202691	-	267327602	retrotransposon 20protein 2C 20putative 2C 20unclassified 2C 20expressed	QTN	IGKV_WS2021	_	JMJ717	_	Jumonji 717			Os08g0508500
PH	LOC_Os08g39820	8	25206758	25210102	+	267327602	pre-rRNA-processing 20protein 20TSR2 2C 20putative 2C 20expressed	QTN	IGKV_WS2021
PH	LOC_Os08g39830	8	25211493	25214797	+	267327602	ethylene-insensitive 203 2C 20putative 2C 20expressed	QTN	IGKV_WS2021	EIL4	OsEIL4	ETHYLENE INSENSITIVE-LIKE GENE 4	EIN3-like protein 4, ETHYLENE INSENSITIVE3-LIKE 4, EIN3-LIKE 4	EIN3-LIKE PROTEIN 4	Other	Os08g0508700		GO:0009723 - response to ethylene stimulus, GO:0005634 - nucleus, GO:0006355 - regulation of transcription, DNA-dependent, GO:0003700 - transcription factor activity
PH	LOC_Os08g39840	8	25216363	25224080	-	267327602	lipoxygenase 2C 20chloroplast 20precursor 2C 20putative 2C 20expressed	QTN	IGKV_WS2021	_	Lox2:Os:1, OsLOX9, LOX9, OsLOX8, LOX8, OsLOX2, LOX2, OsRLL, OsHI-LOX, HI-LOX, RLL2 LOX, RLL2, Lox2osPil, OsLOX2;1, LOX2;1, OsLOX1, OsLOX7, LOX7	_	lipoxygenase Lox2:Os:1, lipoxygenase 9, lipoxygenase 8, herbivore-induced type 2 13-lipoxygenase, RLL2 lipoxygenase	_	Tolerance and resistance - Disease resistance, Tolerance and resistance - Stress tolerance, Tolerance and resistance - Insect resistance, Biochemical character, Tolerance and resistance	Os08g0508800		GO:0009867 - jasmonic acid mediated signaling pathway, GO:0009611 - response to wounding, GO:0009507 - chloroplast, GO:0009695 - jasmonic acid biosynthetic process, GO:0016036 - cellular response to phosphate starvation, GO:0016165 - lipoxygenase activity, GO:0051707 - response to other organism, GO:0009651 - response to salt stress, GO:0050832 - defense response to fungus, GO:0051607 - defense r…	TO:0000102 - phosphorus sensitivity, TO:0000031 - silicon sensitivity, TO:0000148 - viral disease resistance, TO:0000175 - bacterial blight disease resistance, TO:0000224 - iron sensitivity, TO:0000424 - brown planthopper resistance, TO:0000074 - blast disease, TO:0006001 - salt tolerance, TO:0002668 - jasmonic acid content, TO:0000112 - disease resistance, TO:0000384 - nematode damage resistance
PH	LOC_Os08g39850	8	25240906	25250279	+	267327602	lipoxygenase 2C 20chloroplast 20precursor 2C 20putative 2C 20expressed	QTN	IGKV_WS2021	LOX8	OsLOX8, OsLOX9, LOX9, OsLOX2;3, LOX2;3, OsLOX2, OsLOX1, CM-LOX8	LIPOXYGENASE 8	lipoxygenase 8, lipoxygenase 9	LIPOXYGENASE 8	Biochemical character, Tolerance and resistance - Disease resistance, Tolerance and resistance - Stress tolerance, Tolerance and resistance - Insect resistance	Os08g0509100		GO:0005506 - iron ion binding, GO:0002215 - defense response to nematode, GO:0051607 - defense response to virus, GO:0042594 - response to starvation, GO:0016036 - cellular response to phosphate starvation, GO:0050832 - defense response to fungus, GO:0016165 - lipoxygenase activity, GO:0009266 - response to temperature stimulus, GO:0009507 - chloroplast, GO:0031408 - oxylipin biosynthetic process…	TO:0000432 - temperature response trait, TO:0000384 - nematode damage resistance, TO:0000224 - iron sensitivity, TO:0000102 - phosphorus sensitivity, TO:0000020 - black streak dwarf virus resistance, TO:0000172 - jasmonic acid sensitivity, TO:0000074 - blast disease
PH	LOC_Os08g39860	8	25250314	25254656	-	267327602	Os8bglu27 20- 20beta-glucosidase 20homologue 2C 20similar 20to 20Os4bglu12 20exoglucanase 2C 20expressed	QTN	IGKV_WS2021	BGLU27	Os8bglu27, OsBGlu27	BETA-GLUCOSIDASE 27	beta-glucosidase 27	BETA-GLUCOSIDASE 27	Biochemical character	Os08g0509200		GO:0005975 - carbohydrate metabolic process, GO:0009505 - plant-type cell wall, GO:0009860 - pollen tube growth, GO:0044272 - sulfur compound biosynthetic process, GO:0008422 - beta-glucosidase activity
PH	LOC_Os08g39870	8	25260124	25266935	-	267327602	Os8bglu28 20- 20beta-glucosidase 20homologue 2C 20similar 20to 20Os4bglu12 20exoglucanase 2C 20expressed	QTN	IGKV_WS2021	BGLU28	Os8bglu28, OsBGlu28	BETA-GLUCOSIDASE 28	beta-glucosidase 28	BETA-GLUCOSIDASE 28	Biochemical character	Os08g0509400		GO:0008422 - beta-glucosidase activity, GO:0005975 - carbohydrate metabolic process, GO:0005983 - starch catabolic process, GO:0009860 - pollen tube growth, GO:0009505 - plant-type cell wall, GO:0004565 - beta-galactosidase activity, GO:0033907 - beta-D-fucosidase activity
PH	LOC_Os08g39880	8	25270058	25273628	+	267327602	G-patch 20domain 20containing 20protein 2C 20expressed	QTN	IGKV_WS2021
PH	LOC_Os08g39890	8	25274449	25278696	-	267327602	OsSPL14 20- 20SBP-box 20gene 20family 20member 2C 20expressed	QTN	IGKV_WS2021	WFP	OsSPL14, SPL14, IPA1, WFP/IPA1, OsSPL14/WFP/IPA1, OsIPA1, IPA1/OsSPL14	WEALTHY FARMER'S PANICLE	IDEAL PLANT ARCHITECTURE 1, Ideal Plant Architecture 1, Ideal Plant Architecture1, Squamosa promoter-binding-like protein 14, SQUAMOSA PROMOTER BINDING PROTEIN-LIKE 14, Squamosa promoter binding protein like-14, IDEAL PLANT ARCHITECTURE1	SQUAMOSA PROMOTER BINDING PROTEIN-LIKE 14	Vegetative organ - Culm, Character as QTL - Plant growth activity, Character as QTL - Yield and productivity, Tolerance and resistance - Stress tolerance, Vegetative organ - Leaf, Seed - Physiological traits - Dormancy, Reproductive organ - Panicle, Mode of branching, Seed, Tolerance and resistance - Disease resistance	Os08g0509600		GO:0050832 - defense response to fungus, GO:0009740 - gibberellic acid mediated signaling, GO:0006350 - transcription, GO:0008270 - zinc ion binding, GO:0005634 - nucleus, GO:0009409 - response to cold, GO:0042742 - defense response to bacterium, GO:0010371 - regulation of gibberellin biosynthetic process, GO:0003677 - DNA binding, GO:0010050 - vegetative phase change, GO:0048366 - leaf developme…	TO:0000152 - panicle number, TO:0000455 - seed set percent, TO:0000011 - nitrogen sensitivity, TO:0000166 - gibberellic acid sensitivity, TO:0000547 - primary branch number, TO:0000135 - leaf length, TO:0002689 - leaf sheath length, TO:0000179 - biotic stress trait, TO:0000447 - filled grain number, TO:0000303 - cold tolerance, TO:0000653 - seed development trait, TO:0000074 - blast disease, TO:0…	PO:0001170 - seed development stage , PO:0001083 - inflorescence development stage , PO:0025034 - leaf , PO:0025487 - bract primordium , PO:0007057 - 0 seed germination stage
PH	LOC_Os08g39900	8	25280969	25281595	+	267327602	hypothetical 20protein	QTN	IGKV_WS2021
PH	LOC_Os08g39910	8	25289947	25292941	-	267327602	retrotransposon 20protein 2C 20putative 2C 20Ty3-gypsy 20subclass 2C 20expressed	QTN	IGKV_WS2021
PH	LOC_Os08g39930	8	25301960	25302289	-	267327602	expressed 20protein	QTN	IGKV_WS2021
PH	LOC_Os08g39940	8	25309428	25311744	-	267327602	polygalacturonase 20inhibitor 201 20precursor 2C 20putative 2C 20expressed	QTN	IGKV_WS2021
PH	LOC_Os08g39950	8	25313536	25318570	+	267327602	potassium 20transporter 2C 20putative 2C 20expressed	QTN	IGKV_WS2021	HAK26	OsHAK26	HIGH-AFFINITY POTASSIUM(K+) TRANSPORTER 26	High-affinity Potassium(K+) Transporter 26, Potassium transporter 26	HIGH-AFFINITY POTASSIUM(K+) TRANSPORTER 26	Biochemical character	Os08g0510300		GO:0030955 - potassium ion binding, GO:0006813 - potassium ion transport, GO:0015079 - potassium ion transmembrane transporter activity, GO:0016021 - integral to membrane
PH	LOC_Os08g39960	8	25319022	25320721	-	267327602	3-oxoacyl-reductase 2C 20chloroplast 20precursor 2C 20putative 2C 20expressed	QTN	IGKV_WS2021	_		_	ketoacyIACP reductase		Biochemical character	Os08g0510400		GO:0006629 - lipid metabolic process
PH	LOC_Os08g39970	8	25321532	25325637	+	267327602	ENT 20domain 20containing 20protein 2C 20expressed	QTN	IGKV_WS2021
PH	LOC_Os08g39980	8	25325994	25329360	-	267327602	DNA-binding 20bromodomain-containing 20protein 2C 20putative 2C 20expressed	QTN	IGKV_WS2021	BRD2	OsBrd2, Brd2	BROMODOMAIN-CONTAINING PROTEIN 2	MYB transcription factor, bromodomain-containing protein 2	BROMODOMAIN-CONTAINING PROTEIN 2	Tolerance and resistance - Stress tolerance, Other	Os08g0510700		GO:0009414 - response to water deprivation, GO:0003682 - chromatin binding, GO:0009651 - response to salt stress, GO:0003677 - DNA binding	TO:0006001 - salt tolerance, TO:0000276 - drought tolerance
PH	LOC_Os08g40010	8	25341100	25343949	+	267327602	expressed 20protein	QTN	IGKV_WS2021
PH	LOC_Os08g40020	8	25344705	25346660	+	267327602	selenium 20binding 20protein 2C 20putative 2C 20expressed	QTN	IGKV_WS2021
PH	LOC_Os08g40030	8	25351524	25353753	-	267327602	CUP-SHAPED 20COTYLEDON3 2C 20putative 2C 20expressed	QTN	IGKV_WS2021	CUC3	OsCUC3, ONAC107, NAC107, DLN214, OsDLN214	CUP-SHAPED COTYLEDON 3	cup-shaped cotyledon 3, NAC domain-containing protein 107, CUP-SHAPED COTYLEDON3, DLN repressor 214, DLN motif protein 214		Seed - Morphological traits - Embryo, Reproductive organ - Spikelet, flower, glume, awn, Vegetative organ - Leaf	Os08g0511200		GO:0009790 - embryonic development, GO:0010199 - organ boundary specification between lateral organs and the meristem, GO:0045449 - regulation of transcription, GO:0010492 - maintenance of shoot apical meristem identity, GO:0048366 - leaf development, GO:0009791 - post-embryonic development, GO:0048508 - embryonic meristem development, GO:0003677 - DNA binding	TO:0006020 - shoot apical meristem development, TO:0000225 - stamen number, TO:0000655 - leaf development trait	PO:0009009 - plant embryo , PO:0025395 - floral organ , PO:0009049 - inflorescence , PO:0020148 - shoot apical meristem , PO:0020104 - leaf sheath , PO:0009055 - bract , PO:0020103 - flag leaf , PO:0001050 - leaf development stage , PO:0025034 - leaf , PO:0009005 - root , PO:0020142 - stem internode
PH	LOC_Os08g40040	8	25354797	25360133	-	267327602	expressed 20protein	QTN	IGKV_WS2021
PH	LOC_Os08g40050	8	25360469	25363577	-	267327602	retrotransposon 20protein 2C 20putative 2C 20unclassified 2C 20expressed	QTN	IGKV_WS2021
PH	LOC_Os08g40060	8	25365819	25367334	-	267327602	expressed 20protein	QTN	IGKV_WS2021
PH	LOC_Os08g40070	8	25370364	25371037	+	267327602	expressed 20protein	QTN	IGKV_WS2021
PH	LOC_Os08g40080	8	25374630	25375317	-	267327602	expressed 20protein	QTN	IGKV_WS2021
PH	LOC_Os08g40090	8	25377687	25381281	-	267327602	leucine 20rich 20repeat 20containing 20protein 2C 20expressed	QTN	IGKV_WS2021	PI55-1	pi55-1, pi55(t), OsIRL4	PYRICULARIA ORYZAE RESISTANCE 55-1	Pyricularia oryzae resistance 55-1, Magnaporthe grisea resistance 55-1, Blast resistance 55-1, intracellular Ras-group-related LRR protein 4		Tolerance and resistance - Disease resistance	Os08g0511700		GO:0005886 - plasma membrane, GO:0009620 - response to fungus		PO:0009005 - root
PH	LOC_Os08g40100	8	25385363	25387275	-	267327602	expressed 20protein	QTN	IGKV_WS2021
PH	LOC_Os08g40110	8	25388360	25392320	-	267327602	peptidase 2C 20putative 2C 20expressed	QTN	IGKV_WS2021
PH	LOC_Os08g40120	8	25395339	25397632	+	267327602	expressed 20protein	QTN	IGKV_WS2021
PH	LOC_Os08g40555	8	25674428	25675948	-	267804009	ATPase 2C 20E1-E2 20type 2C 20putative 2C 20expressed	QTN	IGKV_WS2020
PH	LOC_Os08g40560	8	25676686	25682411	-	267804009	ZOS8-11 20- 20C2H2 20zinc 20finger 20protein 2C 20expressed	QTN	IGKV_WS2020	_	ZOS8-11	_				Os08g0517300		GO:0016607 - nuclear speck, GO:0010267 - production of ta-siRNAs involved in RNA interference, GO:0005829 - cytosol, GO:0005730 - nucleolus, GO:0008270 - zinc ion binding, GO:0031053 - primary microRNA processing, GO:0009507 - chloroplast, GO:0048367 - shoot development, GO:0048509 - regulation of meristem development, GO:2000011 - regulation of adaxial/abaxial pattern formation
PH	LOC_Os08g40570	8	25683429	25686522	-	267804009	pyridoxamine 205 27-phosphate 20oxidase 20family 20protein 2C 20putative 2C 20expressed	QTN	IGKV_WS2020
PH	LOC_Os08g40580	8	25687620	25690627	-	267804009	methyltransferase 20domain 20containing 20protein 2C 20expressed	QTN	IGKV_WS2020
PH	LOC_Os08g40590	8	25694808	25699639	+	267804009	oxysterol-binding 20protein 2C 20putative 2C 20expressed	QTN	IGKV_WS2020
PH	LOC_Os08g40610	8	25702617	25704363	-	267804009	30S 20ribosomal 20protein 20S16 2C 20putative 2C 20expressed	QTN	IGKV_WS2020	_	RPS16, OsRPS16, rps16	_	ribosomal protein S16, ribosomal protein small subunit 16	_	Other	Os08g0517900		GO:0006412 - translation, GO:0005840 - ribosome, GO:0003735 - structural constituent of ribosome
PH	LOC_Os08g40615	8	25707694	25708488	+	267804009	expressed 20protein	QTN	IGKV_WS2020
PH	LOC_Os08g40620	8	25712814	25717641	+	267804009	rabGAP 2FTBC 20domain-containing 20protein 2C 20putative 2C 20expressed	QTN	IGKV_WS2020	_	MAP	_	MICROTUBULE-ASSOCIATED PROTEIN			Os08g0518100		GO:0005622 - intracellular, GO:0032851 - positive regulation of Rab GTPase activity, GO:0005097 - Rab GTPase activator activity
PH	LOC_Os08g40630	8	25719255	25721977	-	267804009	mTERF 20domain 20containing 20protein 2C 20expressed	QTN	IGKV_WS2020
PH	LOC_Os08g40640	8	25723118	25733446	-	267804009	retrotransposon 20protein 2C 20putative 2C 20Ty1-copia 20subclass 2C 20expressed	QTN	IGKV_WS2020	_	Os_F0488, OsFBX496, FBX496	_	F-box-type E3 ubiquitin ligase X496			Os08g0518300
PH	LOC_Os08g40650	8	25735566	25743180	+	267804009	senescence-induced 20receptor-like 20serine 2Fthreonine-protein 20kinase 20precursor 2C 20putative 2C 20expressed	QTN	IGKV_WS2020
PH	LOC_Os08g40660	8	25745440	25750374	-	267804009	retrotransposon 20protein 2C 20putative 2C 20unclassified 2C 20expressed	QTN	IGKV_WS2020
PH	LOC_Os08g40670	8	25751920	25753326	-	267804009	retrotransposon 20protein 2C 20putative 2C 20unclassified	QTN	IGKV_WS2020
PH	LOC_Os08g40680	8	25758851	25759949	-	267804009	glycosyl 20hydrolase 2C 20putative 2C 20expressed	QTN	IGKV_WS2020	_	OsGH	_	glycosyl hydrolase		Biochemical character, Tolerance and resistance - Stress tolerance	Os08g0518800		GO:0005975 - carbohydrate metabolic process, GO:0003824 - catalytic activity
PH	LOC_Os08g40690	8	25762457	25763824	+	267804009	glycosyl 20hydrolase 2C 20putative 2C 20expressed	QTN	IGKV_WS2020	_	C10122	_			Biochemical character, Tolerance and resistance - Disease resistance	Os08g0518900		GO:0005975 - carbohydrate metabolic process, GO:0004568 - chitinase activity
PH	LOC_Os08g40700	8	25764973	25766508	+	267804009	retrotransposon 20protein 2C 20putative 2C 20unclassified 2C 20expressed	QTN	IGKV_WS2020
PH	LOC_Os08g40710	8	25767549	25768882	-	267804009	retrotransposon 20protein 2C 20putative 2C 20unclassified 2C 20expressed	QTN	IGKV_WS2020
PH	LOC_Os08g40720	8	25769807	25771549	-	267804009	FAD-binding 20and 20arabino-lactone 20oxidase 20domains 20containing 20protein 2C 20putative 2C 20expressed	QTN	IGKV_WS2020
PH	LOC_Os08g40730	8	25773643	25774482	+	267804009	retrotransposon 20protein 2C 20putative 2C 20unclassified 2C 20expressed	QTN	IGKV_WS2020
PH	LOC_Os08g40740	8	25778456	25779361	-	267804009	glycosyl 20hydrolase 2C 20putative 2C 20expressed	QTN	IGKV_WS2020
PH	LOC_Os08g40750	8	25781185	25785491	-	267804009	expressed 20protein	QTN	IGKV_WS2020
PH	LOC_Os08g40770	8	25789101	25792361	+	267804009	retrotransposon 20protein 2C 20putative 2C 20Ty3-gypsy 20subclass 2C 20expressed	QTN	IGKV_WS2020
PH	LOC_Os08g40780	8	25794353	25796775	-	267804009	hypothetical 20protein	QTN	IGKV_WS2020
PH	LOC_Os08g40790	8	25799137	25804334	-	267804009	DNA 20repair 20ATPase-related 2C 20putative 2C 20expressed	QTN	IGKV_WS2020	_	BIP129	_	brassinosteroid receptor kinase (BRI1)-interacting protein 129, BRI1-interacting protein 129, brassinosteroid receptor kinase-interacting protein 129			Os08g0519400		GO:0005783 - endoplasmic reticulum, GO:0005886 - plasma membrane
PH	LOC_Os08g40820	8	25817761	25823466	+	267804009	expressed 20protein	QTN	IGKV_WS2020
PH	LOC_Os08g40830	8	25829043	25844594	+	267804009	pumilio 20domain-containing 20protein 20PPD1 2C 20putative 2C 20expressed	QTN	IGKV_WS2020
PH	LOC_Os08g40840	8	25845388	25847982	-	267804009	exo70 20exocyst 20complex 20subunit 2C 20putative 2C 20expressed	QTN	IGKV_WS2020	EXO70I1	OsEXO70I1, OsExo70I1, OrysaI1_Exo70	EXOCYST SUBUNIT EXO70 FAMILY PROTEIN I1	exocyst subunit EXO70 family protein I1	EXOCYST SUBUNIT EXO70 FAMILY PROTEIN I1		Os08g0519900		GO:0000145 - exocyst, GO:0006887 - exocytosis
PH	LOC_Os08g40850	8	25848628	25853121	-	267804009	mitochondrial 20carrier 20protein 2C 20putative 2C 20expressed	QTN	IGKV_WS2020	_	BTI-1	_			Biochemical character	Os08g0520000		GO:0016021 - integral to membrane, GO:0055085 - transmembrane transport
PH	LOC_Os08g40860	8	25853729	25857347	+	267804009	RNA 20pseudouridine 20synthase 2C 20putative 2C 20expressed	QTN	IGKV_WS2020
PH	LOC_Os08g40870	8	25857160	25858341	-	267804009	pentatricopeptide 20repeat 20protein 2C 20putative 2C 20expressed	QTN	IGKV_WS2020
PH	LOC_Os08g40880	8	25859014	25864878	-	267804009	RNA 20recognition 20motif 20containing 20protein 2C 20putative 2C 20expressed	QTN	IGKV_WS2020	RBP-208	OsRBP-208	RNA-BINDING PROTEIN 208	RNA-Binding Protein 208	RNA-BINDING PROTEIN 208		Os08g0520300		GO:0003729 - mRNA binding
PH	LOC_Os08g40890	8	25867085	25870277	-	267804009	spermidine 20synthase-related 2C 20putative 2C 20expressed	QTN	IGKV_WS2020
PH	LOC_Os08g40900	8	25870712	25877680	-	267804009	auxin 20response 20factor 2C 20putative 2C 20expressed	QTN	IGKV_WS2020	ARF7B	OsARF7b, OsARF21, DLN216, OsDLN216	AUXIN RESPONSE FACTOR 7B	auxin response factor-7b, auxin response factor 7b, auxin response factor-21, auxin response factor 21, DLN repressor 216, DLN motif protein 216	AUXIN RESPONSE FACTOR 7B	Reproductive organ - panicle, Seed - Morphological traits - Grain shape, Character as QTL - Yield and productivity, Reproductive organ - Spikelet, flower, glume, awn, Other, Vegetative organ - Culm	Os08g0520500		GO:0009734 - auxin mediated signaling pathway, GO:0006355 - regulation of transcription, DNA-dependent, GO:0006350 - transcription, GO:0005634 - nucleus, GO:0003677 - DNA binding	TO:0000411 - seed length to width ratio, TO:0000590 - grain weight, TO:0000734 - grain length, TO:0000456 - spikelet number, TO:0000207 - plant height, TO:0000382 - 1000-seed weight, TO:0000152 - panicle number
PH	LOC_Os09g11670	9	6510145	6510600	-	276984995 , 277028501	expressed 20protein	nongenic	WS20
PH	LOC_Os09g11680	9	6515815	6520248	-	276984995 , 277028501	retrotransposon 20protein 2C 20putative 2C 20unclassified 2C 20expressed	nongenic	WS20
PH	LOC_Os09g11730	9	6542918	6549115	-	276984995 , 277028501	expressed 20protein	nongenic	WS20
PH	LOC_Os09g11740	9	6556858	6562509	-	276984995 , 277028501	retrotransposon 20protein 2C 20putative 2C 20Ty1-copia 20subclass	nongenic	WS20
PH	LOC_Os09g23725	9	14102039	14103804	-	284576658,284576343	expressed 20protein	genic	ISAH
PH	LOC_Os09g23730	9	14106177	14107337	-	284576658,284576343	HMG-Y-related 20protein 20A 2C 20putative 2C 20expressed	nongenic	ISAH	_	Os-PF1, PF1	_	positive factor 1		Other	Os09g0402100		GO:0001708 - cell fate specification, GO:0000786 - nucleosome, GO:0006355 - regulation of transcription, DNA-dependent, GO:0006334 - nucleosome assembly, GO:0008283 - cell proliferation, GO:0003677 - DNA binding, GO:0005634 - nucleus
PH	LOC_Os10g33440	10	17606602	17613157	+	311104171 , 311099466	NB-ARC 20domain 20containing 20protein 2C 20expressed	nongenic	WS20
PH	LOC_Os10g33450	10	17616226	17617209	-	311104171 , 311099466	expressed 20protein	nongenic	WS20
PH	LOC_Os10g33460	10	17619114	17623642	-	311104171 , 311099466	alcohol 20oxidase 2C 20putative 2C 20expressed	nongenic	WS20	_		_	GMC oxidoreductase		Tolerance and resistance - Disease resistance	Os10g0474900
PH	LOC_Os11g08300	11	4375281	4380044	+	321068553,321102693	aldehyde 20dehydrogenase 2C 20putative 2C 20expressed	genic	IGKV	ALDH3H2	OsALDH3H2	ALDEHYDE DEHYDROGENASE 3H2	Aldehyde dehydrogenase 3H2	ALDEHYDE DEHYDROGENASE 3H2	Biochemical character	Os11g0186200		GO:0016021 - integral to membrane, GO:0016491 - oxidoreductase activity, GO:0006081 - cellular aldehyde metabolic process, GO:0004030 - aldehyde dehydrogenase [NAD(P)+] activity
PH	LOC_Os11g08360	11	4409602	4410033	+	321068553,321102693	expressed 20protein	nongenic	IGKV
PH	LOC_Os11g08370	11	4413240	4415870	+	321068553,321102693	transporter 2C 20major 20facilitator 20family 2C 20putative 2C 20expressed	nongenic	IGKV	PT25	OsPT25	PHOSPHATE TRANSPORTER 25	phosphate transporter 25	PHOSPHATE TRANSPORTER 25	Biochemical character	Os11g0186800		GO:0005886 - plasma membrane, GO:0005315 - inorganic phosphate transmembrane transporter activity, GO:0005789 - endoplasmic reticulum membrane, GO:0009536 - plastid, GO:0016021 - integral to membrane
PH	LOC_Os11g10080	11	5436885	5437421	+	322132907	expressed 20protein	nongenic	IGKV, WS21
PH	LOC_Os11g10090	11	5441804	5448578	+	322132907	transposon 20protein 2C 20putative 2C 20CACTA 2C 20En 2FSpm 20sub-class 2C 20expressed	nongenic	IGKV, WS21
PH	LOC_Os11g10140	11	5491381	5493004	-	322234460,322190979	flavin 20monooxygenase 2C 20putative 2C 20expressed	nongenic	ISAH	YUCCA13	OsYUCCA13, OsYUC13	YUCCA-LIKE GENE 13			Biochemical character	Os11g0207700
PH	LOC_Os11g10160	11	5511173	5512067	-	322234460,322190979	expressed 20protein	nongenic	ISAH	_	Os_F0690, Fbox-12-pseuso	_	F-box family-12 pseudogene			Os11g0207800
PH	LOC_Os11g10200	11	5530074	5534187	-	322228353,322190979	OsFBX413 20- 20F-box 20domain 20containing 20protein 2C 20expressed	nongenic	ISAH	_	OsFbox588, Os_F0365, Fbox-10, OsFBX413, FBX413	_	F-box protein 588, F-box family-10, F-box-type E3 ubiquitin ligase X413			Os11g0208100
PH	LOC_Os11g10210	11	5540546	5541022	+	322234460,322190979	transposon 20protein 2C 20putative 2C 20unclassified	nongenic	ISAH
PH	LOC_Os11g10220	11	5546836	5548390	-	322234460,322190979	retrotransposon 20protein 2C 20putative 2C 20Ty1-copia 20subclass	nongenic	ISAH	_	Fbox-9-pseudo, Os_F0394, OsFBX497, FBX497	_	F-box family-9 pseudogene, F-box-type E3 ubiquitin ligase X497			Os11g0208300
PH	LOC_Os11g18810	11	10672016	10678746	+	327366997 , 327403398	retrotransposon 20protein 2C 20putative 2C 20Ty3-gypsy 20subclass 2C 20expressed	genic	WS20
PH	LOC_Os11g18850	11	10705019	10705285	-	327366997 , 327403398	retrotransposon 20protein 2C 20putative 2C 20unclassified	nongenic	WS20
PH	LOC_Os11g18860	11	10718258	10718626	-	327366997 , 327403398	expressed 20protein	nongenic	WS20
PH	LOC_Os11g31550	11	18435551	18438196	-	335131056,335134665	BRASSINOSTEROID 20INSENSITIVE 201-associated 20receptor 20kinase 201 20precursor 2C 20putative 2C 20expressed	nongenic	ISARC
PH	LOC_Os11g31560	11	18443561	18445650	-	335131056,335134665	BRASSINOSTEROID 20INSENSITIVE 201-associated 20receptor 20kinase 201 20precursor 2C 20putative 2C 20expressed	nongenic	ISARC
PH	LOC_Os11g32650	11	19277557	19281016	-	336068787	chalcone 20synthase 2C 20putative 2C 20expressed	QTN	ISARC_WS2021	CHS	CHS*, Oschs, chs, chas, OsCHS, OsCHS1, CHS1, OsPKS26, PKS26, OsCHS24, CHS24, OsCHS27, CHS27	CHALCONE SYNTHASE	Chalcone synthase, Naregenin-chalcone synthase, chalcone synthase, chalcone synthase 1, polyketide synthase 26, Chalcone synthase 24	CHALCONE SYNTHASE	Seed, Coloration - Anthocyanin, Tolerance and resistance, Biochemical character, Tolerance and resistance - Insect resistance, Tolerance and resistance - Stress tolerance, Seed - Morphological traits, Tolerance and resistance - Disease resistance	Os11g0530600		GO:0030639 - polyketide biosynthetic process, GO:0009411 - response to UV, GO:0051553 - flavone biosynthetic process, GO:0042742 - defense response to bacterium, GO:0009813 - flavonoid biosynthetic process, GO:0016747 - transferase activity, transferring acyl groups other than amino-acyl groups, GO:0008415 - acyltransferase activity, GO:0009718 - anthocyanin biosynthetic process, GO:0009408 - res…	TO:0000424 - brown planthopper resistance, TO:0000707 - pericarp color, TO:0000160 - UV light sensitivity, TO:0000290 - flavonoid content, TO:0000175 - bacterial blight disease resistance, TO:0000071 - anthocyanin content, TO:0000259 - heat tolerance, TO:0006001 - salt tolerance, TO:0000653 - seed development trait, TO:0000172 - jasmonic acid sensitivity	PO:0020104 - leaf sheath , PO:0009006 - shoot system , PO:0009047 - stem , PO:0001170 - seed development stage , PO:0009005 - root
PH	LOC_Os11g32660	11	19288363	19291805	+	336068787	transposon 20protein 2C 20putative 2C 20unclassified 2C 20expressed	QTN	ISARC_WS2021
PH	LOC_Os11g32670	11	19292412	19292934	-	336068787	GRF 20zinc 20finger 20family 20protein 2C 20expressed	QTN	ISARC_WS2021
PH	LOC_Os11g32680	11	19295188	19298897	-	336068787	transposon 20protein 2C 20putative 2C 20CACTA 2C 20En 2FSpm 20sub-class 2C 20expressed	QTN	ISARC_WS2021
PH	LOC_Os11g32690	11	19301433	19303628	-	336068787	transposon 20protein 2C 20putative 2C 20CACTA 2C 20En 2FSpm 20sub-class 2C 20expressed	QTN	ISARC_WS2021
PH	LOC_Os11g32710	11	19319625	19319927	+	336068787	hypothetical 20protein	QTN	ISARC_WS2021
PH	LOC_Os11g32720	11	19331048	19335511	+	336068787	zinc 20knuckle 20domain 20containing 20protein 2C 20expressed	QTN	ISARC_WS2021
PH	LOC_Os11g32740	11	19349000	19349308	+	336068787	expressed 20protein	QTN	ISARC_WS2021
PH	LOC_Os11g32750	11	19352839	19357431	+	336068787	hydrolase 2C 20NUDIX 20family 2C 20domain 20containing 20protein 2C 20expressed	QTN	ISARC_WS2021	NUDX13	OsNUDX13	NUDIX HYDROLASE 13	Nudix Hydrolase 13	NUDIX HYDROLASE 13	Biochemical character, Tolerance and resistance - Stress tolerance	Os11g0531700		GO:0005737 - cytoplasm, GO:0010225 - response to UV-C, GO:0005634 - nucleus, GO:0016787 - hydrolase activity	TO:0000160 - UV light sensitivity
PH	LOC_Os11g32759	11	19354776	19358116	-	336068787	expressed 20protein	QTN	ISARC_WS2021
PH, PL	LOC_Os11g32790	11	19369196	19370612	-	336068787, 336104294	expressed 20protein	QTN	ISARC_WS2021, ISARC_WS2020
PH, PL	LOC_Os11g32800	11	19375488	19376140	-	336068787,336084192, 336104294	hypothetical 20protein	nongenic, QTN, QTN	ISARC, ISARC_WS2021, ISARC_WS2020
PH, PL	LOC_Os11g32810	11	19385005	19388767	+	336068787,336084192, 336104294	Leucine 20Rich 20Repeat 20family 20protein 2C 20expressed	nongenic, QTN, QTN	ISARC, ISARC_WS2021, ISARC_WS2020	_	OsFbox601, Os_F0719, OsFBL68, FBL68	_	F-box protein 601, F-box-type E3 ubiquitin ligase L68			Os11g0532600
PH, PL	LOC_Os11g32820	11	19390540	19390983	-	336068787,336084192, 336104294	expressed 20protein	nongenic, QTN, QTN	ISARC, ISARC_WS2021, ISARC_WS2020
PH	LOC_Os11g32830	11	19394377	19394703	+	336068787,336084192	retrotransposon 20protein 2C 20putative 2C 20unclassified	nongenic	ISARC
PH, PL	LOC_Os11g32870	11	19416453	19420179	+	336068787, 336104294	expressed 20protein	QTN	ISARC_WS2021, ISARC_WS2020
PH, PL	LOC_Os11g32880	11	19421481	19429665	-	336068787, 336104294	DEAD-box 20ATP-dependent 20RNA 20helicase 2C 20putative 2C 20expressed	QTN	ISARC_WS2021, ISARC_WS2020
PH, PL	LOC_Os11g32890	11	19430335	19431158	-	336068787, 336104294	expressed 20protein	QTN	ISARC_WS2021, ISARC_WS2020	_		_			Tolerance and resistance - Stress tolerance	Os11g0533400		GO:0009408 - response to heat	TO:0000259 - heat tolerance
PH, PL	LOC_Os11g32900	11	19433454	19439903	+	336068787, 336104294	retinoblastoma-related 20protein-like 2C 20putative 2C 20expressed	QTN	ISARC_WS2021, ISARC_WS2020	RB1	Orysa;Rb1, OsRBR1, RBR1, OsRBR2, RBR2	RETINOBLASTOMA PROTEIN HOMOLOG 1	retinoblastoma protein homolog 1, etinoblastoma-related 1, retinoblastoma-related protein-2	RETINOBLASTOMA PROTEIN HOMOLOG 1	Reproductive organ - Spikelet, flower, glume, awn, Reproductive organ - Pollination, fertilization, fertility - Male sterility, Other	Os11g0533500		GO:0009556 - microsporogenesis, GO:0048655 - tapetal layer morphogenesis, GO:0007049 - cell cycle, GO:0009555 - pollen development, GO:0045786 - negative regulation of cell cycle, GO:0048653 - anther development, GO:0051445 - regulation of meiotic cell cycle, GO:0051726 - regulation of cell cycle, GO:0006351 - transcription, DNA-dependent, GO:0048366 - leaf development, GO:0005829 - cytosol, GO:0…	TO:0000730 - mitotic cell cycle trait, TO:0000218 - pollen abortion type, TO:0000485 - sterility related trait, TO:0000531 - anther length, TO:0000187 - anther color, TO:0000245 - pollen free	PO:0009005 - root , PO:0001007 - pollen development stage , PO:0020021 - integument , PO:0020003 - plant ovule , PO:0009029 - stamen , PO:0000002 - anther wall , PO:0001050 - leaf development stage , PO:0025034 - leaf , PO:0009066 - anther , PO:0009047 - stem , PO:0001004 - anther development stage
PH, PL	LOC_Os11g32910	11	19440078	19442776	-	336068787, 336104294	expressed 20protein	QTN	ISARC_WS2021, ISARC_WS2020
PH, PL	LOC_Os11g32920	11	19444268	19444513	+	336068787, 336104294	hypothetical 20protein	QTN	ISARC_WS2021, ISARC_WS2020
PH, PL	LOC_Os11g32930	11	19448126	19448818	+	336068787, 336104294	expressed 20protein	QTN	ISARC_WS2021, ISARC_WS2020
PH, PL	LOC_Os11g32940	11	19449009	19453866	-	336068787, 336104294	OsFBX421 20- 20F-box 20domain 20containing 20protein 2C 20expressed	QTN	ISARC_WS2021, ISARC_WS2020	_	OsFbox602, Os_F0512, OsFBX421, FBX421	_	F-box protein 602, F-box-type E3 ubiquitin ligase X421			Os11g0533800
PH	LOC_Os11g35860	11	21046482	21048482	-	337840686	OsWAK120 20- 20OsWAK 20receptor-like 20protein 20kinase 2C 20expressed	QTN	IGKV_WS2020	WAK120	OsWAK120	WALL-ASSOCIATED KINASE GENE 120		WALL-ASSOCIATED KINASE 120	Biochemical character	Os11g0565300		GO:0005524 - ATP binding, GO:0005509 - calcium ion binding, GO:0030247 - polysaccharide binding, GO:0004674 - protein serine/threonine kinase activity
PH	LOC_Os11g35870	11	21050922	21056202	-	337840686	RWD 20domain 20containing 20protein 2C 20expressed	QTN	IGKV_WS2020	RING424	OsRING424	RING-TYPE E3 UBIQUITIN LIGASE 424	RING-type E3 ubiquitin ligase 424			Os11g0565400
PH	LOC_Os11g35890	11	21079383	21082340	+	337840686	leucine 20rich 20repeat 20protein 2C 20putative 2C 20expressed	QTN	IGKV_WS2020
PH	LOC_Os11g35910	11	21088110	21091305	+	337840686	retrotransposon 20protein 2C 20putative 2C 20Ty3-gypsy 20subclass 2C 20expressed	QTN	IGKV_WS2020
PH	LOC_Os11g35920	11	21092312	21102627	-	337840686	retrotransposon 20protein 2C 20putative 2C 20Ty3-gypsy 20subclass 2C 20expressed	QTN	IGKV_WS2020
PH	LOC_Os11g35930	11	21102794	21104586	+	337840686	chalcone 20synthase 2C 20putative 2C 20expressed	QTN	IGKV_WS2020	PKS27	OsPKS27, OsCHS25, CHS25, OsCHS28, CHS28	POLYKETIDE SYNTHASE 27	polyketide synthase 27, Chalcone synthase 25	POLYKETIDE SYNTHASE 27	Biochemical character, Tolerance and resistance - Stress tolerance	Os11g0566800		GO:0009739 - response to gibberellin stimulus, GO:0009753 - response to jasmonic acid stimulus, GO:0030639 - polyketide biosynthetic process, GO:0009813 - flavonoid biosynthetic process, GO:0016747 - transferase activity, transferring acyl groups other than amino-acyl groups, GO:0009651 - response to salt stress, GO:0009409 - response to cold, GO:0009735 - response to cytokinin stimulus	TO:0006001 - salt tolerance, TO:0000172 - jasmonic acid sensitivity, TO:0000303 - cold tolerance, TO:0000166 - gibberellic acid sensitivity, TO:0000167 - cytokinin sensitivity
PH	LOC_Os11g35960	11	21131669	21132161	+	337840686	Leucine 20rich 20repeat 20N-terminal 20domain 20containing 20protein 2C 20putative 2C 20expressed	QTN	IGKV_WS2020
PH	LOC_Os11g35970	11	21135675	21141970	-	337840686	retrotransposon 20protein 2C 20putative 2C 20unclassified 2C 20expressed	QTN	IGKV_WS2020
PH	LOC_Os11g36000	11	21156776	21159062	+	337840686	receptor-like 20protein 20kinase 202 20precursor 2C 20putative 2C 20expressed	QTN	IGKV_WS2020
PH	LOC_Os11g36005	11	21161254	21162387	+	337840686	expressed 20protein	QTN	IGKV_WS2020
PH	LOC_Os11g36010	11	21162954	21165595	+	337840686	expressed 20protein	QTN	IGKV_WS2020
PH	LOC_Os11g36020	11	21175718	21177655	+	337840686	leucine 20rich 20repeat 20protein 2C 20putative 2C 20expressed	QTN	IGKV_WS2020
PH	LOC_Os11g36030	11	21178214	21182284	-	337840686	protein 20binding 20protein 2C 20putative 2C 20expressed	QTN	IGKV_WS2020
PH	LOC_Os11g36050	11	21185518	21187738	+	337840686	prefoldin 20subunit 2C 20putative 2C 20expressed	QTN	IGKV_WS2020
PH	LOC_Os11g36060	11	21188305	21197971	+	337840686	THUMP 20domain-containing 20protein 2C 20putative 2C 20expressed	QTN, genic	IGKV_WS2020, WS20
PH	LOC_Os11g36070	11	21201715	21207327	+	337840686	expressed 20protein	QTN	IGKV_WS2020
PH	LOC_Os11g36090	11	21210711	21216313	-	337840686	receptor 20kinase 2C 20putative 2C 20expressed	QTN	IGKV_WS2020
PH	LOC_Os11g36120	11	21232639	21235267	-	337840686	receptor-like 20protein 20kinase 20precursor 2C 20putative 2C 20expressed	QTN, nongenic	IGKV_WS2020, WS20
PH	LOC_Os11g36130	11	21240792	21241744	-	337840686	hypothetical 20protein	QTN, nongenic	IGKV_WS2020, WS20
PH	LOC_Os11g36140	11	21243403	21246815	-	337840686	receptor-like 20protein 20kinase 202 20precursor 2C 20putative 2C 20expressed	QTN	IGKV_WS2020
PH, PL	LOC_Os11g38800	11	23065945	23072824	+	339864519, 339728839	zinc 20finger 20family 20protein 2C 20putative 2C 20expressed	QTN	ISAH_WS2021, IGKV_WS2020	RING312	OsRING312	RING-TYPE E3 UBIQUITIN LIGASE 312	RING-type E3 ubiquitin ligase 312			Os11g0600700
PH, PL	LOC_Os11g38810	11	23077519	23081682	+	339864519, 339728839	mannose-6-phosphate 20isomerase 2C 20putative 2C 20expressed	QTN	ISAH_WS2021, IGKV_WS2020
PH	LOC_Os11g38840	11	23104256	23104793	-	339864519	expressed 20protein	QTN	ISAH_WS2021
PH	LOC_Os11g38850	11	23119941	23123193	+	339864519	TKL_IRAK_DUF26-la.7 20- 20DUF26 20kinases 20have 20homology 20to 20DUF26 20containing 20loci 2C 20expressed	QTN	ISAH_WS2021	GNK2RLK9	OsEnS-147, Gnk2RLK-9, OsGnk2RLK-9	GNK2 DOMAIN CONTAINING RECEPTOR-LIKE KINASE 9	endosperm-specific gene 147, GnK2 domain containing receptor-like kinase-9	GNK2 DOMAIN CONTAINING RECEPTOR-LIKE KINASE 9	Biochemical character	Os11g0601500		GO:0005524 - ATP binding, GO:0004674 - protein serine/threonine kinase activity, GO:0005886 - plasma membrane, GO:0004672 - protein kinase activity, GO:0006468 - protein amino acid phosphorylation, GO:0016021 - integral to membrane		PO:0009009 - plant embryo
PH	LOC_Os11g38860	11	23128489	23134152	+	339864519	methyltransferase 2C 20putative 2C 20expressed	QTN	ISAH_WS2021	_		_	Protein of unknown function DUF248, methyltransferase putative family protein		Biochemical character, Reproductive organ	Os11g0601600		GO:0005737 - cytoplasm, GO:0008757 - S-adenosylmethionine-dependent methyltransferase activity, GO:0032259 - methylation, GO:0016021 - integral to membrane		PO:0000084 - plant sperm cell
PH	LOC_Os11g38870	11	23132264	23137598	-	339864519	helix-loop-helix 20DNA-binding 20domain 20containing 20protein 2C 20expressed	QTN	ISAH_WS2021	BHLH61	OsbHLH061, OsbHLH61, bHLH061, bHLH61	BASIC HELIX-LOOP-HELIX PROTEIN 61	basic helix-loop-helix protein 061	BASIC HELIX-LOOP-HELIX PROTEIN 61	Tolerance and resistance - Stress tolerance	Os11g0601700		GO:0005634 - nucleus, GO:0003677 - DNA binding, GO:0019740 - nitrogen utilization, GO:0009414 - response to water deprivation, GO:0006355 - regulation of transcription, DNA-dependent, GO:0046983 - protein dimerization activity	TO:0000276 - drought tolerance, TO:0000153 - relative yield, TO:0000011 - nitrogen sensitivity
PH	LOC_Os11g38880	11	23140918	23142279	-	339864519	hypothetical 20protein	QTN	ISAH_WS2021
PH	LOC_Os11g38890	11	23148903	23154656	+	339864519	retrotransposon 20protein 2C 20putative 2C 20unclassified 2C 20expressed	QTN	ISAH_WS2021
PH	LOC_Os11g38900	11	23158472	23164258	+	339864519	histone-lysine 20N-methyltransferase 2C 20H3 20lysine-9 20specific 20SUVH1 2C 20putative 2C 20expressed	QTN, genic	ISAH_WS2021, WS21	_	OsSET41, SDG704, OsSUVH1	_	SET protein 41, SUVH Histone Methyltransferase 1		Biochemical character	Os11g0602200		GO:0018024 - histone-lysine N-methyltransferase activity, GO:0003677 - DNA binding, GO:0005634 - nucleus, GO:0005694 - chromosome, GO:0008270 - zinc ion binding
PH	LOC_Os11g38910	11	23166977	23167787	+	339864519	pyruvate 20decarboxylase 20isozyme 201 2C 20putative 2C 20expressed	QTN	ISAH_WS2021
PH	LOC_Os11g38920	11	23171897	23176348	+	339864519	HVA22 2C 20putative 2C 20expressed	QTN, genic	ISAH_WS2021, WS21	_	BIP124	_	brassinosteroid receptor kinase (BRI1)-interacting protein 124, BRI1-interacting protein 124, brassinosteroid receptor kinase-interacting protein 124			Os11g0602300		GO:0016021 - integral to membrane
PH	LOC_Os11g38930	11	23176604	23178856	+	339864519	tRNA-splicing 20endonuclease 20subunit 20Sen2 2C 20putative 2C 20expressed	QTN	ISAH_WS2021
PH	LOC_Os11g38959	11	23184447	23187634	+	339864519	40S 20ribosomal 20protein 20S9-2 2C 20putative 2C 20expressed	QTN	ISAH_WS2021, IGKV_WS2021	_		_	Ribosomal protein 1024			Os11g0602600		GO:0015935 - small ribosomal subunit, GO:0019843 - rRNA binding, GO:0006412 - translation, GO:0003735 - structural constituent of ribosome
PH	LOC_Os11g38970	11	23189532	23190792	+	339864519	expressed 20protein	QTN	ISAH_WS2021, IGKV_WS2021
PH	LOC_Os11g38980	11	23194769	23197394	-	339864519	F-box 2FKelch-repeat 20protein 2C 20putative 2C 20expressed	QTN, nongenic	ISAH_WS2021, IGKV_WS2021, WS21
PH	LOC_Os11g38990	11	23212467	23217469	+	339864519	peptidyl-prolyl 20cis-trans 20isomerase 2C 20putative 2C 20expressed	QTN, nongenic	ISAH_WS2021, IGKV_WS2021, WS21	CYP23	OsCYP23, OsCYP-28, OsCYP23a, OsCYP23b, OsCYP23c	CYCLOPHILIN 23	cyclophilin 23, cyclophilin 28	CYCLOPHILIN 23	Biochemical character	Os11g0602900		GO:0000413 - protein peptidyl-prolyl isomerization, GO:0006457 - protein folding, GO:0003755 - peptidyl-prolyl cis-trans isomerase activity
PH	LOC_Os11g39000	11	23222907	23224224	+	339864519	helix-loop-helix 20DNA-binding 20domain 20containing 20protein 2C 20expressed	QTN	ISAH_WS2021, IGKV_WS2021	ILI2	OsILI2, OsbHLH186, bHLH186, ATAC2/ILI2, ATAC2, OsATAC2	INCREASED LEAF INCLINATION 2	Increased Leaf Inclination 2, basic helix-loop-helix protein 186, Alternative TalC Target locus 2		Tolerance and resistance - Stress tolerance, Character as QTL - Germination	Os11g0603000		GO:0009630 - gravitropism, GO:0003677 - DNA binding, GO:0009640 - photomorphogenesis, GO:0009826 - unidimensional cell growth, GO:0009741 - response to brassinosteroid stimulus, GO:0048510 - regulation of timing of transition from vegetative to reproductive phase, GO:0002237 - response to molecule of bacterial origin, GO:0009413 - response to flooding, GO:0009629 - response to gravity, GO:0009845…	TO:0002693 - gravity response trait, TO:0000524 - submergence tolerance	PO:0007057 - 0 seed germination stage , PO:0007045 - coleoptile emergence stage
PH	LOC_Os11g39010	11	23225322	23226629	-	339864519	expressed 20protein	QTN	ISAH_WS2021, IGKV_WS2021
PH	LOC_Os11g39020	11	23230112	23234077	+	339864519	ABC 20transporter 2C 20ATP-binding 20protein 2C 20putative 2C 20expressed	QTN	ISAH_WS2021, IGKV_WS2021	ABCF6	OsABCF6	ABC TRANSPORTER F FAMILY MEMBER 6	ABC transporter superfamily ABCF subgroup member 6	ABC TRANSPORTER F FAMILY MEMBER 6	Biochemical character	Os11g0603200		GO:0006200 - ATP catabolic process, GO:0009624 - response to nematode, GO:0005524 - ATP binding, GO:0016887 - ATPase activity
PH	LOC_Os11g39050	11	23249946	23250515	-	339864519	expressed 20protein	QTN	ISAH_WS2021, IGKV_WS2021
PH	LOC_Os11g39060	11	23252864	23253271	-	339864519	expressed 20protein	QTN, nongenic	ISAH_WS2021, IGKV_WS2021, WS21
PH	LOC_Os11g39070	11	23255786	23256256	-	339864519	expressed 20protein	QTN, nongenic	ISAH_WS2021, IGKV_WS2021, WS21
PH	LOC_Os11g39079	11	23260777	23262764	+	339864519	expressed 20protein	QTN	ISAH_WS2021, IGKV_WS2021
PH	LOC_Os11g39090	11	23263045	23263602	+	339864519	expressed 20protein	QTN	ISAH_WS2021, IGKV_WS2021
PH	LOC_Os11g39100	11	23271505	23272107	-	339864519	expressed 20protein	QTN	ISAH_WS2021, IGKV_WS2021
PH	LOC_Os11g39120	11	23283945	23284798	-	339974235	expressed 20protein	QTN, nongenic	IGKV_WS2021, WS20
PH	LOC_Os11g39130	11	23291054	23294563	+	339974235	zinc 20finger 2C 20C3HC4 20type 20family 20protein 2C 20expressed	QTN, nongenic	IGKV_WS2021, WS20	RING411	OsRING411	RING-TYPE E3 UBIQUITIN LIGASE 411	RING-type E3 ubiquitin ligase 411			Os11g0604600
PH	LOC_Os11g39140	11	23295112	23298744	+	339974235	thioredoxin 20domain-containing 20protein 209 2C 20putative 2C 20expressed	QTN	IGKV_WS2021
PH	LOC_Os11g39190	11	23333663	23337437	+	339974235	NB-ARC 20domain 20containing 20protein 2C 20putative 2C 20expressed	QTN	IGKV_WS2021
PH	LOC_Os11g39220	11	23354149	23358318	-	339974235	acyl-coenzyme 20A 20oxidase 2C 20putative 2C 20expressed	QTN	IGKV_WS2021	ACX2	OsACX2	ACYL-COA OXIDASE 2	acyl-CoA oxidase 2, acyl-coenzyme A oxidase 2	ACYL-COA OXIDASE 2	Tolerance and resistance - Stress tolerance, Biochemical character	Os11g0605500		GO:0003997 - acyl-CoA oxidase activity, GO:0001676 - long-chain fatty acid metabolic process, GO:0009269 - response to desiccation, GO:0009414 - response to water deprivation, GO:0016627 - oxidoreductase activity, acting on the CH-CH group of donors, GO:0005777 - peroxisome, GO:0006635 - fatty acid beta-oxidation	TO:0000507 - osmotic adjustment capacity, TO:0000276 - drought tolerance, TO:0000432 - temperature response trait	PO:0009010 - seed
PH	LOC_Os11g39230	11	23361134	23365917	-	339974235	retrotransposon 20protein 2C 20putative 2C 20unclassified 2C 20expressed	QTN	IGKV_WS2021
PH	LOC_Os11g39250	11	23368577	23373607	-	339974235	transposon 20protein 2C 20putative 2C 20unclassified 2C 20expressed	QTN	IGKV_WS2021
PH	LOC_Os11g39260	11	23377646	23378368	-	339974235	NBS-LRR 20disease 20resistance 20protein 2C 20putative 2C 20expressed	QTN	IGKV_WS2021
PH	LOC_Os11g39530	11	23537272	23545497	-	340307301	jacalin-like 20lectin 20domain 20containing 20protein 2C 20expressed	QTN	ISARC_WS2021	RLCK339	OsRLCK339, OsJRL25, JRL25	RECEPTOR-LIKE CYTOPLASMIC KINASE 339	Receptor-like Cytoplasmic Kinase 339, Jacalin-related lectin 25	RECEPTOR-LIKE CYTOPLASMIC KINASE 339		Os11g0609500		GO:0006468 - protein amino acid phosphorylation, GO:0005524 - ATP binding, GO:0004672 - protein kinase activity
PH	LOC_Os11g39540	11	23553560	23558464	-	340307301	14-3-3 20protein 2C 20putative 2C 20expressed	QTN	ISARC_WS2021	GF14H	GF14h, OsGF14h, 14-3-3h	G-BOX FACTOR 14-3-3H PROTEIN	G-box factor 14-3-3h protein		Reproductive organ - Heading date, Character as QTL - Germination	Os11g0609600		GO:0008104 - protein localization, GO:0009737 - response to abscisic acid stimulus, GO:0005783 - endoplasmic reticulum, GO:0005737 - cytoplasm, GO:0010030 - positive regulation of seed germination, GO:0007165 - signal transduction, GO:0009788 - negative regulation of abscisic acid mediated signaling	TO:0000430 - germination rate, TO:0000615 - abscisic acid sensitivity
PH	LOC_Os11g39550	11	23565236	23575489	-	340307301	Leucine 20Rich 20Repeat 20family 20protein 2C 20expressed	QTN	ISARC_WS2021
PH	LOC_Os11g39640	11	23610858	23612864	+	340307301	zinc 20finger 2C 20C3HC4 20type 20domain 20containing 20protein 2C 20expressed	QTN	ISARC_WS2021	RING333	OsRING333	RING-TYPE E3 UBIQUITIN LIGASE 333	RING-type E3 ubiquitin ligase 333			Os11g0610600
PH	LOC_Os11g39650	11	23615037	23619315	-	340307301	WD 20domain 2C 20G-beta 20repeat 20domain 20containing 20protein 2C 20expressed	QTN	ISARC_WS2021	WD40-190	OsWD40-190	WD40-REPEAT TRANSCRIPTION FACTOR 190	WD40-repeat transcription factor 190	WD40-REPEAT TRANSCRIPTION FACTOR 190	Vegetative organ - Leaf, Coloration - Anthocyanin	Os11g0610700		GO:0031540 - regulation of anthocyanin biosynthetic process	TO:0000326 - leaf color
PH	LOC_Os11g39660	11	23623013	23625543	+	340307301	transposon 20protein 2C 20putative 2C 20Ac 2FDs 20sub-class 2C 20expressed	QTN	ISARC_WS2021
PH	LOC_Os11g39670	11	23628182	23632588	+	340307301	seryl-tRNA 20synthetase 2C 20putative 2C 20expressed	QTN	ISARC_WS2021	TSCD11	OsTSCD11	TEMPERATURE-SENSITIVE CHLOROPHYLL-DEFICIENT 11	temperature-sensitive chlorophyll-deficient 11		Coloration - Chlorophyll, Vegetative organ - Leaf, Tolerance and resistance - Stress tolerance	Os11g0610900		GO:0005739 - mitochondrion, GO:0015995 - chlorophyll biosynthetic process, GO:0009408 - response to heat, GO:0009658 - chloroplast organization, GO:0005524 - ATP binding, GO:0070158 - mitochondrial seryl-tRNA aminoacylation, GO:0000049 - tRNA binding, GO:0004828 - serine-tRNA ligase activity, GO:0009507 - chloroplast, GO:0006434 - seryl-tRNA aminoacylation, GO:0048481 - ovule development, GO:0046…	TO:0000295 - chlorophyll-b content, TO:0000293 - chlorophyll-a content, TO:0000496 - carotenoid content, TO:0000069 - variegated leaf, TO:0000605 - hydrogen peroxide content, TO:0000207 - plant height, TO:0000040 - panicle length, TO:0000455 - seed set percent, TO:0000495 - chlorophyll content, TO:0000326 - leaf color, TO:0000259 - heat tolerance, TO:0002715 - chloroplast development trait, TO:00…	PO:0009005 - root , PO:0025034 - leaf , PO:0009047 - stem , PO:0020104 - leaf sheath
PH	LOC_Os11g39680	11	23635337	23636133	+	340307301	expressed 20protein	QTN	ISARC_WS2021
PH	LOC_Os11g39710	11	23651614	23653310	+	340307301	retrotransposon 20protein 2C 20putative 2C 20Ty3-gypsy 20subclass 2C 20expressed	QTN	ISARC_WS2021
PH	LOC_Os11g39720	11	23658490	23661169	+	340307301	retrotransposon 2C 20putative 2C 20centromere-specific 2C 20expressed	QTN	ISARC_WS2021
PH	LOC_Os11g39730	11	23675579	23678380	-	340307301	NB-ARC 20domain 20containing 20protein 2C 20expressed	QTN	ISARC_WS2021
PH	LOC_Os11g39740	11	23683394	23684597	+	340307301	expressed 20protein	QTN	ISARC_WS2021
PH	LOC_Os11g39770	11	23705284	23705921	-	340307301	expressed 20protein	QTN	ISARC_WS2021
PH	LOC_Os12g12980	12	7190284	7190833	+	352906574,352932564	hypothetical 20protein	nongenic	ISARC
PH	LOC_Os12g12990	12	7193916	7198615	+	352906574,352932564	transposon 20protein 2C 20putative 2C 20CACTA 2C 20En 2FSpm 20sub-class 2C 20expressed	nongenic	ISARC
PH	LOC_Os12g13020	12	7217431	7220865	+	352906574,352932564	transposon 20protein 2C 20putative 2C 20CACTA 2C 20En 2FSpm 20sub-class 2C 20expressed	genic	ISARC
PH	LOC_Os12g35750	12	21766844	21767266	-	367489942	expressed 20protein	nongenic	WS21
PH	LOC_Os12g35760	12	21776358	21777795	-	367489942	transposon 20protein 2C 20putative 2C 20unclassified 2C 20expressed	nongenic	WS21
PL	LOC_Os01g07280	1	3431606	3435618	-	3440283 , 3442424	disease 20resistance 20protein 2C 20putative 2C 20expressed	nongenic	WS20
PL	LOC_Os01g07300	1	3445159	3446607	+	3440283 , 3442424	uncharacterized 2050.6 20kDa 20protein 20in 20the 205region 20of 20gyrA 20and 20gyrB 2C 20putative 2C 20expressed	nongenic	WS20
PL	LOC_Os01g10450	1	5510516	5514480	-	5524273	protein 20kinase 20domain 20containing 20protein 2C 20expressed	nongenic	IGKV
PL	LOC_Os01g10460	1	5530497	5533609	+	5524273	expressed 20protein	nongenic	IGKV	DH	D-h(t)*, Dwf43, D-h	DOMINANT DWARF	Dominant dwarf		Seed - Morphological traits, Vegetative organ - Culm	Os01g0201275		GO:0009740 - gibberellic acid mediated signaling, GO:0007275 - multicellular organismal development	TO:0000287 - brown rice shape, TO:0000166 - gibberellic acid sensitivity, TO:0000397 - grain size, TO:0000207 - plant height, TO:0000040 - panicle length, TO:0000576 - stem length, TO:0002730 - grain shape, TO:0000391 - seed size, TO:0000145 - internode length	PO:0009049 - inflorescence , PO:0009047 - stem
PL	LOC_Os01g40180	1	22666117	22667013	-	22675053 , 22675452	expressed 20protein	nongenic	WS21
PL	LOC_Os01g40190	1	22675935	22678621	+	22675053 , 22675452	retrotransposon 20protein 2C 20putative 2C 20unclassified 2C 20expressed	nongenic	WS21
PL	LOC_Os02g11080	2	5935644	5936940	+	49220898,49212358	hypothetical 20protein	nongenic	ISARC
PL	LOC_Os02g11090	2	5943967	5946323	+	49220898,49212358	retrotransposon 20protein 2C 20putative 2C 20Ty3-gypsy 20subclass 2C 20expressed	nongenic	ISARC
PL	LOC_Os02g11100	2	5952319	5952699	+	49220898,49212358	expressed 20protein	nongenic	ISARC
PL	LOC_Os02g27830	2	16477199	16484046	-	59775260,59752727	expressed 20protein	genic	ISAH
PL	LOC_Os02g27880	2	16501756	16507241	+	59775260,59752727	EF 20hand 20family 20protein 2C 20expressed	genic	ISAH
PL	LOC_Os02g34260	2	20491113	20491868	-	63810980	AP2 20domain 20containing 20protein 2C 20expressed	QTN	ISARC_WS2021	ERF98	OsERF#098, OsERF098, OsERF98, AP2/EREBP#120, AP2/EREBP120	ETHYLENE RESPONSE FACTOR 98	ethylene response factor 98, APETALA2/ethylene-responsive element binding protein 120	ETHYLENE RESPONSE FACTOR 98	Other	Os02g0546600		GO:0003677 - DNA binding, GO:0005634 - nucleus, GO:0003700 - transcription factor activity, GO:0006351 - transcription, DNA-dependent
PL	LOC_Os02g34290	2	20517590	20518250	+	63810980	expressed 20protein	QTN	ISARC_WS2021
PL	LOC_Os02g34300	2	20519193	20526961	+	63810980	transposon 20protein 2C 20putative 2C 20unclassified 2C 20expressed	QTN	ISARC_WS2021
PL	LOC_Os02g34310	2	20529472	20530884	+	63810980	expressed 20protein	QTN	ISARC_WS2021
PL	LOC_Os02g34320	2	20535321	20538749	+	63810980,63806921	basic 20helix-loop-helix 2C 20putative 2C 20expressed	genic, QTN	ISARC, ISARC_WS2021	_	OsbHLH146, bHLH146, OsZOU-2, OsZOU2, ZOU-2, ZOU2	_	basic helix-loop-helix protein 146, ZHOUPI 2			Os02g0547600				PO:0009047 - stem , PO:0025034 - leaf
PL	LOC_Os02g34330	2	20542157	20543511	-	63810980,63806921	retrotransposon 20protein 2C 20putative 2C 20unclassified 2C 20expressed	nongenic, QTN	ISARC, ISARC_WS2021
PL	LOC_Os02g34340	2	20545118	20547480	+	63810980	retrotransposon 20protein 2C 20putative 2C 20Ty3-gypsy 20subclass 2C 20expressed	QTN	ISARC_WS2021
PL	LOC_Os02g34350	2	20549395	20554712	-	63810980	retrotransposon 20protein 2C 20putative 2C 20unclassified 2C 20expressed	QTN	ISARC_WS2021
PL	LOC_Os02g34360	2	20556755	20557495	+	63810980	expressed 20protein	QTN	ISARC_WS2021
PL	LOC_Os02g34370	2	20562533	20565664	+	63810980	expressed 20protein	QTN	ISARC_WS2021	_	OsbHLH147, bHLH147	_	basic helix-loop-helix protein 147			Os02g0548100		GO:0005634 - nucleus		PO:0009010 - seed
PL	LOC_Os02g34380	2	20572270	20575033	+	63810980	retrotransposon 20protein 2C 20putative 2C 20LINE 20subclass 2C 20expressed	QTN	ISARC_WS2021
PL	LOC_Os02g34390	2	20575963	20577744	-	63810980	expressed 20protein	QTN	ISARC_WS2021
PL	LOC_Os02g34400	2	20585602	20586171	-	63810980	expressed 20protein	QTN	ISARC_WS2021
PL	LOC_Os02g36830	2	22215057	22217951	+	65531953	cytokinin-O-glucosyltransferase 202 2C 20putative 2C 20expressed	QTN	ISAH_WS2021
PL	LOC_Os02g36840	2	22229412	22231714	+	65531953	cytokinin-O-glucosyltransferase 202 2C 20putative 2C 20expressed	QTN	ISAH_WS2021
PL	LOC_Os02g36860	2	22237014	22237403	-	65531953	expressed 20protein	QTN	ISAH_WS2021
PL	LOC_Os02g36870	2	22244988	22247595	+	65531953	YGL010w 2C 20putative 2C 20expressed	QTN	ISAH_WS2021
PL	LOC_Os02g36880	2	22258833	22260681	+	65531953	No 20apical 20meristem 20protein 2C 20putative 2C 20expressed	QTN, nongenic	ISAH_WS2021, WS21	NAC1	OsNAC1, ONAC027, ONAC27, NAC27, OMTN1, OsNAC1/ONAC027, DLN60, OsDLN60, OsORE1	NAC DOMAIN-CONTAINING PROTEIN 1	NAC domain-containing protein 027, NAC domain-containing protein 27, Oryza miR164-targeted NAC1, miR164-targeted NAC1, DLN repressor 60, DLN motif protein 60	NAC DOMAIN-CONTAINING PROTEIN 1	Other, Character as QTL - Germination, Tolerance and resistance - Stress tolerance	Os02g0579000		GO:0009409 - response to cold, GO:0006355 - regulation of transcription, DNA-dependent, GO:0003677 - DNA binding, GO:0009413 - response to flooding, GO:0009629 - response to gravity, GO:0045449 - regulation of transcription, GO:0005634 - nucleus, GO:0006350 - transcription, GO:0009651 - response to salt stress, GO:0009845 - seed germination	TO:0000276 - drought tolerance, TO:0000303 - cold tolerance, TO:0006001 - salt tolerance, TO:0002693 - gravity response trait, TO:0000524 - submergence tolerance	PO:0007057 - 0 seed germination stage , PO:0007045 - coleoptile emergence stage
PL	LOC_Os02g36890	2	22267920	22270242	+	65531953	MYB 20family 20transcription 20factor 2C 20putative 2C 20expressed	QTN, nongenic	ISAH_WS2021, WS21	2R_MYB24	Os2R_MYB24	R2R3-MYB TRANSCRIPTION FACTOR 24	R2R3-MYB Transcription Factor 24	R2R3-MYB TRANSCRIPTION FACTOR 24		Os02g0579300		GO:0003677 - DNA binding
PL	LOC_Os02g36924	2	22294657	22301808	+	65531953	OsMADS27 20- 20MADS-box 20family 20gene 20with 20MIKCc 20type-box 2C 20expressed	QTN, nongenic	ISAH_WS2021, WS21	MADS27	OsMADS27, MADS-27a, OsSTA66, OsMADS27a	MADS BOX GENE 27	MADS box gene27, MADS-box transcription factor 27	MADS-BOX TRANSCRIPTION FACTOR 27	Tolerance and resistance - Stress tolerance, Vegetative organ - Root, Tolerance and resistance - Disease resistance, Reproductive organ - Spikelet, flower, glume, awn, Other, Character as QTL - Yield and productivity	Os02g0579600		GO:0005634 - nucleus, GO:0010167 - response to nitrate, GO:0043565 - sequence-specific DNA binding, GO:0009742 - brassinosteroid mediated signaling, GO:0048364 - root development, GO:0060359 - response to ammonium ion, GO:0051607 - defense response to virus, GO:0010423 - negative regulation of brassinosteroid biosynthetic process, GO:0006350 - transcription, GO:0009651 - response to salt stress, …	TO:0000449 - grain yield per plant, TO:0006001 - salt tolerance, TO:0000227 - root length, TO:0000152 - panicle number, TO:0000440 - grain number per plant, TO:0000547 - primary branch number, TO:0000346 - tiller number, TO:0000656 - root development trait, TO:0000168 - abiotic stress trait, TO:0000148 - viral disease resistance, TO:0002676 - brassinosteroid content, TO:0000396 - grain yield, TO:…	PO:0020124 - root stele , PO:0009005 - root , PO:0007520 - root development stage , PO:0009066 - anther , PO:0025034 - leaf , PO:0020104 - leaf sheath
PL	LOC_Os02g36940	2	22311833	22313162	-	65572879 , 65531953	uncharacterized 20Cys-rich 20domain 20containing 20protein 2C 20putative 2C 20expressed	nongenic	WS21	FWL2	OsFWL2, OsPCR1, PCR1, OsFWL1, FWL1	FRUIT-WEIGHT2.2-LIKE 2	FW2.2-like 2, plant cadmium resistance protein 1, FW2.2-Like 1	FRUIT-WEIGHT2.2-LIKE 2	Tolerance and resistance - Stress tolerance	Os02g0579800		GO:0046686 - response to cadmium ion, GO:0005886 - plasma membrane	TO:0000605 - hydrogen peroxide content
PL	LOC_Os02g40480	2	24545445	24548588	-	67820943 , 67820962	transposon 20protein 2C 20putative 2C 20unclassified 2C 20expressed	nongenic	WS20
PL, GY	LOC_Os02g41480	2	24862203	24864799	-	68180684, 68116921,68132084	OsWAK12 20- 20OsWAK 20receptor-like 20cytoplasmic 20kinase 20OsWAK-RLCK 2C 20expressed	QTN, nongenic	ISARC_WS2021, ISAH, WS20	WAK12	OsWAK12, OsRLCK75, RLCK75	WALL-ASSOCIATED KINASE GENE 12	Receptor-like Cytoplasmic Kinase 75	WALL-ASSOCIATED KINASE 12	Biochemical character	Os02g0623600		GO:0004674 - protein serine/threonine kinase activity, GO:0005524 - ATP binding
PL	LOC_Os02g41490	2	24866771	24867775	-	68180684	expressed 20protein	QTN	ISARC_WS2021
PL, GY	LOC_Os02g41500	2	24871746	24874211	-	68180684, 68146801 , 68132084	OsWAK13 20- 20OsWAK 20receptor-like 20protein 20kinase 2C 20expressed	QTN, nongenic	ISARC_WS2021, WS20	WAK13	OsWAK13	WALL-ASSOCIATED KINASE GENE 13		WALL-ASSOCIATED KINASE 13	Biochemical character	Os02g0623932/Os02g0624100		GO:0006468 - protein amino acid phosphorylation, GO:0005886 - plasma membrane, GO:0005509 - calcium ion binding, GO:0004674 - protein serine/threonine kinase activity, GO:0007166 - cell surface receptor linked signal transduction, GO:0030247 - polysaccharide binding, GO:0016020 - membrane, GO:0005524 - ATP binding
PL	LOC_Os02g41520	2	24899523	24905062	+	68180684	glycosyl 20transferase 208 20domain 20containing 20protein 2C 20putative 2C 20expressed	QTN	ISARC_WS2021	PGSIP-B1	OsPGSIP-B1	PLANT GLYCOGENIN-LIKE STARCH INITIATION PROTEIN B1	plant glycogenin-like starch initiation protein B1	PLANT GLYCOGENIN-LIKE STARCH INITIATION PROTEIN B1		Os02g0624400		GO:0016021 - integral to membrane
PL	LOC_Os02g41550	2	24915862	24922099	+	68180684	FAD 20binding 20domain 20of 20DNA 20photolyase 20domain 20containing 20protein 2C 20expressed	QTN	ISARC_WS2021	CRY2	OsCRY2	CRYPTOCHROME 2	cryptochrome 2	CRYPTOCHROME 2	Vegetative organ - Leaf, Tolerance and resistance - Stress tolerance, Reproductive organ - Spikelet, flower, glume, awn	Os02g0625000	101.2	GO:0006281 - DNA repair, GO:0009648 - photoperiodism, GO:0003913 - DNA photolyase activity, GO:0009881 - photoreceptor activity, GO:0009637 - response to blue light, GO:0010224 - response to UV-B, GO:0009908 - flower development, GO:0009740 - gibberellic acid mediated signaling, GO:0051510 - regulation of unidimensional cell growth, GO:0009785 - blue light signaling pathway	TO:0002675 - gibberellic acid content, TO:0000601 - UV-B light sensitivity, TO:0002689 - leaf sheath length, TO:0000159 - blue light sensitivity	PO:0007615 - flower development stage
PL	LOC_Os02g41560	2	24923868	24925349	+	68180684	pentatricopeptide 2C 20putative 2C 20expressed	QTN	ISARC_WS2021
PL	LOC_Os02g41570	2	24929804	24930299	-	68180684	expressed 20protein	QTN	ISARC_WS2021
PL	LOC_Os02g41580	2	24934934	24936468	+	68180684	CAMK_CAMK_like.14 20- 20CAMK 20includes 20calcium 2Fcalmodulin 20depedent 20protein 20kinases 2C 20expressed	QTN	ISARC_WS2021	PPCK2	OsPPCK2, OsPPCK2L, OsPPCK2S	PHOSPHOENOL PYRUVATE CARBOXYLASE KINASE2	phosphoenol pyruvate carboxylase kinase2, phosphoenolpyruvate carboxylase kinase 2	PHOSPHOENOL PYRUVATE CARBOXYLASE KINASE2	Biochemical character, Tolerance and resistance - Stress tolerance	Os02g0625300		GO:0004674 - protein serine/threonine kinase activity, GO:0006468 - protein amino acid phosphorylation, GO:0005515 - protein binding, GO:0005524 - ATP binding, GO:0009414 - response to water deprivation	TO:0000276 - drought tolerance
PL	LOC_Os02g41590	2	24940446	24946648	-	68180684	kinase 2C 20pfkB 20family 2C 20putative 2C 20expressed	QTN	ISARC_WS2021	_		_	Adenosine kinase		Biochemical character	Os02g0625500		GO:0006144 - purine base metabolic process, GO:0005524 - ATP binding, GO:0004001 - adenosine kinase activity, GO:0005634 - nucleus, GO:0005829 - cytosol, GO:0006166 - purine ribonucleoside salvage, GO:0016310 - phosphorylation
PL	LOC_Os02g41610	2	24953147	24960258	+	68180684	expressed 20protein	QTN	ISARC_WS2021
PL	LOC_Os02g47970	2	29341254	29357891	+	72659733	calpain 2C 20putative 2C 20expressed	QTN	IGKV_WS2021	ADL1	OsADL1	ADAXIALIZED LEAF 1	adaxialized leaf-1, ADAXIALIZED LEAF1, shootless 3, Dek1-calpain-like protein		Vegetative organ - Leaf, Biochemical character	Os02g0709400		GO:0001708 - cell fate specification, GO:0004198 - calcium-dependent cysteine-type endopeptidase activity, GO:0005622 - intracellular, GO:0005886 - plasma membrane, GO:0006508 - proteolysis, GO:0007275 - multicellular organismal development, GO:0009955 - adaxial/abaxial pattern formation	TO:0000576 - stem length, TO:0000085 - leaf rolling, TO:0000492 - leaf shape	PO:0009025 - vascular leaf , PO:0009047 - stem
PL	LOC_Os02g47990	2	29366201	29367537	+	72659733	retrotransposon 20protein 2C 20putative 2C 20unclassified 2C 20expressed	QTN	IGKV_WS2021
PL	LOC_Os02g48000	2	29373018	29381091	-	72659733	TBC 20domain 20containing 20protein 2C 20expressed	QTN	IGKV_WS2021	GAP1	OsGAP1	GTPASE-ACTIVATING PROTEIN 1	GTPase-activating protein 1	GTPASE-ACTIVATING PROTEIN 1	Tolerance and resistance - Stress tolerance	Os02g0709800		GO:0009651 - response to salt stress, GO:0006970 - response to osmotic stress, GO:0005097 - Rab GTPase activator activity, GO:0005622 - intracellular, GO:0032851 - positive regulation of Rab GTPase activity	TO:0000095 - osmotic response sensitivity, TO:0006001 - salt tolerance
PL	LOC_Os02g48010	2	29382376	29388559	-	72659733	nuclear 20matrix 20constituent 20protein 201-like 2C 20putative 2C 20expressed	QTN	IGKV_WS2021	_	OsNMCP1a	_	nuclear matrix protein NMCP1a			Os02g0709900		GO:0005829 - cytosol, GO:0006997 - nucleus organization, GO:0005652 - nuclear lamina
PL	LOC_Os02g48020	2	29396130	29396617	-	72659733	expressed 20protein	QTN	IGKV_WS2021
PL	LOC_Os02g48030	2	29400324	29401373	-	72659733	expressed 20protein	QTN	IGKV_WS2021
PL	LOC_Os02g48040	2	29405263	29407035	-	72659733	expressed 20protein	QTN	IGKV_WS2021
PL	LOC_Os02g48050	2	29415150	29416743	+	72659733	hypothetical 20protein	QTN	IGKV_WS2021
PL	LOC_Os02g48060	2	29421401	29422989	+	72659733	helix-loop-helix 20DNA-binding 20domain 20containing 20protein 2C 20expressed	QTN	IGKV_WS2021	_	OsbHLH126, bHLH126, OsRSL2, RSL2	_	basic helix-loop-helix protein 126, ROOT HAIR DEFECTIVE-SIX LIKE 2		Vegetative organ - Root	Os02g0710300		GO:0048765 - root hair cell differentiation, GO:0048767 - root hair elongation	TO:0002665 - root hair length
PL	LOC_Os02g48070	2	29427009	29427293	-	72659733	expressed 20protein	QTN	IGKV_WS2021
PL	LOC_Os02g48080	2	29429761	29432460	+	72659733	cysteine-rich 20receptor-like 20protein 20kinase 207 20precursor 2C 20putative 2C 20expressed	QTN	IGKV_WS2021	ECK1	OsECK1	EXTRACELLULAR KINASE 1	receptor protein kinase, Extracellular kinase-1	EXTRACELLULAR KINASE 1	Tolerance and resistance - Disease resistance, Tolerance and resistance - Stress tolerance, Biochemical character	Os02g0710500		GO:0009414 - response to water deprivation, GO:0004674 - protein serine/threonine kinase activity, GO:0006468 - protein amino acid phosphorylation, GO:0051607 - defense response to virus, GO:0050832 - defense response to fungus, GO:0009413 - response to flooding, GO:0005524 - ATP binding, GO:0030912 - response to deep water, GO:0002237 - response to molecule of bacterial origin, GO:0016021 - inte…	TO:0000148 - viral disease resistance, TO:0000255 - sheath blight disease resistance, TO:0000524 - submergence tolerance, TO:0000276 - drought tolerance	PO:0009005 - root
PL	LOC_Os02g48090	2	29434027	29434611	-	72659733	expressed 20protein	QTN	IGKV_WS2021
PL	LOC_Os02g48330	2	29586938	29591991	-	72911779	3-hydroxy-3-methylglutaryl-coenzyme 20A 20reductase 2C 20putative 2C 20expressed	QTN	IGKV_WS2020	HMGRI	HMGR I, OsHMGRI, Hmg1, HMGR1, HMGR 1, OsHMGR1	3-HYDROXY-3-METHYLGLUTARYL COENZYME A REDUCTASE I	3-hydroxy-3-methylglutaryl coenzyme A reductase I, 3-hydroxy-3-methylglutaryl-CoA reductase 1, HMG-CoA reductase 1	3-HYDROXY-3-METHYLGLUTARYL COENZYME A REDUCTASE I	Tolerance and resistance - Stress tolerance, Biochemical character, Tolerance and resistance - Disease resistance	Os02g0713900		GO:0015936 - coenzyme A metabolic process, GO:0005789 - endoplasmic reticulum membrane, GO:0009416 - response to light stimulus, GO:0050661 - NADP or NADPH binding, GO:0004420 - hydroxymethylglutaryl-CoA reductase (NADPH) activity, GO:0016021 - integral to membrane, GO:0008299 - isoprenoid biosynthetic process	TO:0000674 - phytochemical compound content, TO:0000074 - blast disease, TO:0000075 - light sensitivity
PL	LOC_Os02g48340	2	29594605	29598901	+	72911779	RNA 20recognition 20motif 20containing 20protein 2C 20putative 2C 20expressed	QTN	IGKV_WS2020
PL	LOC_Os02g48350	2	29598974	29601846	-	72911779	diacylglycerol 20O-acyltransferase 2C 20putative 2C 20expressed	QTN	IGKV_WS2020	_	OsDGAT	_	diacylglycerolacetyl transferase		Biochemical character	Os02g0714100		GO:0019432 - triglyceride biosynthetic process, GO:0016747 - transferase activity, transferring acyl groups other than amino-acyl groups
PL	LOC_Os02g48360	2	29604449	29610243	-	72911779	pyrophosphate--fructose 206-phosphate 201-phosphotransferase 20subunit 20alpha 2C 20putative 2C 20expressed	QTN	IGKV_WS2020	PFPA1	OsPFPA1, OsPFP1a1, PFP1a1	PYROPHOSPHATE-FRUCTOSE-6-PHOSPHATEPHOSPHOTRANSFERASE ALPHA SUBUNIT 1	pyrophosphate-fructose-6-phosphatephosphotransferase alpha subunit 1, PFP-alpha subunit 1, catalytic a-subunit 1 of PFP1	PYROPHOSPHATE-FRUCTOSE-6-PHOSPHATEPHOSPHOTRANSFERASE ALPHA SUBUNIT 1	Tolerance and resistance - Stress tolerance, Biochemical character	Os02g0714200		GO:0006096 - glycolysis, GO:0034059 - response to anoxia, GO:0046872 - metal ion binding, GO:0003872 - 6-phosphofructokinase activity, GO:0005524 - ATP binding, GO:0005737 - cytoplasm, GO:0005829 - cytosol, GO:0047334 - diphosphate-fructose-6-phosphate 1-phosphotransferase activity	TO:0000248 - primary macronutrient sensitivity
PL	LOC_Os02g48370	2	29611156	29616291	-	72911779	ARID 2FBRIGHT 20DNA-binding 20domain-containing 20protein 2C 20putative 2C 20expressed	QTN	IGKV_WS2020	ARID2	OsSTA71, OsARID	AT-RICH INTERACTION DOMAIN-CONTAINING PROTEIN 2	AT-rich Interaction Domain-containing protein 2, AT-Rich Interaction Domain-containing transcription factor 2, ARID-containing transcription factor 2, ARID transcription factor 2	AT-RICH INTERACTION DOMAIN-CONTAINING PROTEIN 2	Reproductive organ - Spikelet, flower, glume, awn, Tolerance and resistance - Insect resistance	Os02g0714300		GO:0002213 - defense response to insect, GO:0003677 - DNA binding	TO:0000424 - brown planthopper resistance	PO:0009066 - anther
PL	LOC_Os02g48380	2	29618530	29624464	+	72911779	expressed 20protein	QTN	IGKV_WS2020
PL	LOC_Os02g48390	2	29625456	29628118	+	72911779	phosphoribosyl 20transferase 2C 20putative 2C 20expressed	QTN	IGKV_WS2020
PL	LOC_Os02g48400	2	29635857	29639351	+	72911779	expressed 20protein	QTN, nongenic	IGKV_WS2020, WS20
PL	LOC_Os02g48410	2	29645267	29648507	+	72911779	retrotransposon 20protein 2C 20putative 2C 20unclassified 2C 20expressed	nongenic	WS20
PL	LOC_Os02g48430	2	29657342	29659914	+	72911779	expressed 20protein	QTN	IGKV_WS2020
PL	LOC_Os02g48440	2	29664164	29664463	-	72911779	expressed 20protein	QTN	IGKV_WS2020
PL	LOC_Os02g48450	2	29667743	29669662	+	72911779	xylem 20cysteine 20proteinase 202 20precursor 2C 20putative 2C 20expressed	QTN	IGKV_WS2020	_		_	Xylem Cys proteinase 2			Os02g0715000		GO:0006508 - proteolysis, GO:0010623 - developmental programmed cell death, GO:0000325 - plant-type vacuole, GO:0005634 - nucleus, GO:0008234 - cysteine-type peptidase activity, GO:0005618 - cell wall
PL	LOC_Os02g48460	2	29670766	29674405	+	72911779	NAD 20dependent 20epimerase 2Fdehydratase 20family 20protein 2C 20putative 2C 20expressed	QTN, genic	IGKV_WS2020, WS20
PL	LOC_Os02g48490	2	29685288	29686211	-	72911779	expressed 20protein	QTN	IGKV_WS2020
PL	LOC_Os02g48500	2	29690107	29690586	-	72911779	hypothetical 20protein	QTN	IGKV_WS2020
PL	LOC_Os02g48720	2	29821936	29825336	+	73132939	mitochondrial 20carrier 20protein 2C 20putative 2C 20expressed	QTN	IGKV_WS2021	ANT	ant, ricANC1, ANC1	ADENOSINE NUCLEOTIDE TRANSLOCATOR	adenine nucleotide translocator, \ADP, ATP carrier protein, mitochondrial precursor\", \"ADP, ATP carrier protein, mitochondrial\", ADP/ATP translocase, ATP/ADP translocator"	ADENOSINE NUCLEOTIDE TRANSLOCATOR	Biochemical character	Os02g0718900		GO:0015616 - DNA translocase activity, GO:0005743 - mitochondrial inner membrane, GO:0016021 - integral to membrane, GO:0005215 - transporter activity, GO:0006810 - transport, GO:0016020 - membrane, GO:0005488 - binding, GO:0055085 - transmembrane transport, GO:0000295 - adenine nucleotide transmembrane transporter activity
PL	LOC_Os02g48730	2	29827457	29830453	+	73132939	rho 20GDP-dissociation 20inhibitor 201 2C 20putative 2C 20expressed	QTN	IGKV_WS2021	RHOGDI3	OsRhoGDI3, RhoGDI3, OsGDI8, GDI8	RHO-SPECIFIC GDP DISSOCIATION INHIBITOR 3	guanine nucleotide-dissociation inhibitor 8, GDP DISSOCIATION INHIBITOR 8	RHO-SPECIFIC GDP DISSOCIATION INHIBITOR 3		Os02g0719000		GO:0005094 - Rho GDP-dissociation inhibitor activity, GO:0016020 - membrane, GO:0005737 - cytoplasm, GO:0005829 - cytosol, GO:0007266 - Rho protein signal transduction
PL	LOC_Os02g48740	2	29833245	29838043	+	73132939	fimbrin-like 20protein 202 2C 20putative 2C 20expressed	QTN	IGKV_WS2021
PL	LOC_Os02g48750	2	29844589	29845233	+	73132939	expressed 20protein	QTN	IGKV_WS2021
PL	LOC_Os02g48770	2	29850372	29852551	+	73132939	SAM 20dependent 20carboxyl 20methyltransferase 2C 20putative 2C 20expressed	QTN	IGKV_WS2021	JMT2	JMT-2, OsJMT-2, OsJMT2	JASMONIC ACID CARBOXY METHYL TRANSFERASE 2	JA carboxy methyl transferase 2, jasmonic acid carboxy methyl transferase 2	JASMONIC ACID CARBOXY METHYL TRANSFERASE 2	Biochemical character	Os02g0719600		GO:0008168 - methyltransferase activity, GO:0008757 - S-adenosylmethionine-dependent methyltransferase activity, GO:0032259 - methylation
PL	LOC_Os02g48790	2	29859237	29867453	+	73132939	AML1 2C 20putative 2C 20expressed	QTN	IGKV_WS2021
PL	LOC_Os02g48800	2	29867969	29869430	+	73132939	PHD 20finger 20family 20protein 2C 20putative 2C 20expressed	QTN	IGKV_WS2021
PL	LOC_Os02g48810	2	29871368	29875355	+	73132939	PHD-finger 20family 20protein 2C 20expressed	QTN	IGKV_WS2021	PHD10	OsPHD10	PHD FINGER PROTEIN 10	Plant homeo-domain finger protein 10, PHD finger protein 10	PHD FINGER PROTEIN 10		Os02g0720000
PL	LOC_Os02g48820	2	29875563	29876705	-	73132939	plastocyanin-like 20domain 20containing 20protein 2C 20putative 2C 20expressed	QTN	IGKV_WS2021	ENODL8	OsENODL8	EARLY NODULIN LIKE PROTEIN 8	early nodulin-like protein 8	EARLY NODULIN LIKE PROTEIN 8	Biochemical character	Os02g0720100		GO:0005507 - copper ion binding, GO:0016021 - integral to membrane, GO:0009055 - electron carrier activity, GO:0046658 - anchored to plasma membrane
PL	LOC_Os02g48830	2	29877249	29881458	+	73132939	microtubule 20associated 20protein 2C 20putative 2C 20expressed	QTN	IGKV_WS2021	_		_	microtubule-associated protein 65 family, MT-associated protein 65 family, MAP65 gene family			Os02g0720200		GO:0005737 - cytoplasm, GO:0005819 - spindle, GO:0000226 - microtubule cytoskeleton organization, GO:0008017 - microtubule binding, GO:0000911 - cytokinesis by cell plate formation
PL	LOC_Os02g48840	2	29882066	29885249	+	73132939	dual 20specificity 20protein 20phosphatase 2C 20putative 2C 20expressed	QTN	IGKV_WS2021	_	OsPP38	_	Protein phosphatase 38			Os02g0720300		GO:0004725 - protein tyrosine phosphatase activity, GO:0005634 - nucleus, GO:0006470 - protein amino acid dephosphorylation, GO:0008138 - protein tyrosine/serine/threonine phosphatase activity, GO:0043407 - negative regulation of MAP kinase activity
PL	LOC_Os02g48860	2	29889275	29891337	+	73132939	aspartic 20proteinase 20nepenthesin-2 20precursor 2C 20putative 2C 20expressed	QTN	IGKV_WS2021
PL	LOC_Os02g48870	2	29892392	29894313	-	73132939	aspartic 20proteinase 20nepenthesin-2 20precursor 2C 20putative 2C 20expressed	QTN	IGKV_WS2021
PL	LOC_Os02g48880	2	29899248	29904080	-	73132939	chloride 20transporter 2C 20chloride 20channel 20family 2C 20putative 2C 20expressed	QTN	IGKV_WS2021	CBSCLC9	OsCBSCLC9, OsCBSCLC9a, OsCBSCLC9b	CYSTATHIONINE B-SYNTHASE DOMAIN CONTAINING CHLORIDE CHANNEL PROTEIN 9	cystathionine b-synthase domain containing protein OsCBSCLC9, CBS domain containing protein OsCBSCLC9, CBS domain containing protein 9	CYSTATHIONINE B-SYNTHASE DOMAIN CONTAINING CHLORIDE CHANNEL PROTEIN 9	Tolerance and resistance - Stress tolerance, Biochemical character	Os02g0720700		GO:0009507 - chloroplast, GO:0005794 - Golgi apparatus, GO:0005247 - voltage-gated chloride channel activity, GO:0003824 - catalytic activity, GO:0034059 - response to anoxia, GO:0001666 - response to hypoxia, GO:0016021 - integral to membrane, GO:0008152 - metabolic process	TO:0000015 - oxygen sensitivity
PL	LOC_Os02g48900	2	29911310	29916317	+	73132939	aspartic 20proteinase 20nepenthesin-1 20precursor 2C 20putative 2C 20expressed	QTN	IGKV_WS2021
PL	LOC_Os02g48964	2	29934369	29941648	-	73261239	WD-40 20repeat 20family 20protein 2C 20putative 2C 20expressed	QTN	IGKV_WS2021	SRWD2	SRWD2, OsWD40-52	SALT RESPONSIVE WD40 PROTEIN 2	salt responsive WD40 protein 2	SALT RESPONSIVE WD40 PROTEIN 2	Tolerance and resistance - Stress tolerance	Os02g0721600		GO:0009651 - response to salt stress
PL	LOC_Os02g48980	2	29947191	29949582	-	73261239	GPI-anchored 20protein 2C 20putative 2C 20expressed	QTN	IGKV_WS2021
PL	LOC_Os02g48990	2	29950661	29956825	-	73261239	phosphatidylinositol 20transfer 2C 20putative 2C 20expressed	QTN	IGKV_WS2021	SNDP8	OsSNDP8, OsSec14-9, Sec14-9	SEC14-NODULIN DOMAIN PROTEIN 8	Sec14-nodulin domain-containing protein 8, Sec14-nodulin domain protein 8, SEC14 domain protein 9, Sec14 protein 9	SEC14-NODULIN DOMAIN PROTEIN 8		Os02g0721800
PL	LOC_Os02g49010	2	29973088	29974702	-	73261239	retrotransposon 20protein 2C 20putative 2C 20Ty3-gypsy 20subclass	QTN	IGKV_WS2021
PL	LOC_Os02g49020	2	29975081	29975755	-	73261239	retrotransposon 20protein 2C 20putative 2C 20Ty3-gypsy 20subclass	QTN	IGKV_WS2021
PL	LOC_Os02g49040	2	29979798	29982734	+	73261239	CAMK_CAMK_like_unique.1 20- 20CAMK 20includes 20calcium 2Fcalmodulin 20depedent 20protein 20kinases 2C 20expressed	QTN	IGKV_WS2021
PL	LOC_Os02g49050	2	29984554	29987659	+	73261239	transmembrane 209 20superfamily 20member 2C 20putative 2C 20expressed	QTN	IGKV_WS2021
PL	LOC_Os02g49060	2	29991786	29998805	+	73261239	amino 20acid 20transporter 2C 20putative 2C 20expressed	QTN	IGKV_WS2021	AAP7C	OsAAP7C, OsAAP10, AAP10	AMINO ACID PERMEASE 7C	amino acid permease 7C, amino acid permease 10, amino acid/auxin permease 10	AMINO ACID PERMEASE 7C	Biochemical character	Os02g0722400		GO:0016021 - integral to membrane, GO:0005886 - plasma membrane, GO:0015171 - amino acid transmembrane transporter activity
PL	LOC_Os02g49070	2	29997568	30002813	-	73261239	ZAC 2C 20putative 2C 20expressed	QTN	IGKV_WS2021	C2DP23	OsC2DP23	C2 DOMAIN-CONTAINING PROTEIN 23	C2 Domain-Containing Protein 23	C2 DOMAIN-CONTAINING PROTEIN 23		Os02g0722500		GO:0005096 - GTPase activator activity, GO:0005543 - phospholipid binding
PL	LOC_Os02g49080	2	30011066	30015639	+	73261239	KH 20domain 20containing 20protein 2C 20putative 2C 20expressed	QTN	IGKV_WS2021
PL	LOC_Os02g49090	2	30015996	30025935	-	73261239	WD 20domain 2C 20G-beta 20repeat 20domain 20containing 20protein 2C 20expressed	QTN	IGKV_WS2021	_	OsWD40-53, OsDWD23, DWD23	_	DWD motif- containing protein 23			Os02g0722800		GO:0009965 - leaf morphogenesis, GO:0005829 - cytosol, GO:0005634 - nucleus, GO:0031087 - deadenylation-independent decapping of nuclear-transcribed mRNA, GO:0000932 - cytoplasmic mRNA processing body
PL	LOC_Os02g49100	2	30026255	30029907	-	73261239	retrotransposon 20protein 2C 20putative 2C 20unclassified	QTN	IGKV_WS2021
PL	LOC_Os02g49110	2	30031954	30033105	-	73261239	retrotransposon 20protein 2C 20putative 2C 20unclassified 2C 20expressed	QTN	IGKV_WS2021
PL	LOC_Os02g49120	2	30034696	30039832	-	73261239	retrotransposon 20protein 2C 20putative 2C 20unclassified 2C 20expressed	QTN	IGKV_WS2021
PL	LOC_Os02g53670	2	32827841	32832774	+	76145191	MYB 20family 20transcription 20factor 2C 20putative 2C 20expressed	QTN	IGKV_WS2021	TRFL1	OsTRFL1	TELOMERE REPEAT-BINDING FACTOR LIKE 1	telomere repeat-binding factor like 1	TELOMERE REPEAT-BINDING FACTOR LIKE 1	Reproductive organ - Pollination, fertilization, fertility - Sterility	Os02g0776700		GO:0032502 - developmental process, GO:0003677 - DNA binding, GO:0000723 - telomere maintenance	TO:0000485 - sterility related trait	PO:0009006 - shoot system , PO:0009010 - seed , PO:0005052 - plant callus , PO:0025034 - leaf
PL	LOC_Os02g53690	2	32840362	32842456	-	76145191	growth 20regulating 20factor 20protein 2C 20putative 2C 20expressed	QTN	IGKV_WS2021	GRF1	OsGRF1	GROWTH-REGULATING FACTOR 1	growth-regulating factor1	GROWTH-REGULATING FACTOR 1	Biochemical character, Seed - Morphological traits - Grain shape, Tolerance and resistance - Disease resistance, Tolerance and resistance - Stress tolerance, Vegetative organ - Leaf	Os02g0776900		GO:0009414 - response to water deprivation, GO:0009733 - response to auxin stimulus, GO:0009739 - response to gibberellin stimulus, GO:0009651 - response to salt stress, GO:0009741 - response to brassinosteroid stimulus, GO:0050832 - defense response to fungus, GO:0016563 - transcription activator activity, GO:0042127 - regulation of cell proliferation, GO:0009411 - response to UV, GO:0009408 - r…	TO:0000259 - heat tolerance, TO:0002637 - leaf size, TO:0000163 - auxin sensitivity, TO:0000074 - blast disease, TO:0000166 - gibberellic acid sensitivity, TO:0000615 - abscisic acid sensitivity, TO:0006001 - salt tolerance, TO:0000276 - drought tolerance, TO:0000397 - grain size, TO:0000734 - grain length, TO:0000492 - leaf shape, TO:0000592 - 1000-dehulled grain weight, TO:0000160 - UV light se…	PO:0000017 - vascular leaf primordium , PO:0009009 - plant embryo , PO:0000037 - shoot apex , PO:0025034 - leaf , PO:0009049 - inflorescence , PO:0020148 - shoot apical meristem
PL	LOC_Os02g53700	2	32858150	32870408	-	76145191	DENN 20domain 20containing 20protein 2C 20expressed	QTN	IGKV_WS2021
PL	LOC_Os02g53730	2	32890801	32891904	+	76145191	expressed 20protein	QTN	IGKV_WS2021
PL	LOC_Os02g53740	2	32904581	32913772	+	76145191	XI-I 2C 20putative 2C 20expressed	QTN	IGKV_WS2021	_		_	myosin XI			Os02g0777700		GO:0003779 - actin binding, GO:0005524 - ATP binding, GO:0005516 - calmodulin binding, GO:0003774 - motor activity, GO:0007015 - actin filament organization, GO:0030048 - actin filament-based movement, GO:0016459 - myosin complex
PL	LOC_Os03g25140	3	14359330	14370739	+	93625753	peptidyl-prolyl 20isomerase 20PASTICCINO1 2C 20putative 2C 20expressed	QTN	ISAH_WS2021	_	OsFKBP72	_	FK506 binding protein 72	_	Biochemical character	Os03g0367000		GO:0009735 - response to cytokinin stimulus, GO:0005783 - endoplasmic reticulum, GO:0009826 - unidimensional cell growth, GO:0030154 - cell differentiation, GO:0003755 - peptidyl-prolyl cis-trans isomerase activity, GO:0016020 - membrane, GO:0042761 - very-long-chain fatty acid biosynthetic process, GO:0005528 - FK506 binding, GO:0006457 - protein folding, GO:0048527 - lateral root development, G…
PL	LOC_Os03g25150	3	14381298	14387811	+	93625753	transposon 20protein 2C 20putative 2C 20unclassified 2C 20expressed	QTN	ISAH_WS2021	CYP75A11	OsCYP75A11, OsF3'5'H, F3'5'H, OsF3'5'H1, F3'5'H1	P-450 75A11	Cytochrome P450 75A11, \flavonoid 3', 5'-hydroxylase 1\", \"flavonoid 3', 5'-hydroxylase\""	CYTOCHROME P450 75A11	Biochemical character, Coloration - Anthocyanin	Os03g0367101/Os03g0367200		GO:0009813 - flavonoid biosynthetic process		PO:0009049 - inflorescence
PL	LOC_Os03g25190	3	14397050	14398345	+	93625753	OsFBX87 20- 20F-box 20domain 20containing 20protein 2C 20expressed	QTN	ISAH_WS2021	_	OsFbox142, Os_F0023, OsFBX87, FBX87	_	F-box protein 142, F-box-type E3 ubiquitin ligase X87			Os03g0367300
PL	LOC_Os03g25220	3	14413586	14414908	-	93625753	OsFBX88 20- 20F-box 20domain 20containing 20protein 2C 20expressed	QTN	ISAH_WS2021	_	OsFbox143, Os_F0129, OsFBX88, FBX88	_	F-box protein 143, F-box-type E3 ubiquitin ligase X88			Os03g0367400
PL	LOC_Os03g25240	3	14419023	14420362	+	93625753	OsFBX89 20- 20F-box 20domain 20containing 20protein 2C 20expressed	QTN	ISAH_WS2021	_	OsFbox144, Os_F0237, OsFBX89, FBX89	_	F-box protein 144, F-box-type E3 ubiquitin ligase X89			Os03g0367600
PL	LOC_Os03g25250	3	14422982	14424331	-	93625753	OsFBX90 20- 20F-box 20domain 20containing 20protein 2C 20expressed	QTN	ISAH_WS2021	_	OsFbox145, Os_F0026, OsFBX90, FBX90	_	F-box protein 145, F-box-type E3 ubiquitin ligase X90			Os03g0367700
PL	LOC_Os03g25260	3	14424629	14427869	+	93625753	HIT 20zinc 20finger 20domain 20containing 20protein 2C 20expressed	QTN	ISAH_WS2021	DLN87	OsDLN87	DLN REPRESSOR 87	DLN repressor 87, DLN motif protein 87	DLN REPRESSOR 87		Os03g0367800		GO:0009909 - regulation of flower development, GO:0031063 - regulation of histone deacetylation, GO:0000812 - Swr1 complex, GO:0031491 - nucleosome binding, GO:0042826 - histone deacetylase binding, GO:0042802 - identical protein binding, GO:0042742 - defense response to bacterium, GO:0043486 - histone exchange, GO:0048638 - regulation of developmental growth, GO:0046872 - metal ion binding
PL	LOC_Os03g25270	3	14431629	14435433	+	93625753	pyrrolidone-carboxylate 20peptidase 2C 20putative 2C 20expressed	QTN	ISAH_WS2021
PL	LOC_Os03g25280	3	14436110	14437455	-	93625753	peroxidase 20precursor 2C 20putative 2C 20expressed	QTN	ISAH_WS2021	_	prx42	_	class III peroxidase 42		Biochemical character, Tolerance and resistance - Stress tolerance, Tolerance and resistance - Disease resistance	Os03g0368000		GO:0004601 - peroxidase activity, GO:0046872 - metal ion binding, GO:0020037 - heme binding, GO:0006979 - response to oxidative stress
PL	LOC_Os03g25300	3	14445497	14446894	+	93625753	peroxidase 20precursor 2C 20putative 2C 20expressed	QTN	ISAH_WS2021	_	prx43, OsPRX43	_	class III peroxidase 43		Tolerance and resistance - Stress tolerance, Tolerance and resistance - Disease resistance, Biochemical character	Os03g0368300		GO:0006979 - response to oxidative stress, GO:0046872 - metal ion binding, GO:0020037 - heme binding, GO:0004601 - peroxidase activity
PL	LOC_Os03g25310	3	14448597	14449419	-	93625753	expressed 20protein	QTN	ISAH_WS2021
PL	LOC_Os03g25314	3	14450256	14450627	+	93625753	expressed 20protein	QTN	ISAH_WS2021
PL	LOC_Os03g25320	3	14454729	14456489	+	93625753	peroxidase 20precursor 2C 20putative 2C 20expressed	QTN	ISAH_WS2021	_	prx44	_	class III peroxidase 44		Biochemical character, Tolerance and resistance - Disease resistance, Tolerance and resistance - Stress tolerance			GO:0020037 - heme binding, GO:0046872 - metal ion binding, GO:0004601 - peroxidase activity, GO:0006979 - response to oxidative stress
PL	LOC_Os03g30740	3	17514965	17521916	-	96772228	expressed 20protein	QTN	ISAH_WS2020
PL	LOC_Os03g30750	3	17523760	17525839	-	96772228	hypothetical 20protein	QTN	ISAH_WS2020
PL	LOC_Os03g30790	3	17550976	17556308	-	96772228	erlin-2 20precursor 2C 20putative 2C 20expressed	QTN	ISAH_WS2020
PL	LOC_Os03g30800	3	17558704	17561101	+	96772228	fumarylacetoacetate 20hydrolase 20family 20protein 2C 20expressed	QTN	ISAH_WS2020
PL	LOC_Os03g30810	3	17561862	17566097	-	96772228	retrotransposon 20protein 2C 20putative 2C 20unclassified 2C 20expressed	QTN	ISAH_WS2020
PL	LOC_Os03g30830	3	17569732	17572178	-	96772228	X8 20domain 20containing 20protein 2C 20expressed	QTN	ISAH_WS2020
PL	LOC_Os03g30840	3	17576062	17577177	+	96772228	expressed 20protein	QTN	ISAH_WS2020
PL	LOC_Os03g30850	3	17581151	17581456	+	96772228	hypothetical 20protein	QTN	ISAH_WS2020
PL	LOC_Os03g30880	3	17597720	17598603	-	96772228	retrotransposon 20protein 2C 20putative 2C 20Ty3-gypsy 20subclass 2C 20expressed	QTN	ISAH_WS2020	_	OsTCP12, TCP12	_	TEOSINTE BRANCHED/CYCLOIDEA/PROLIFERATING CELL FACTOR 12					GO:0005634 - nucleus
PL	LOC_Os03g30890	3	17599288	17603532	+	96772228	S-locus-like 20receptor 20protein 20kinase 2C 20putative 2C 20expressed	QTN	ISAH_WS2020	SDRLP8	SDRLP-8, OsSDRLP-8, OsSDRLP8	S-DOMAIN RECEPTOR LIKE PROTEIN 8	S-Domain receptor like protein-8	S-DOMAIN RECEPTOR LIKE PROTEIN 8	Tolerance and resistance - Stress tolerance, Biochemical character	Os03g0422800		GO:0048544 - recognition of pollen, GO:0016021 - integral to membrane, GO:0009414 - response to water deprivation, GO:0009409 - response to cold, GO:0006468 - protein amino acid phosphorylation, GO:0004674 - protein serine/threonine kinase activity, GO:0005524 - ATP binding, GO:0005886 - plasma membrane	TO:0000276 - drought tolerance, TO:0000303 - cold tolerance	PO:0009046 - flower
PL	LOC_Os03g30910	3	17605272	17607751	+	96772228	disease 20resistance 20protein 20RPM1 2C 20putative 2C 20expressed	QTN	ISAH_WS2020
PL	LOC_Os03g61010	3	34663343	34668223	+	113920749 , 113874575	protein 20kinase 20family 20protein 2C 20putative 2C 20expressed	genic	WS20	RLCK119	OsRLCK119, OsBSK4, BSK4	RECEPTOR-LIKE CYTOPLASMIC KINASE 119	Receptor-like Cytoplasmic Kinase 119, BR-signaling kinase 4, brassinosteroid-signaling kinase 4, brassinosteroid-SIGNALING KINASE 4	RECEPTOR-LIKE CYTOPLASMIC KINASE 119	Tolerance and resistance - Stress tolerance, Tolerance and resistance - Disease resistance	Os03g0825300		GO:0050832 - defense response to fungus, GO:0005524 - ATP binding, GO:0009741 - response to brassinosteroid stimulus, GO:0009651 - response to salt stress, GO:0004672 - protein kinase activity, GO:0009733 - response to auxin stimulus, GO:0009751 - response to salicylic acid stimulus, GO:0009409 - response to cold, GO:0010224 - response to UV-B, GO:0009739 - response to gibberellin stimulus, GO:00…	TO:0000601 - UV-B light sensitivity, TO:0000615 - abscisic acid sensitivity, TO:0006001 - salt tolerance, TO:0000163 - auxin sensitivity, TO:0000166 - gibberellic acid sensitivity, TO:0002677 - brassinosteroid sensitivity, TO:0000303 - cold tolerance, TO:0000074 - blast disease, TO:0000255 - sheath blight disease resistance, TO:0000175 - bacterial blight disease resistance
PL	LOC_Os03g61100	3	34708403	34711045	-	113920749 , 113874575	GDP-mannose 20transporter 2C 20putative 2C 20expressed	nongenic	WS20
PL	LOC_Os03g61110	3	34712797	34715106	+	113920749 , 113874575	RNA-binding 20motif 20protein 2C 20putative 2C 20expressed	nongenic	WS20	C3H25	OsC3H25	ZINC FINGER CCCH DOMAIN-CONTAINING PROTEIN 25	Zinc finger CCCH domain-containing protein 25	ZINC FINGER CCCH DOMAIN-CONTAINING PROTEIN 25	Other	Os03g0826400		GO:0000166 - nucleotide binding, GO:0003723 - RNA binding, GO:0008270 - zinc ion binding, GO:0003677 - DNA binding
PL	LOC_Os03g61190	3	34750809	34754441	-	113960442 , 113920749	retrotransposon 20protein 2C 20putative 2C 20unclassified 2C 20expressed	genic	WS20
PL	LOC_Os03g61210	3	34759288	34763054	-	113960442 , 113972318	domain 20of 20unknown 20function 20domain 20containing 20protein 2C 20expressed	nongenic	WS20
PL	LOC_Os03g61220	3	34765939	34772346	+	113960442 , 113972318	DEAD-box 20ATP-dependent 20RNA 20helicase 203 2C 20putative 2C 20expressed	nongenic	WS20	_	OsRH3	_	RNA helicase 3			Os03g0827700		GO:0005524 - ATP binding, GO:0009570 - chloroplast stroma, GO:0008026 - ATP-dependent helicase activity, GO:0005634 - nucleus, GO:0003723 - RNA binding, GO:0009941 - chloroplast envelope
PL	LOC_Os03g61470	3	34870676	34871354	-	114080412	uncharacterized 20Cys-rich 20domain 20containing 20protein 2C 20putative 2C 20expressed	nongenic	ISARC, WS20	FWL6	OsFWL6, OsCNR10, CNR10, OsFWL5/OsPCR1, OsFWL5, OsPCR1, FWL5, PCR1	FW2.2-LIKE 6	FW2.2-like 6, fruit-weight 2.2-like 6, CELL NUMBER REGULATOR10, plant cadmium resistance 1	FW2.2-LIKE 6	Character as QTL - Yield and productivity, Tolerance and resistance - Stress tolerance, Vegetative organ - Leaf	Os03g0830200		GO:0005886 - plasma membrane, GO:0048366 - leaf development, GO:0005737 - cytoplasm, GO:0046686 - response to cadmium ion, GO:0005634 - nucleus	TO:0000396 - grain yield, TO:0000080 - micronutrient sensitivity, TO:0000655 - leaf development trait, TO:0000547 - primary branch number, TO:0000447 - filled grain number
PL	LOC_Os03g61480	3	34873910	34874540	-	114080412	uncharacterized 20Cys-rich 20domain 20containing 20protein 2C 20putative 2C 20expressed	nongenic	ISARC, WS20	FWL8	OsFWL8	FRUIT-WEIGHT2.2-LIKE 8	FW2.2-like 8	FRUIT-WEIGHT2.2-LIKE 8	Tolerance and resistance - Stress tolerance	Os03g0830300		GO:0046686 - response to cadmium ion, GO:0005634 - nucleus	TO:0000080 - micronutrient sensitivity
PL	LOC_Os03g61510	3	34891135	34892049	-	114080412 , 114101799	pectinesterase 20inhibitor 20domain 20containing 20protein 2C 20expressed	nongenic	WS20	PMEI15	OsPMEI15	PECTIN METHYLESTERASES INHIBITOR 15	pectin methylesterases inhibitor 15	PECTIN METHYLESTERASES INHIBITOR 15	Biochemical character	Os03g0830600		GO:0043086 - negative regulation of catalytic activity, GO:0004857 - enzyme inhibitor activity
PL	LOC_Os03g61530	3	34895344	34896125	-	114080412 , 114101799	invertase 2Fpectin 20methylesterase 20inhibitor 20family 20protein 2C 20putative 2C 20expressed	nongenic	WS20	PMEI16	OsPMEI16	PECTIN METHYLESTERASES INHIBITOR 16	pectin methylesterases inhibitor 16	PECTIN METHYLESTERASES INHIBITOR 16	Biochemical character	Os03g0830800		GO:0004857 - enzyme inhibitor activity, GO:0030599 - pectinesterase activity, GO:0046910 - pectinesterase inhibitor activity
PL	LOC_Os03g61540	3	34896332	34900930	-	114105927,114080412	lipase 20class 203 20family 20protein 2C 20putative 2C 20expressed	genic	ISARC
PL	LOC_Os03g62870	3	35562754	35565081	-	114808295 , 114776869	DNA-directed 20RNA 20polymerases 20I 2C 20II 2C 20and 20III 20subunit 20RPABC3 2C 20putative 2C 20expressed	nongenic	WS21
PL	LOC_Os03g62880	3	35571689	35572611	-	114808295 , 114776869	expressed 20protein	nongenic	WS21
PL	LOC_Os04g06700	4	3529914	3532223	-	119168990	expressed 20protein	QTN	ISAH_WS2021
PL	LOC_Os04g06734	4	3539703	3547962	+	119168990	expressed 20protein	QTN	ISAH_WS2021
PL	LOC_Os04g06770	4	3555220	3562917	-	119168990	argonaute 2C 20putative 2C 20expressed	QTN	ISAH_WS2021	AGO4B	OsAGO4b, AGO4-1	ARGONAUTE 4B	Protein argonaute 4B	PROTEIN ARGONAUTE 4B	Other	Os04g0151800		GO:0003676 - nucleic acid binding, GO:0010426 - DNA methylation on cytosine within a CHH sequence, GO:0031047 - gene silencing by RNA, GO:0044030 - regulation of DNA methylation	TO:0002675 - gibberellic acid content, TO:0002676 - brassinosteroid content	PO:0008028 - reproductive shoot apical meristem , PO:0008016 - vegetative shoot apical meristem
PL	LOC_Os04g06780	4	3565425	3565745	-	119168990	expressed 20protein	QTN	ISAH_WS2021
PL	LOC_Os04g06790	4	3575300	3581634	-	119168990	2-aminoethanethiol 20dioxygenase 2C 20putative 2C 20expressed	QTN	ISAH_WS2021
PL	LOC_Os04g06800	4	3582084	3583206	-	119168990	hypothetical 20protein	QTN	ISAH_WS2021
PL	LOC_Os04g12360	4	6817620	6818374	-	122485344	retrotransposon 20protein 2C 20putative 2C 20unclassified 2C 20expressed	QTN	ISAH_WS2020
PL	LOC_Os04g12390	4	6833910	6842367	-	122485344	transposon 20protein 2C 20putative 2C 20CACTA 2C 20En 2FSpm 20sub-class 2C 20expressed	QTN	ISAH_WS2020	JRL9	OsJRL09, JRL09, OsJRL9	JACALIN-RELATED LECTIN 9		JACALIN-RELATED LECTIN 9		Os04g0200400		GO:0030246 - carbohydrate binding
PL	LOC_Os04g12410	4	6852829	6854304	+	122485344	retrotransposon 20protein 2C 20putative 2C 20unclassified 2C 20expressed	QTN	ISAH_WS2020
PL	LOC_Os04g12420	4	6858333	6863676	+	122485344	retrotransposon 20protein 2C 20putative 2C 20unclassified 2C 20expressed	QTN	ISAH_WS2020
PL	LOC_Os04g12430	4	6869662	6872863	+	122485344	expressed 20protein	QTN	ISAH_WS2020
PL	LOC_Os04g12440	4	6873850	6878134	+	122485344	retrotransposon 20protein 2C 20putative 2C 20unclassified 2C 20expressed	QTN	ISAH_WS2020
PL	LOC_Os04g12460	4	6889026	6894168	-	122485344	Leucine 20Rich 20Repeat 20family 20protein 2C 20expressed	QTN	ISAH_WS2020
PL	LOC_Os04g12480	4	6902844	6909634	-	122485344	pumilio-family 20RNA 20binding 20repeat 20containing 20protein 2C 20expressed	QTN	ISAH_WS2020
PL	LOC_Os04g12490	4	6910749	6911487	-	122485344	retrotransposon 20protein 2C 20putative 2C 20unclassified	QTN	ISAH_WS2020
PL	LOC_Os04g41100	4	24371792	24378071	+	140000760 , 140050399	cyclin-dependent 20kinase 20G-2 2C 20putative 2C 20expressed	nongenic	WS20	CDKG;2	CDKG;2, Orysa;CDKG;2	CYCLIN-DEPENDENT KINASE G;2		CYCLIN-DEPENDENT KINASE G;2	Biochemical character	Os04g0488000		GO:0008353 - RNA polymerase II carboxy-terminal domain kinase activity, GO:0004693 - cyclin-dependent protein kinase activity, GO:0005524 - ATP binding
PL	LOC_Os04g41110	4	24379793	24386408	+	140000760 , 140050399	Rad21 20 2F 20Rec8 20like 20protein 2C 20putative 2C 20expressed	nongenic	WS20	RAD21-2	OsRad21-2	RAD21-2 PROTEIN	Rad21-2 protein	RAD21-2 PROTEIN	Biochemical character	Os04g0488100		GO:0000228 - nuclear chromosome
PL	LOC_Os04g41189	4	24427104	24427367	+	140000760 , 140050399	expressed 20protein	nongenic	WS20
PL	LOC_Os04g41200	4	24431480	24440347	-	140000760 , 140050399	lipase 2C 20putative 2C 20expressed	nongenic	WS20	_	OsSTA126	_			Reproductive organ - Spikelet, flower, glume, awn	Os04g0489100				PO:0009066 - anther
PL	LOC_Os05g46010	5	26669407	26673307	+	177835580,177805567	transposon 20protein 2C 20putative 2C 20unclassified 2C 20expressed	nongenic	ISAH
PL	LOC_Os05g46020	5	26682472	26684208	+	177835580,177805567	WRKY7 2C 20expressed	nongenic	ISAH	WRKY7	OsWRKY7	WRKY GENE 7	Rice WRKY gene7	TRANSCRIPTION FACTOR WRKY7	Tolerance and resistance - Disease resistance, Tolerance and resistance - Stress tolerance	Os05g0537100		GO:0003700 - transcription factor activity, GO:0006952 - defense response, GO:0042742 - defense response to bacterium, GO:0043565 - sequence-specific DNA binding, GO:0009409 - response to cold, GO:0030912 - response to deep water, GO:0009651 - response to salt stress, GO:0009414 - response to water deprivation	TO:0006001 - salt tolerance, TO:0000524 - submergence tolerance, TO:0000303 - cold tolerance, TO:0000175 - bacterial blight disease resistance, TO:0000276 - drought tolerance
PL	LOC_Os05g46040	5	26705164	26707820	-	177835580,177805567	protein 20phosphatase 202C 2C 20putative 2C 20expressed	nongenic	ISAH	PP2C50	OsPP2C50, OsPP78, OsABIL3, ABIL3	PROTEIN PHOSPHATASE 2C50	protein phosphatase 2C50, protein phosphatase 2C 50, protein phosphatase 78, OsABI-LIKE3, ABI-LIKE3, ABI-LIKE 3	PROTEIN PHOSPHATASE 2C50		Os05g0537400		GO:0009737 - response to abscisic acid stimulus, GO:0046872 - metal ion binding, GO:0006470 - protein amino acid dephosphorylation, GO:0004722 - protein serine/threonine phosphatase activity, GO:0005737 - cytoplasm, GO:0009724 - detection of abscisic acid stimulus, GO:0010119 - regulation of stomatal movement, GO:0009788 - negative regulation of abscisic acid mediated signaling, GO:0009738 - absc…	TO:0000131 - leaf water potential, TO:0000615 - abscisic acid sensitivity	PO:0000293 - guard cell
PL	LOC_Os05g46050	5	26714507	26716028	+	177835580,177805567	OsFBDUF26 20- 20F-box 20and 20DUF 20domain 20containing 20protein 2C 20expressed	nongenic	ISAH	_	Os_F0659, OsFBDUF26, FBDUF26	_	F-box-type E3 ubiquitin ligase FBDUF26			Os05g0537700
PL	LOC_Os07g06920	7	3380634	3384085	-	215714824 , 215714945	retrotransposon 20protein 2C 20putative 2C 20Ty1-copia 20subclass	genic	WS21
PL	LOC_Os07g29684	7	17445107	17449756	+	229823303,229785641	hypothetical 20protein	nongenic	ISARC
PL	LOC_Os07g29750	7	17490699	17493026	+	229823303,229785641	glycosyl 20hydrolases 20family 2016 2C 20putative 2C 20expressed	genic	ISARC	XTH21	OsXTH21	XYLOGLUCAN ENDOTRANSGLUCOSYDASE/HYDROLASE 21	xyloglucan endotransglucosylase/hydrolase, xyloglucan endotransglucosylase 21	XYLOGLUCAN ENDOTRANSGLUCOSYLASE/HYDROLASE 21	Biochemical character	Os07g0480800		GO:0006073 - cellular glucan metabolic process, GO:0048046 - apoplast, GO:0005618 - cell wall, GO:0016762 - xyloglucan:xyloglucosyl transferase activity, GO:0005975 - carbohydrate metabolic process, GO:0004553 - hydrolase activity, hydrolyzing O-glycosyl compounds
PL	LOC_Os08g07380	8	4132495	4143561	-	246175498 , 246201313	retrotransposon 20protein 2C 20putative 2C 20unclassified 2C 20expressed	nongenic	WS21
PL	LOC_Os08g07390	8	4147048	4149998	-	246175498 , 246201313	mla1 2C 20putative 2C 20expressed	nongenic	WS21
PL	LOC_Os08g07420	8	4163744	4169899	-	246175498 , 246201313	retrotransposon 20protein 2C 20putative 2C 20unclassified 2C 20expressed	nongenic	WS21
PL	LOC_Os08g07430	8	4172146	4175556	+	246175498 , 246201313	expressed 20protein	nongenic	WS21
PL	LOC_Os08g09200	8	5327531	5334951	-	247407981,247360554	aconitate 20hydratase 20protein 2C 20putative 2C 20expressed	genic	ISAH	_	OsACO1, ACO1, OsACO2, ACO2	_	aconitase 1, aconitase 2		Tolerance and resistance - Stress tolerance, Biochemical character	Os08g0191100		GO:0055072 - iron ion homeostasis, GO:0003723 - RNA binding, GO:0009651 - response to salt stress, GO:0003994 - aconitate hydratase activity, GO:0005737 - cytoplasm, GO:0006097 - glyoxylate cycle, GO:0009408 - response to heat, GO:0046872 - metal ion binding, GO:0051539 - 4 iron, 4 sulfur cluster binding, GO:0006099 - tricarboxylic acid cycle	TO:0000259 - heat tolerance, TO:0006001 - salt tolerance, TO:0000224 - iron sensitivity
PL	LOC_Os08g09250	8	5373216	5377152	-	247407981,247360554	glyoxalase 20family 20protein 2C 20putative 2C 20expressed	nongenic	ISAH, WS21	GLYI-11	OsGLYI11, GLYI11, OsGLYII1.1, OsGLYI11.2, OsGLYI11.3, OsGLYI-11.2, Glb33	GLYOXALASE I-11	glyoxalase I-11, 33-kDa Allergen	GLYOXALASE I-11	Biochemical character, Tolerance and resistance - Stress tolerance	Os08g0191700		GO:0019863 - IgE binding, GO:0009651 - response to salt stress, GO:0006979 - response to oxidative stress, GO:0006970 - response to osmotic stress, GO:0004462 - lactoylglutathione lyase activity, GO:0019243 - methylglyoxal catabolic process to D-lactate, GO:0016151 - nickel ion binding, GO:0046872 - metal ion binding, GO:0046688 - response to copper ion	TO:0000168 - abiotic stress trait, TO:0000021 - copper sensitivity	PO:0009010 - seed , PO:0025034 - leaf , PO:0009047 - stem
PL	LOC_Os08g09260	8	5379310	5384023	-	247407981,247360554	tRNA 20synthetase 2C 20putative 2C 20expressed	nongenic	ISAH, WS21
PL	LOC_Os08g42840	8	27086410	27089863	+	269132280,269119988	leucine 20rich 20repeat 20protein 2C 20putative 2C 20expressed	nongenic	ISAH
PL	LOC_Os08g42850	8	27090851	27093355	+	269132280,269119988	peptidyl-prolyl 20cis-trans 20isomerase 2C 20FKBP-type 2C 20putative 2C 20expressed	nongenic	ISAH	_	OsFKBP16-3	_	FK506 binding protein 16-3	_	Biochemical character	Os08g0541400		GO:0006457 - protein folding, GO:0031977 - thylakoid lumen, GO:0016020 - membrane, GO:0003755 - peptidyl-prolyl cis-trans isomerase activity, GO:0005528 - FK506 binding, GO:0009507 - chloroplast
PL	LOC_Os08g42860	8	27098781	27101502	-	269132280,269119988	retrotransposon 20protein 2C 20putative 2C 20unclassified 2C 20expressed	nongenic	ISAH
PL	LOC_Os08g42870	8	27103314	27109475	-	269132280,269119988	expressed 20protein	nongenic	ISAH
PL	LOC_Os10g33950	10	18062436	18063541	-	311581360,311565426	retrotransposon 20protein 2C 20putative 2C 20unclassified 2C 20expressed	nongenic	IGKV
PL	LOC_Os10g33954	10	18080689	18080994	-	311581360,311565426	hypothetical 20protein	nongenic	IGKV
PL	LOC_Os10g33960	10	18085536	18092500	+	311581360,311565426	START 20domain 20containing 20protein 2C 20expressed	nongenic	IGKV	HOX9	Oshox9, OsHox9, OsHB2, HB2, OSHB2, OsHDZ37, OsHDZIP37, HDZ37, HDZIP37	HOMEOBOX GENE 9	rice homeobox gene 9, Homeobox-leucine zipper protein HOX9, Homeodomain transcription factor HOX9, HD-ZIP protein HOX9, HOMEODOMAIN CONTAINING PROTEIN 2, homeodomain-leucine zipper transcription factor 37, OsHDZIP transcription factor 37	HOMEOBOX-LEUCINE ZIPPER PROTEIN HOX9	Tolerance and resistance - Stress tolerance, Other, Tolerance and resistance - Insect resistance	Os10g0480200		GO:0002213 - defense response to insect, GO:0043565 - sequence-specific DNA binding, GO:0006350 - transcription, GO:0006355 - regulation of transcription, DNA-dependent, GO:0005634 - nucleus, GO:0009753 - response to jasmonic acid stimulus, GO:0009651 - response to salt stress, GO:0003677 - DNA binding, GO:0003700 - transcription factor activity, GO:0005737 - cytoplasm	TO:0000261 - insect damage resistance, TO:0000424 - brown planthopper resistance, TO:0000172 - jasmonic acid sensitivity, TO:0006001 - salt tolerance	PO:0009047 - stem , PO:0009089 - endosperm , PO:0009030 - carpel , PO:0009049 - inflorescence , PO:0025034 - leaf , PO:0009005 - root
PL	LOC_Os10g33970	10	18102574	18108764	-	311581360,311565426	double-stranded 20RNA 20binding 20motif 20containing 20protein 2C 20expressed	nongenic	IGKV	RL89	OsDRB2, DRB2, OsRL89, SRL10, OsSRL10	ROLLING LEAF 89	dsRNA-binding protein 2, DOUBLE-STRANDED RNA-BINDING2, double-stranded RNA binding protein 2, Rolling-leaf 89, SEMI-ROLLED LEAF 10	DSRNA-BINDING PROTEIN 2	Tolerance and resistance - Stress tolerance, Coloration - Chlorophyll, Reproductive organ - panicle, Vegetative organ - Culm, Vegetative organ - Leaf, Character as QTL - Yield and productivity, Tolerance and resistance - Disease resistance, Seed - Morphological traits - Grain shape	Os10g0480500		GO:0009737 - response to abscisic acid stimulus, GO:0009408 - response to heat, GO:0048366 - leaf development, GO:0001558 - regulation of cell growth, GO:0042127 - regulation of cell proliferation, GO:0005737 - cytoplasm, GO:0003725 - double-stranded RNA binding, GO:0010224 - response to UV-B, GO:0009414 - response to water deprivation, GO:0070919 - production of siRNA involved in chromatin silen…	TO:0001027 - net photosynthetic rate, TO:0000396 - grain yield, TO:0000447 - filled grain number, TO:0001015 - photosynthetic rate, TO:0000357 - growth and development trait, TO:0000259 - heat tolerance, TO:0000276 - drought tolerance, TO:0000175 - bacterial blight disease resistance, TO:0000136 - relative water content, TO:0000605 - hydrogen peroxide content, TO:0000295 - chlorophyll-b content, …	PO:0001050 - leaf development stage , PO:0009013 - portion of meristem tissue , PO:0020104 - leaf sheath , PO:0009010 - seed , PO:0009073 - stigma , PO:0009049 - inflorescence , PO:0009005 - root , PO:0009047 - stem , PO:0025034 - leaf
PL	LOC_Os11g31870	11	18726813	18728021	+	335465943	retrotransposon 20protein 2C 20putative 2C 20unclassified 2C 20expressed	QTN	ISARC_WS2020
PL	LOC_Os11g31880	11	18728970	18733435	+	335465943	phosphoglycerate 20mutase 2C 20putative 2C 20expressed	QTN	ISARC_WS2020
[truncated: 295 more rows]

## Sheet: Supplementary S6
Supplementary Table S6. The haplotype diversity for genes governing specific traits
Trait	MSU_ID	Haplotype Groups	Min	Max
DTF	LOC_Os01g23940	23	0.0010989	0.414286
DTF	LOC_Os01g39970	11	0.000813008	0.499187
DTF	LOC_Os01g72930	13	0.000754148	0.556561
DTF	LOC_Os01g73220	9	0.00835987	0.494427
DTF	LOC_Os01g73790	9	0.00199933	0.782406
DTF	LOC_Os02g05450	2	0.0390212	0.960317
DTF	LOC_Os02g05460	7	0.0440495	0.339258
DTF	LOC_Os02g05470	6	0.0111421	0.599234
DTF	LOC_Os02g05480	3	0.159767	0.58741
DTF	LOC_Os02g05490	2	0.423611	0.576389
DTF	LOC_Os02g05500	16	0.000356252	0.461703
DTF	LOC_Os02g05510	3	0.094503	0.560241
DTF	LOC_Os02g05520	2	0.109575	0.890425
DTF	LOC_Os02g05530	58	0.000388199	0.122671
[truncated: 836 more rows]

## Sheet: Supplementary Table S7
Supplementary Table S7. Candidate genes with high performing haplotypes and their average performance in all the environments for yield and related traits.
[truncated: 45 more rows]

[truncated: 4 more sheets: Supplementary Table S8, Supplementary Table S9, Supplementary Table S10, Supplementary Table S11]
