# Supplementary material
Source: Research Square preprint supplement (doi:10.21203/rs.3.rs-9601429/v1)
Supplement: Supplementary file 2 [file 82c67c14a28c00832c6b985d.docx]

**Harnessing superior haplotypes from landraces to breeding lines for enhanced yield in rice**

Niranjani Gnanapragasam1,2, Sonali Vijay Habde1,3, Krishna Tesman Sundaram1,2, Sruthi Remesan1,2, Pronob Jyoti Paul1,2, Manoj Pushkarnath1,2, Ashmitha Ganesan1,2, Vipin Kumar Pandey4, Shubha Banerjee4, Jyothi Badri5, Sanjay Kalia6, Arvind Kumar1,2,7, Ajay Kohli1, Uma Maheshwar Singh1,3, Vikas Kumar Singh1,2*, Pallavi Sinha1,2*

1 International Rice Research Institute, Los Banos, Laguna, 4031, Philippines

2 International Rice Research Institute, South Asia Hub, Patancheru, 502324, India

3 International Rice Research Institute, South Asia Regional Centre, Varanasi, 221006 India

4 Indira Gandhi Krishi Vishwavidyalaya, Raipur, 492012, India

5Indian Institute of Rice Research, Hyderabad, India

6 Department of Biotechnology, 110003, New Delhi, India

7 Current Address: Prasad Seeds, R R District, 501401, India

* **Author for Correspondence**: [p.sinha@cgiar.org](mailto:p.sinha@cgiar.org); [v.k.singh@cgiar.org](mailto:v.k.singh@cgiar.org)

**Running Title**

Superior haplotype for higher grain yield in rice


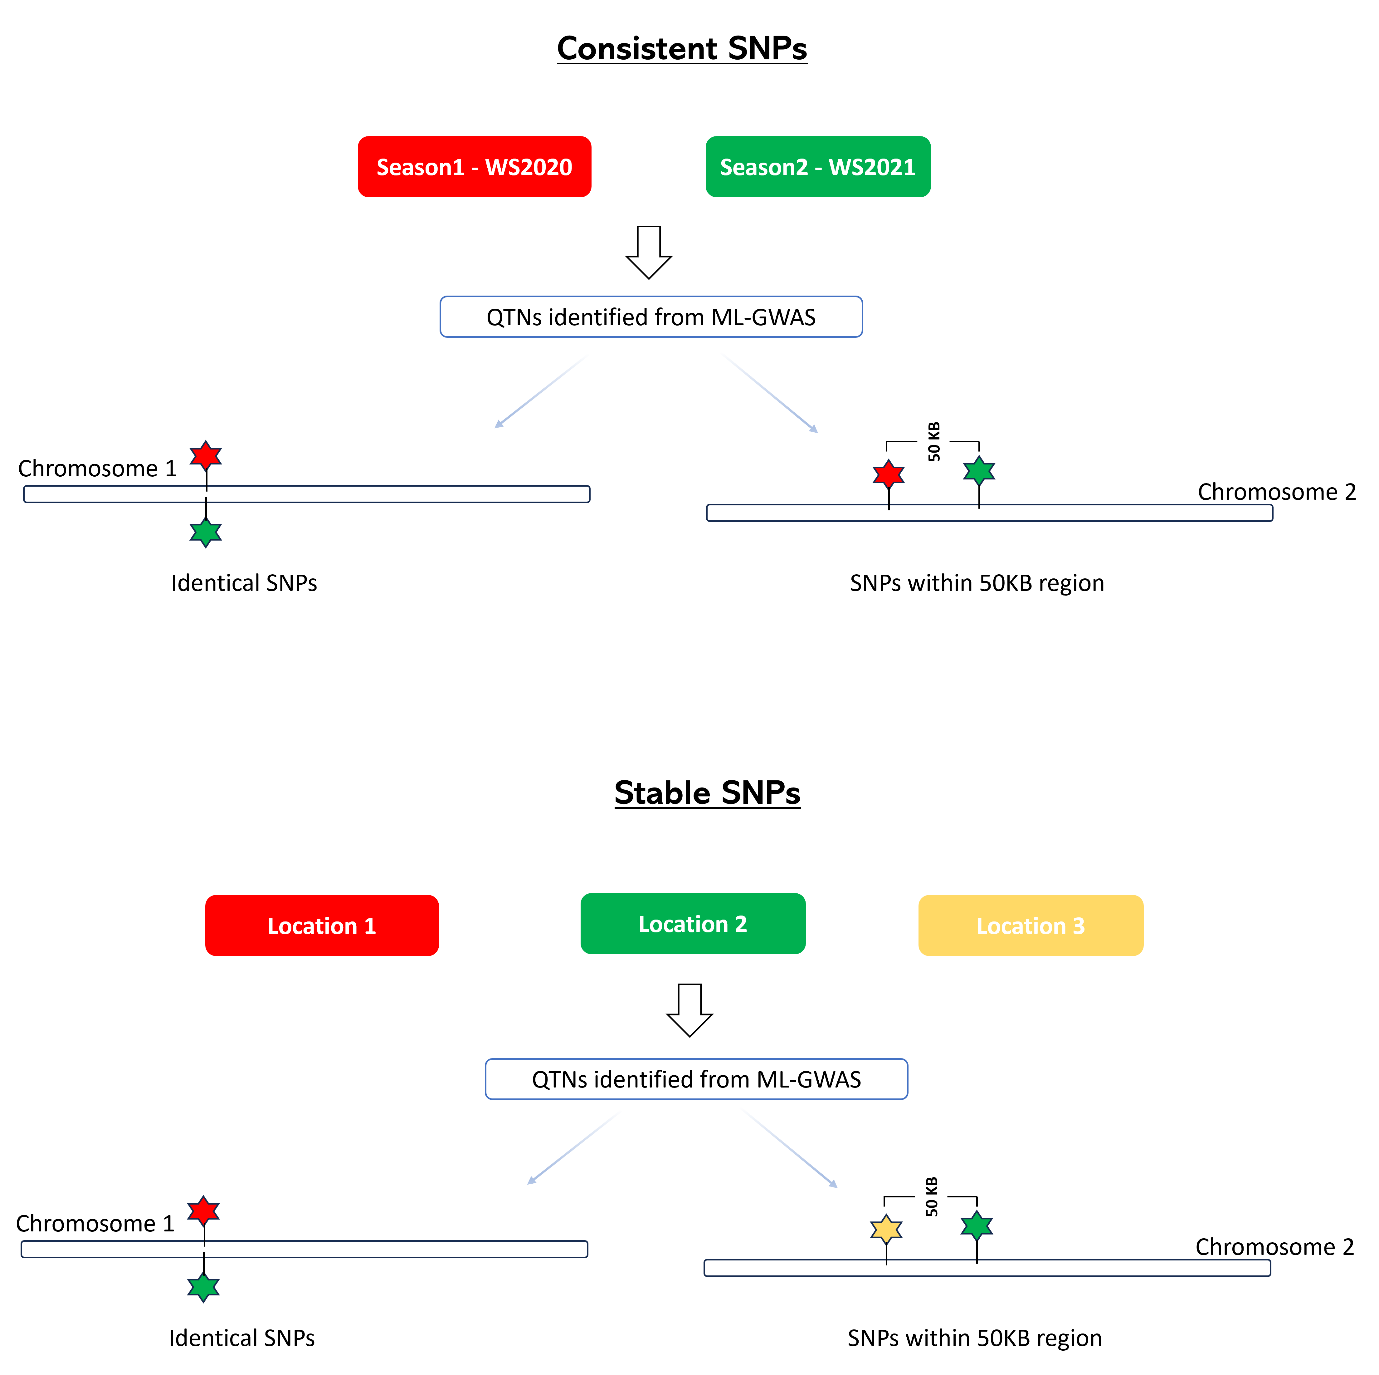


**Figure 1:** **Visual representation of the QTN selection.** A QTN is identified by two seasons in a single location, or two QTNs are identified by two seasons of a single location, present within a 50 KB region. In that case, it is considered a consistent QTN. Similarly, suppose two QTNs are identified (or within 50 KB region) by two or more locations in a single season. In that case, it is considered a stable QTN.


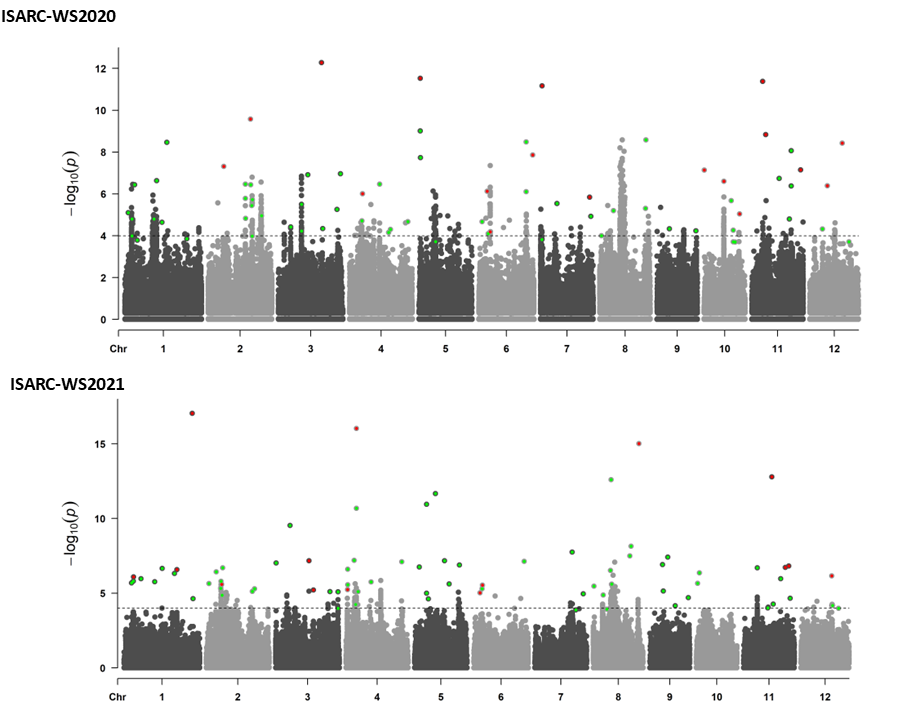

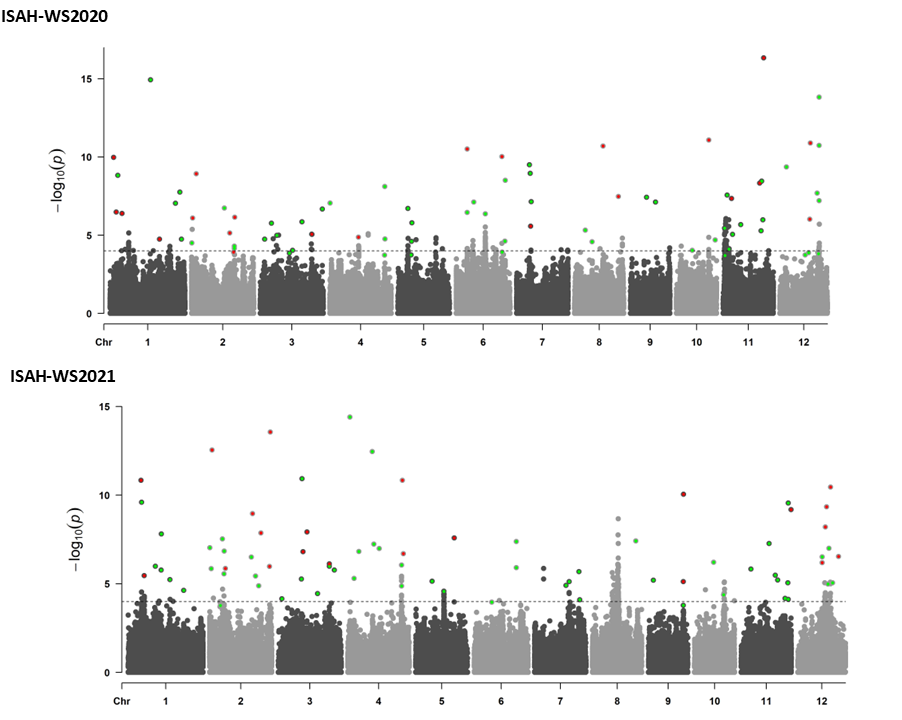


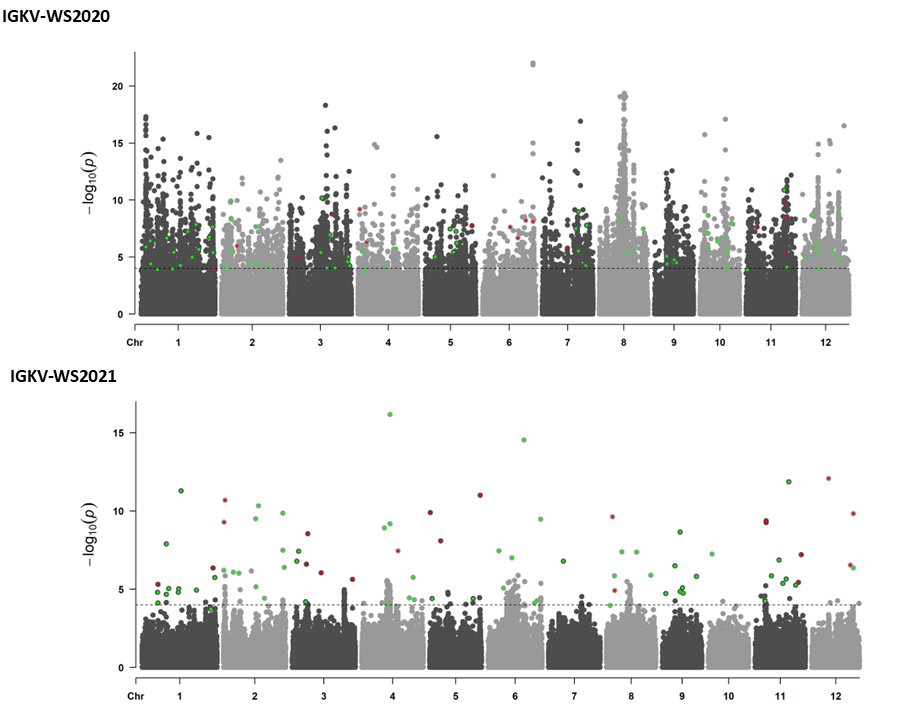


**Figure 2: Manhattan plot** showing significant QTNs associated with rice yield and yield related traits, identified across six environments using mrMLM, FASTmrMLM, FASTmrEMMA, pLARmEB and ISIS EM-BLASSO models. The -log10 (P-value) of SNP across the genome (y-axes) were plotted against their respective position on each chromosome (x-axis) for **GY**. The red dots represent all the QTNs commonly identified by more than two ML-GWAS models and the orange dots indicate QTNs identified by a single ML-GWAS model.


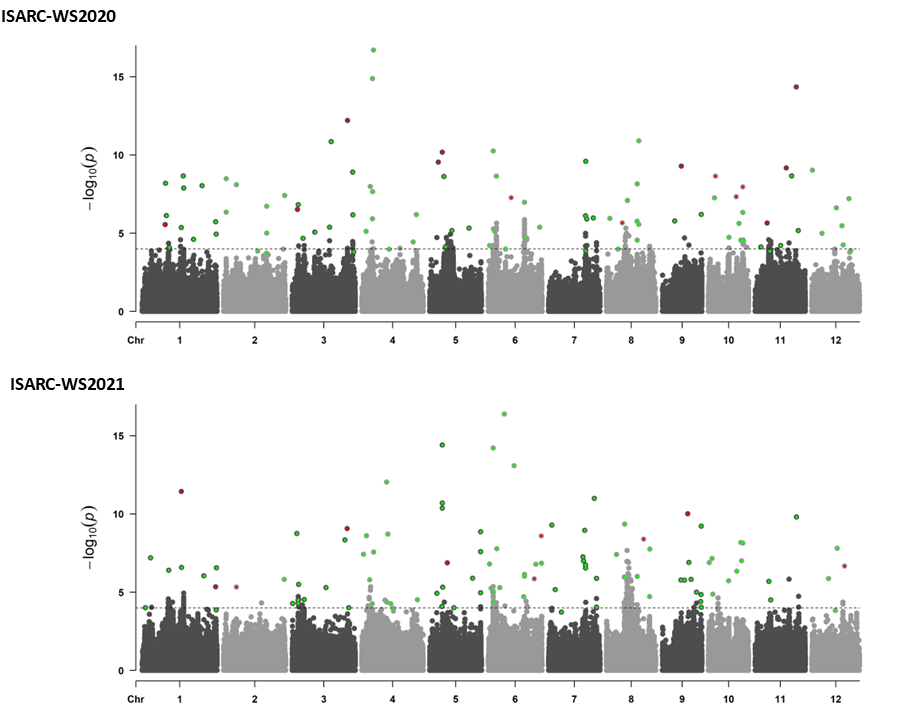

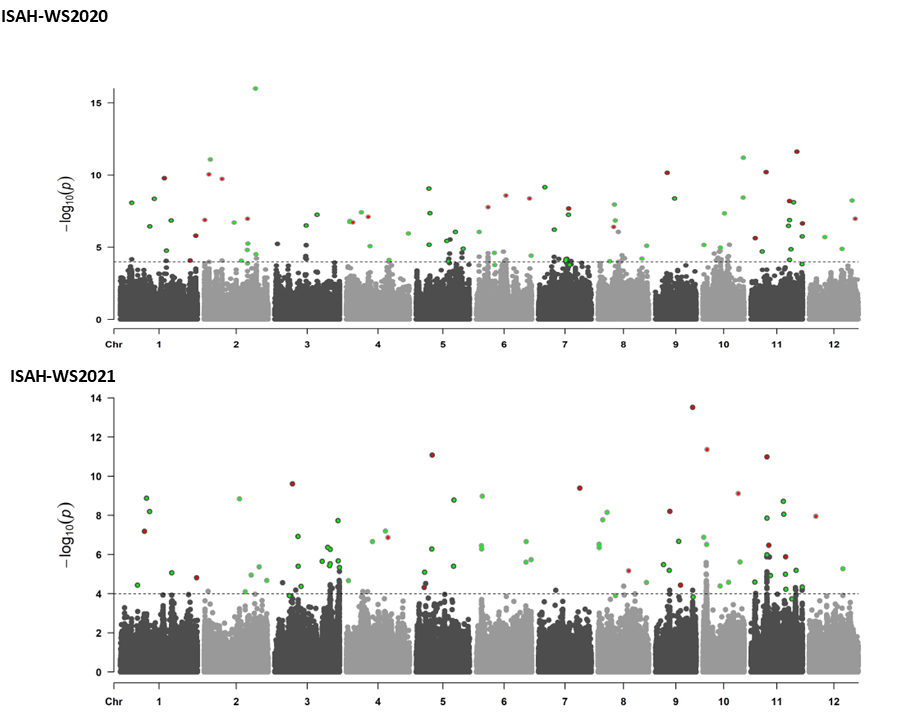


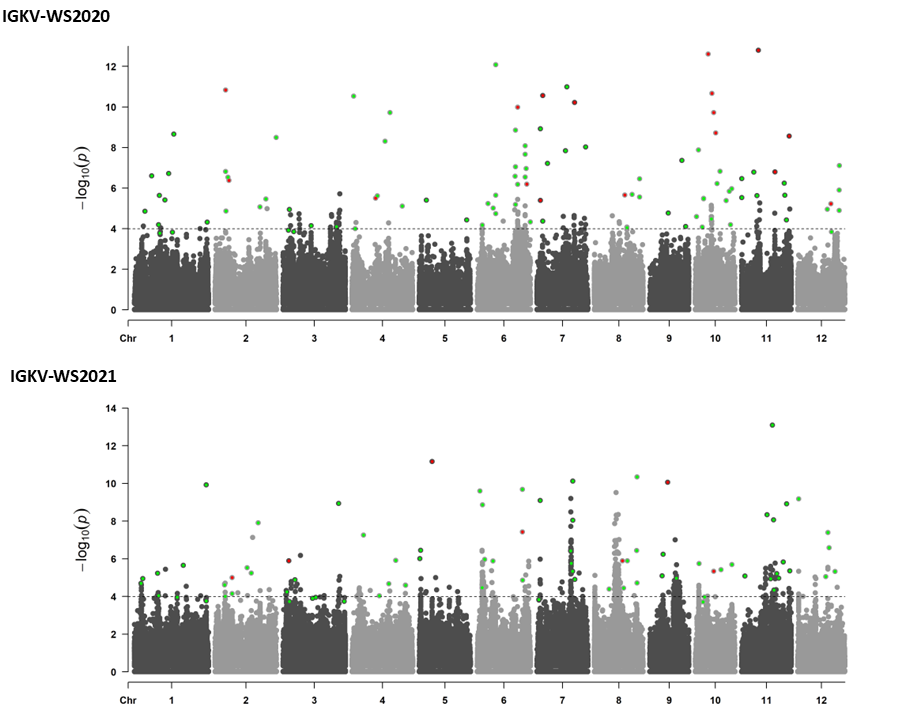


**Figure 3: Manhattan plot** showing significant QTNs associated with rice yield and yield related traits, identified across six environments using mrMLM, FASTmrMLM, FASTmrEMMA, pLARmEB and ISIS EM-BLASSO models. The -log10 (P-value) of SNP across the genome (y-axes) were plotted against their respective position on each chromosome (x-axis) for **DTF**. The red dots represent all the QTNs commonly identified by more than two ML-GWAS models and the orange dots indicate QTNs identified by a single ML-GWAS model.


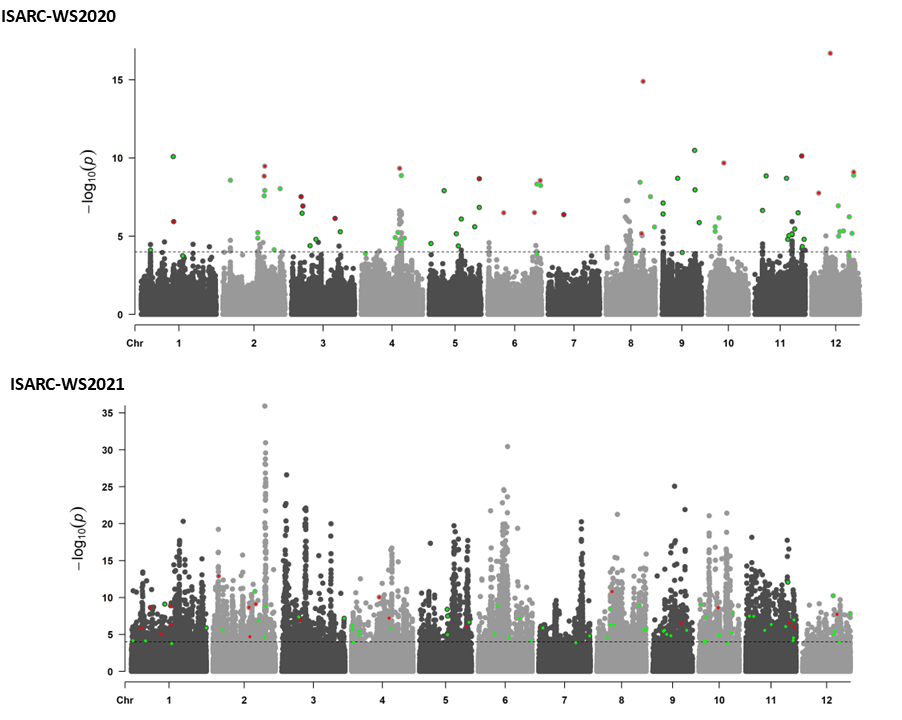

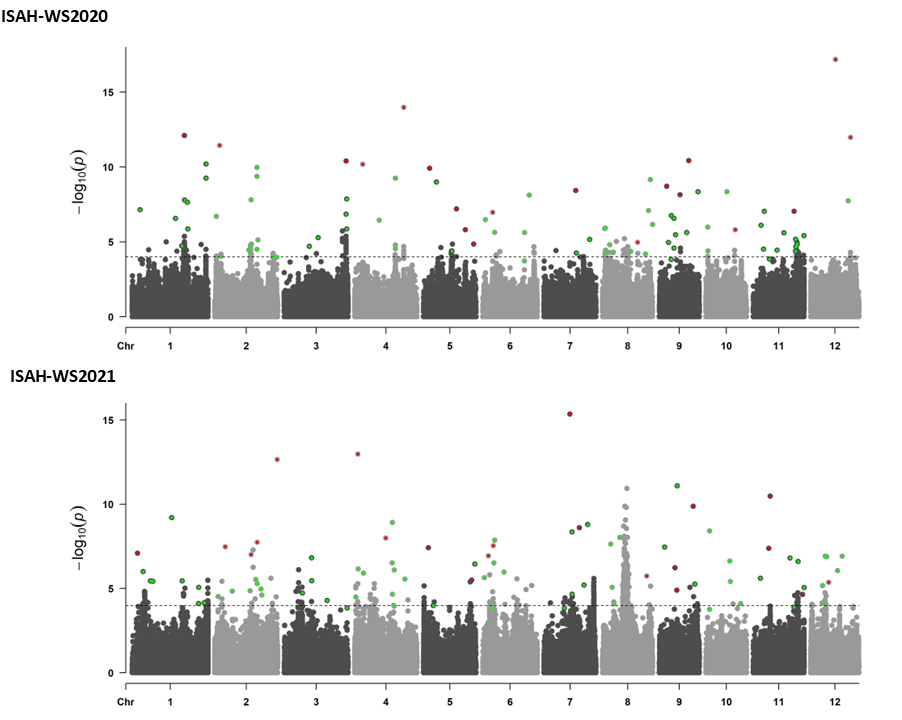


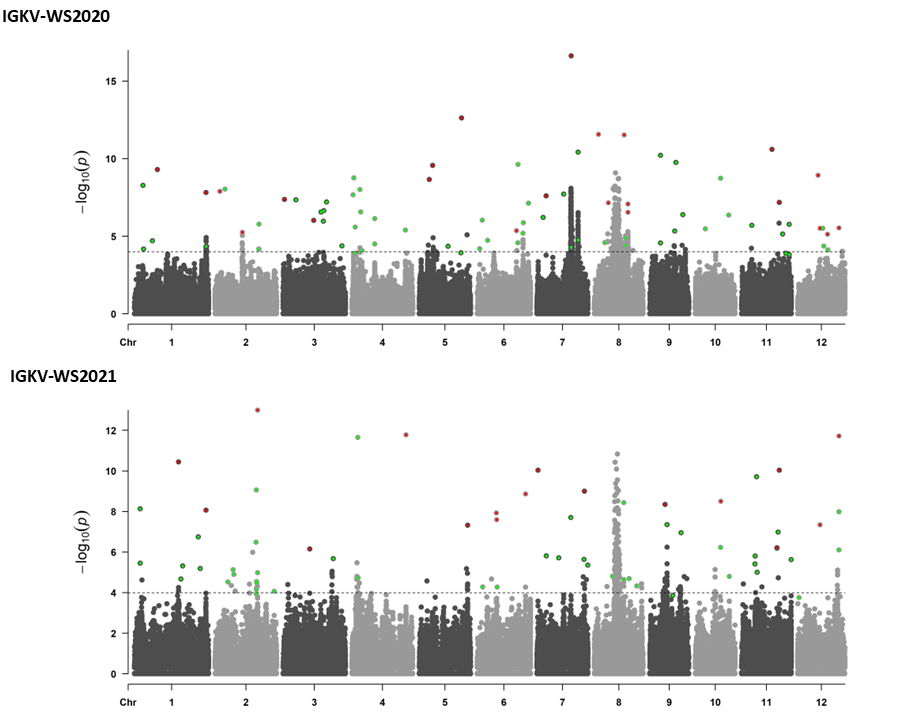


**Figure 4: Manhattan plot** showing significant QTNs associated with rice yield and yield related traits, identified across six environments using mrMLM, FASTmrMLM, FASTmrEMMA, pLARmEB and ISIS EM-BLASSO models. The -log10 (P-value) of SNP across the genome (y-axes) were plotted against their respective position on each chromosome (x-axis) for **NPT**. The red dots represent all the QTNs commonly identified by more than two ML-GWAS models and the orange dots indicate QTNs identified by a single ML-GWAS model.


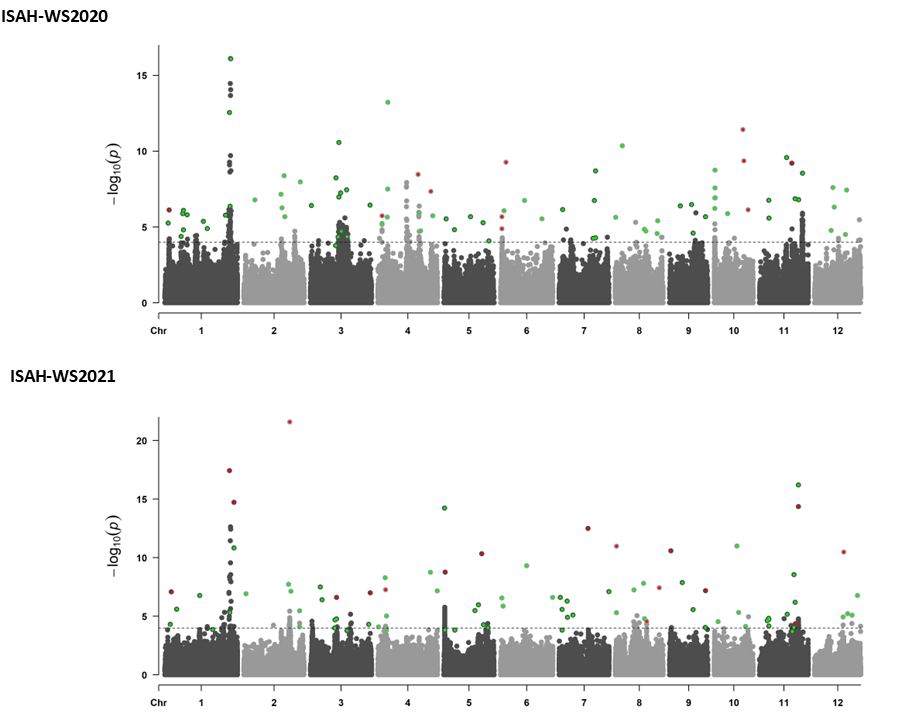


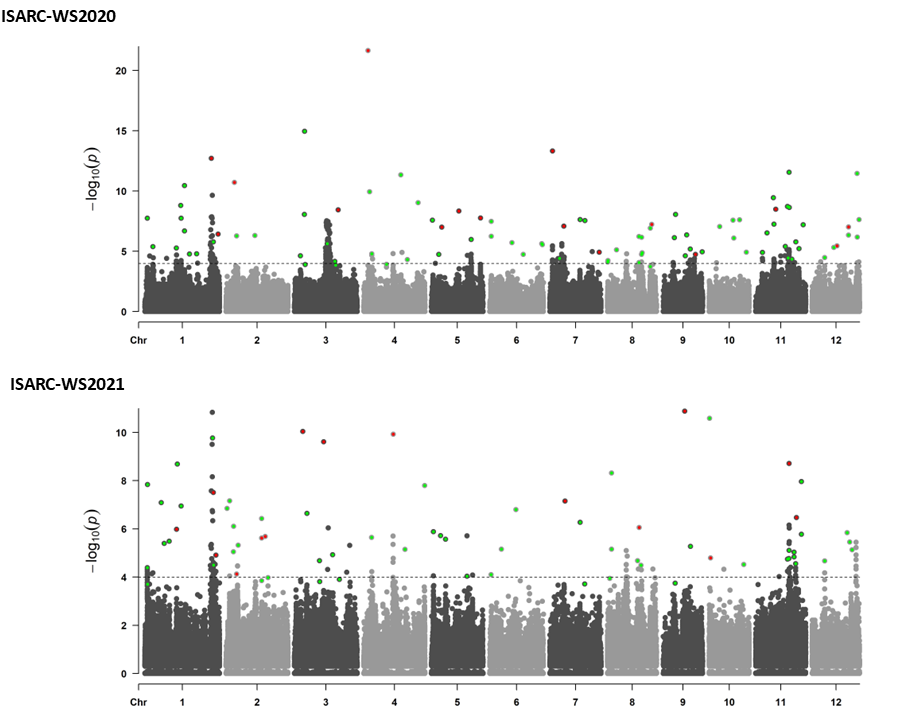


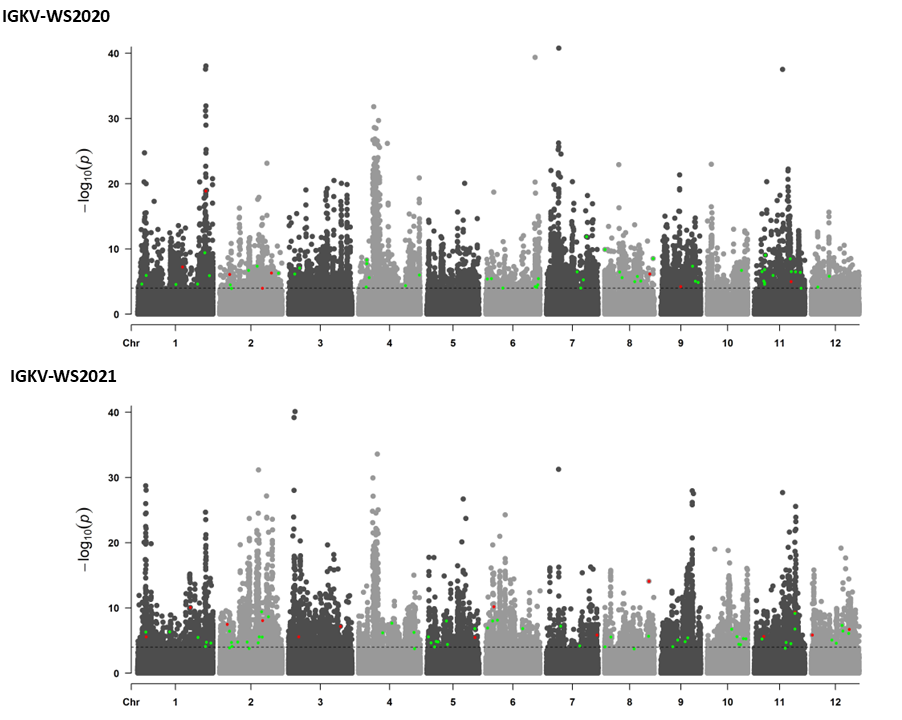


**Figure 5: Manhattan plot** showing significant QTNs associated with rice yield and yield related traits, identified across six environments using mrMLM, FASTmrMLM, FASTmrEMMA, pLARmEB and ISIS EM-BLASSO models. The -log10 (P-value) of SNP across the genome (y-axes) were plotted against their respective position on each chromosome (x-axis) for **PH**. The red dots represent all the QTNs commonly identified by more than two ML-GWAS models and the orange dots indicate QTNs identified by a single ML-GWAS model.


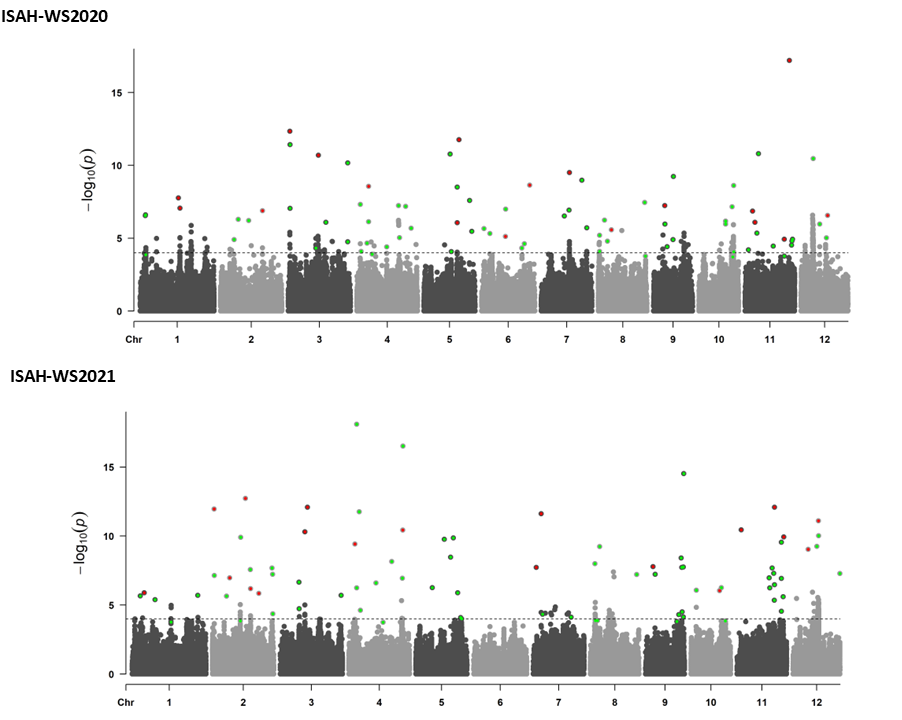


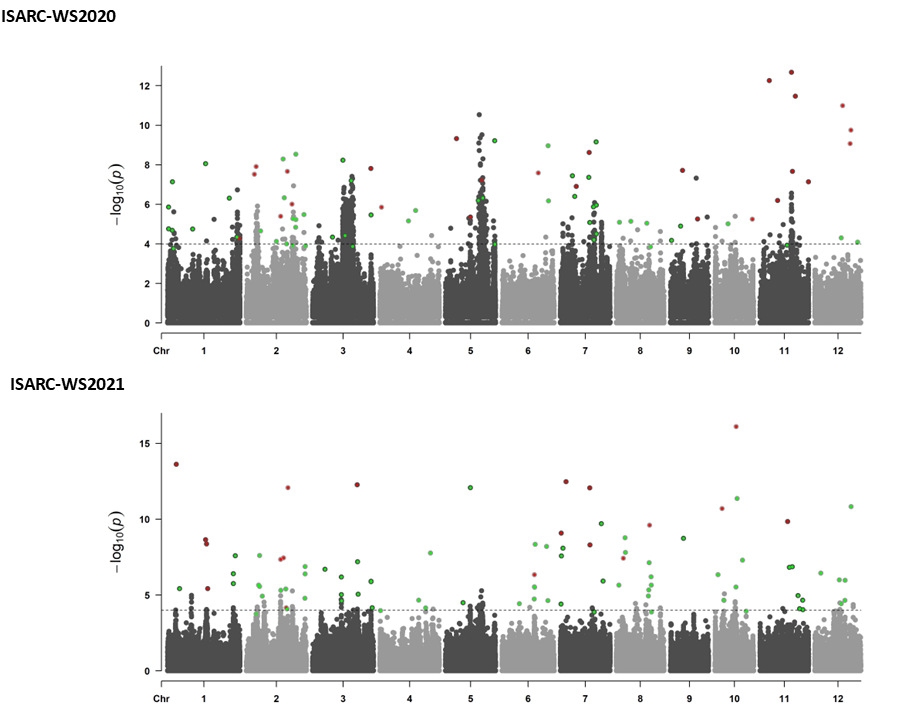


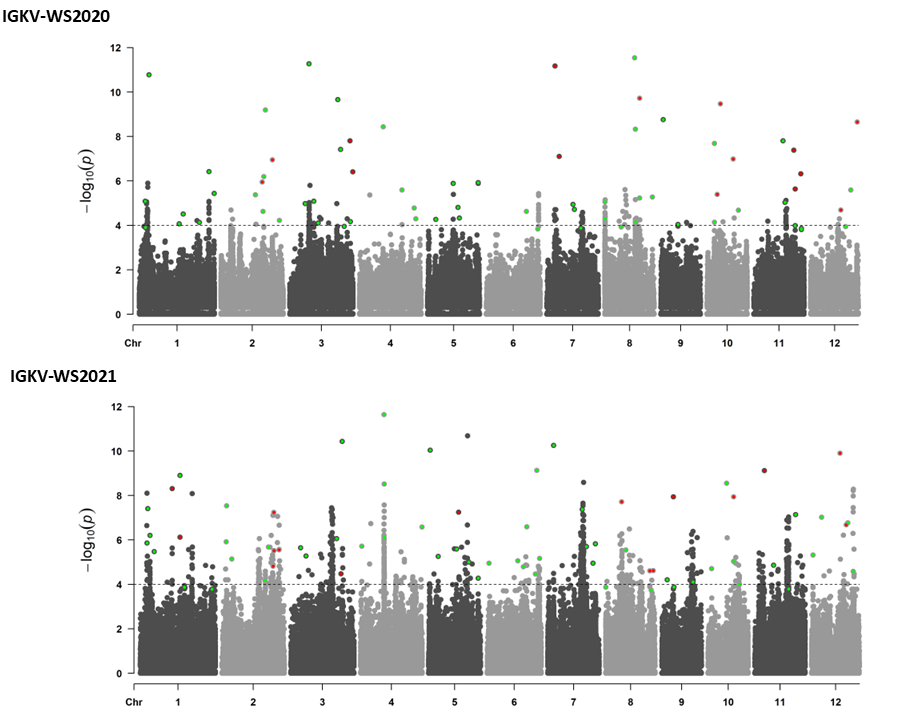


**Figure 6: Manhattan plot** showing significant QTNs associated with rice yield and yield related traits, identified across six environments using mrMLM, FASTmrMLM, FASTmrEMMA, pLARmEB and ISIS EM-BLASSO models. The -log10 (P-value) of SNP across the genome (y-axes) were plotted against their respective position on each chromosome (x-axis) for **PL**. The red dots represent all the QTNs commonly identified by more than two ML-GWAS models and the orange dots indicate QTNs identified by a single ML-GWAS model.
